# Supplementary material
Source: MDPI journal article supplement (https://www.mdpi.com/2072-4292/11/17/2013)

# Site: AAMU\_JTG

## AMSRE Average

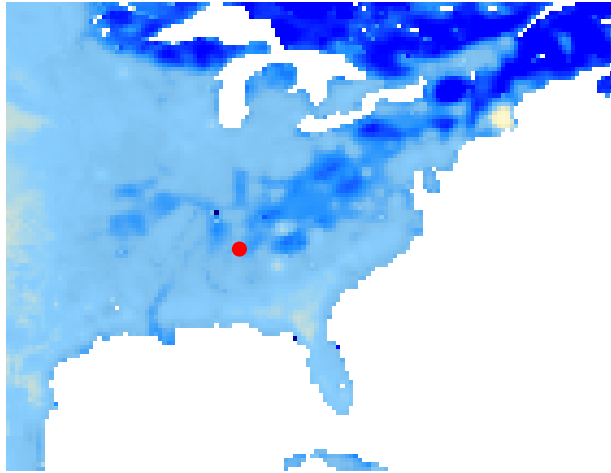

## SMOS Average

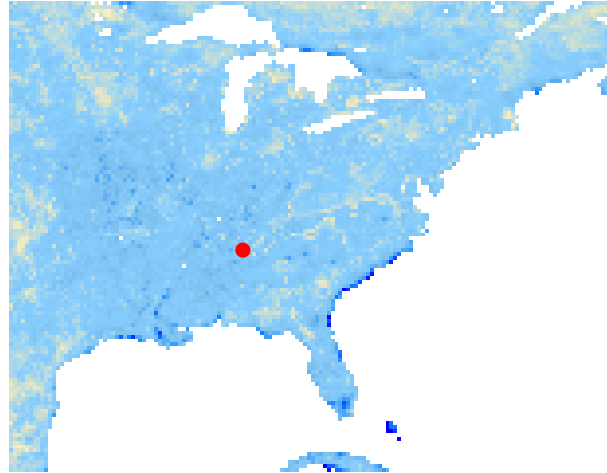

## SMAP Average

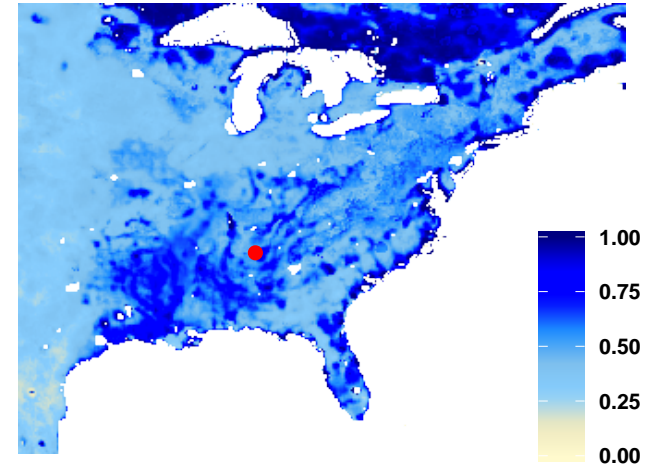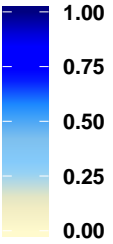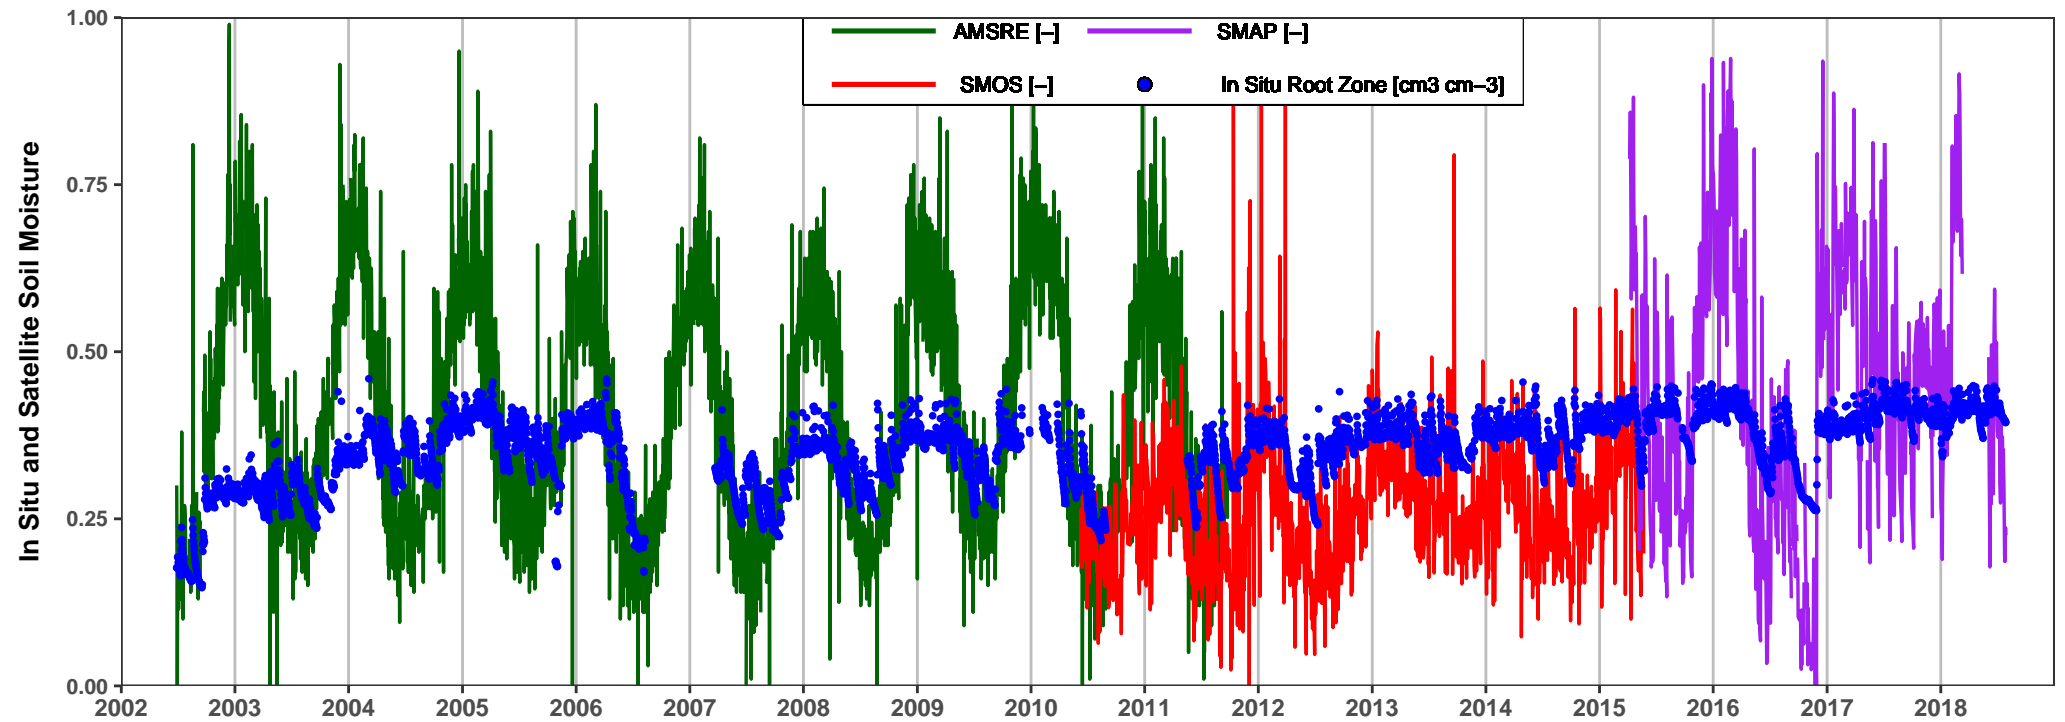

# Site: AllenFarms

## AMSRE Average

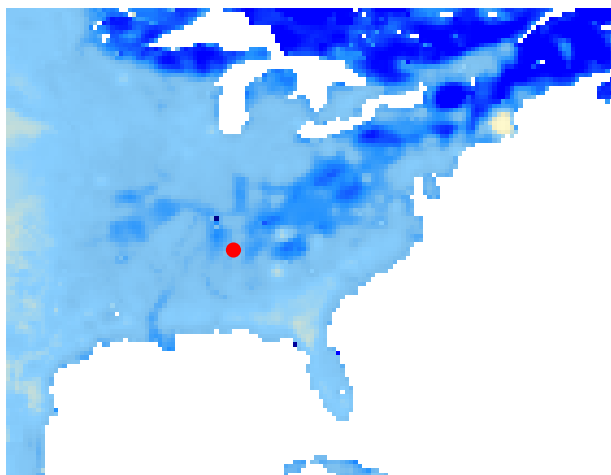

## SMOS Average

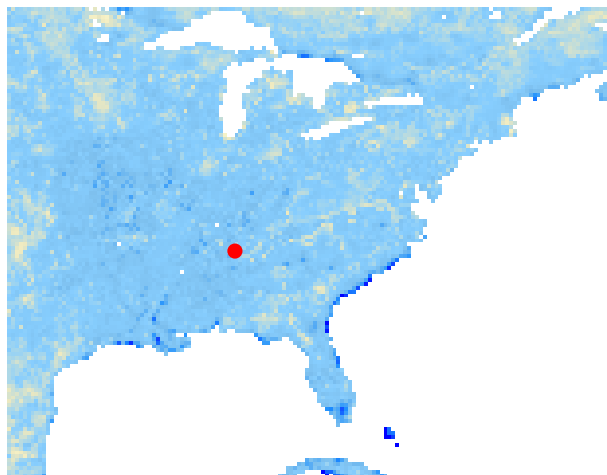

## SMAP Average

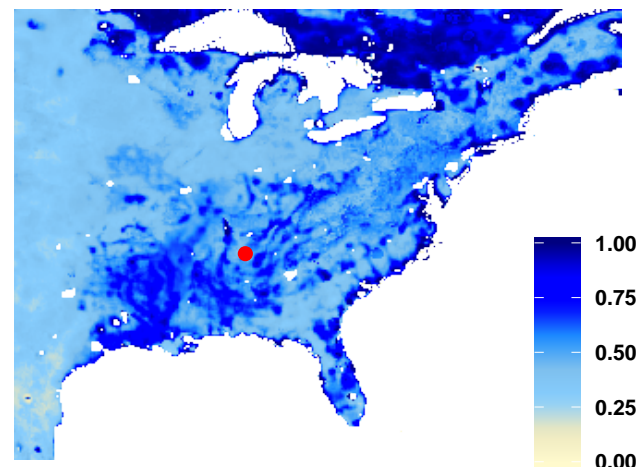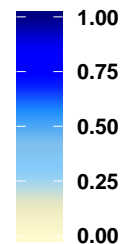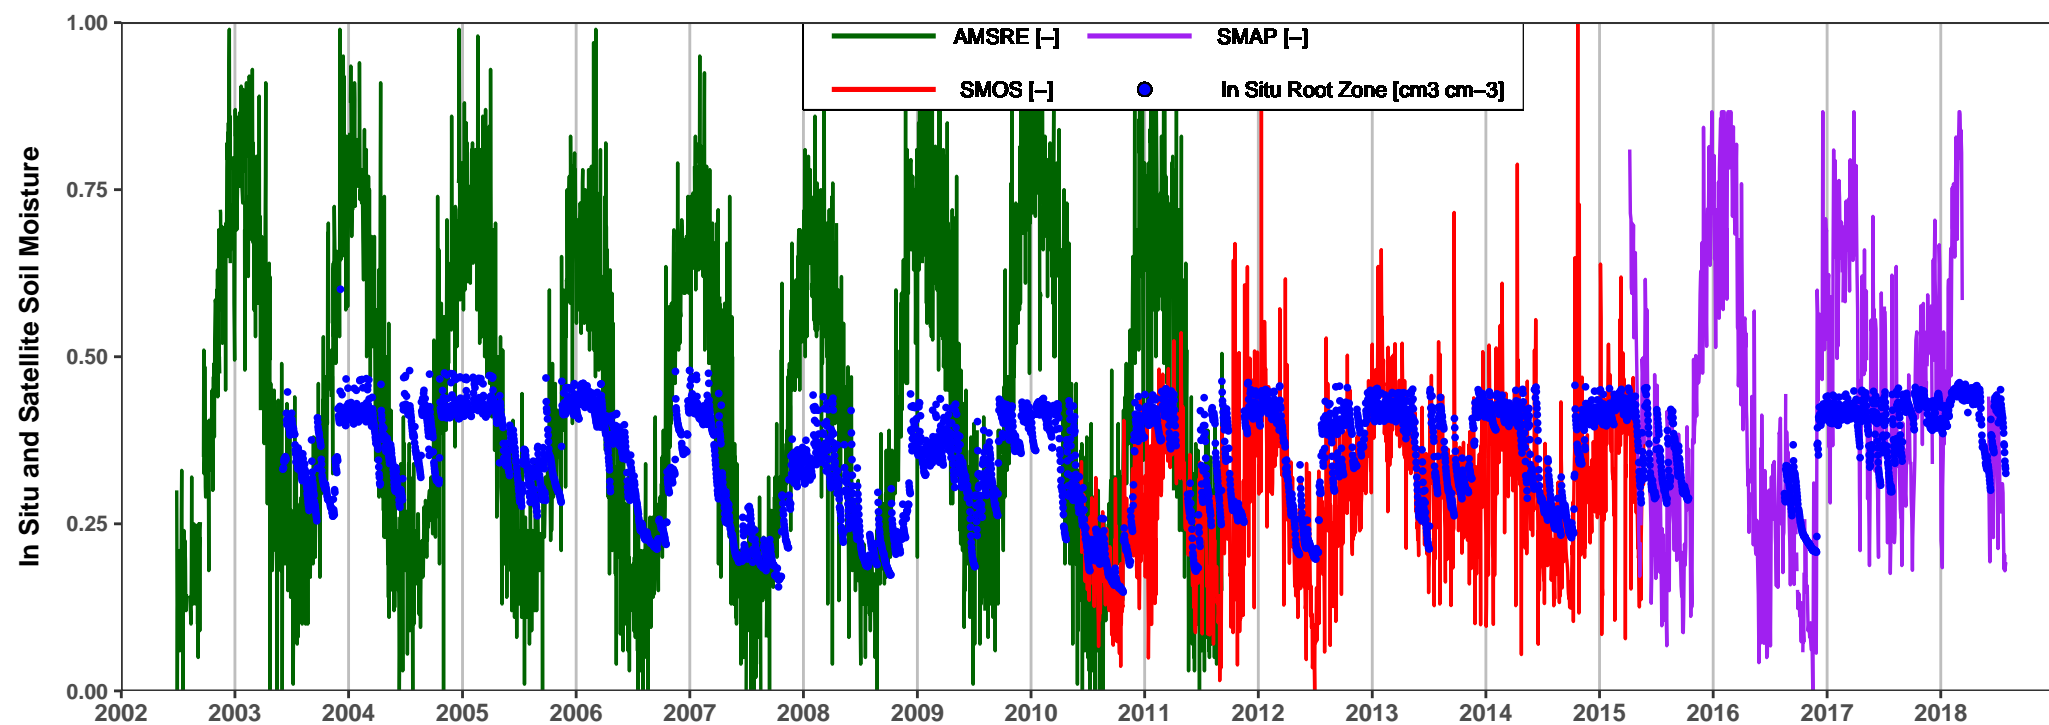

# Site: BeasleyLake

## AMSRE Average

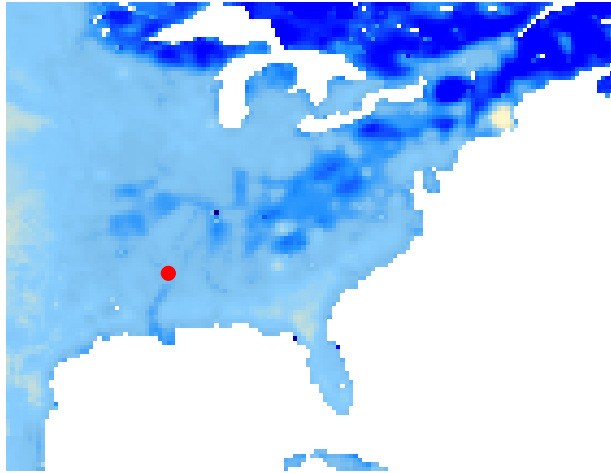

## SMOS Average

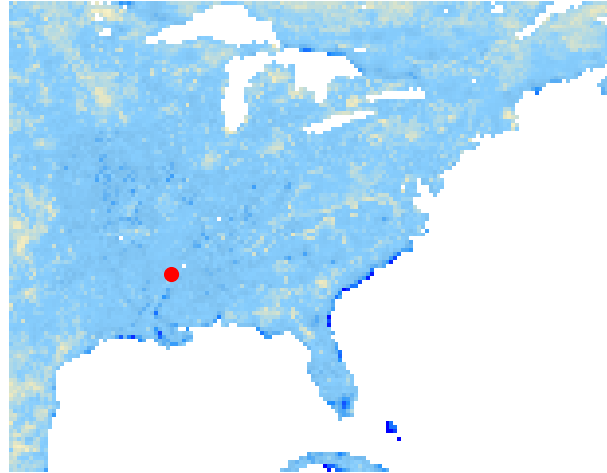

## SMAP Average

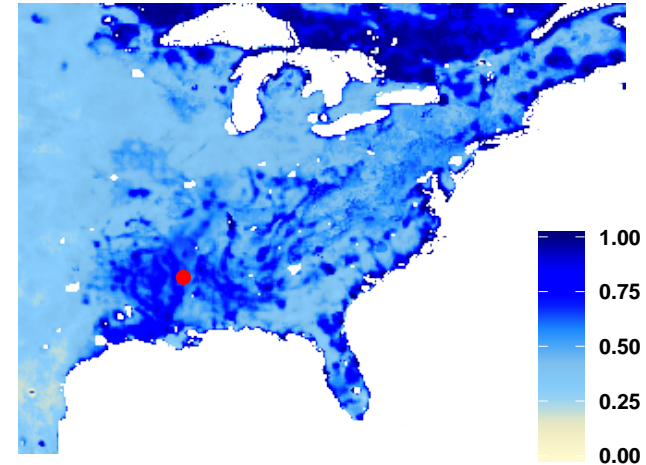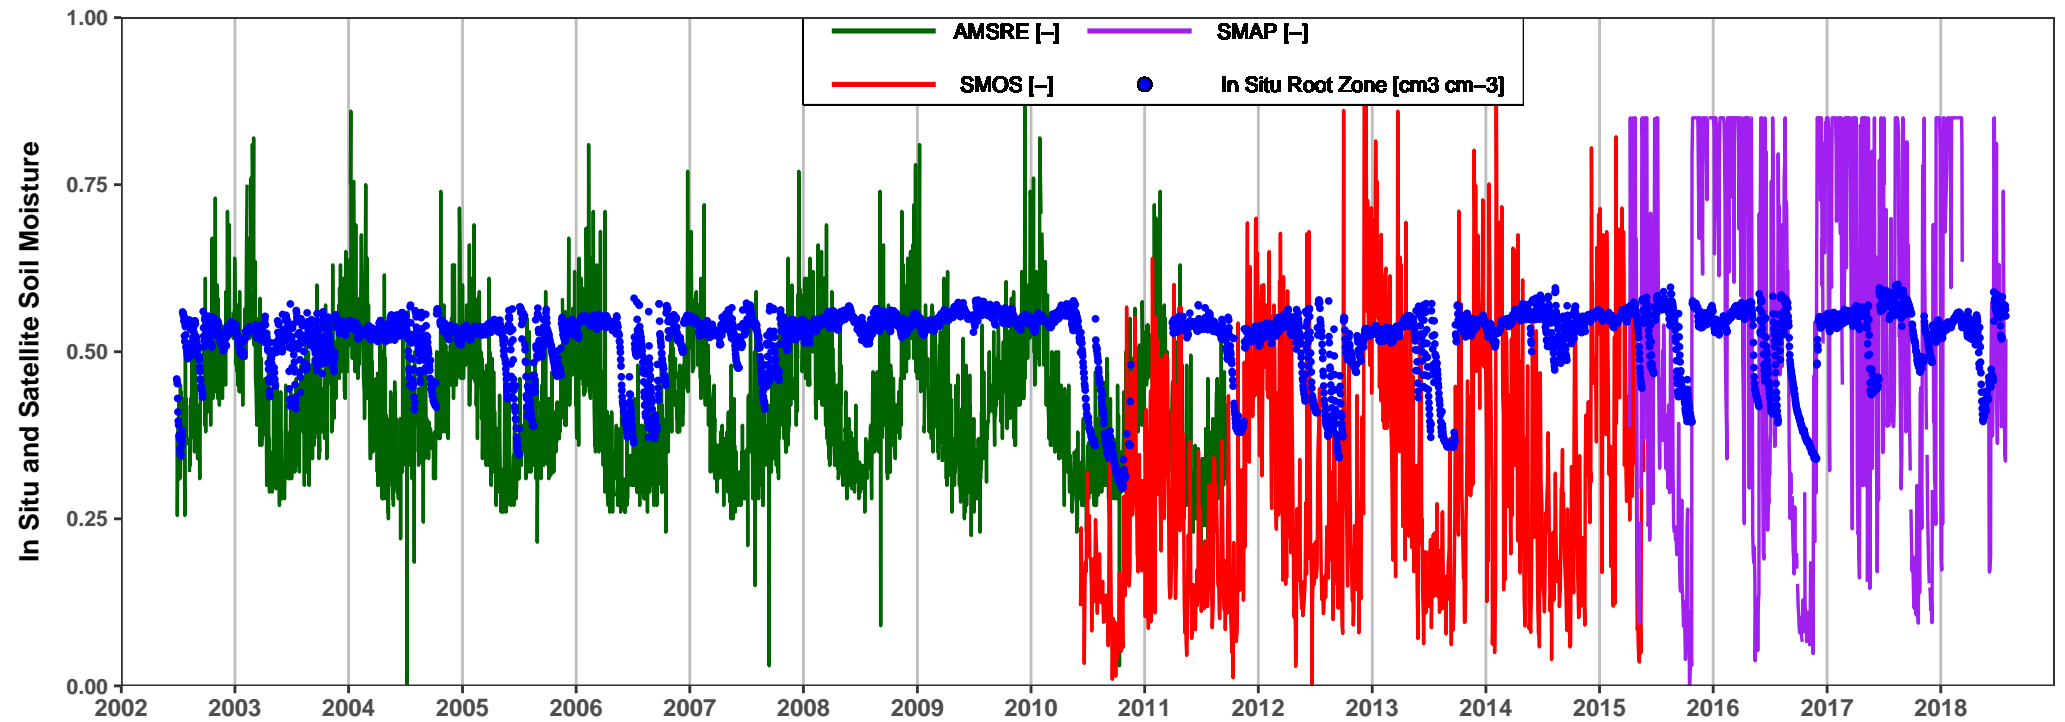

# Site: BraggFarm

## AMSRE Average

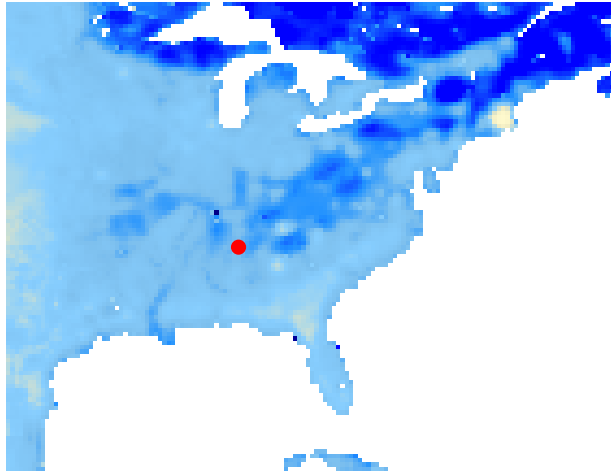

## SMOS Average

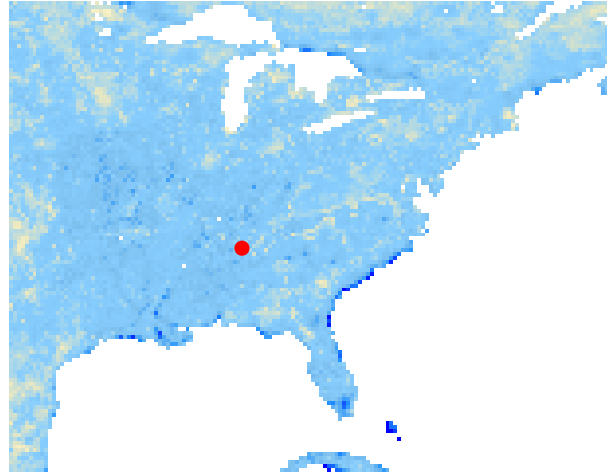

## SMAP Average

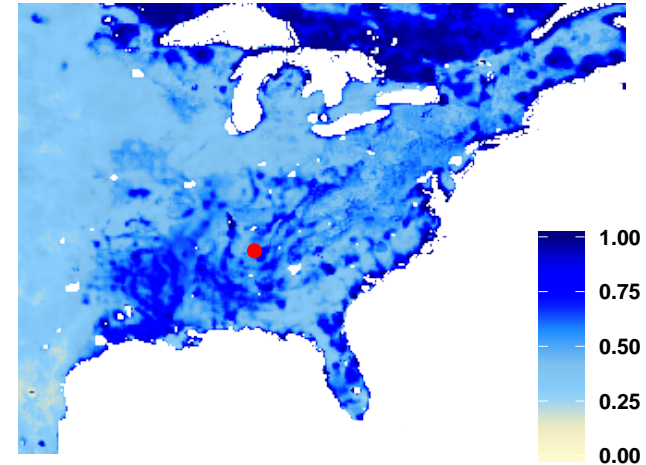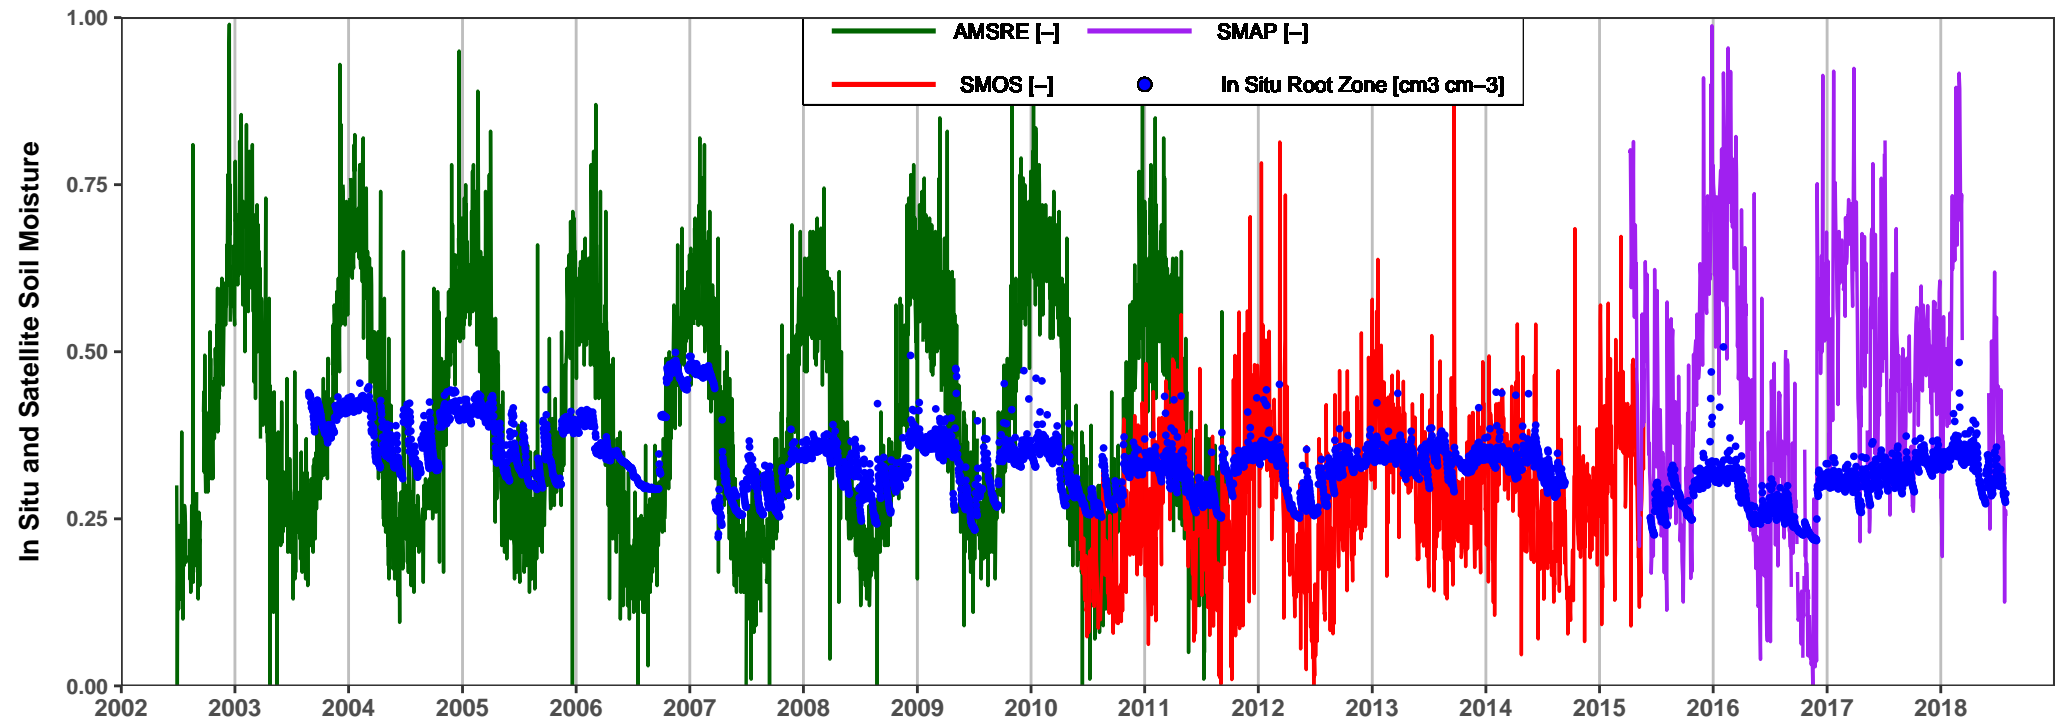



# Site: BroadAcres

## AMSRE Average

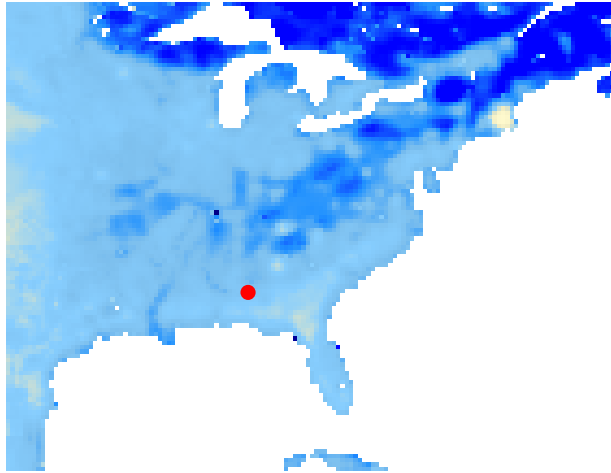

## SMOS Average

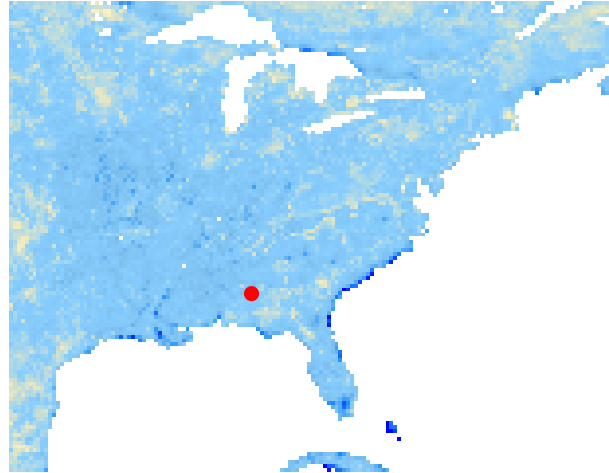

## SMAP Average

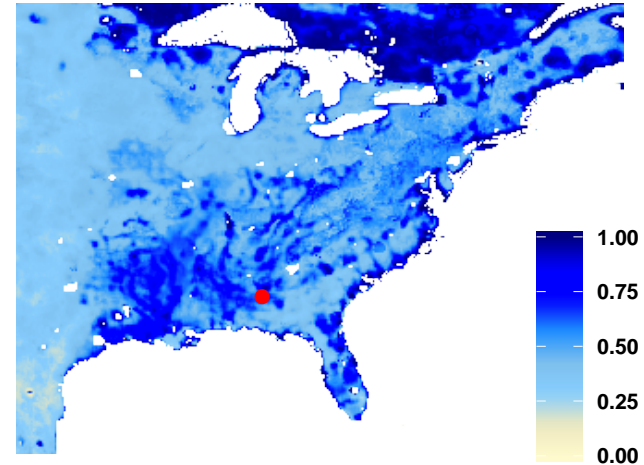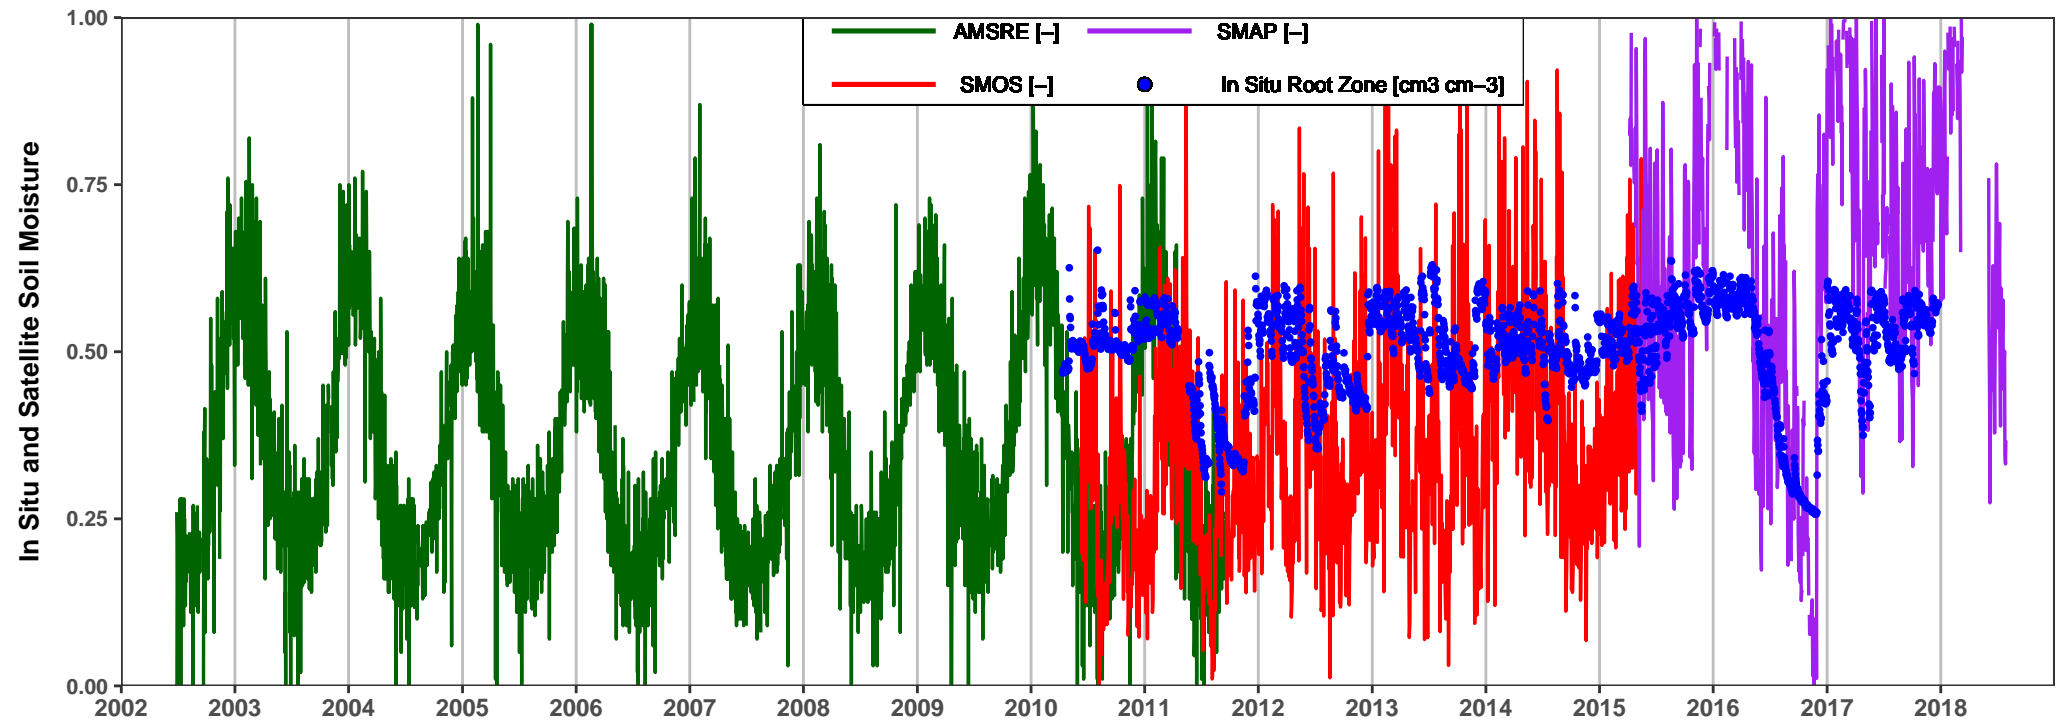

# Site: CrescentLakes

AMSRE Average

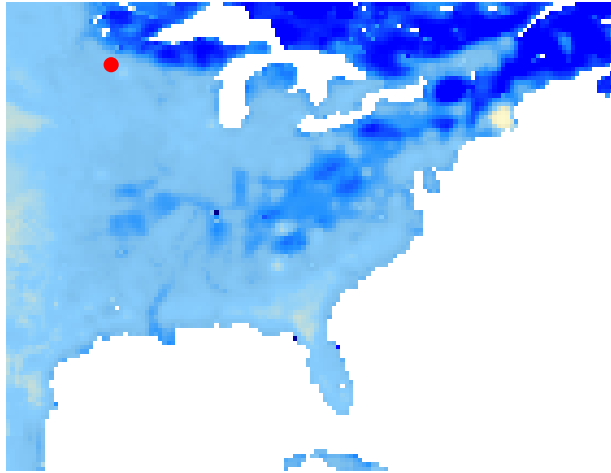

SMOS Average

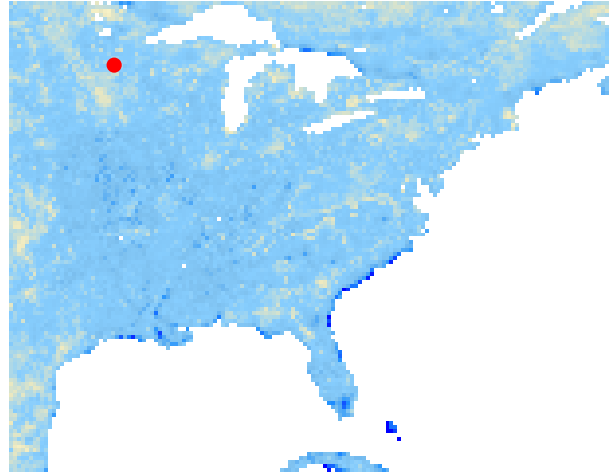

SMAP Average

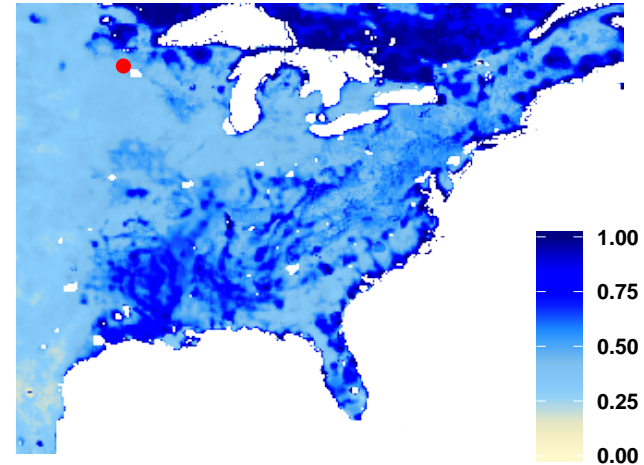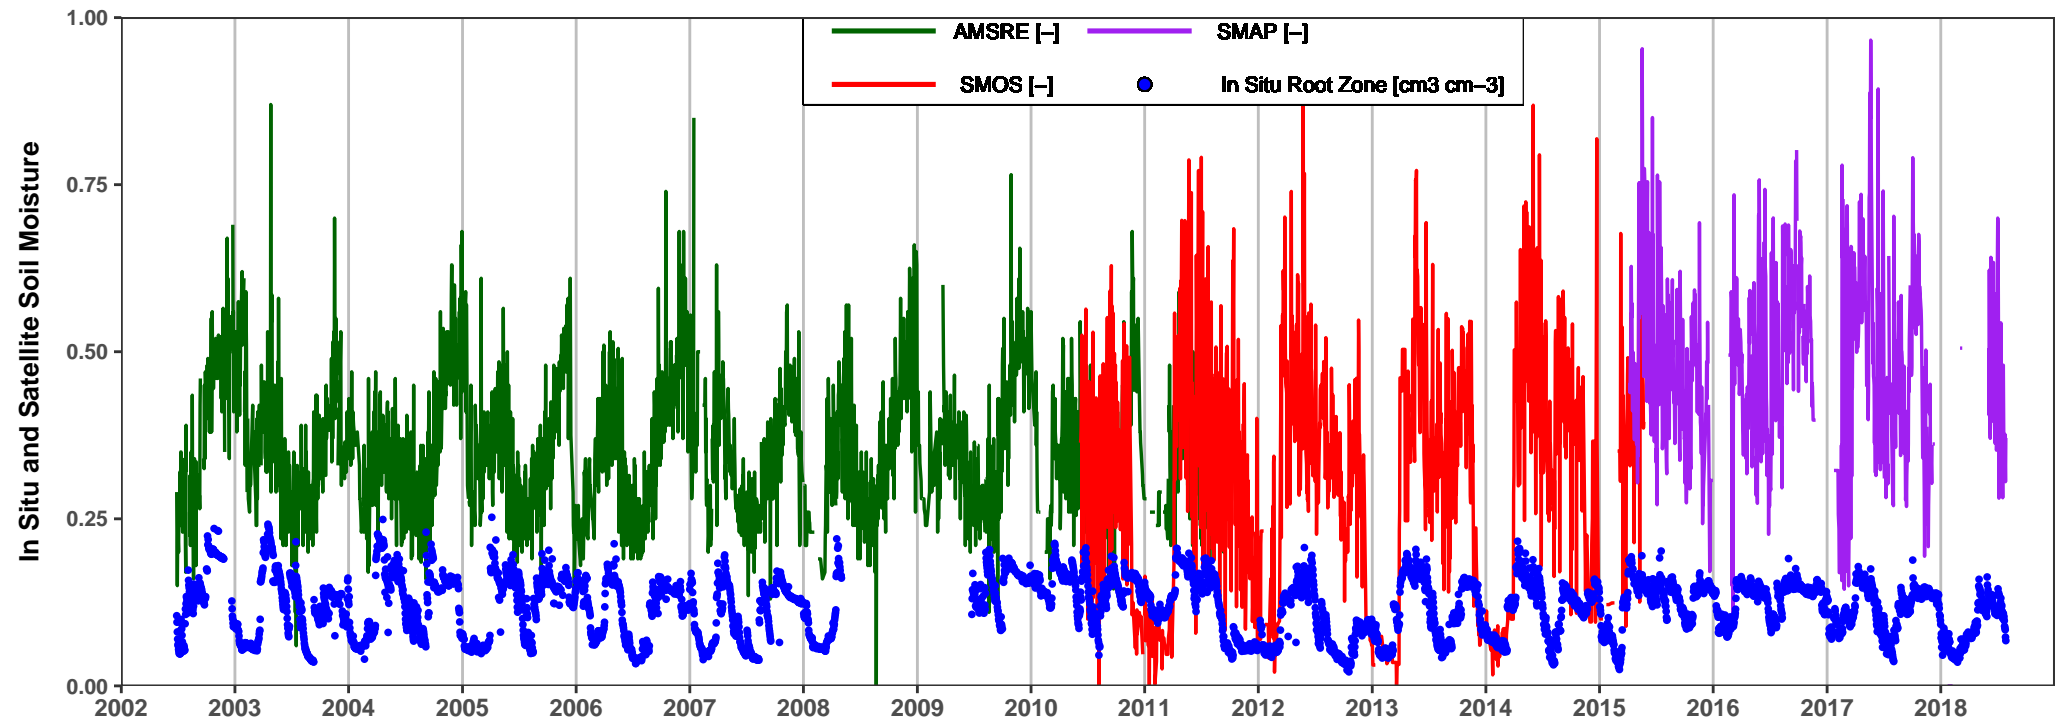

# Site: Cullman\_NAHRC

## AMSRE Average

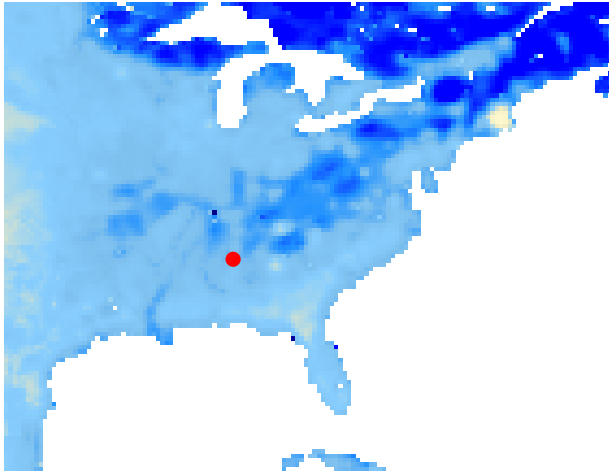

## SMOS Average

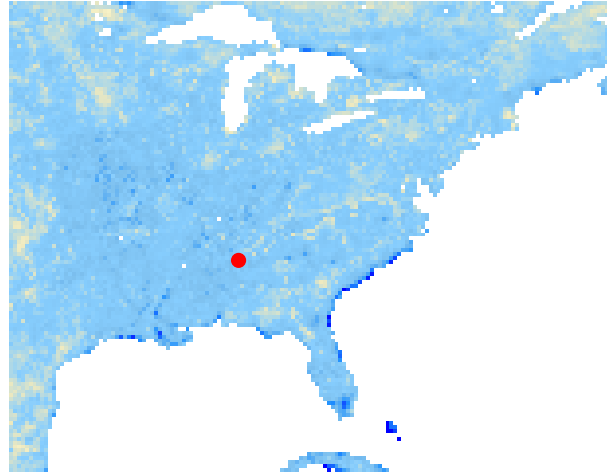

## SMAP Average

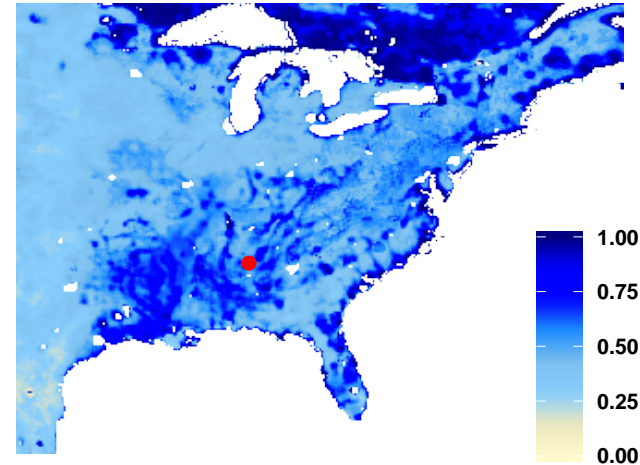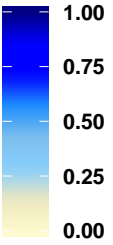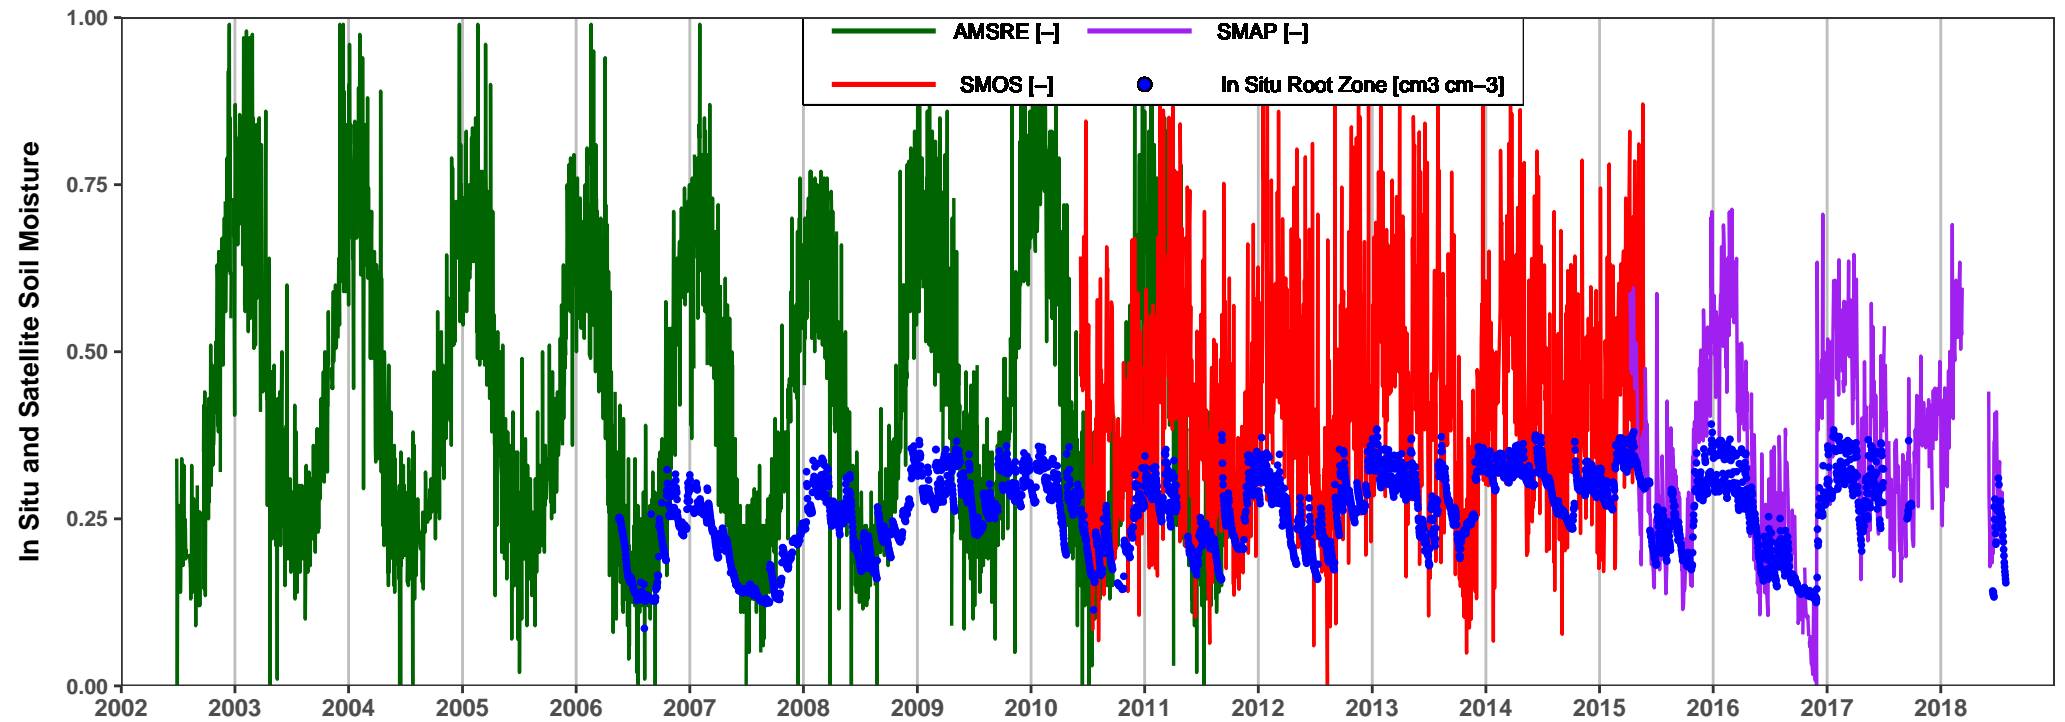

# Site: DeeRiverRanch

## AMSRE Average

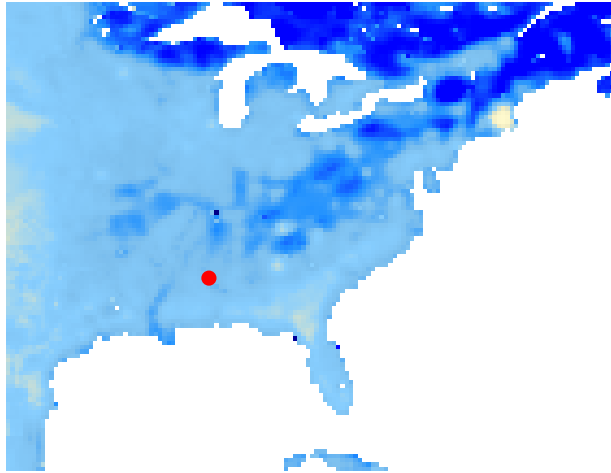

## SMOS Average

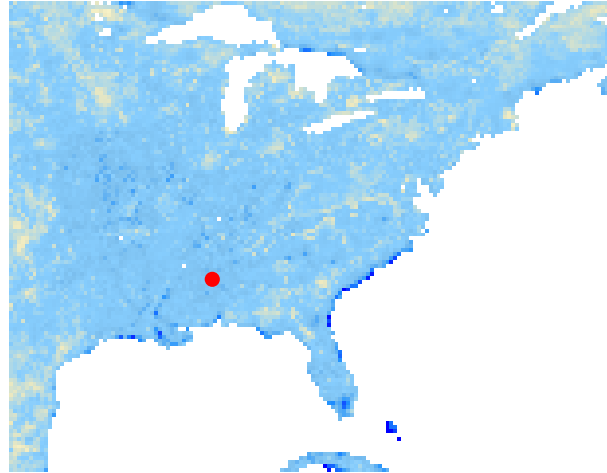

## SMAP Average

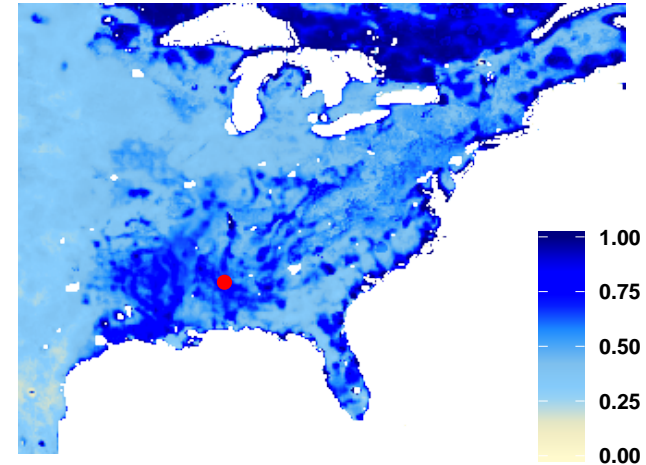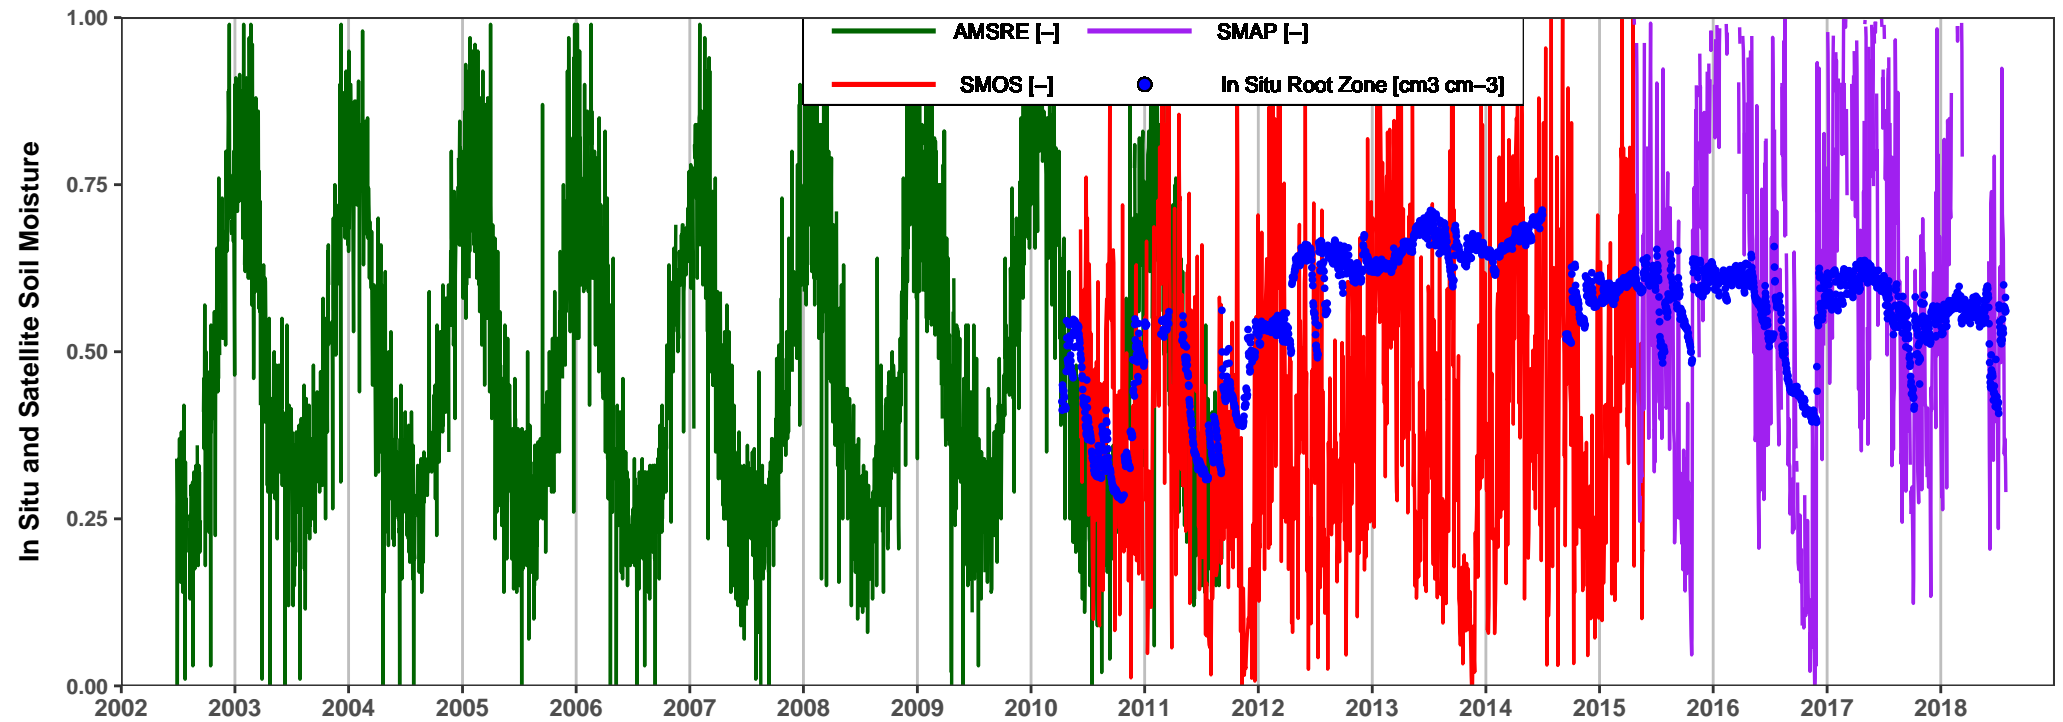

# Site: Dexter

## AMSRE Average

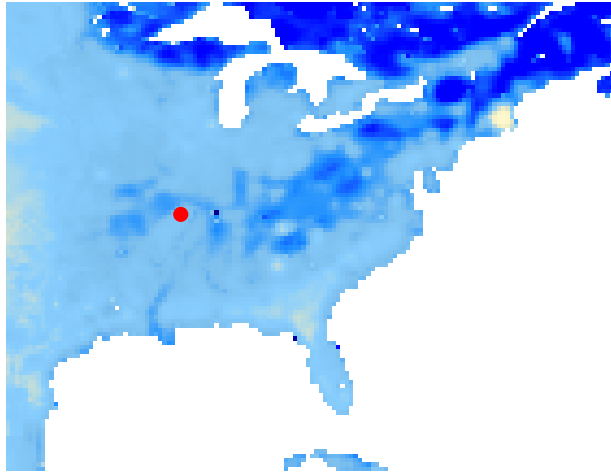

## SMOS Average

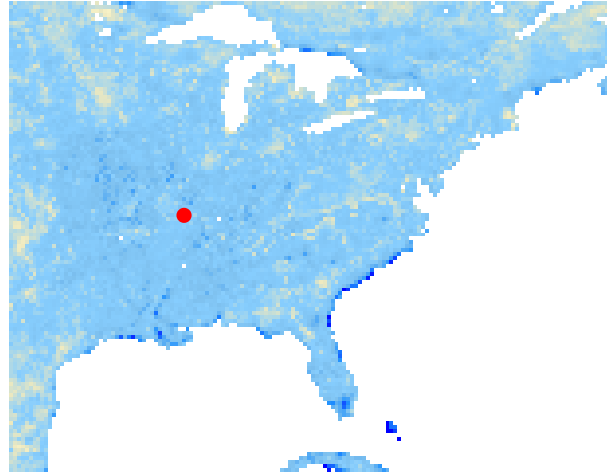

## SMAP Average

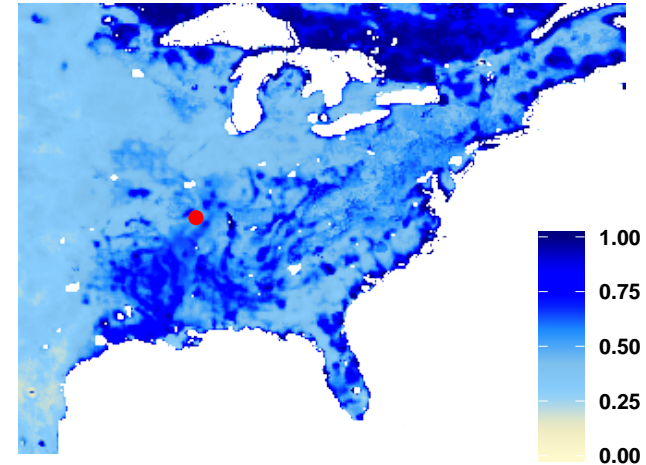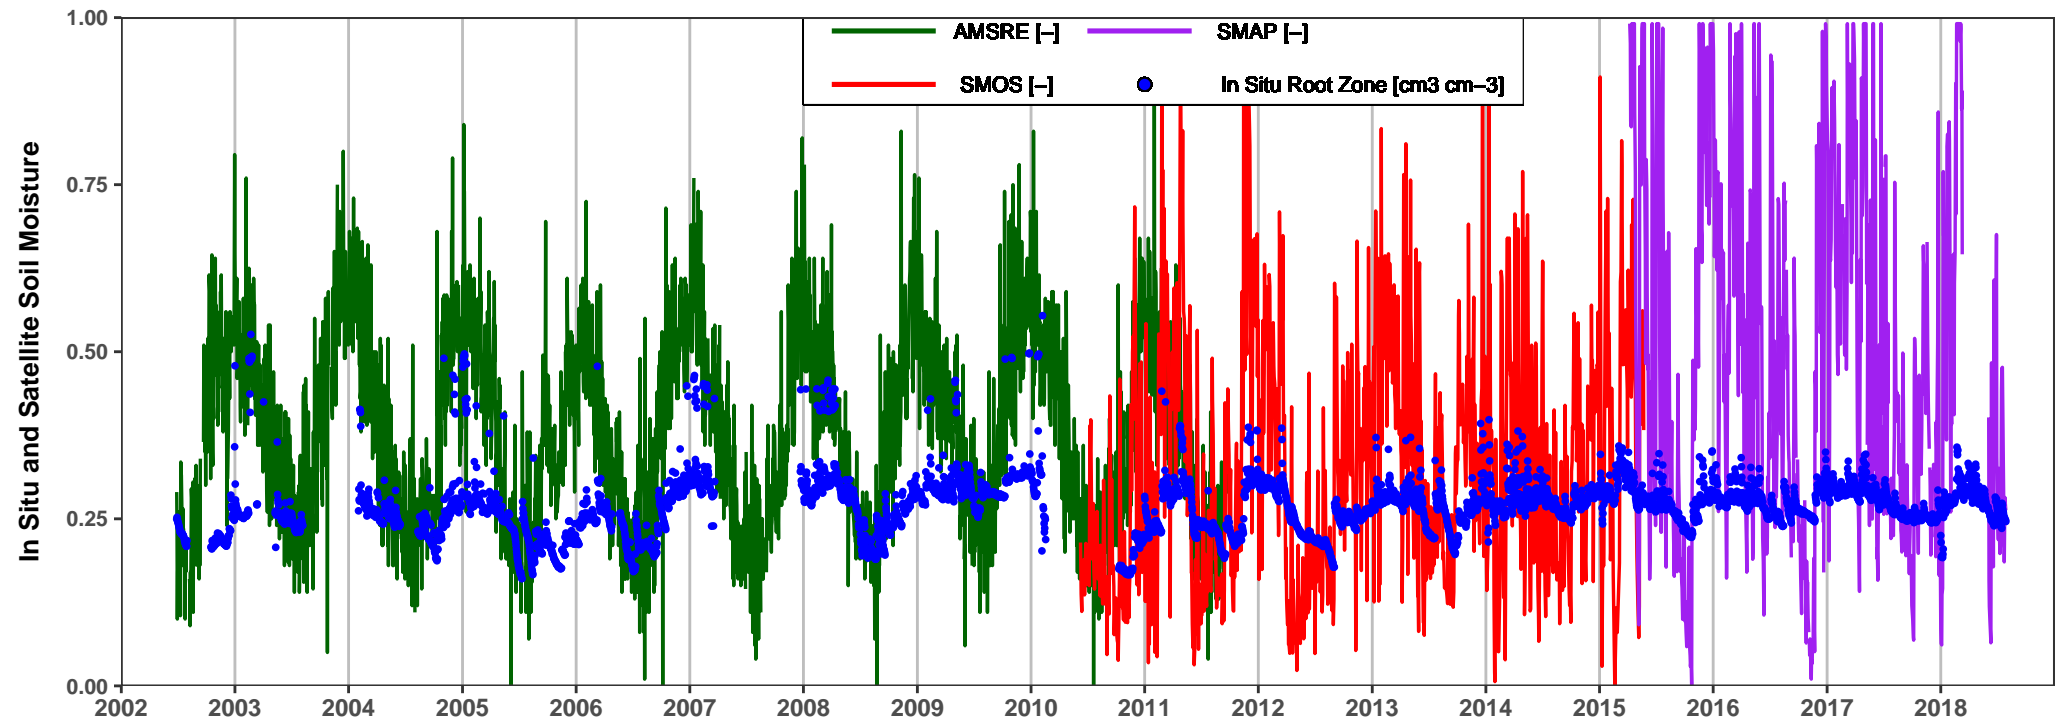

## Site: EastviewFarm

AMSRE Average

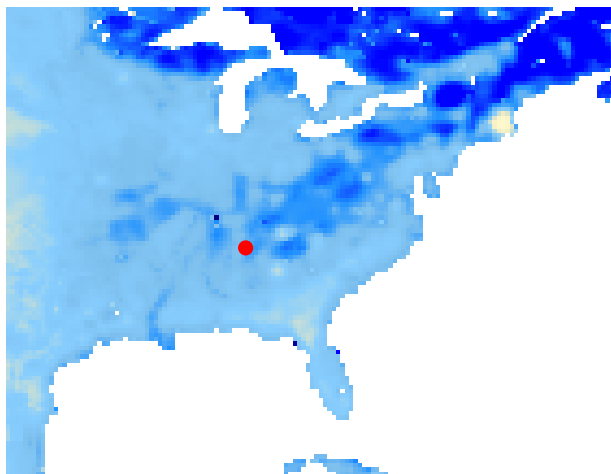

SMOS Average

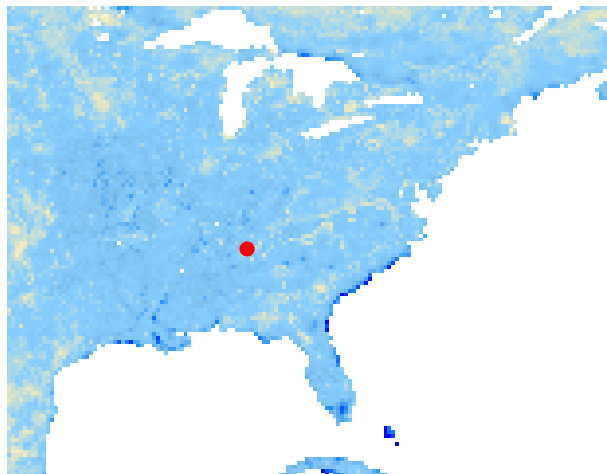

SMAP Average

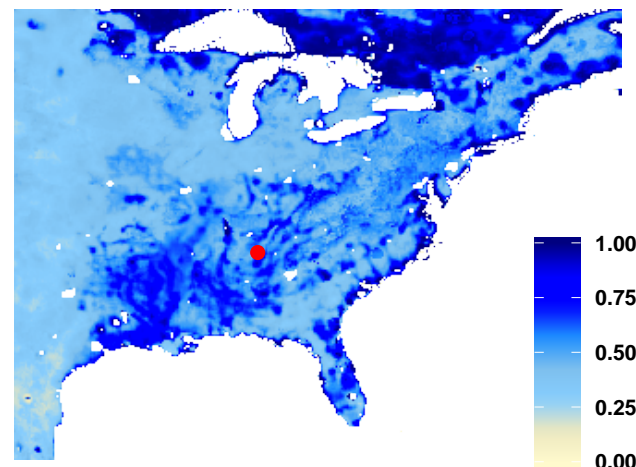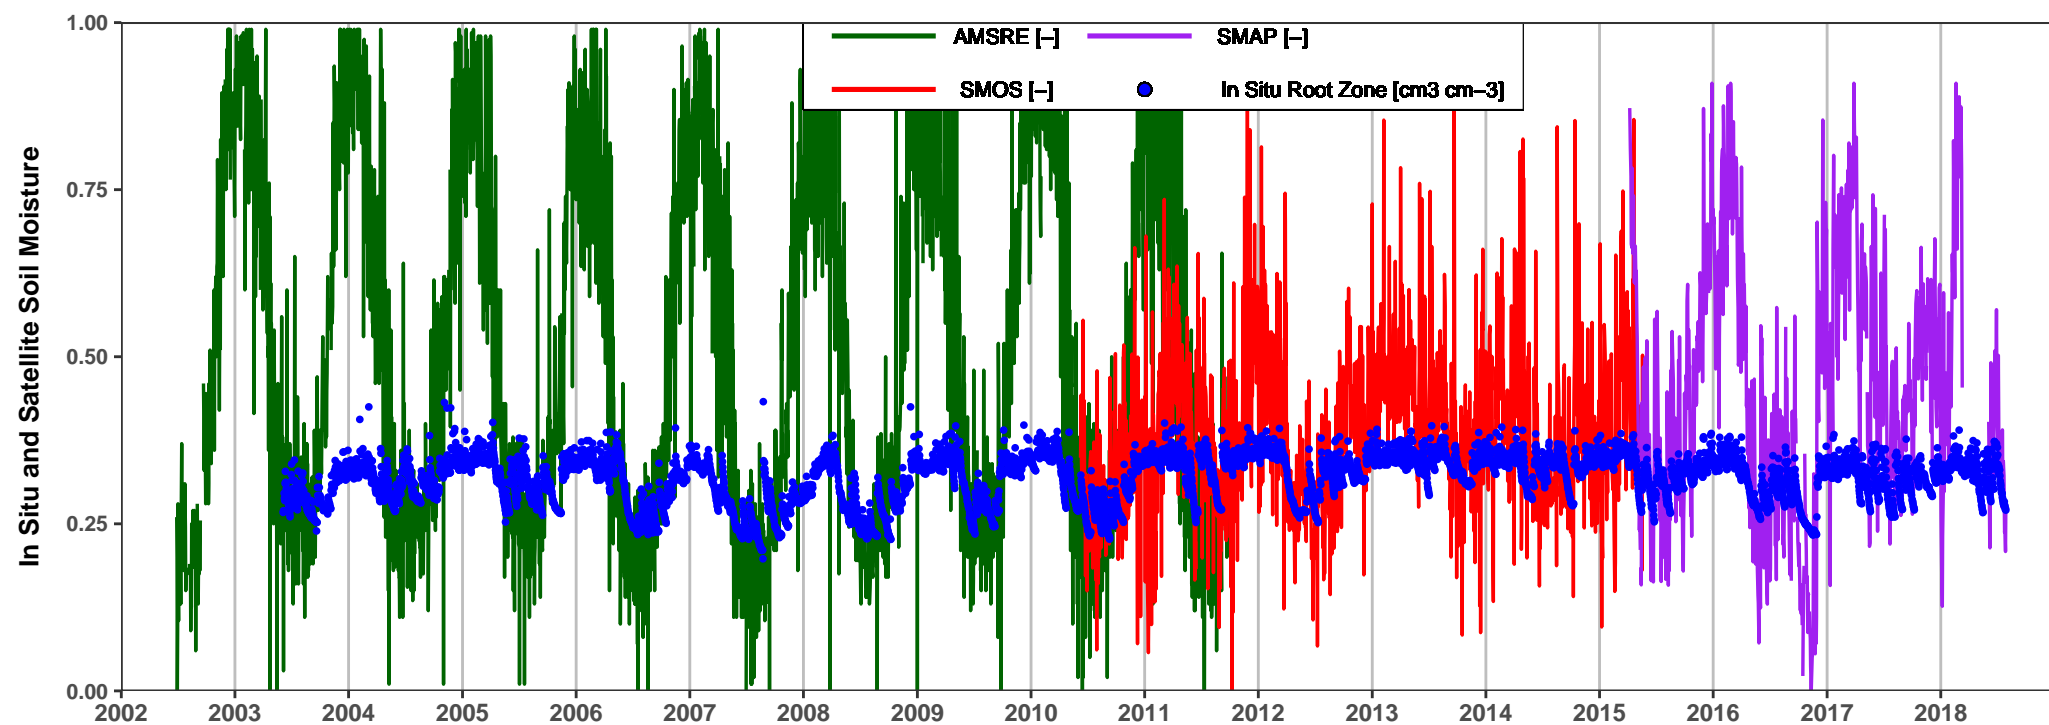



# Site: ElsberryPMC

## AMSRE Average

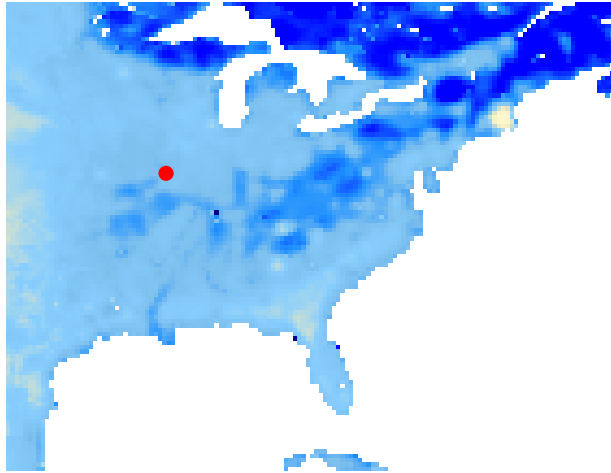

## SMOS Average

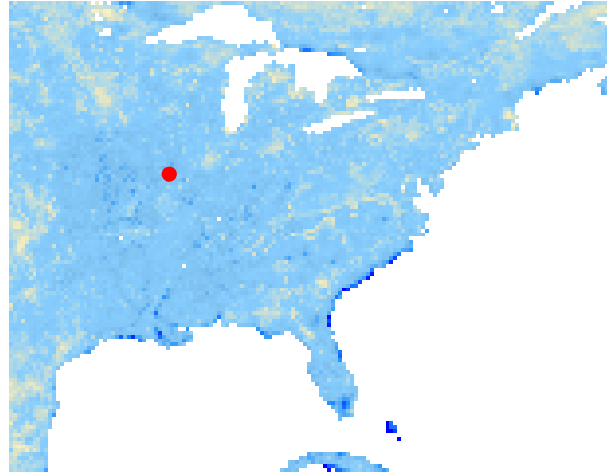

## SMAP Average

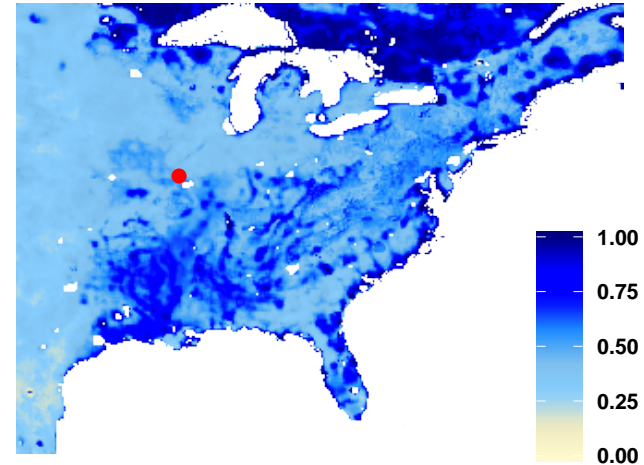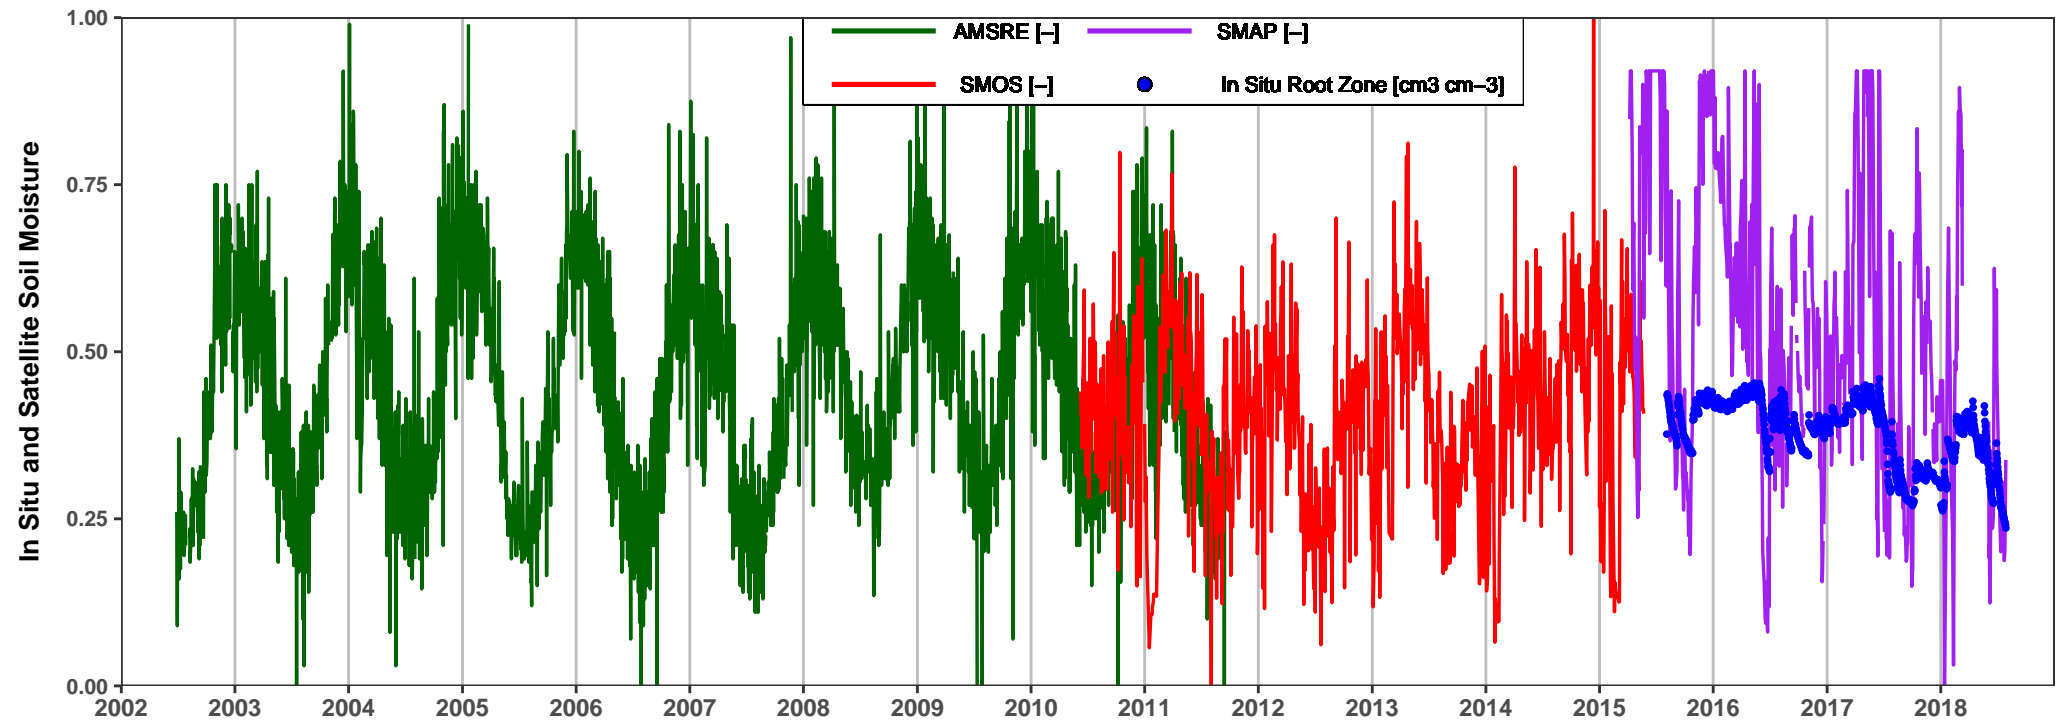

# Site: Geneva1

## AMSRE Average

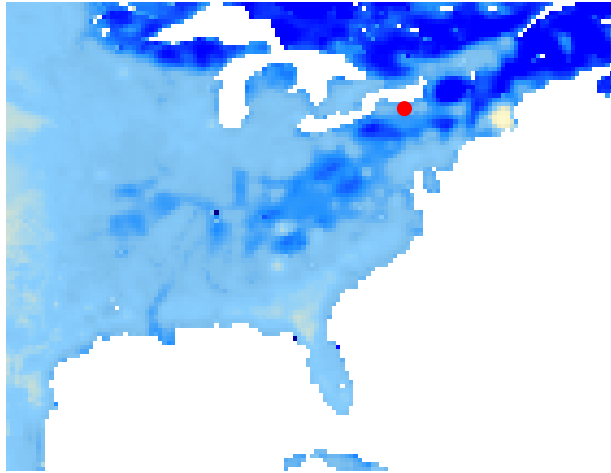

## SMOS Average

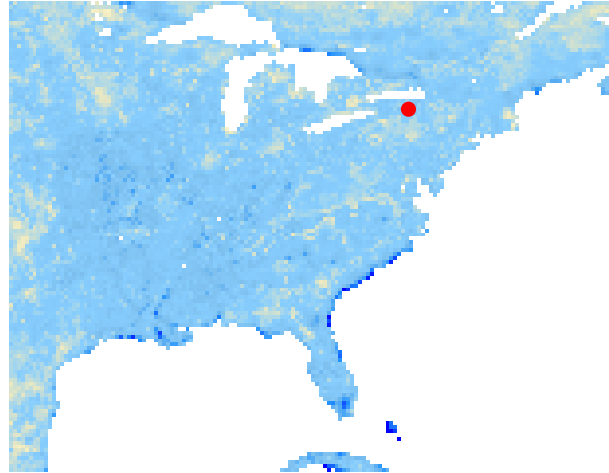

## SMAP Average

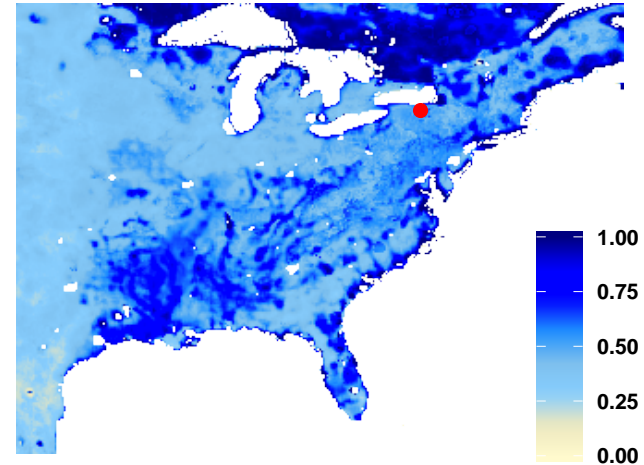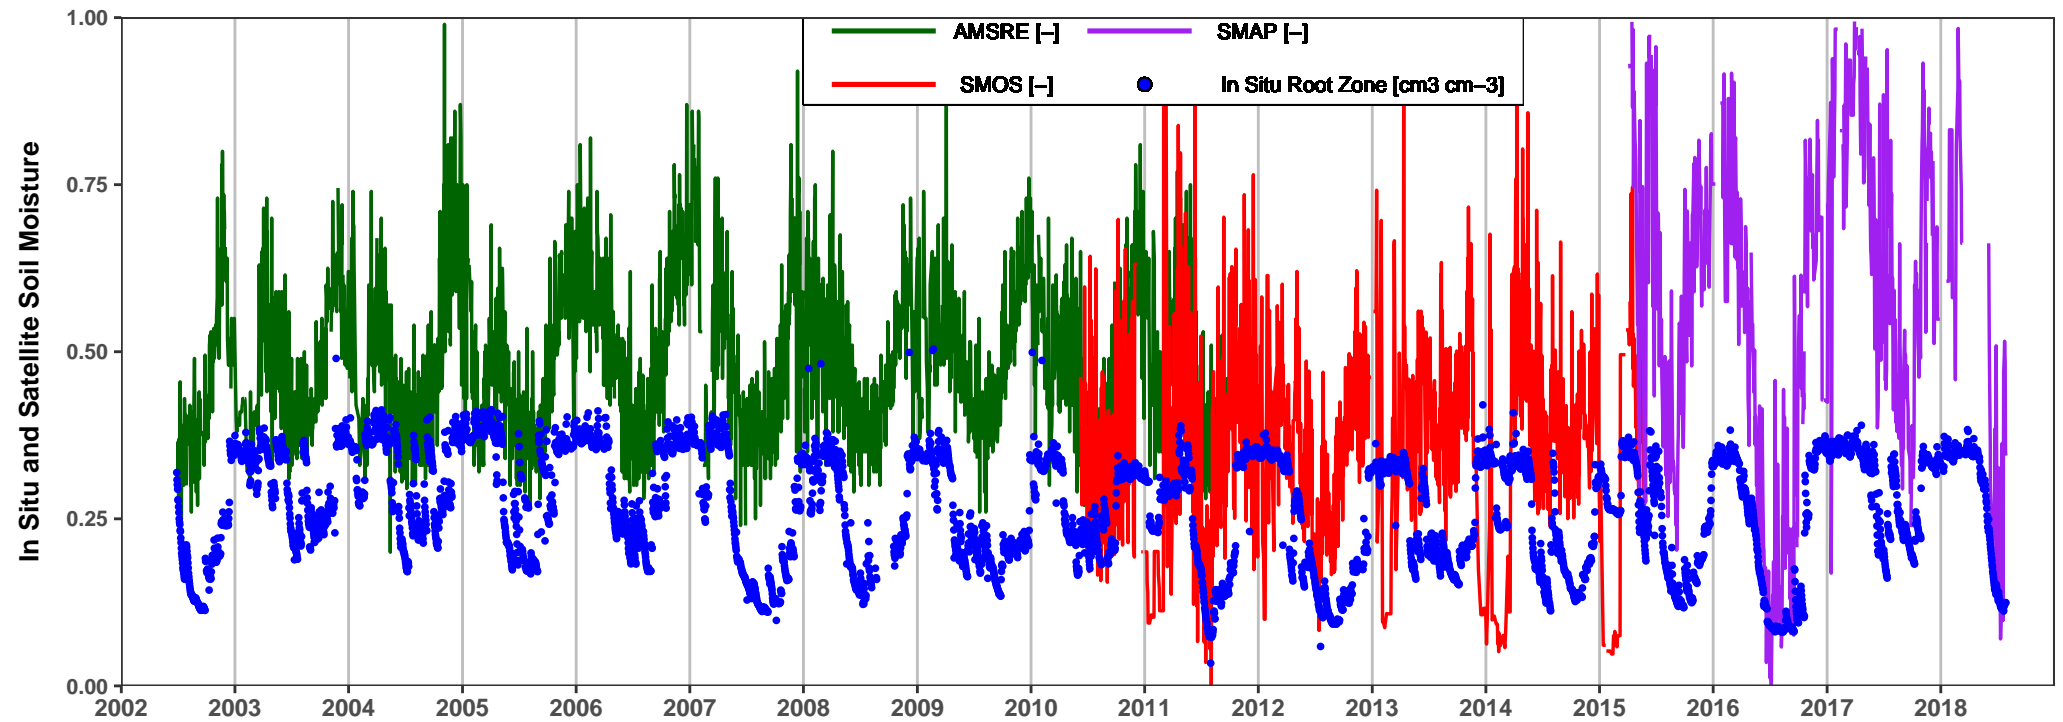

# Site: GlacialRidge

## AMSRE Average

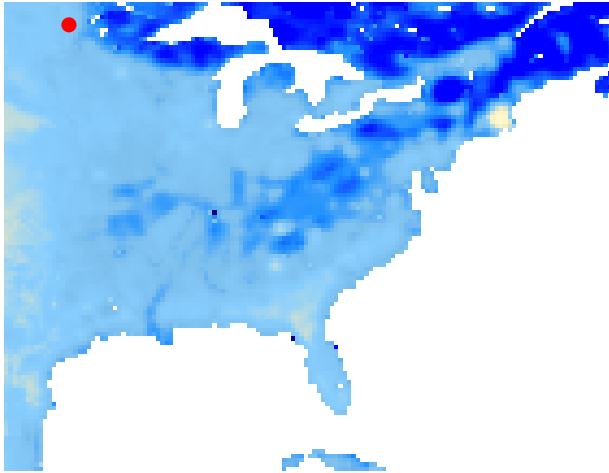

## SMOS Average

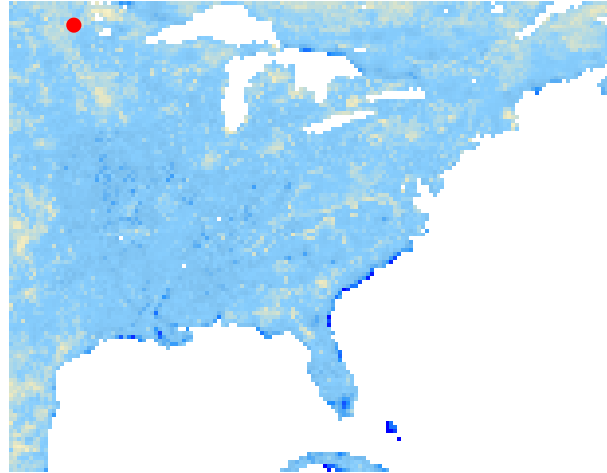

## SMAP Average

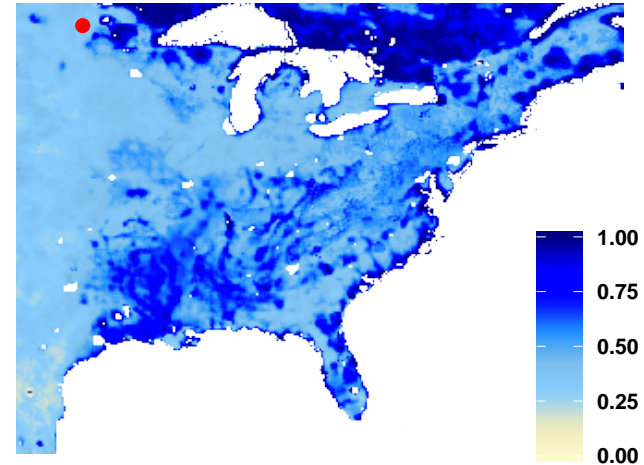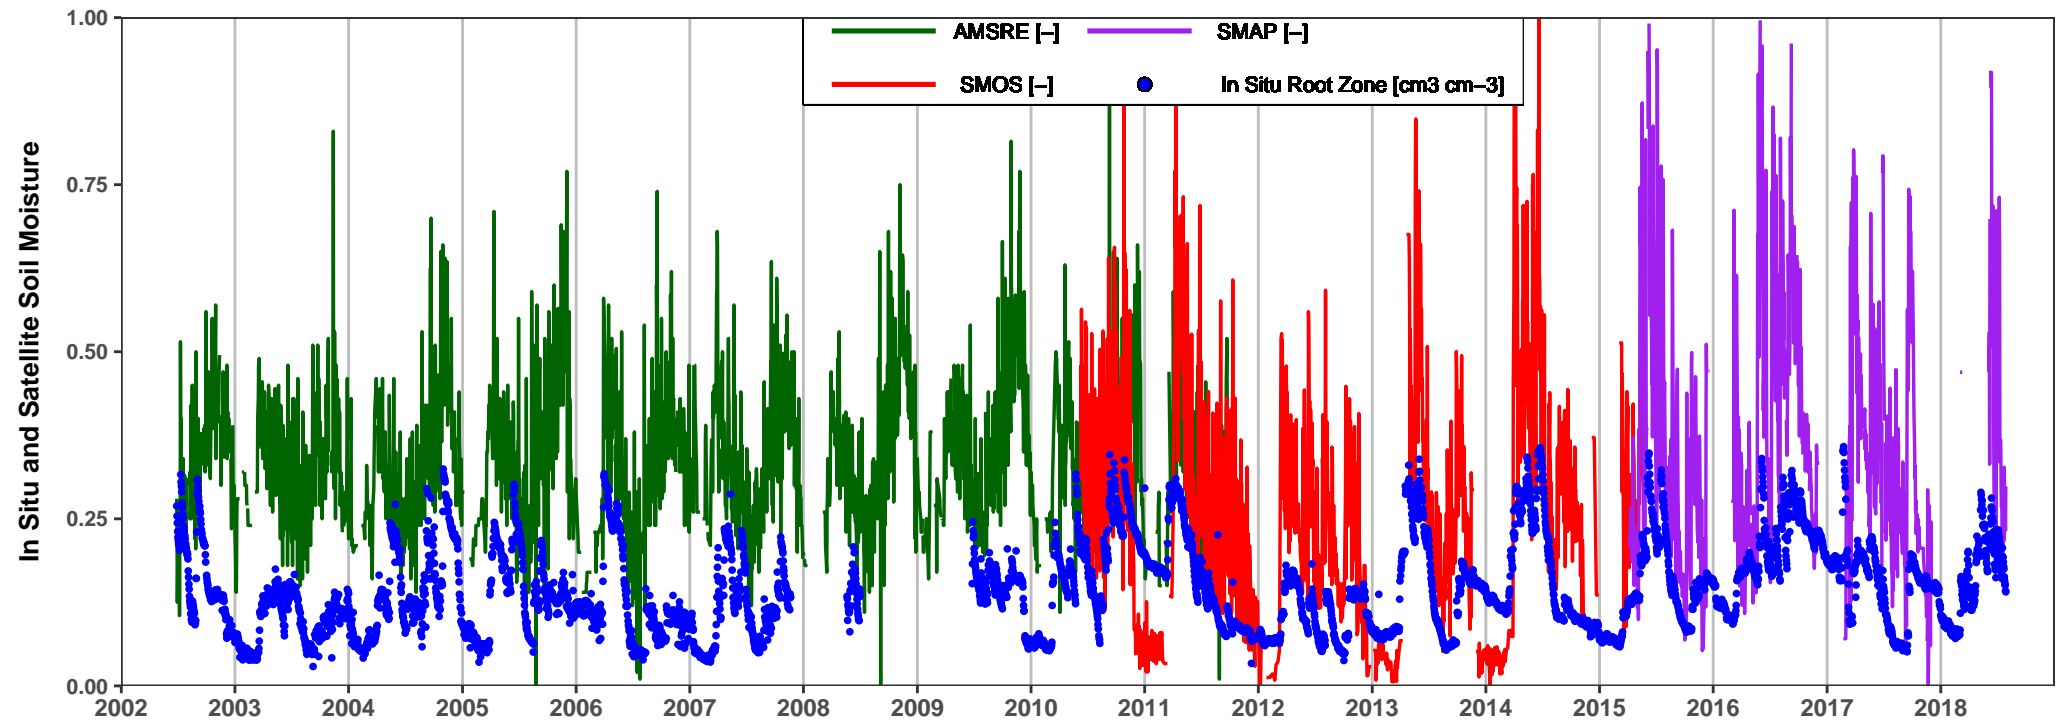

# Site: GoodwinCkPasture

AMSRE Average

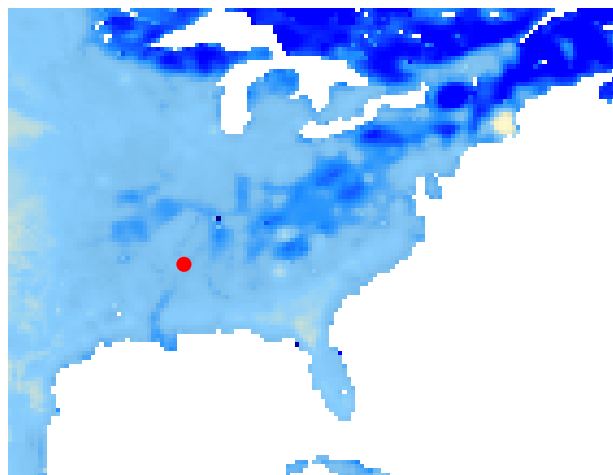

SMOS Average

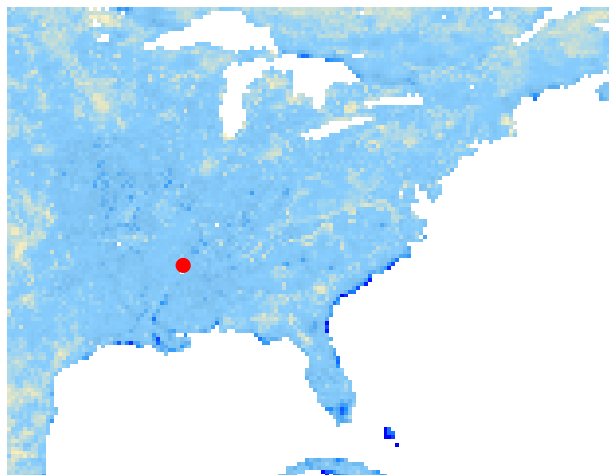

SMAP Average

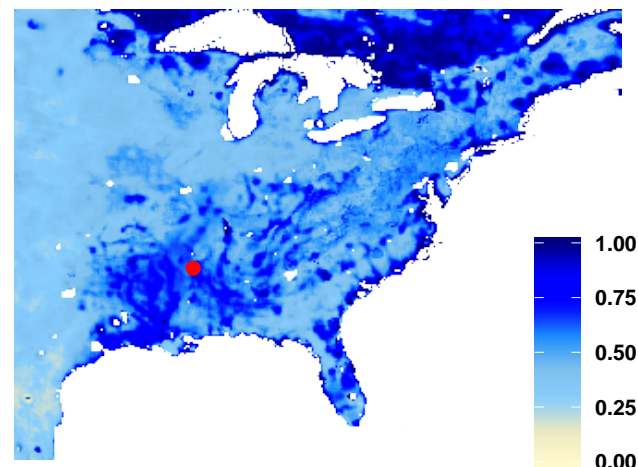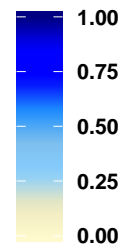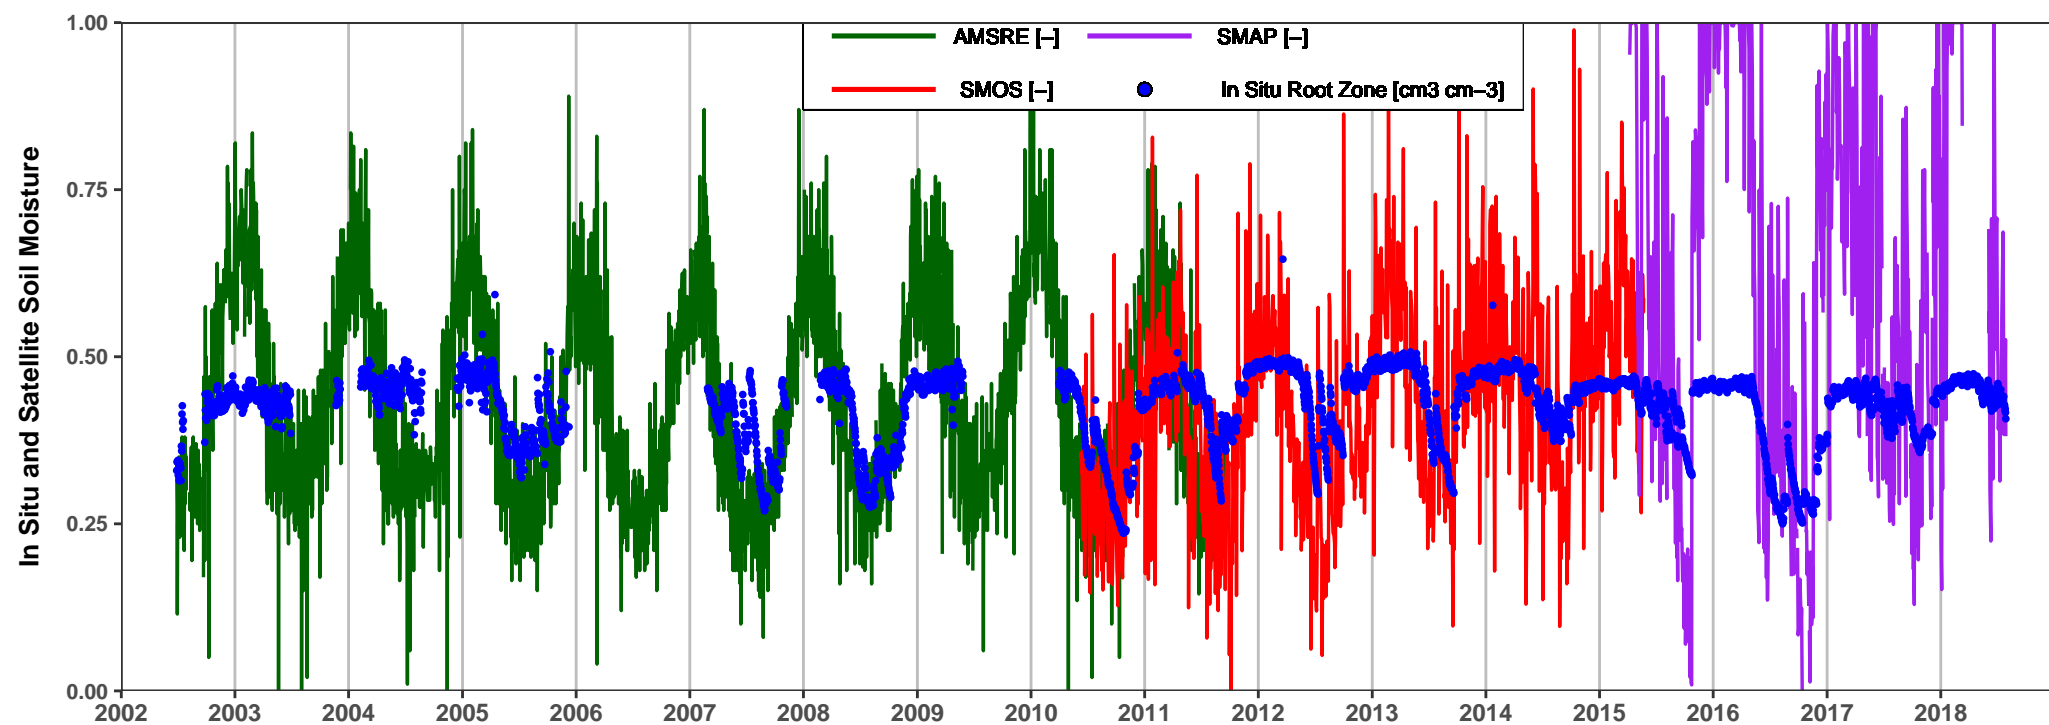

# Site: GoodwinCkTimber

AMSRE Average

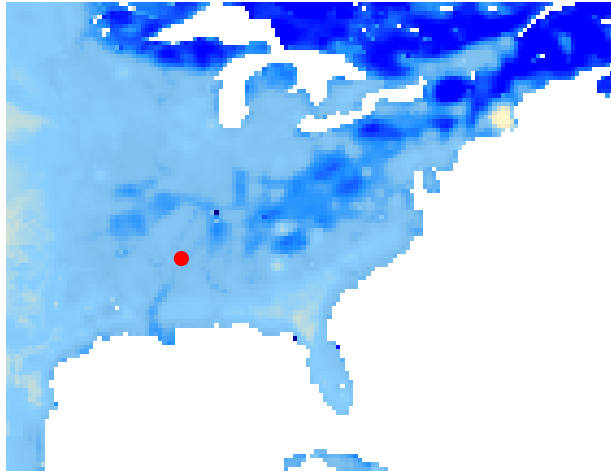

SMOS Average

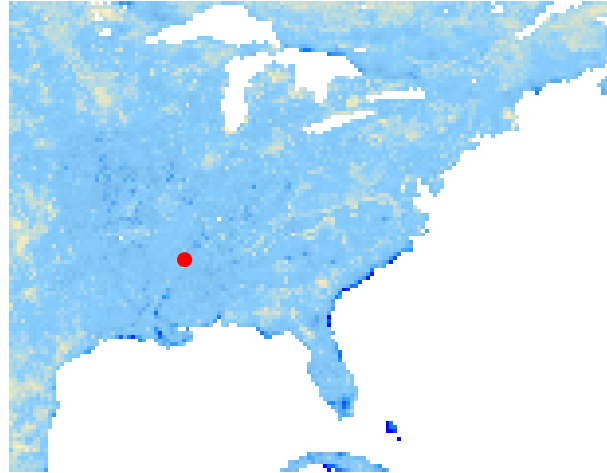

SMAP Average

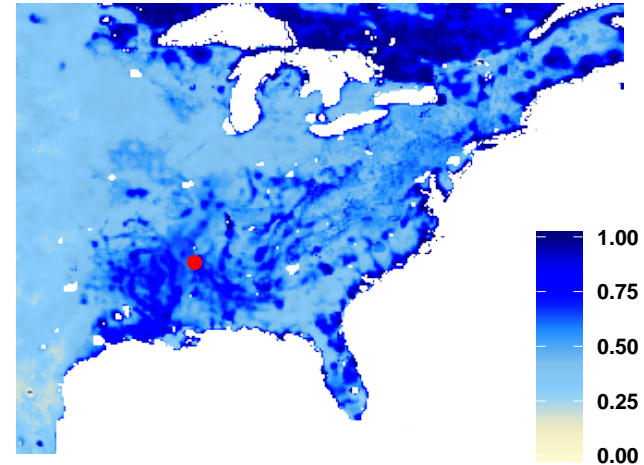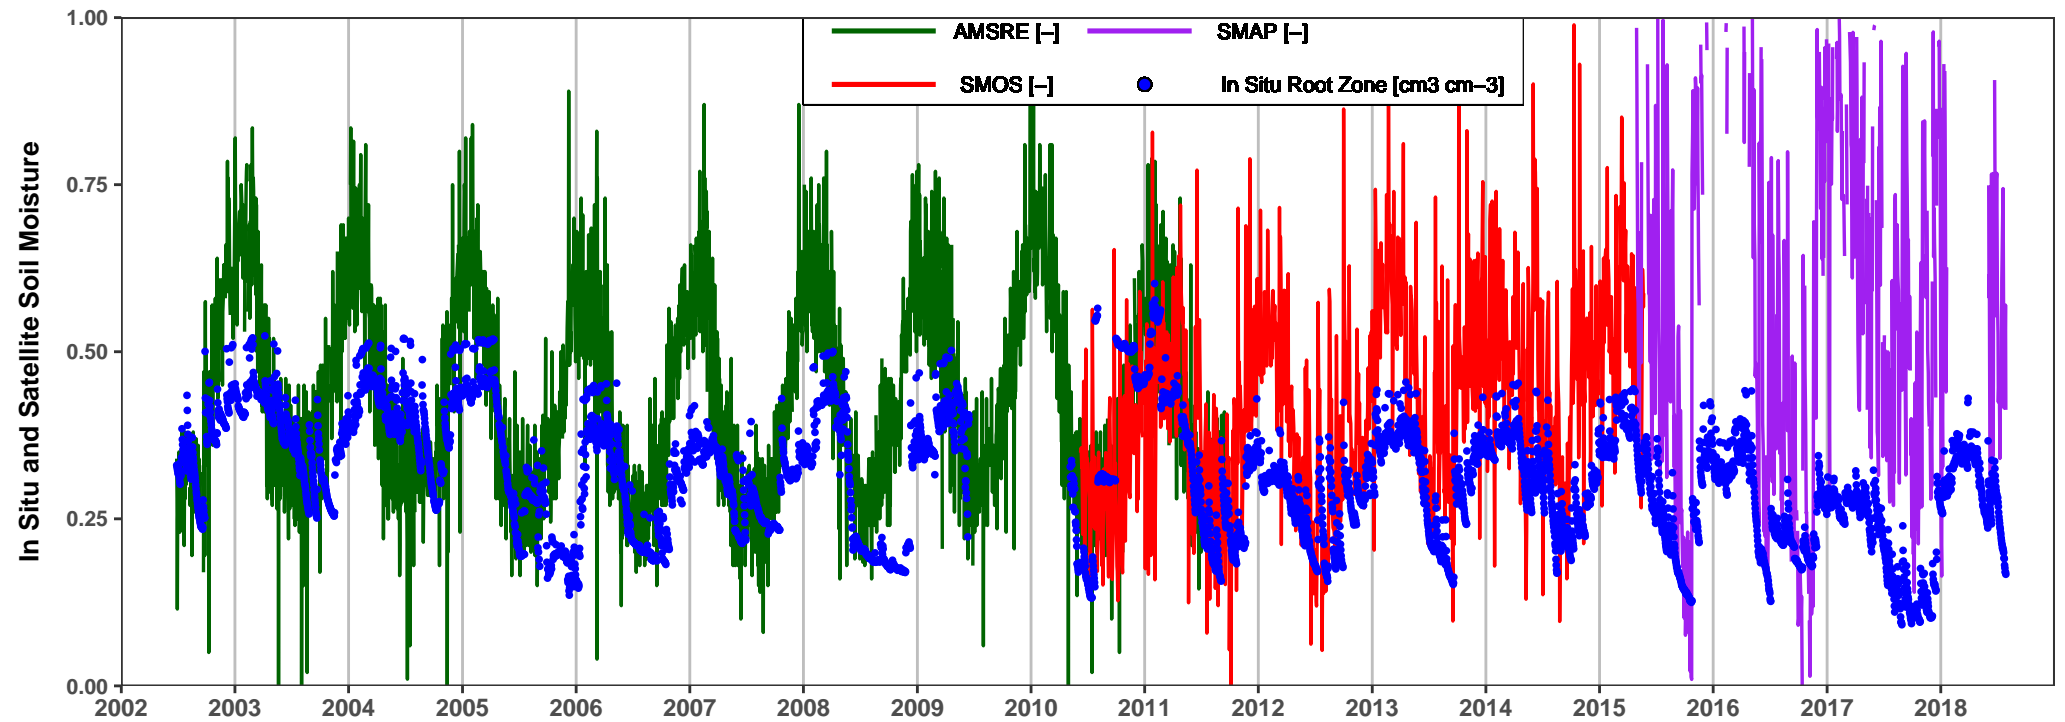

# Site: Hodges

## AMSRE Average

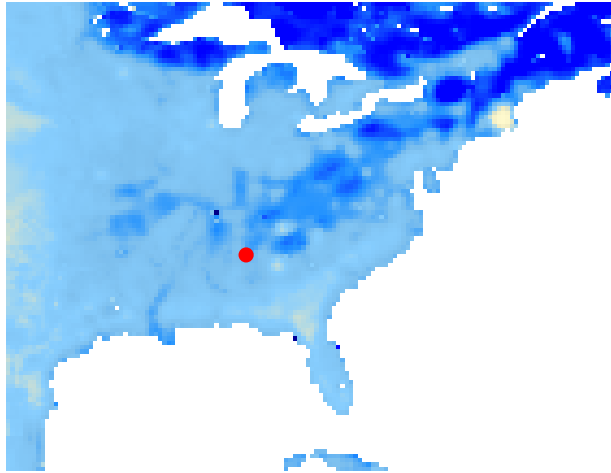

## SMOS Average

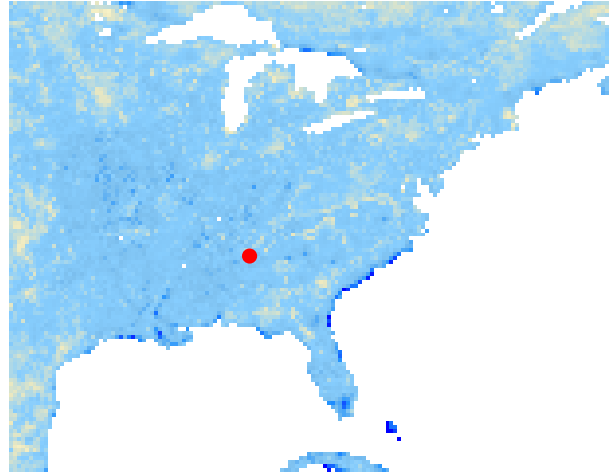

## SMAP Average

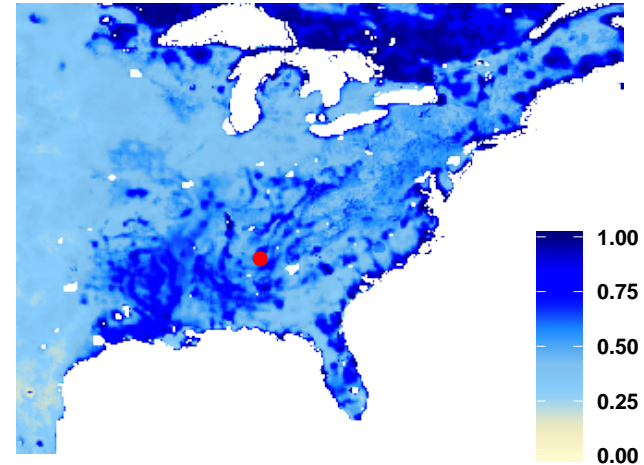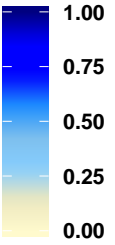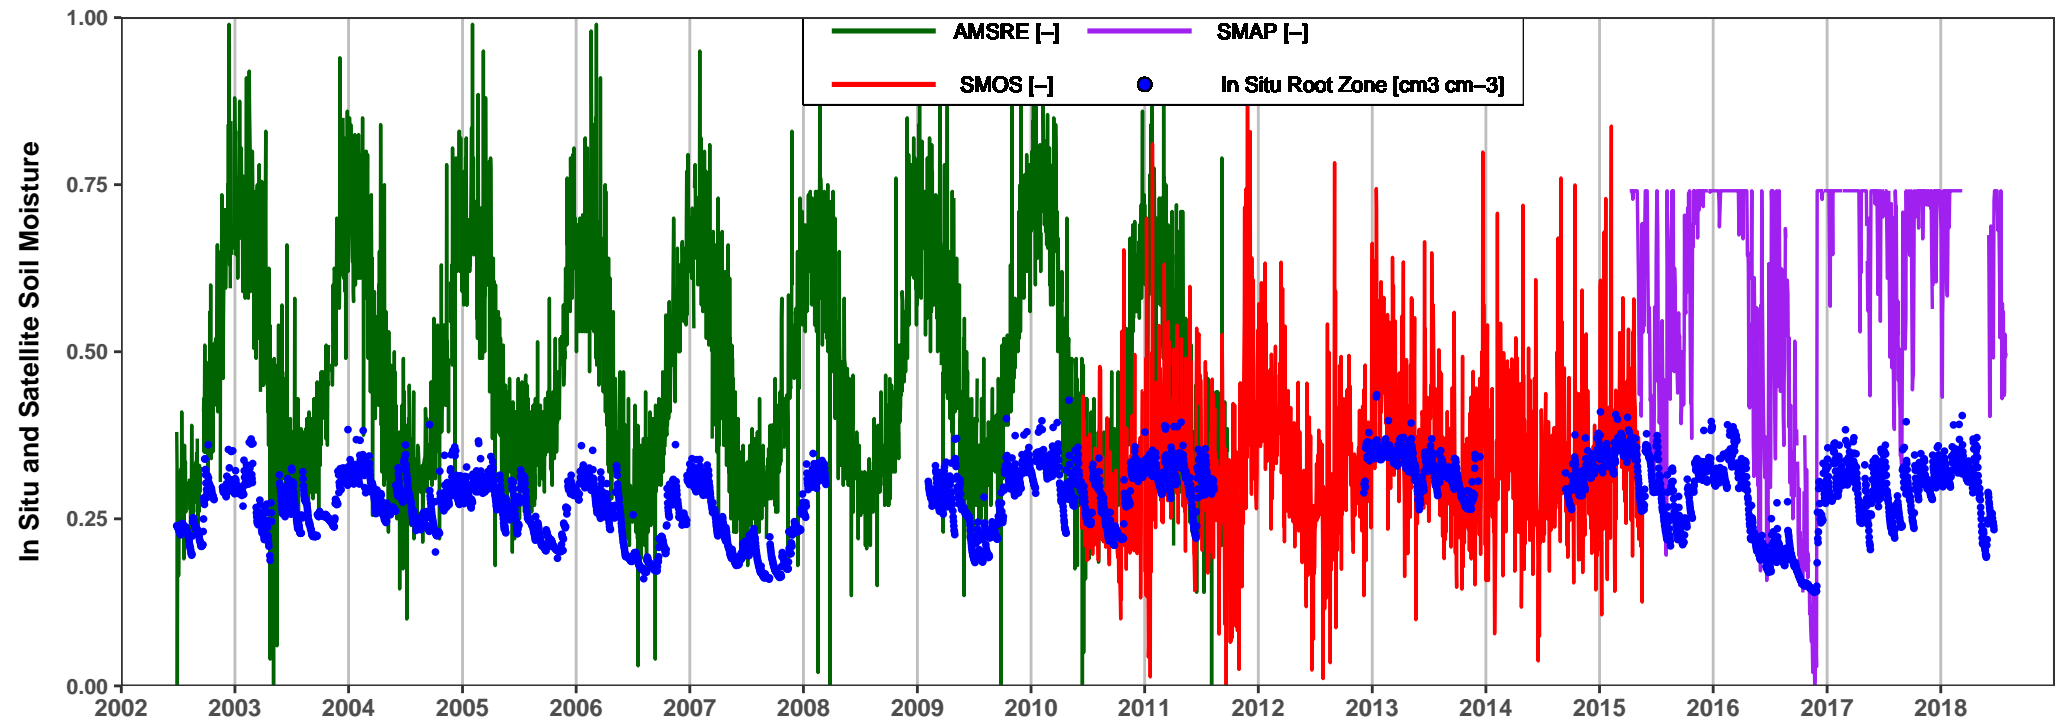



# Site: HubbardBrook

## AMSRE Average

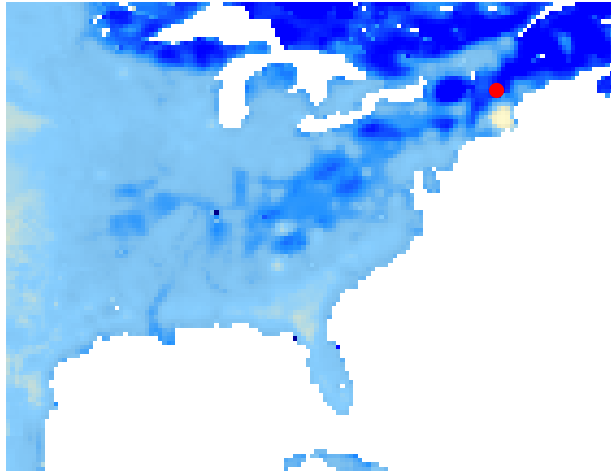

## SMOS Average

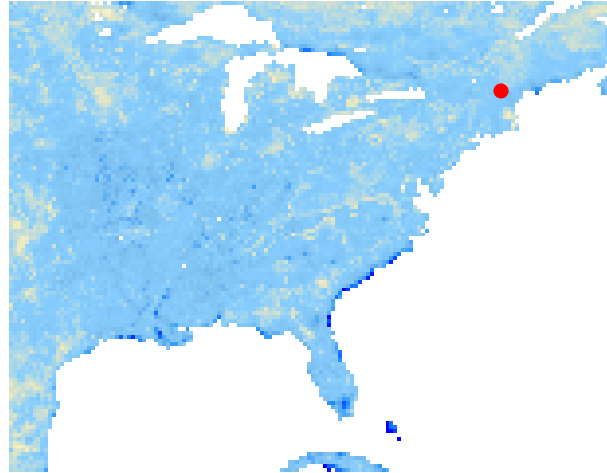

## SMAP Average

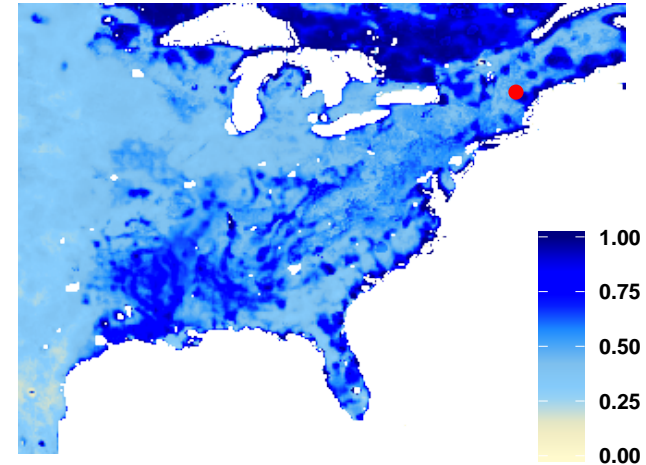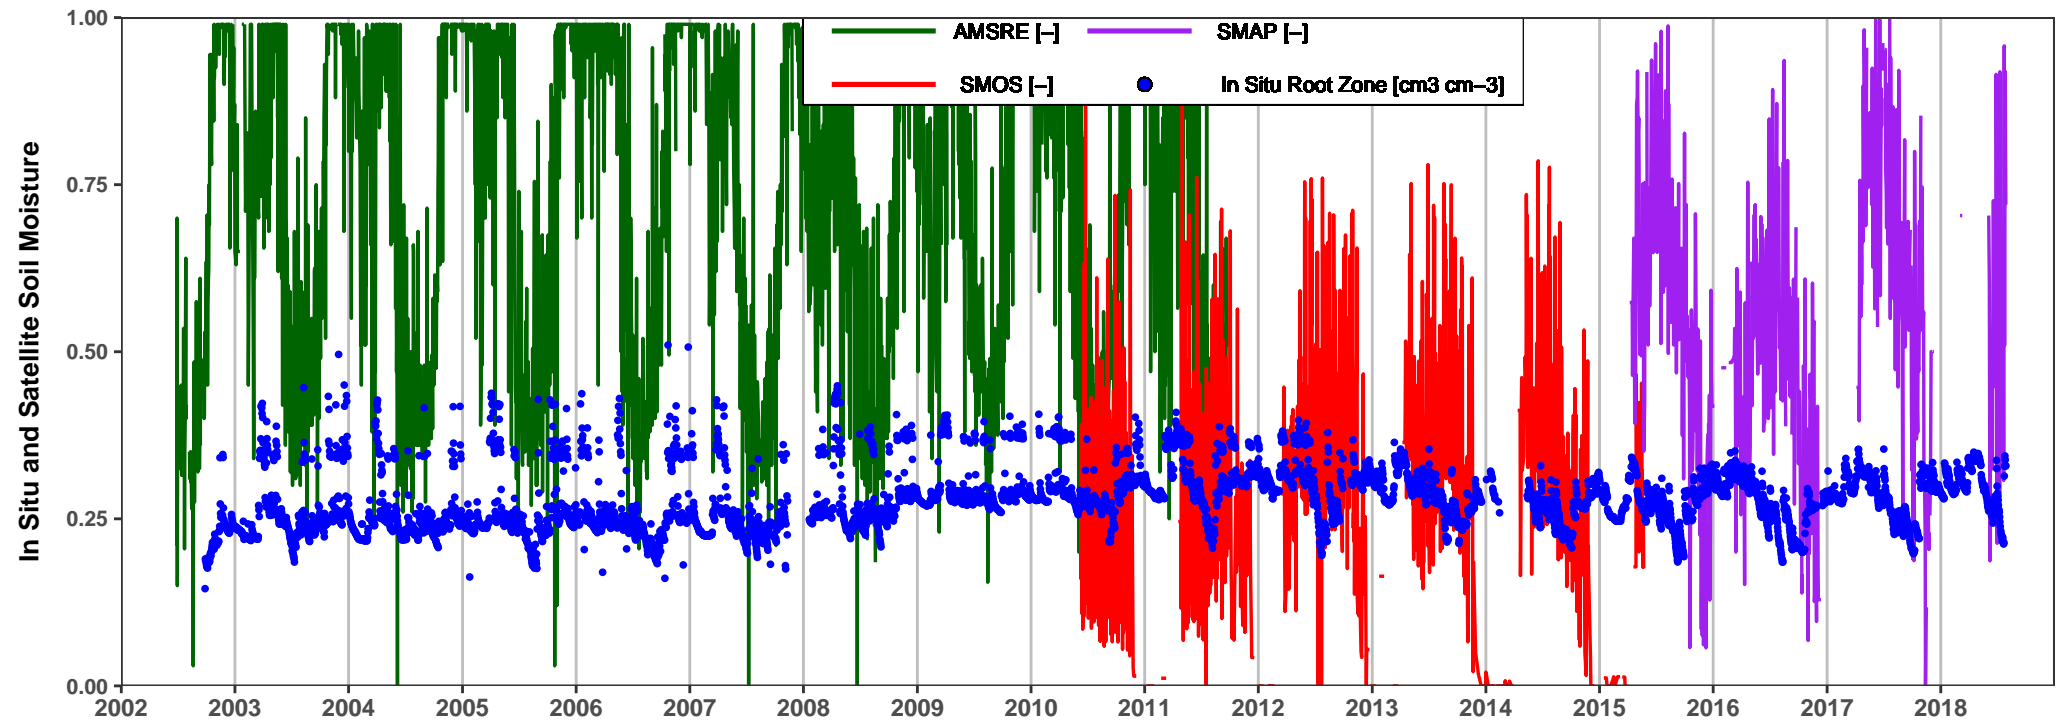

# Site: JournaganRanch

AMSRE Average

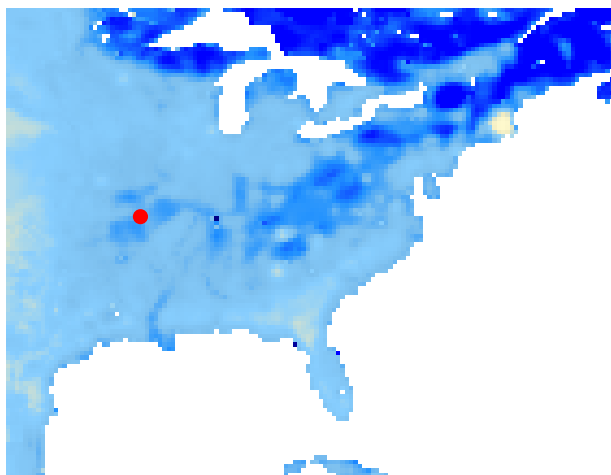

SMOS Average

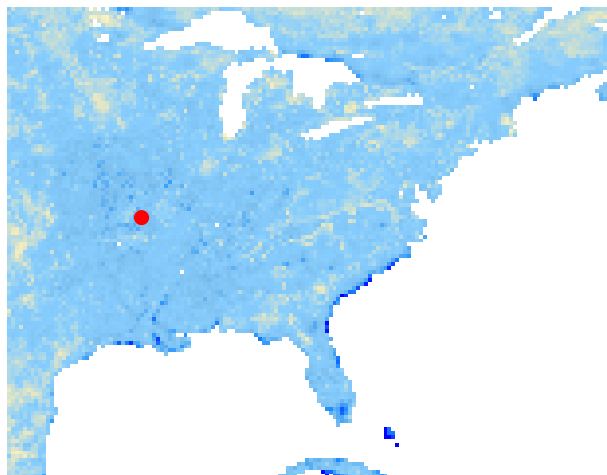

SMAP Average

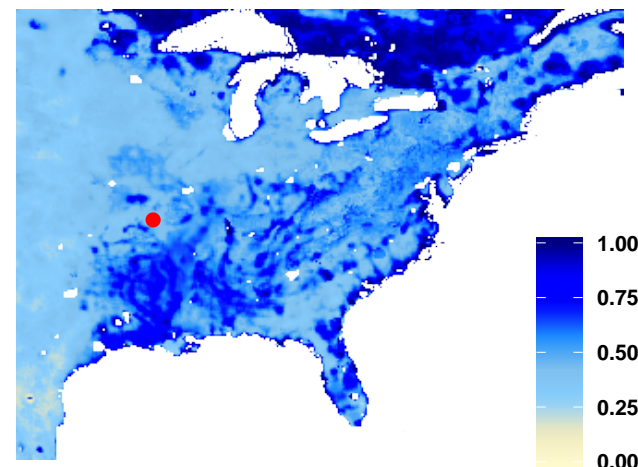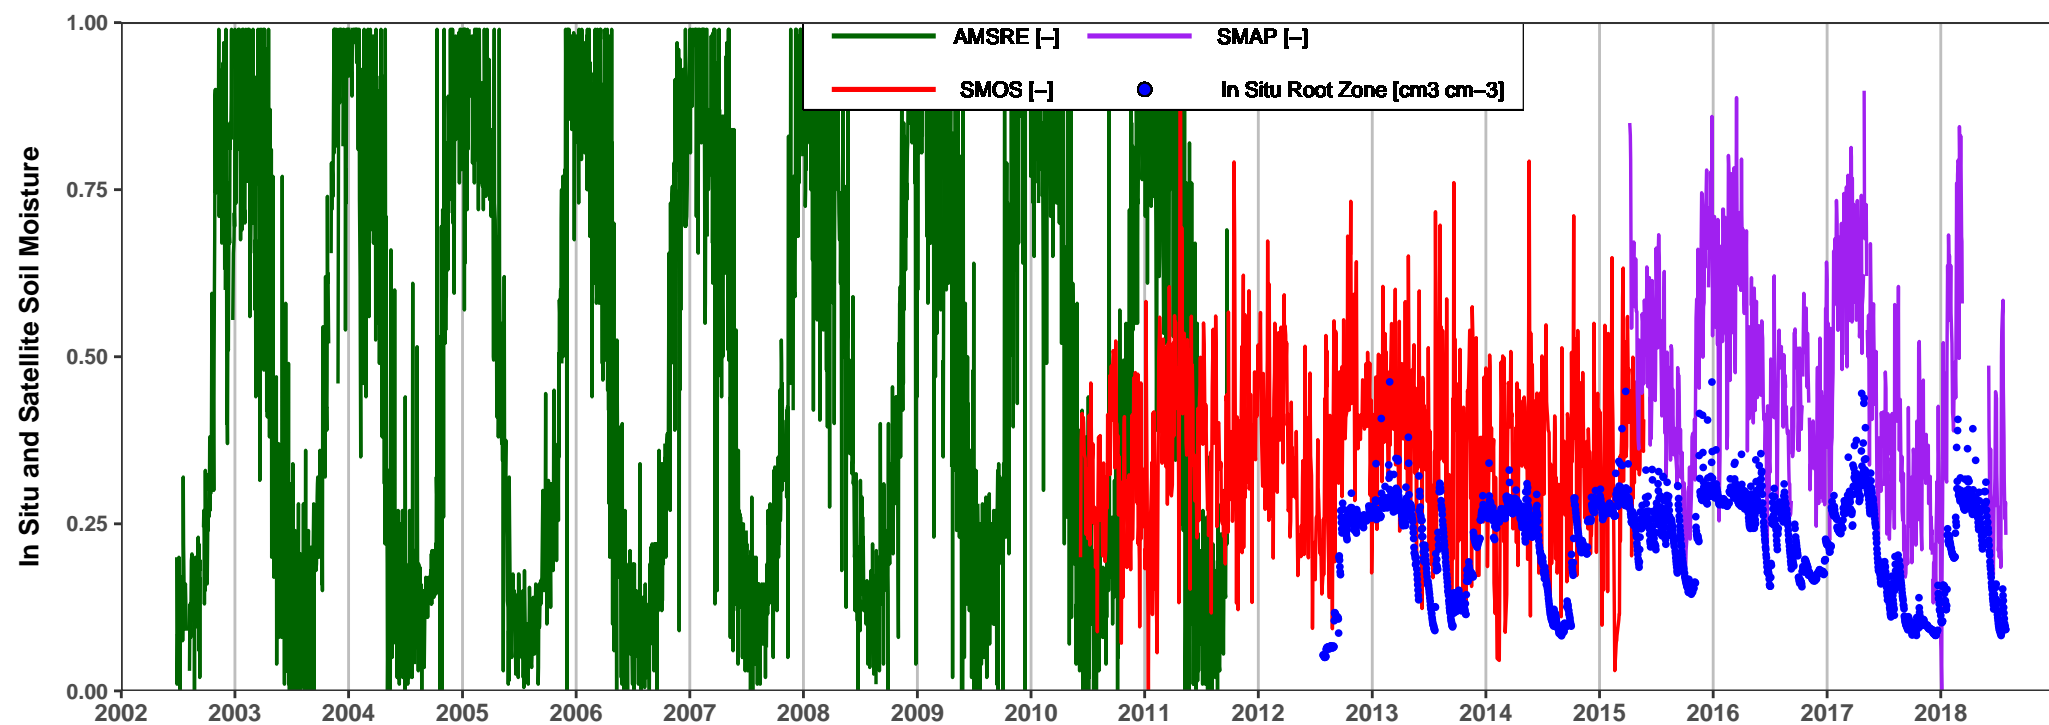

# Site: KoptisFarms

## AMSRE Average

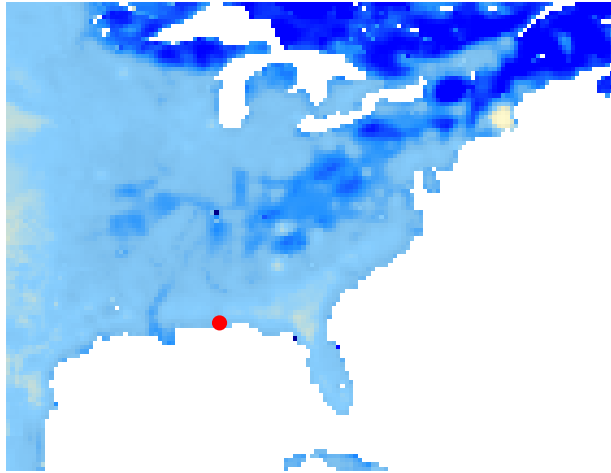

## SMOS Average

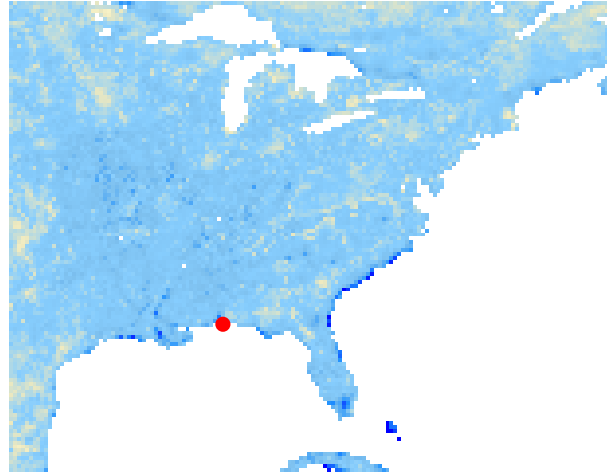

## SMAP Average

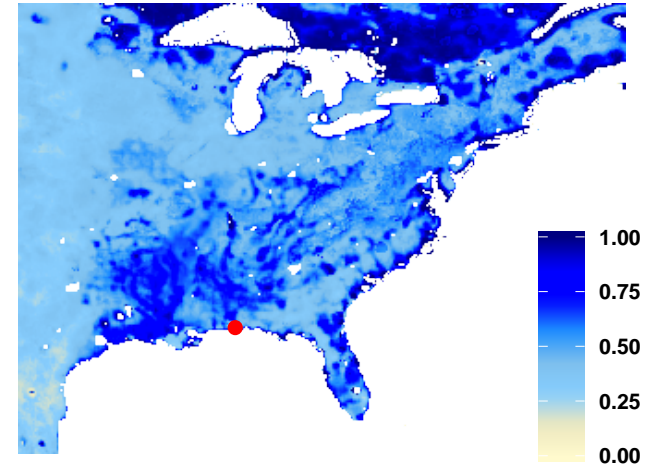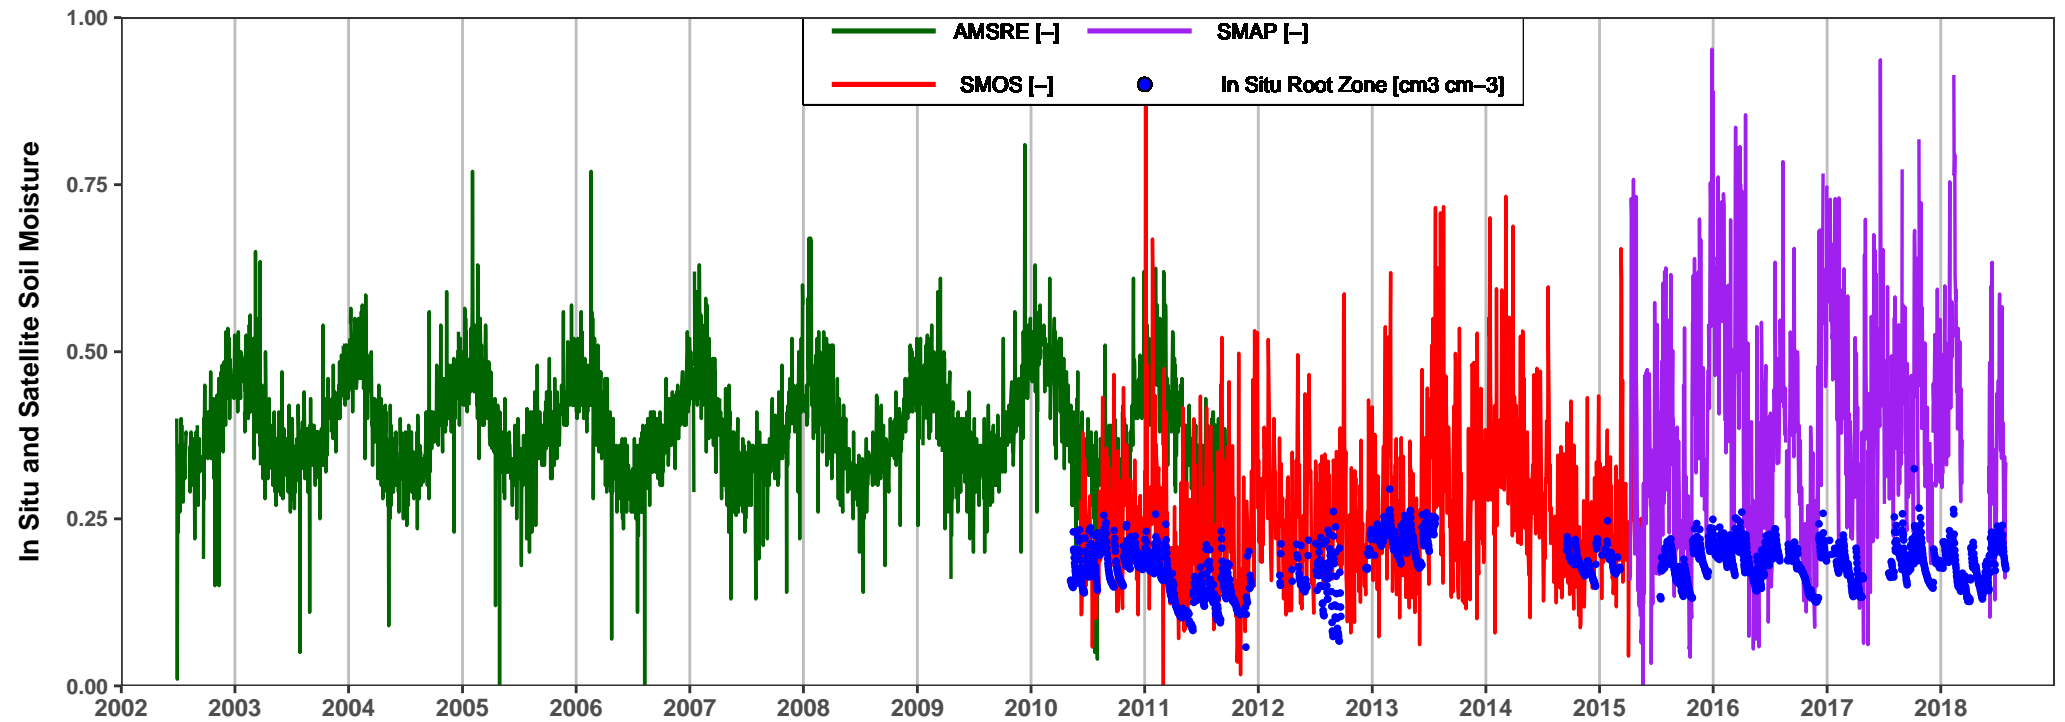

# Site: LittleRiver

## AMSRE Average

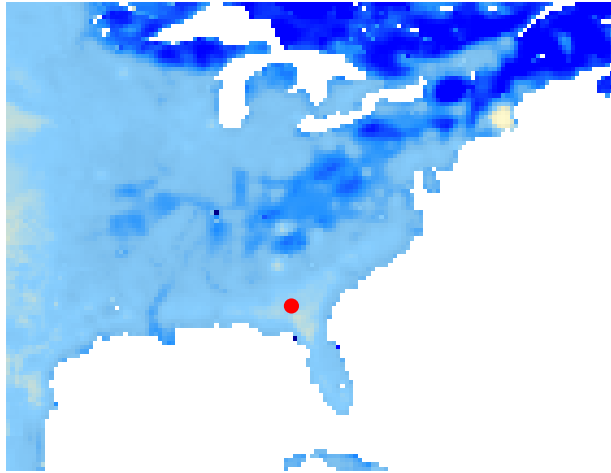

## SMOS Average

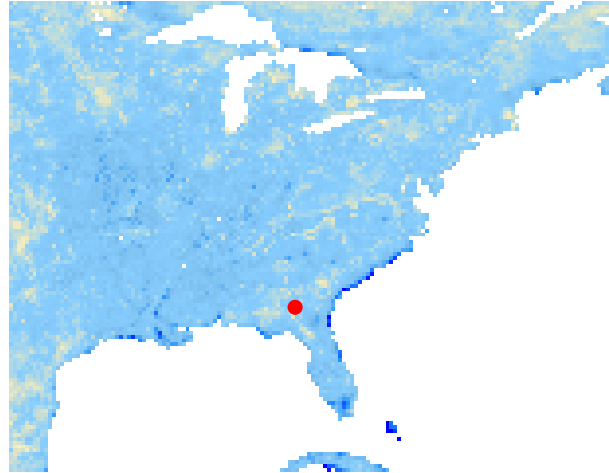

## SMAP Average

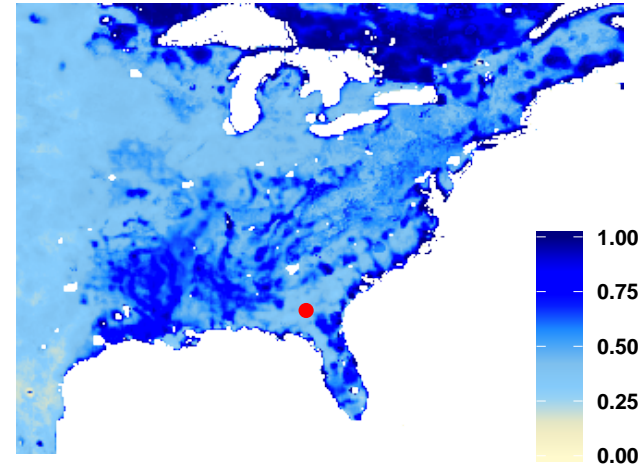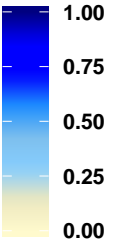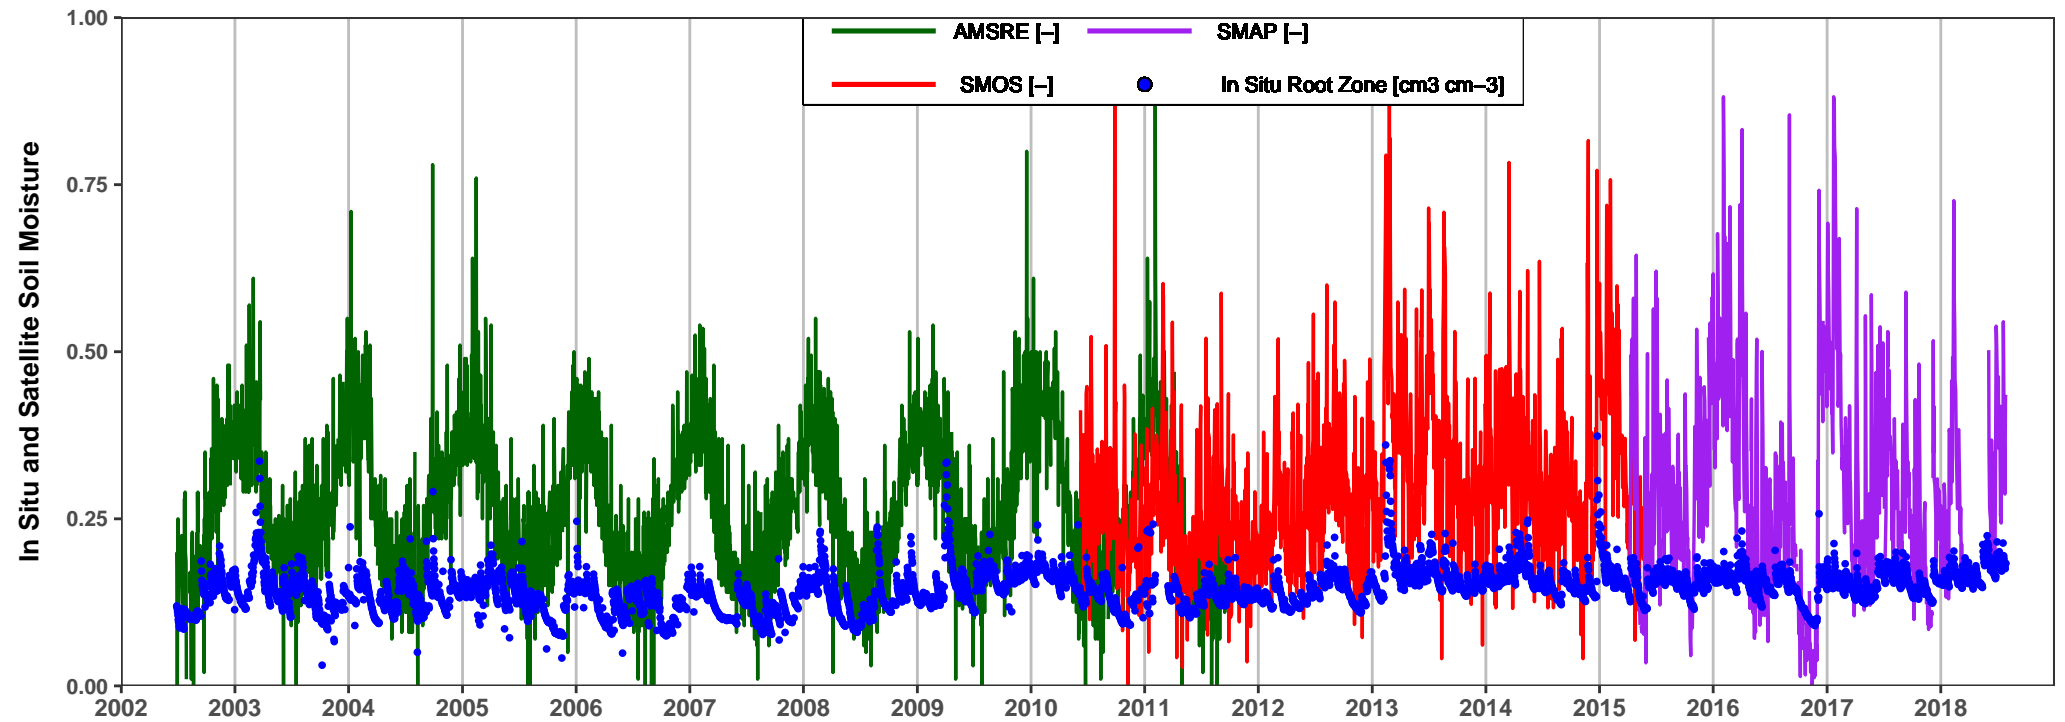

# Site: LivingstonUWA

## AMSRE Average

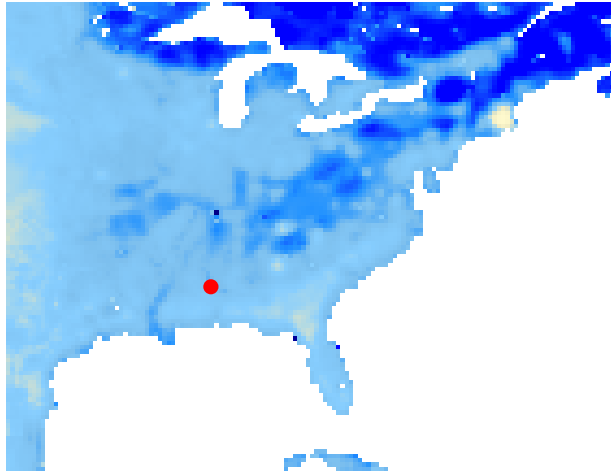

## SMOS Average

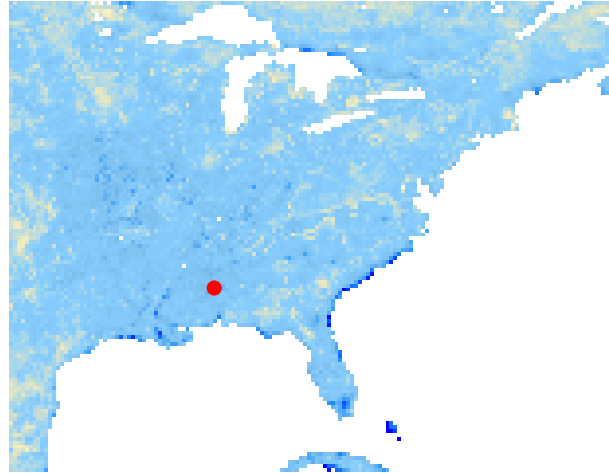

## SMAP Average

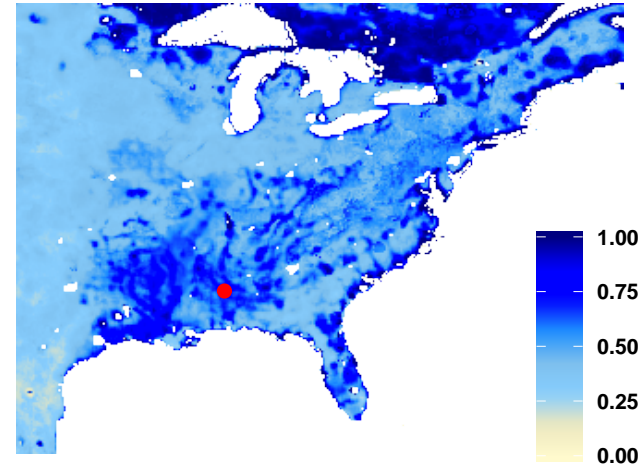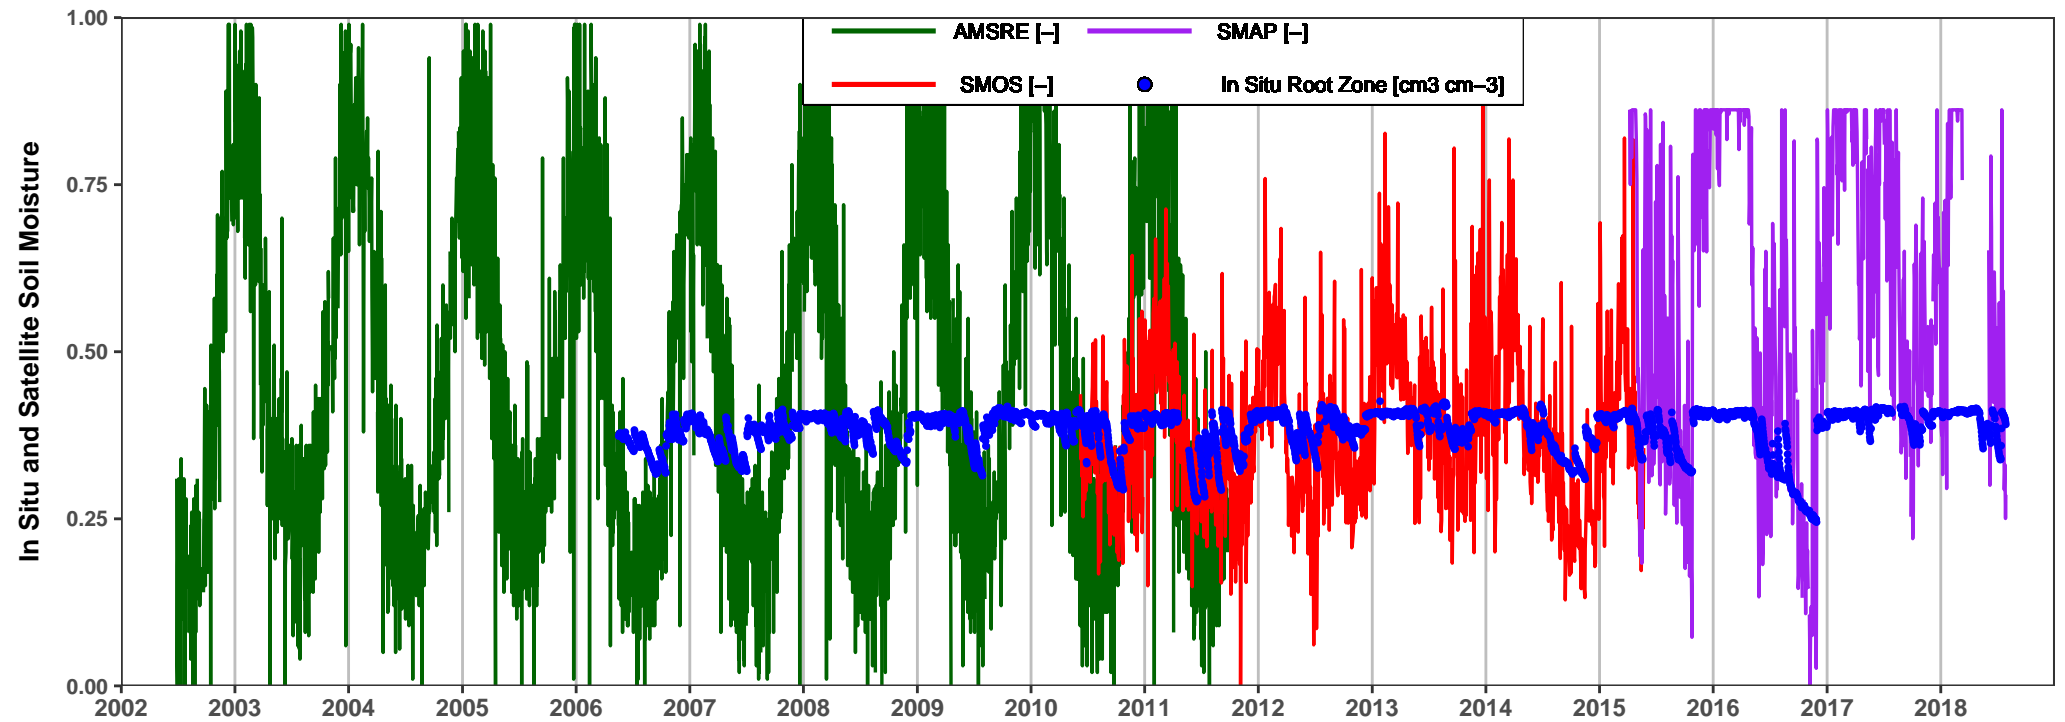

# Site: LyeBrook

## AMSRE Average

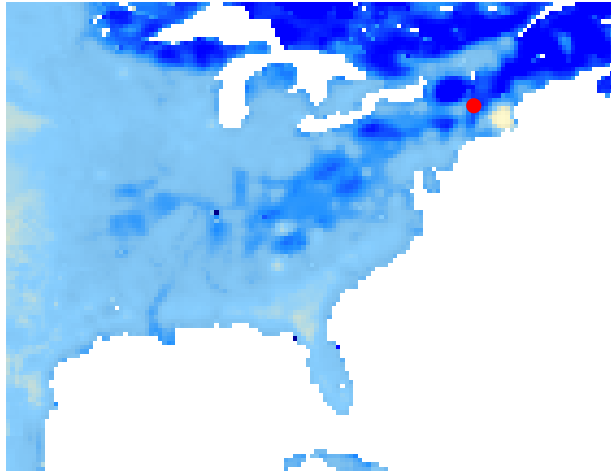

## SMOS Average

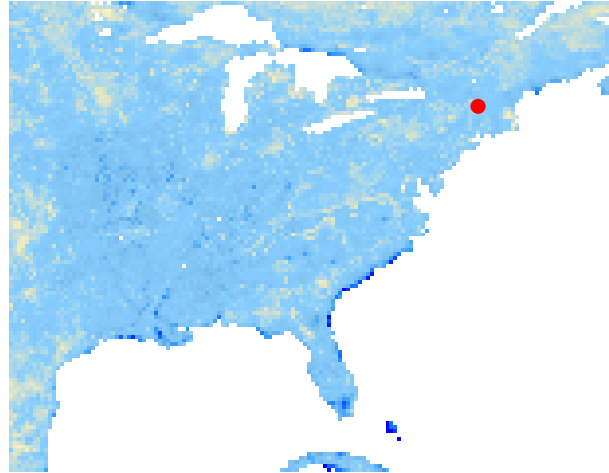

## SMAP Average

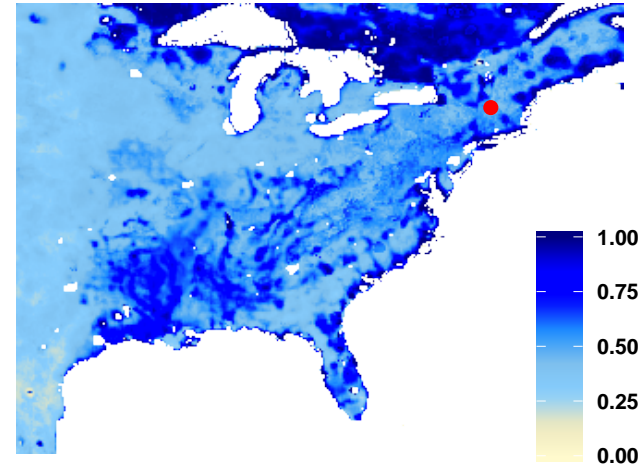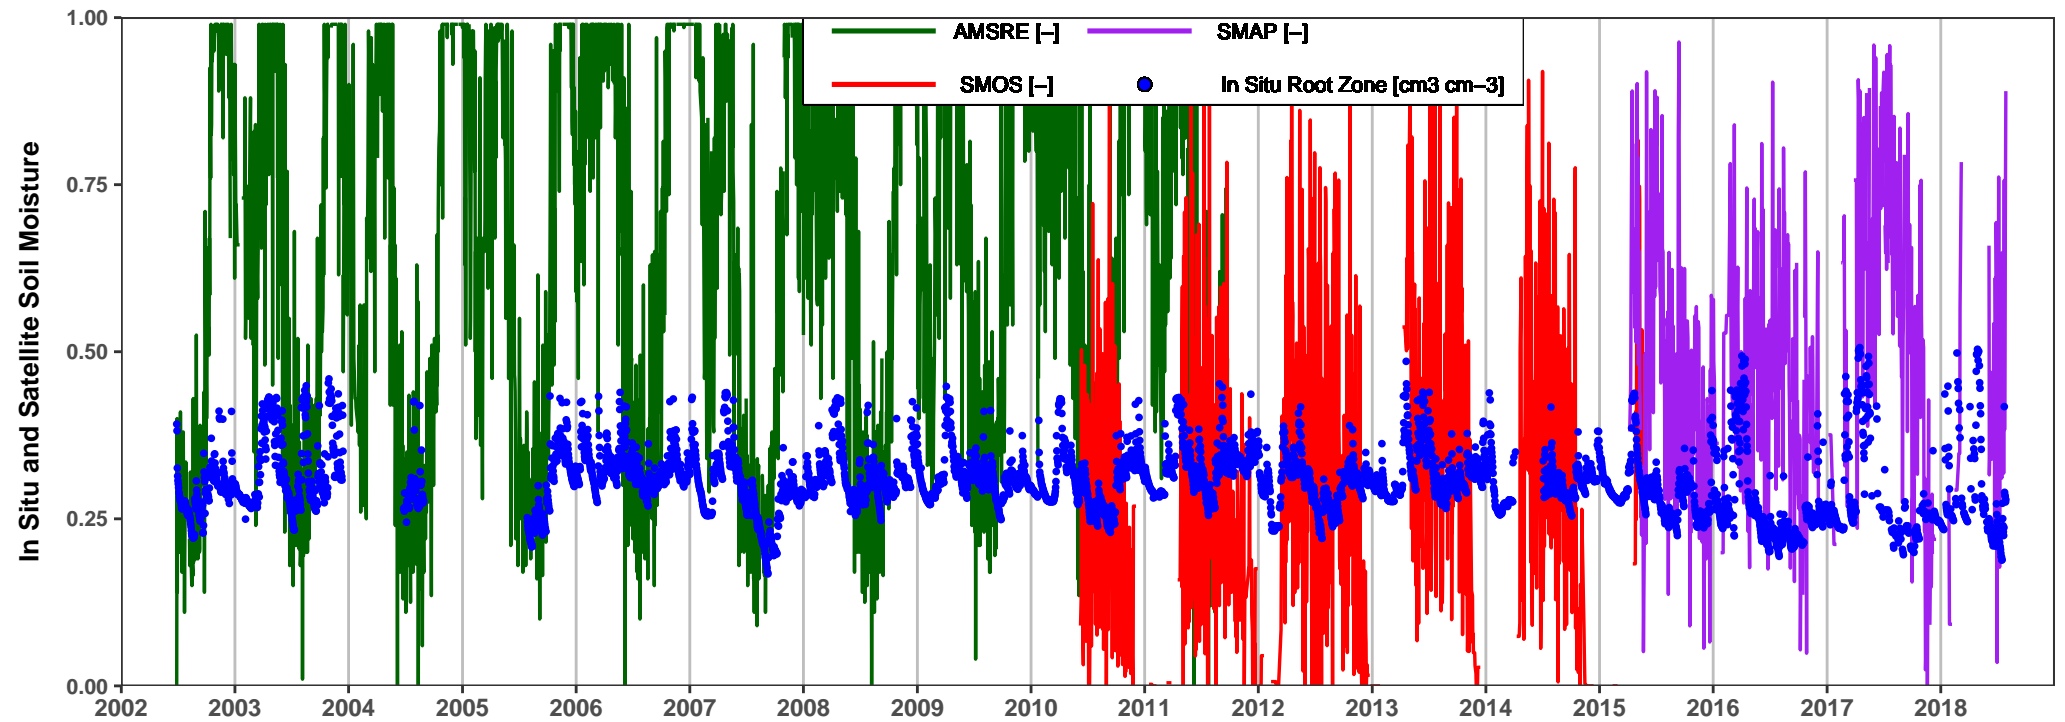



# Site: MahantangoCk

AMSRE Average

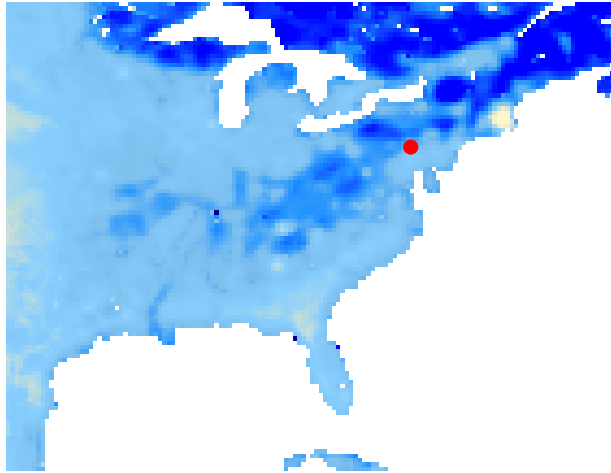

SMOS Average

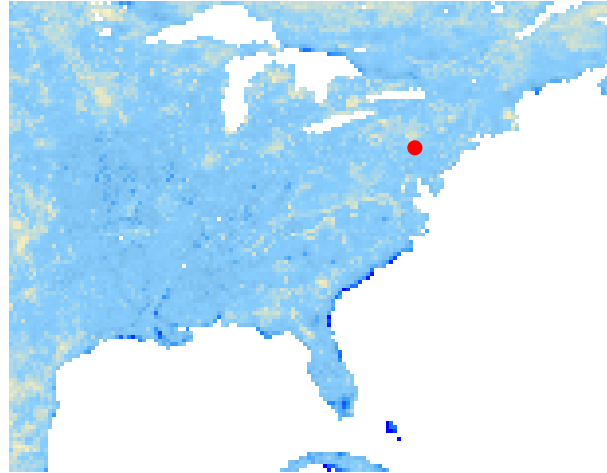

SMAP Average

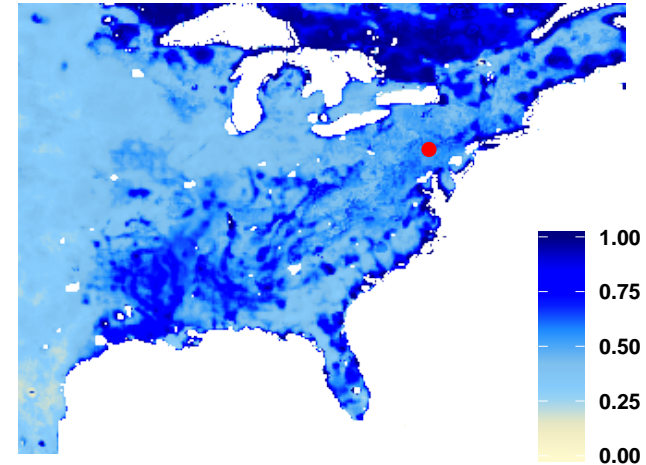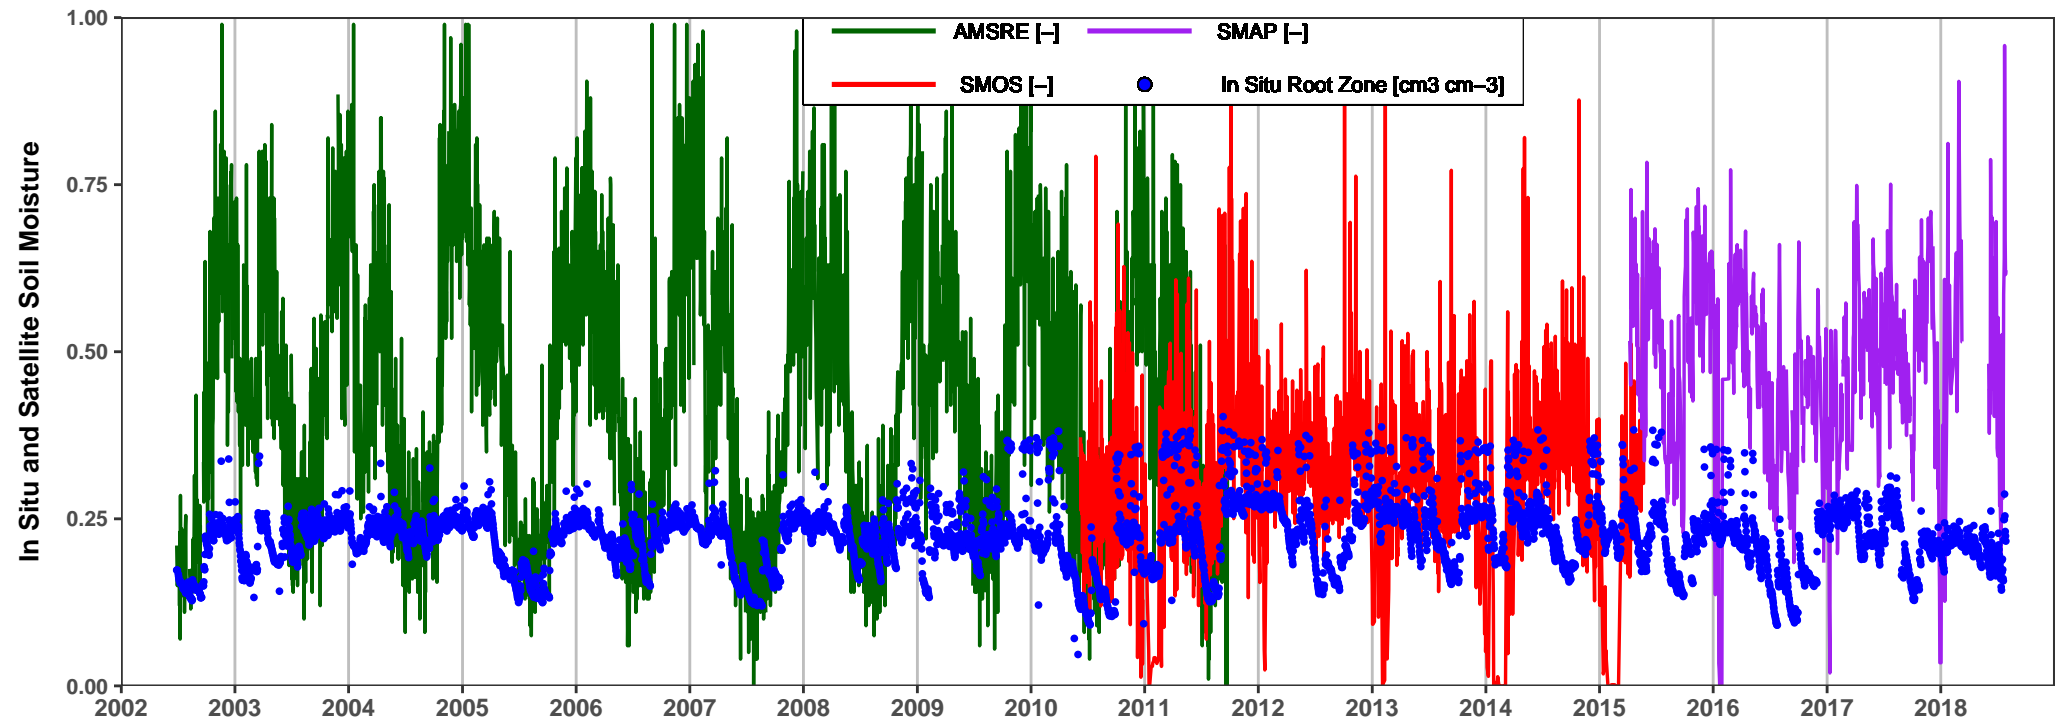

# Site: MammothCave

## AMSRE Average

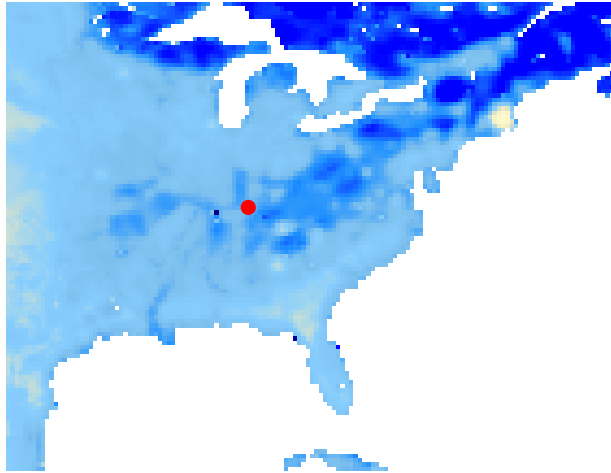

## SMOS Average

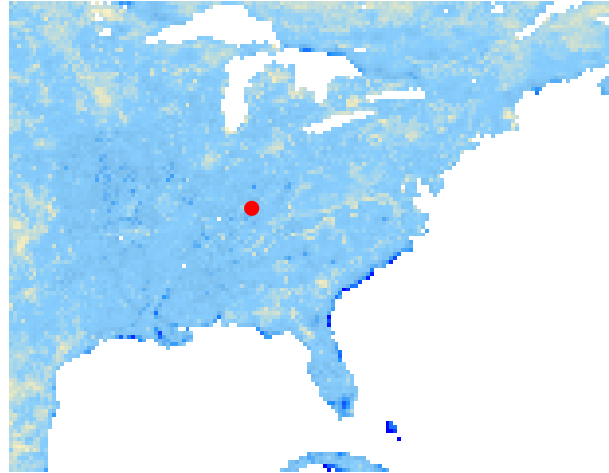

## SMAP Average

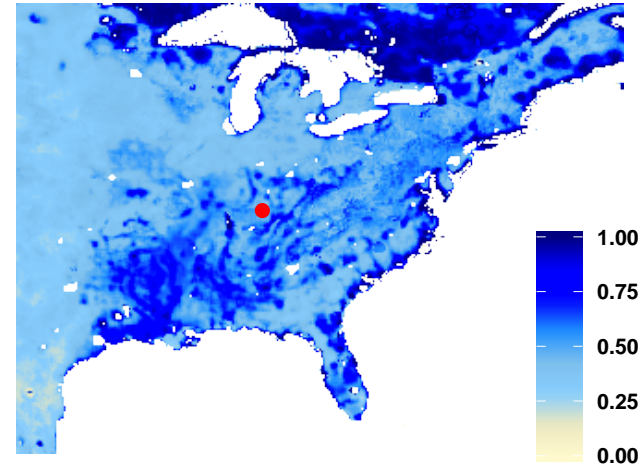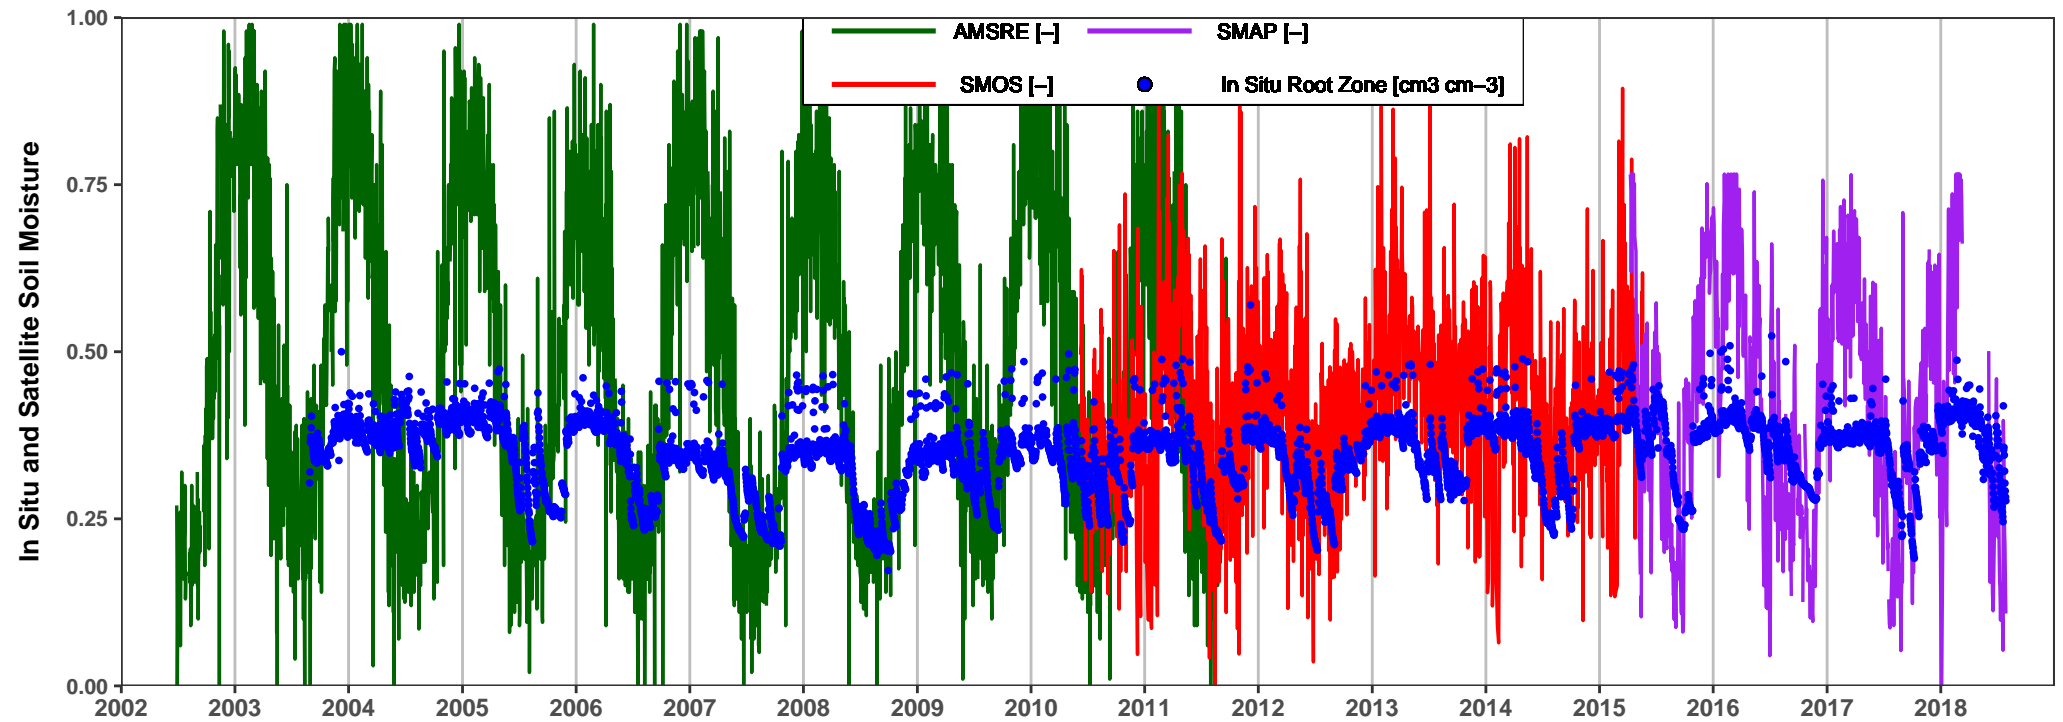

# Site: MascomaRiver

## AMSRE Average

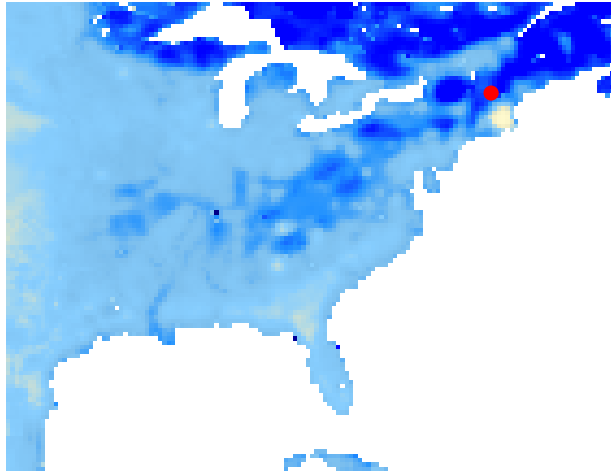

## SMOS Average

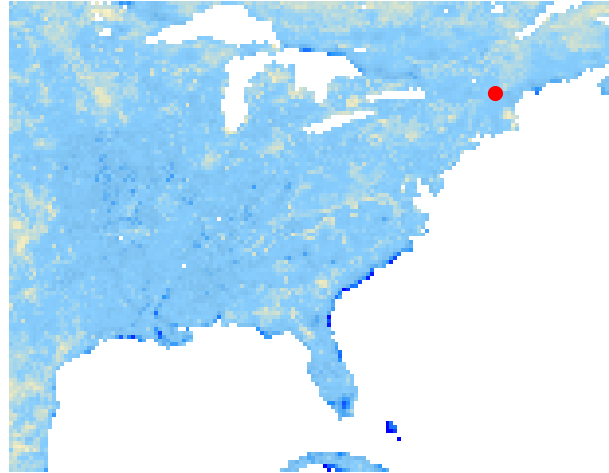

## SMAP Average

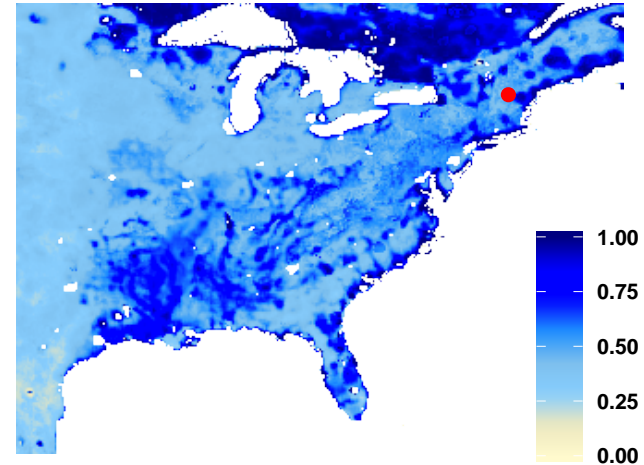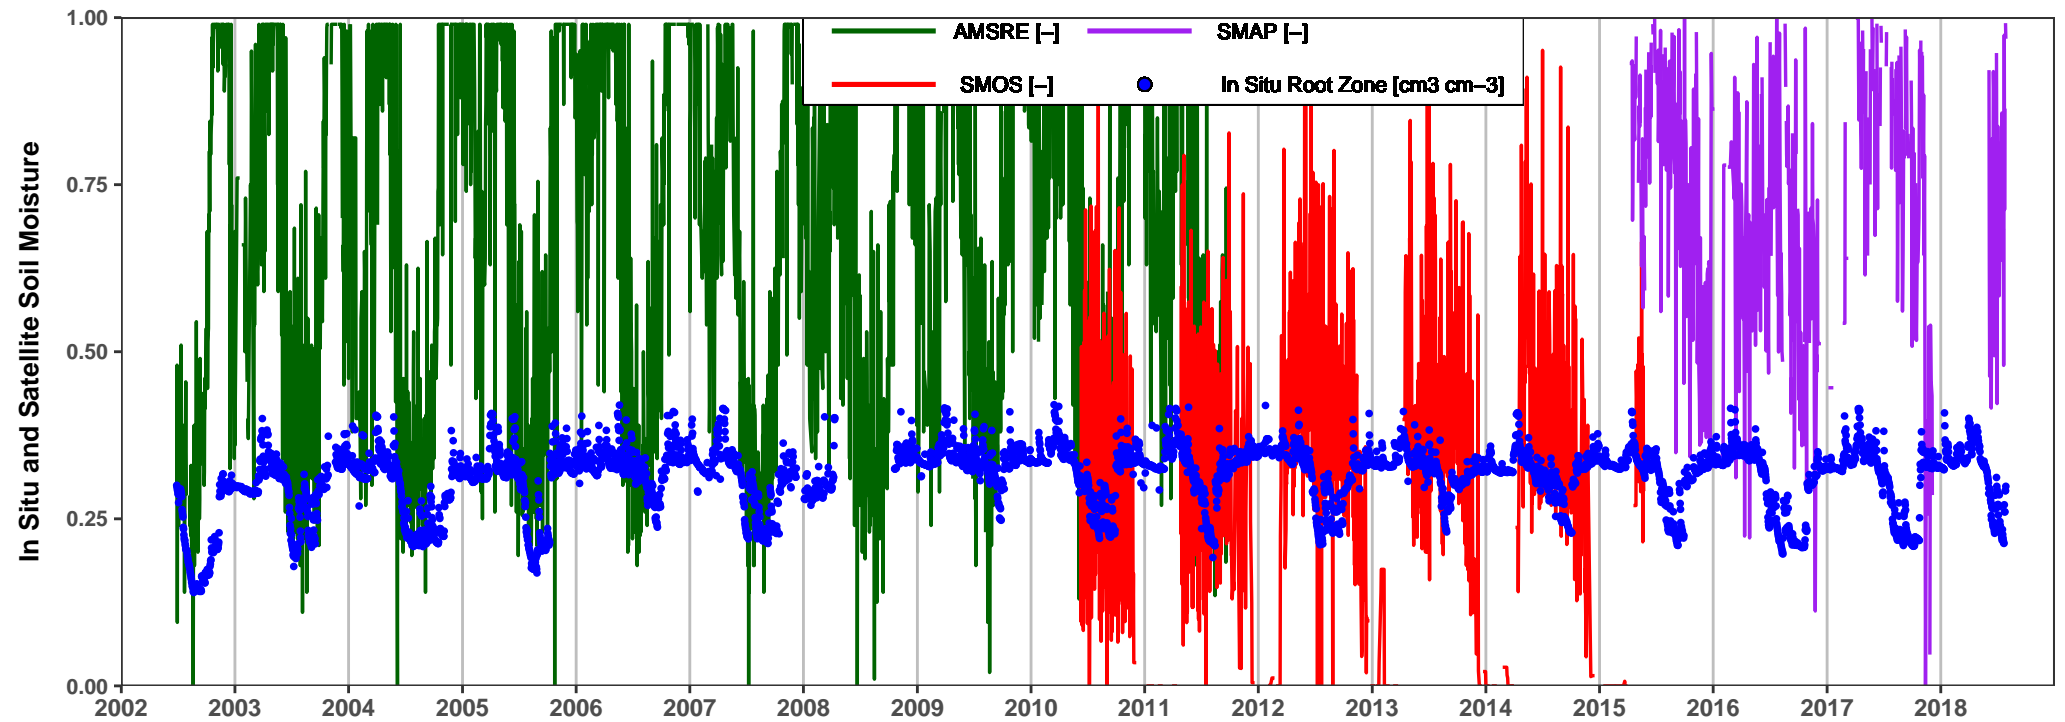

# Site: Mason1

## AMSRE Average

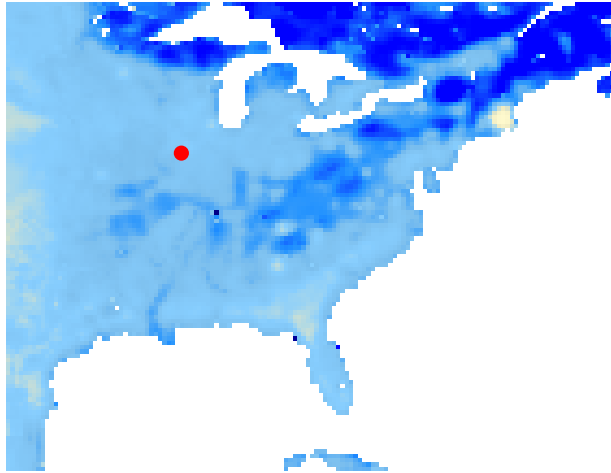

## SMOS Average

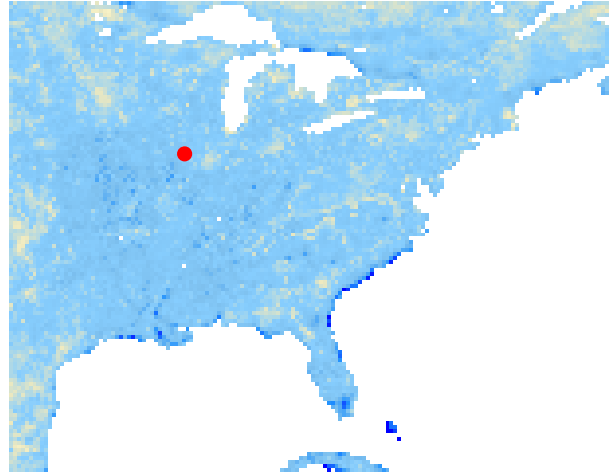

## SMAP Average

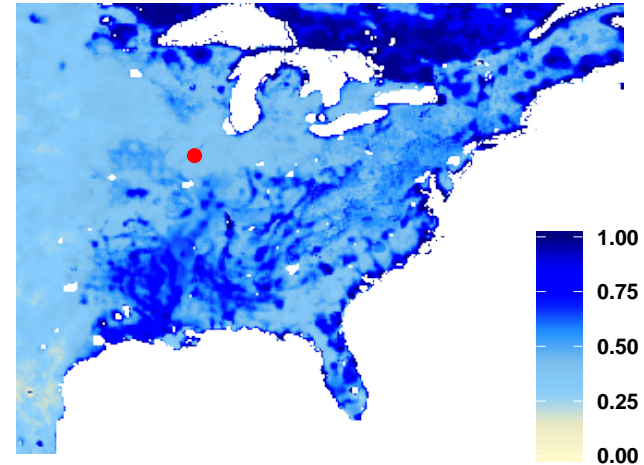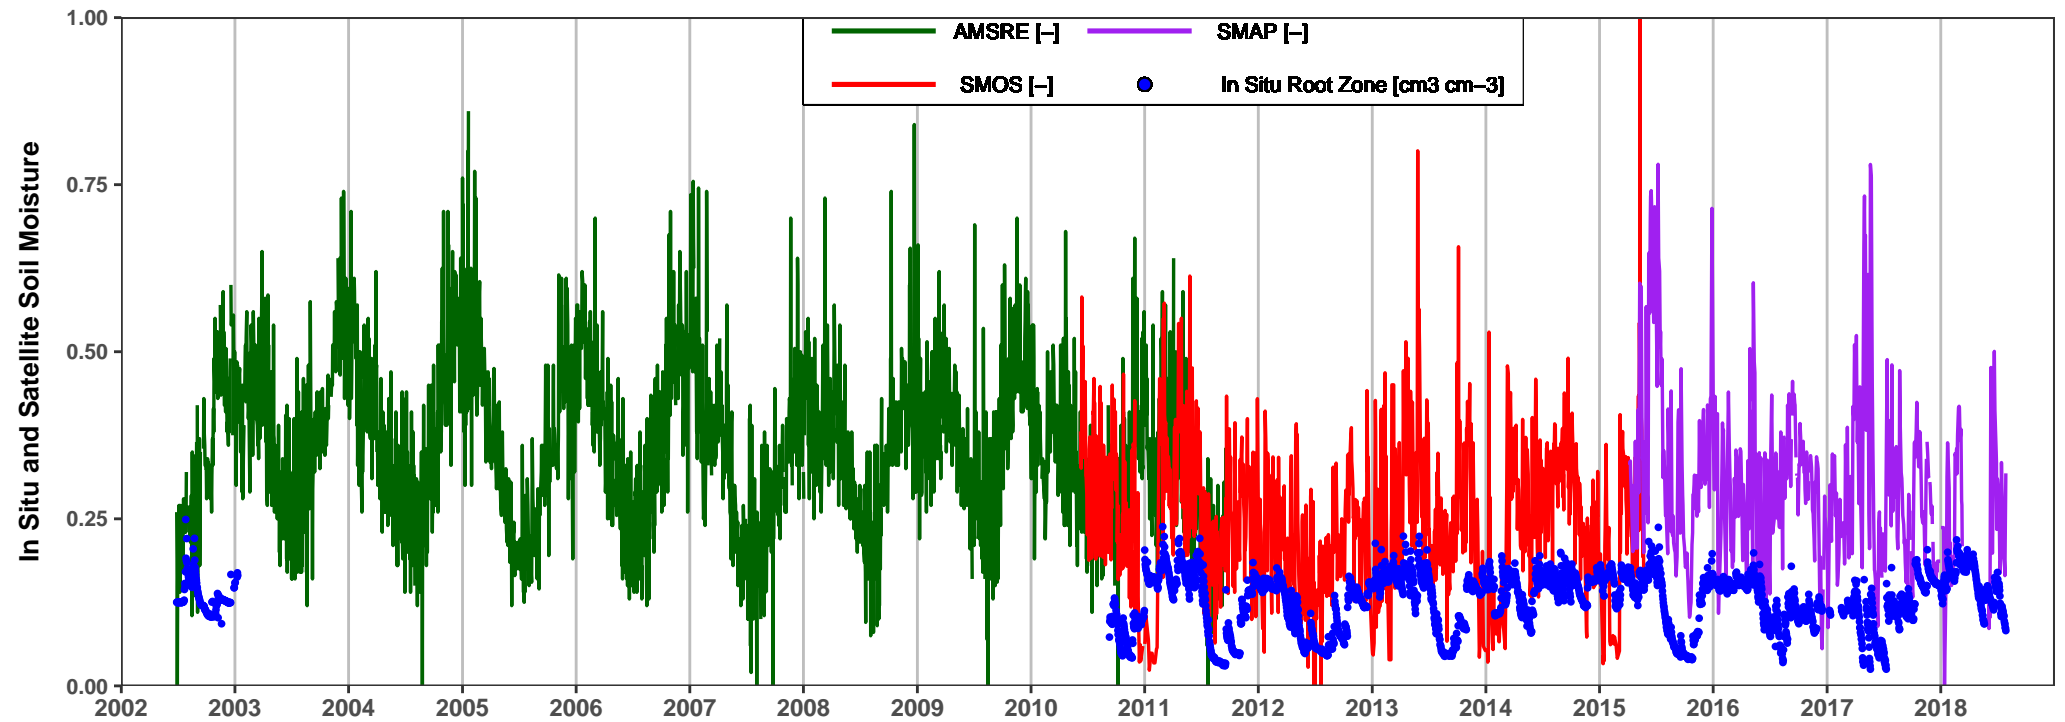

Site: Mayday

AMSRE Average

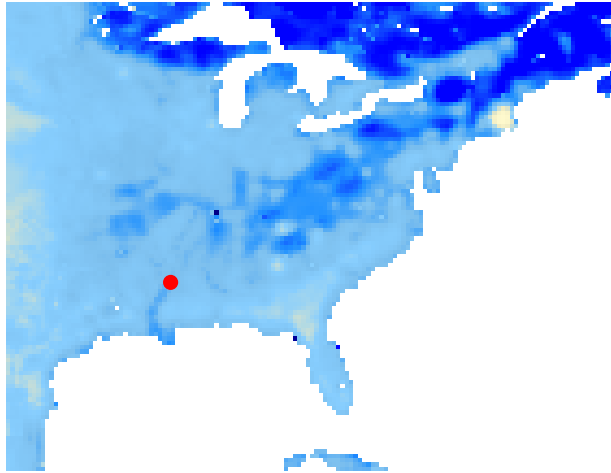

SMOS Average

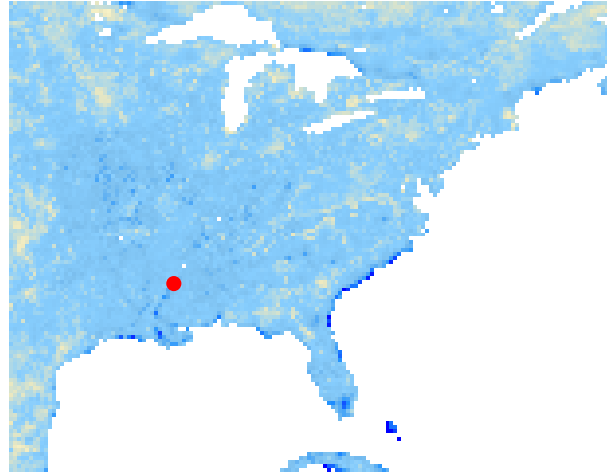

SMAP Average

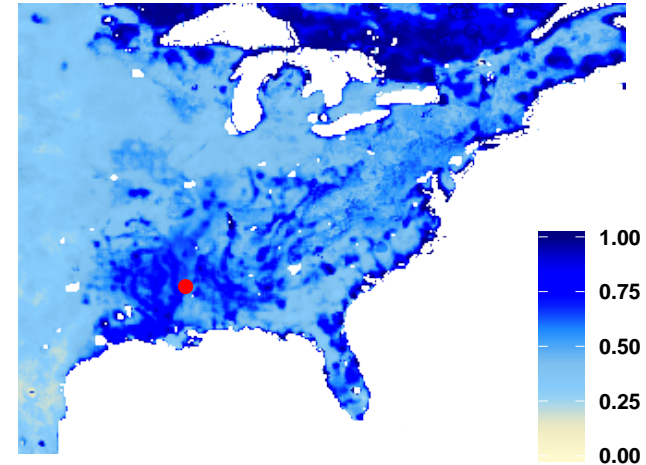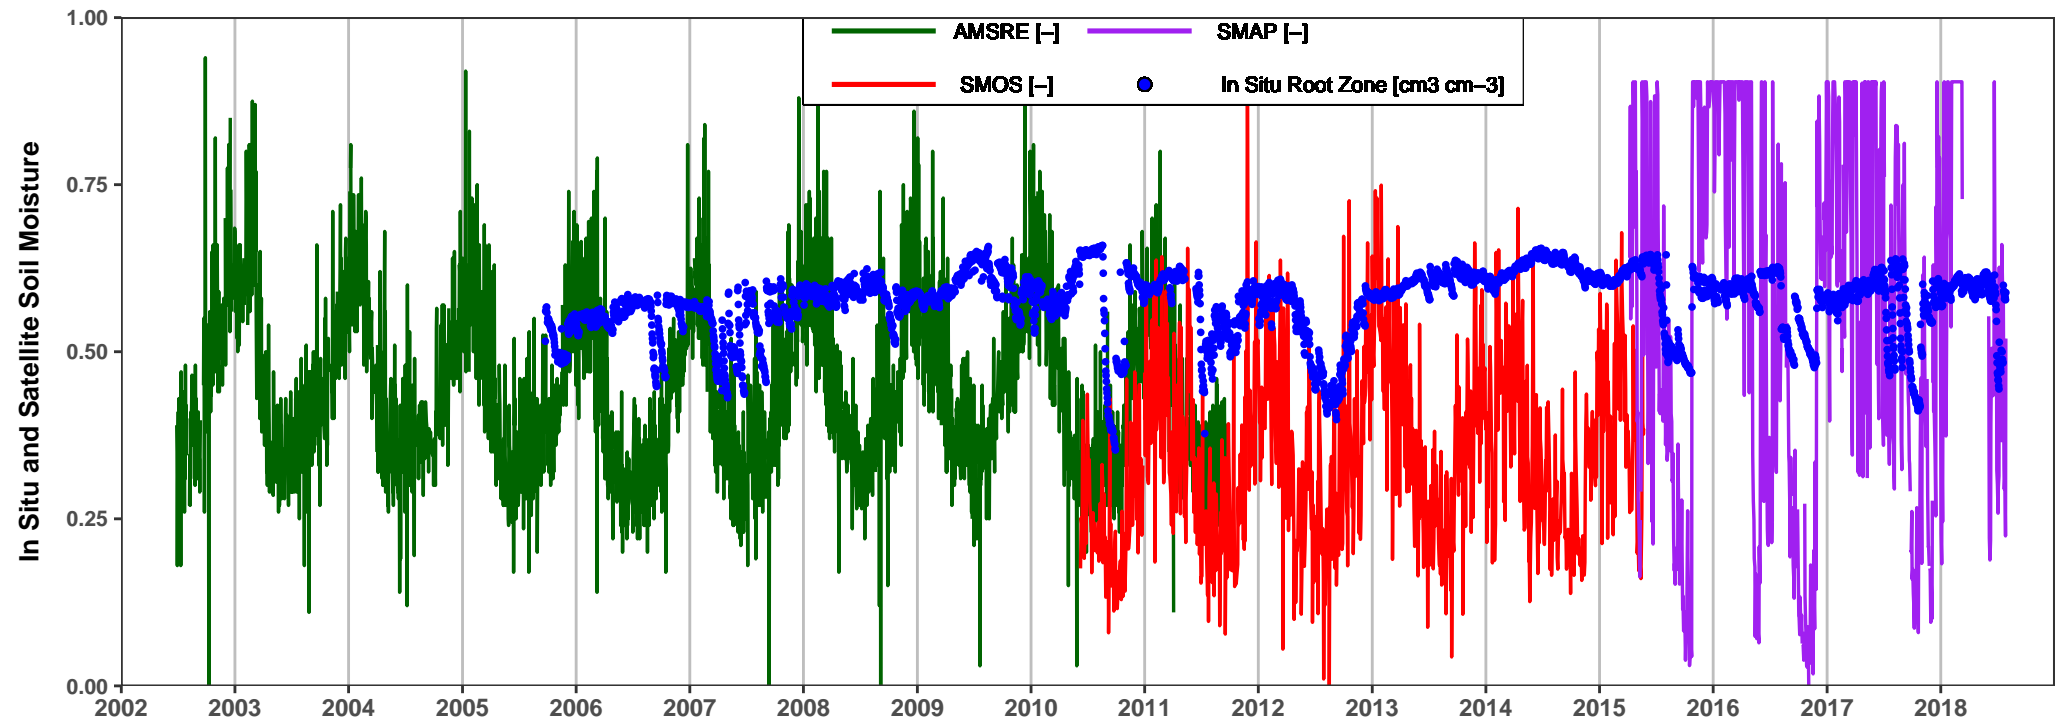

# Site: McAllisterFarm

## AMSRE Average

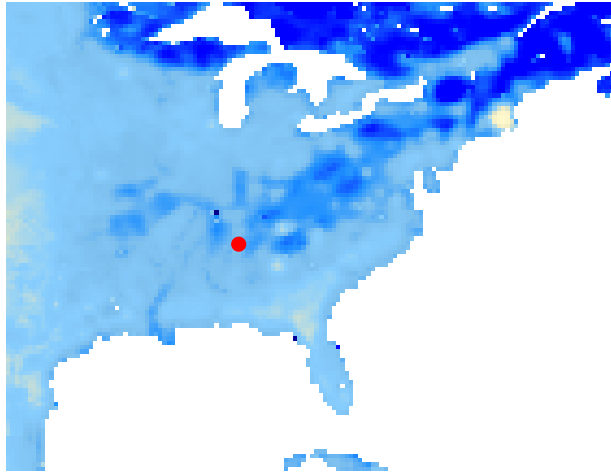

## SMOS Average

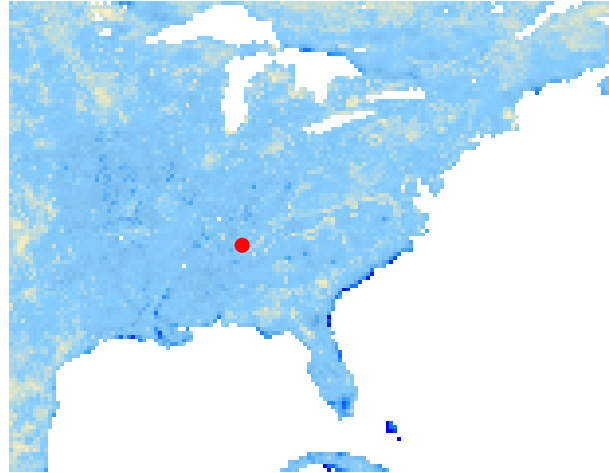

## SMAP Average

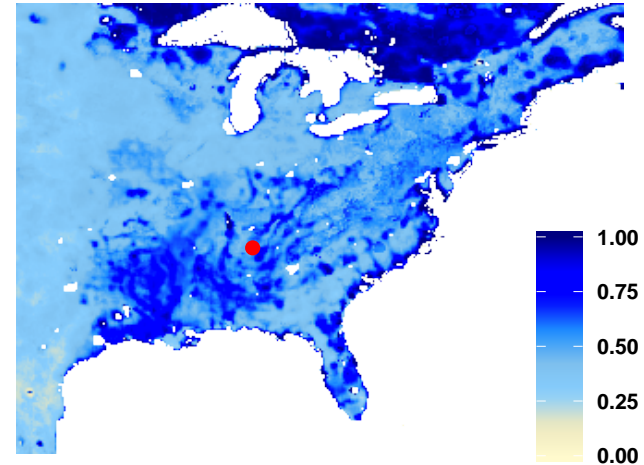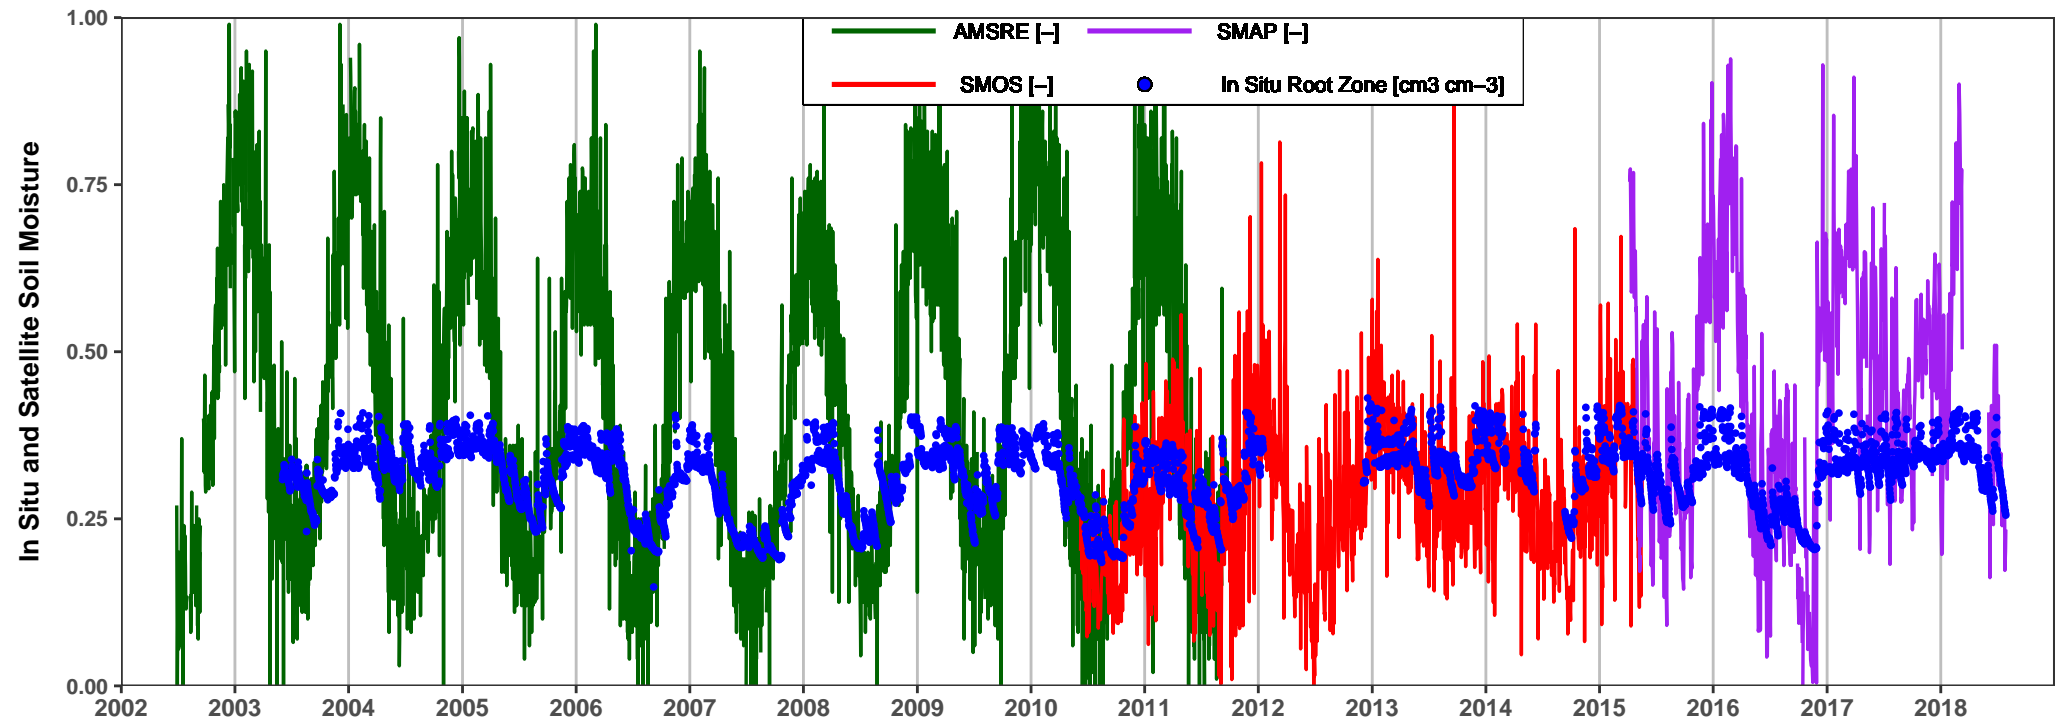



# Site: MollyCaren1

AMSRE Average

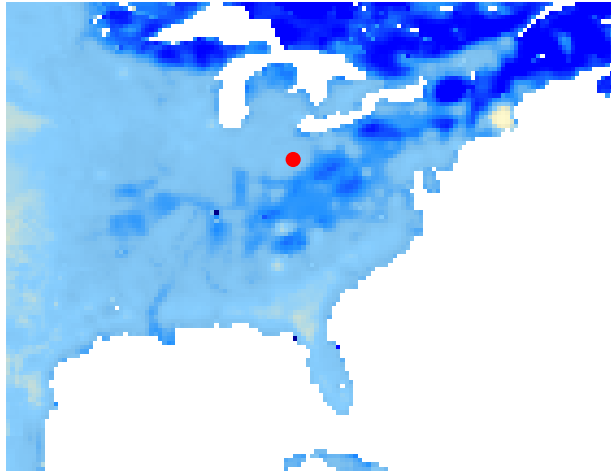

SMOS Average

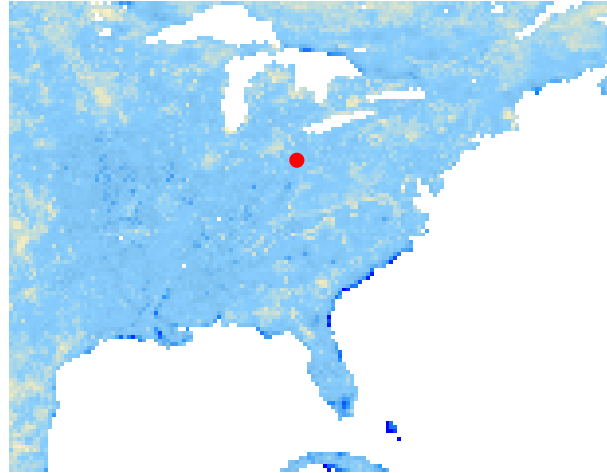

SMAP Average

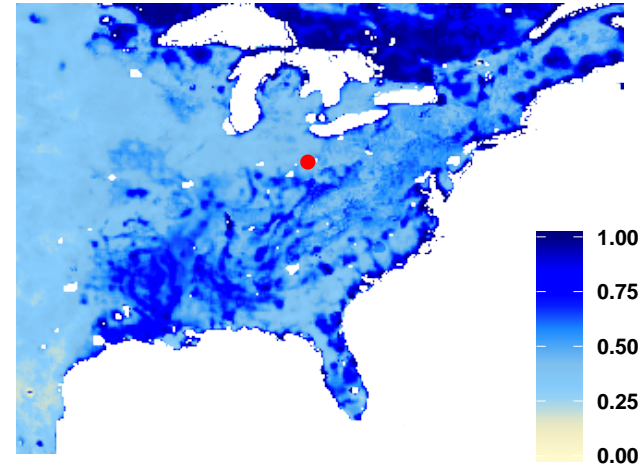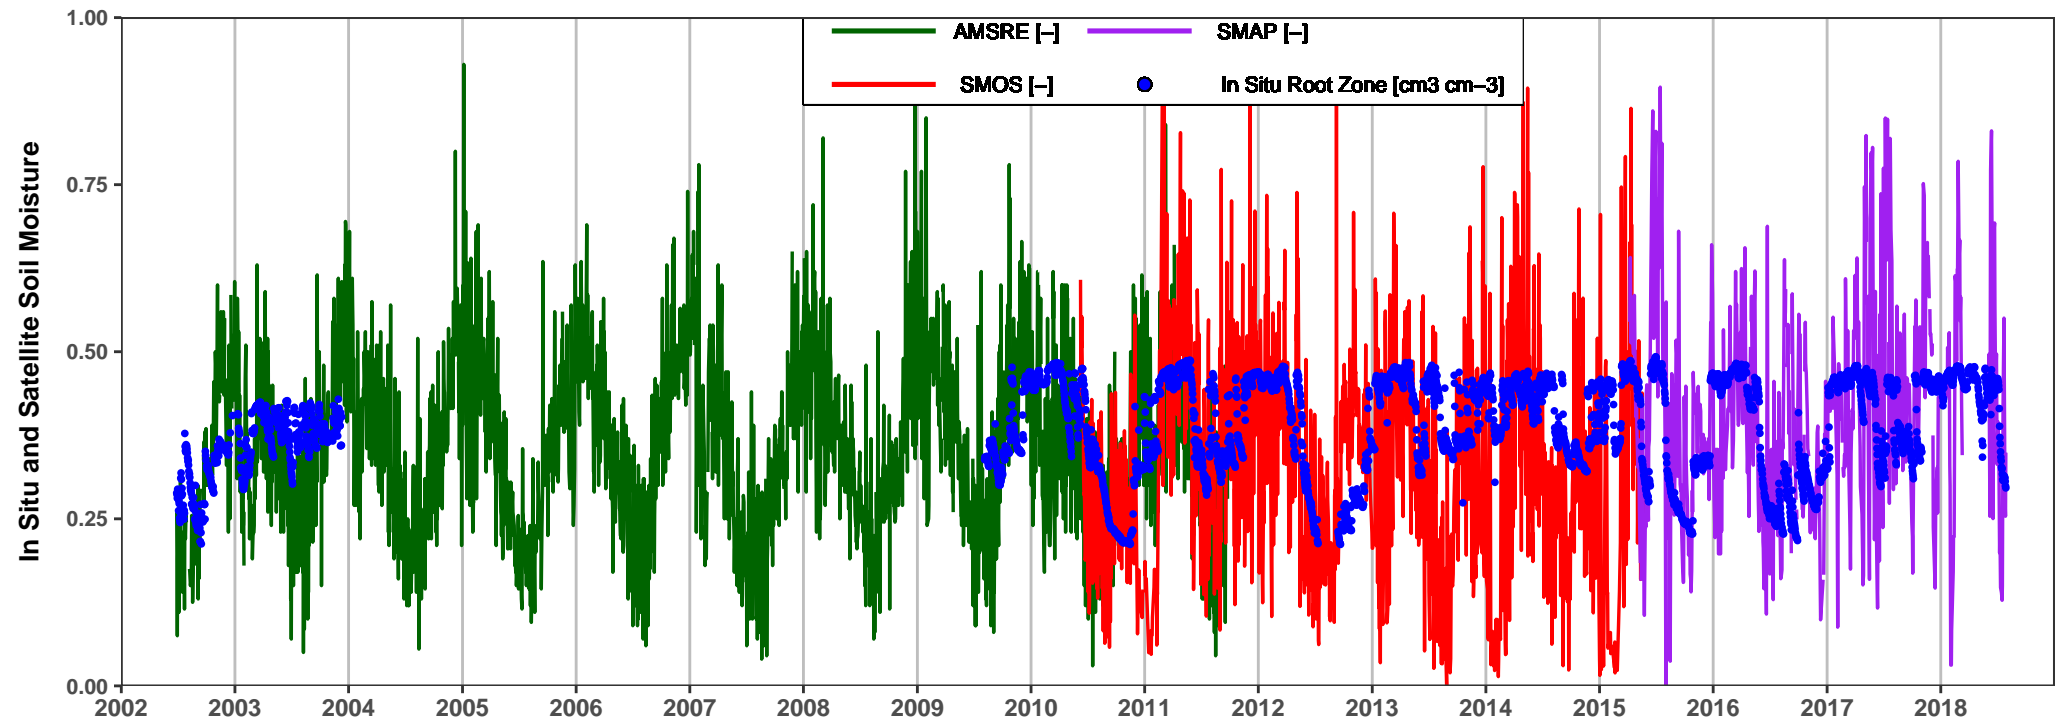

# Site: MorrisFarms

## AMSRE Average

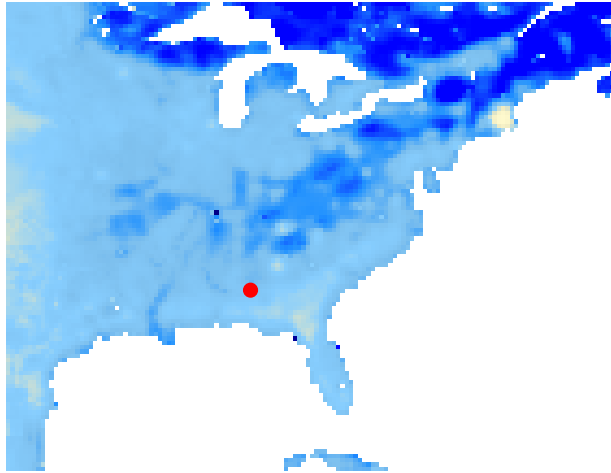

## SMOS Average

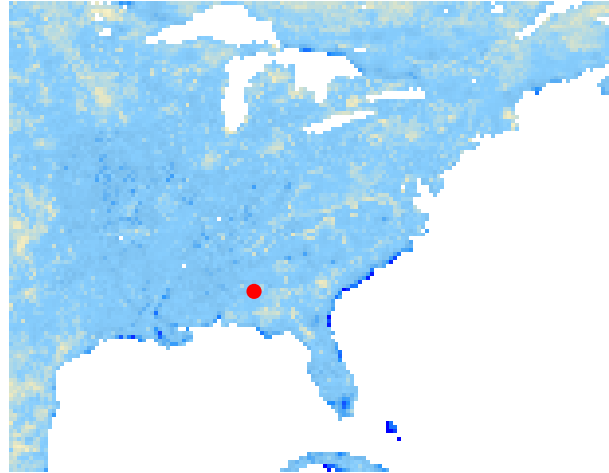

## SMAP Average

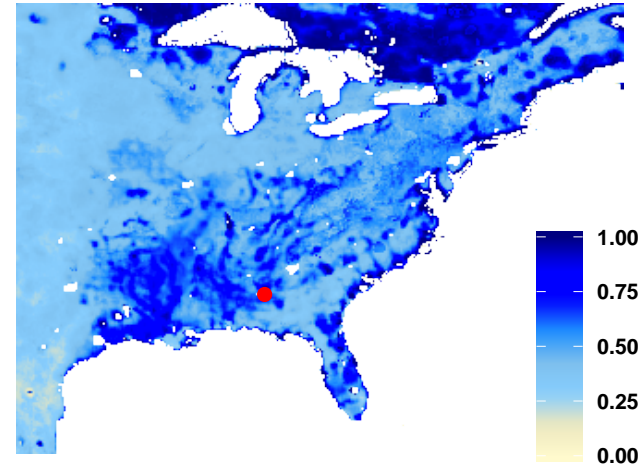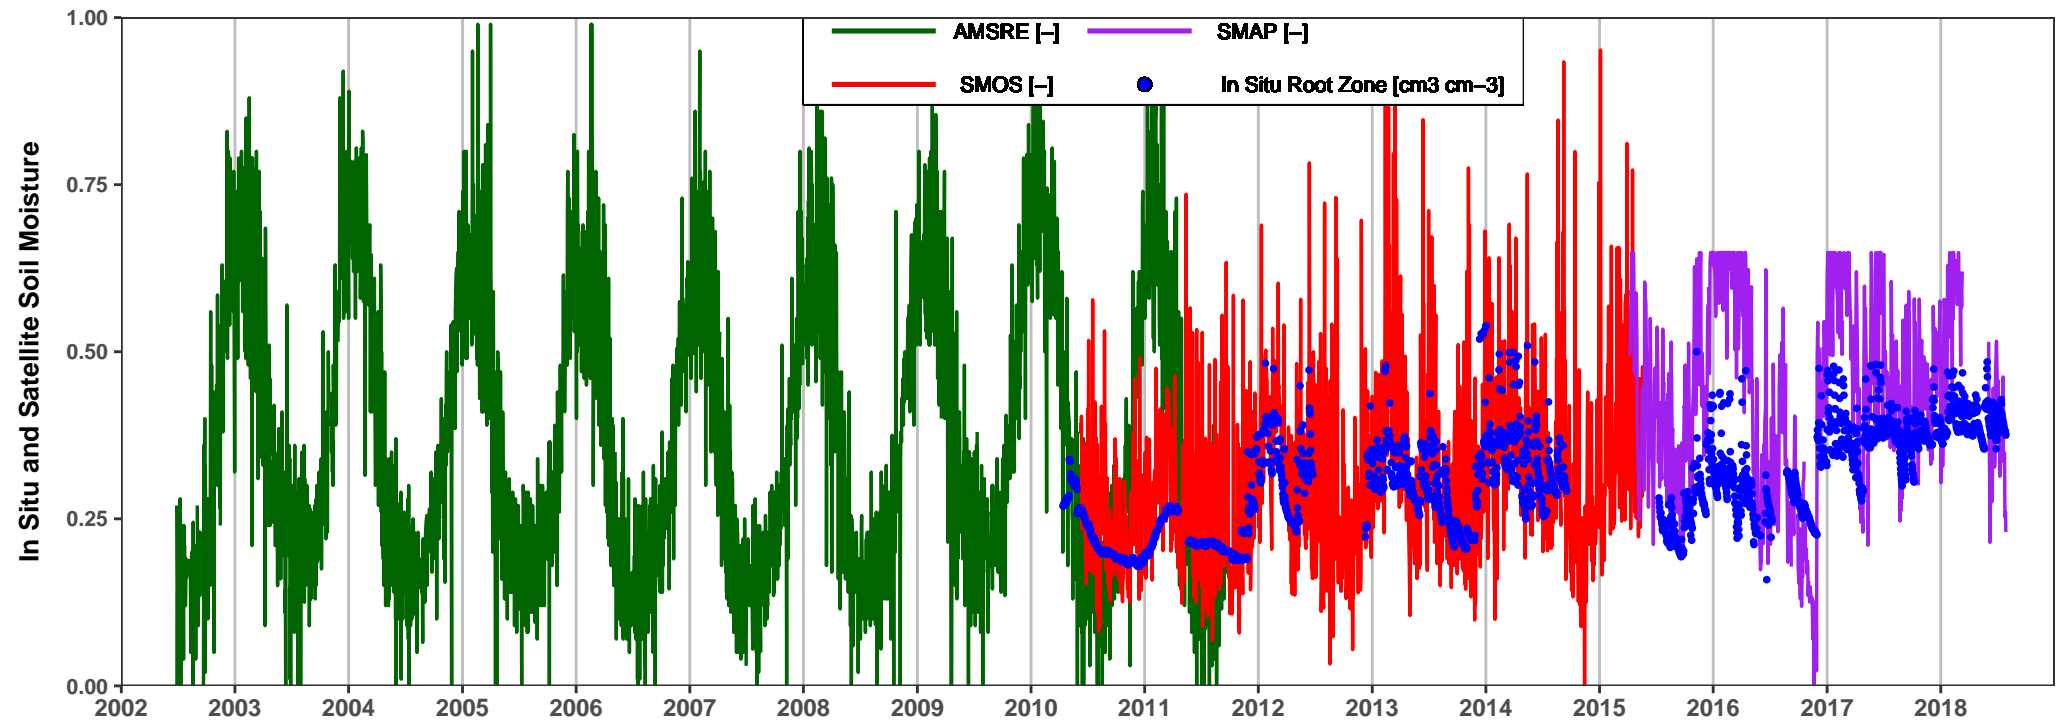

# Site: MountMansfield

## AMSRE Average

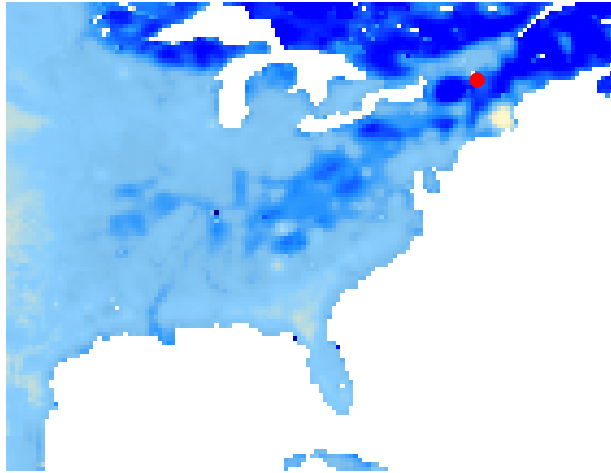

## SMOS Average

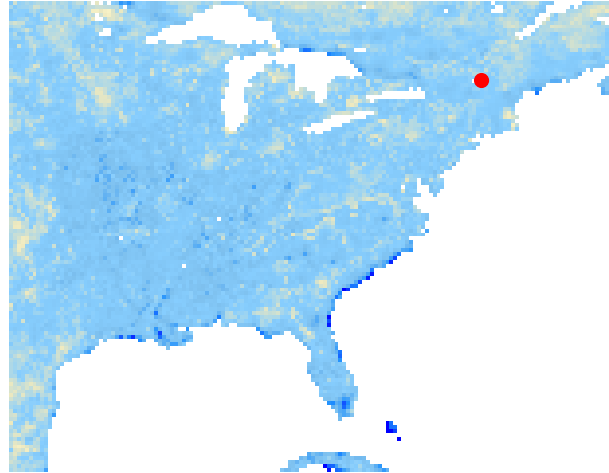

## SMAP Average

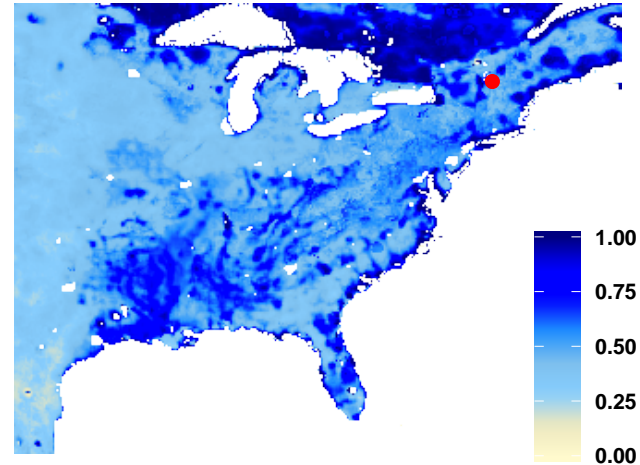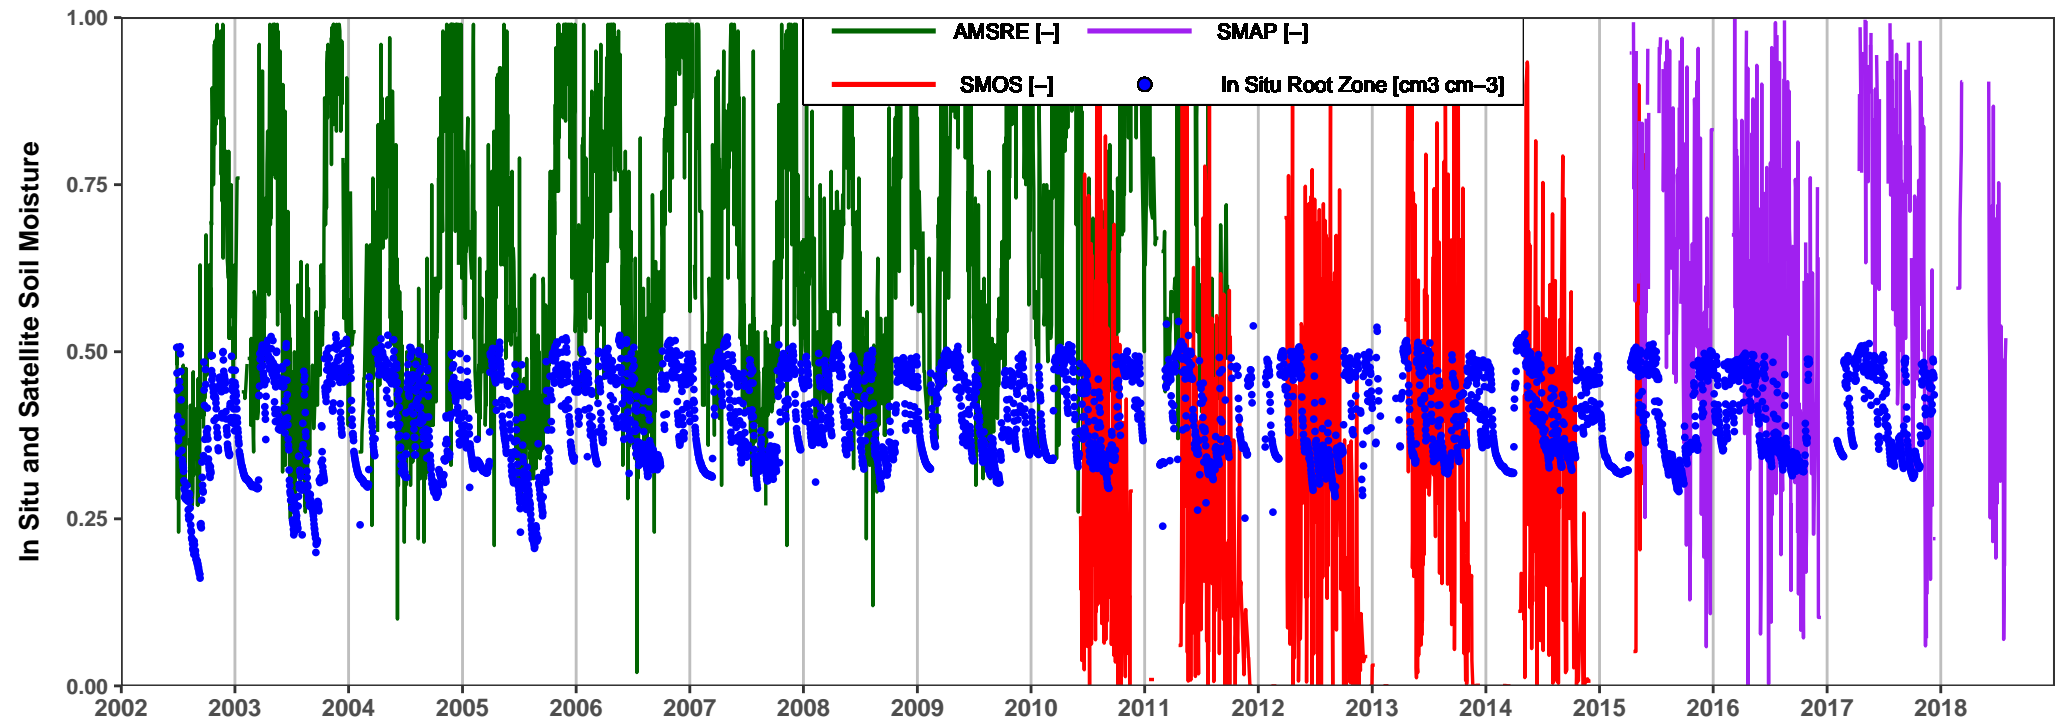

# Site: MtVernon

## AMSRE Average

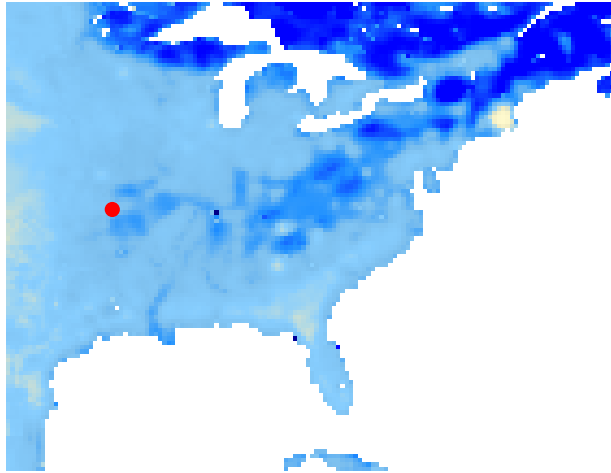

## SMOS Average

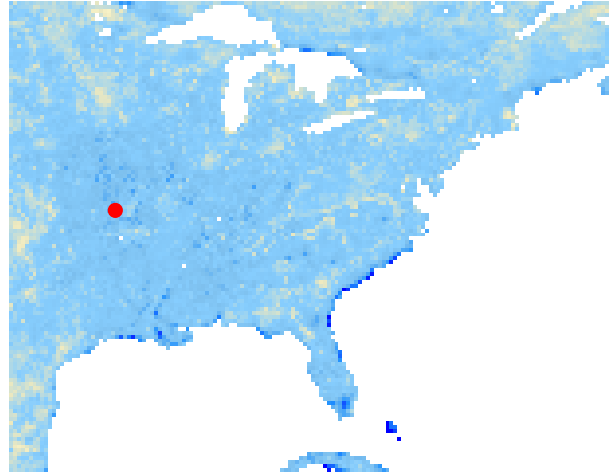

## SMAP Average

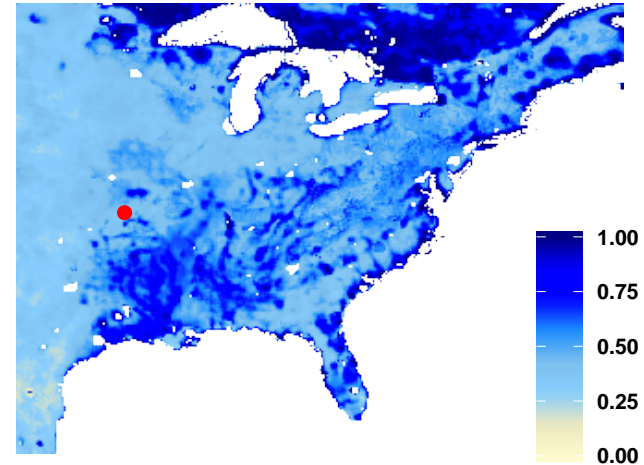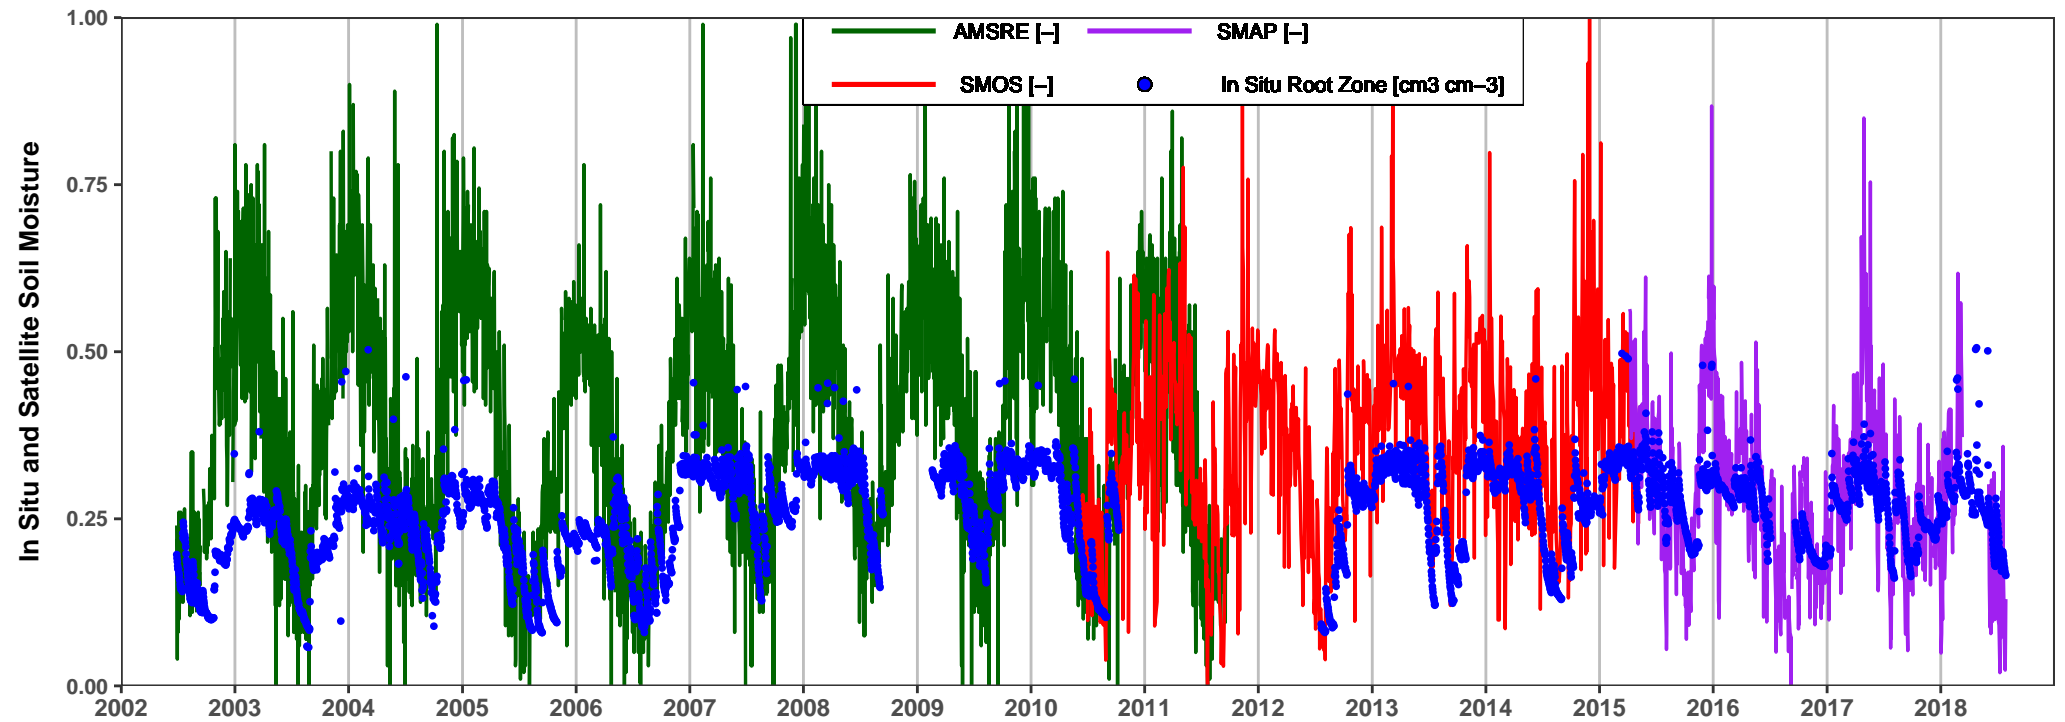

# Site: NPiedmonthArec

AMSRE Average

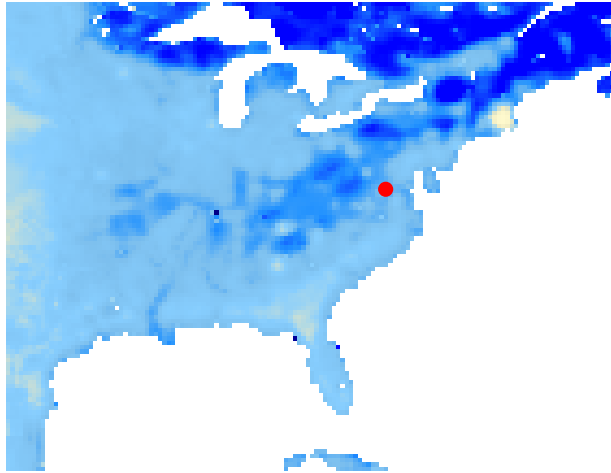

SMOS Average

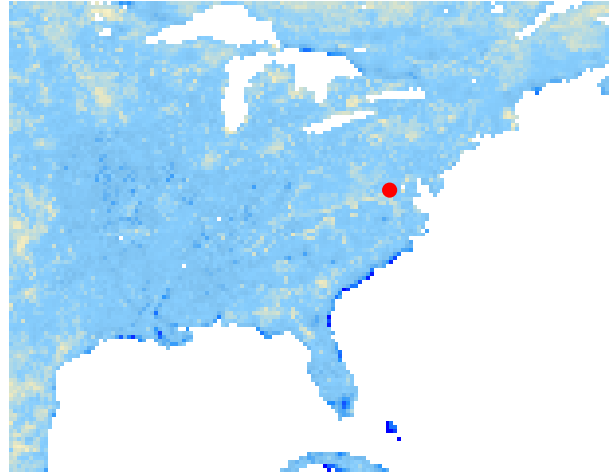

SMAP Average

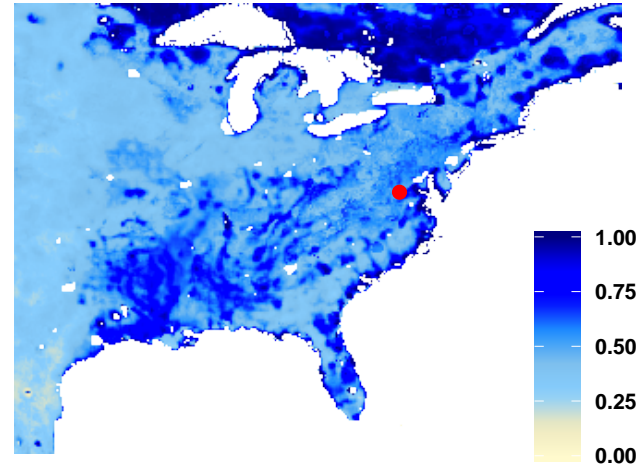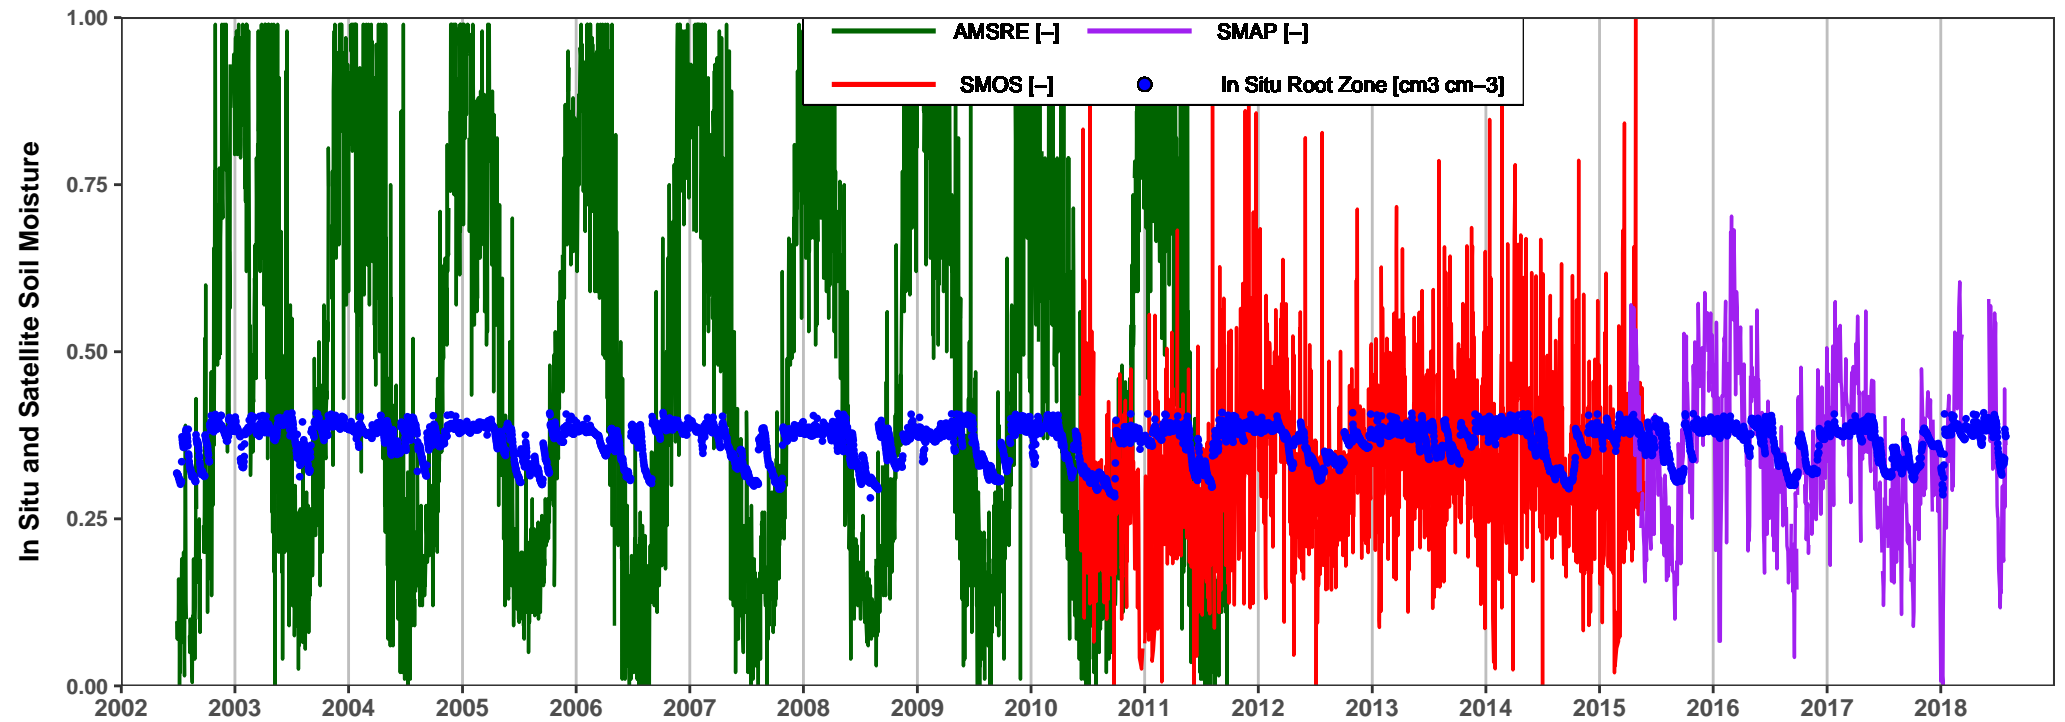

# Site: PeeDee

## AMSRE Average

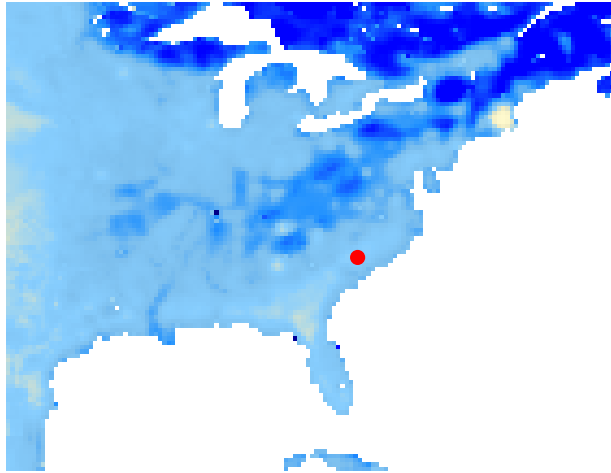

## SMOS Average

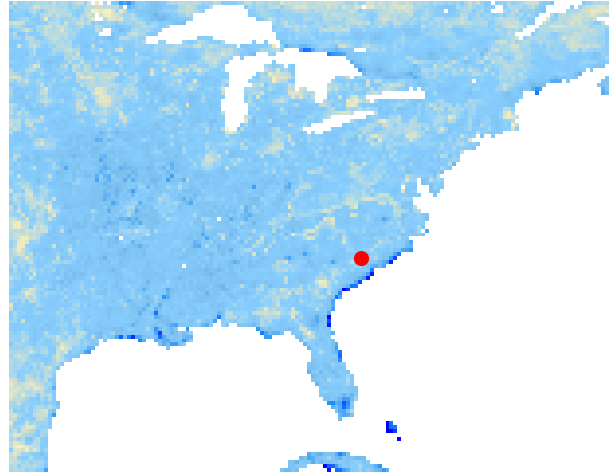

## SMAP Average

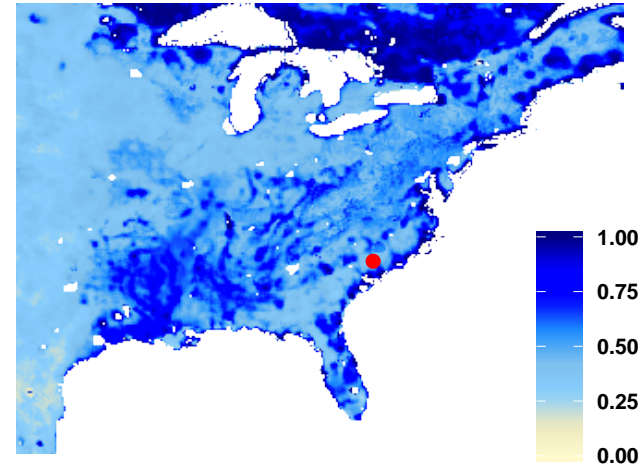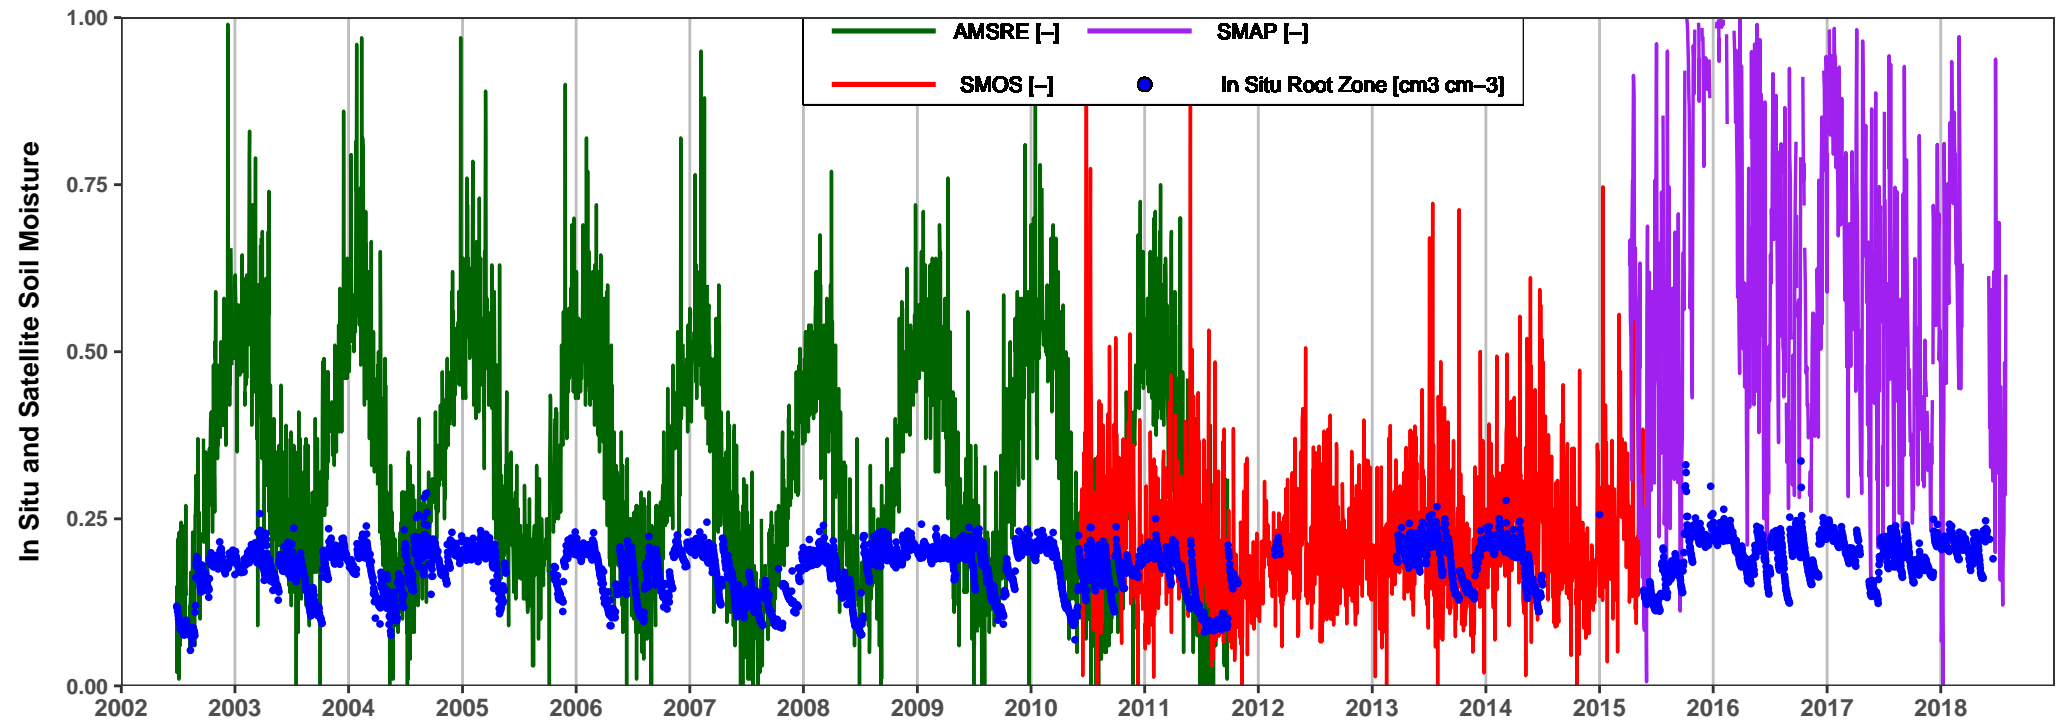

# Site: PerdidoRivFarms

AMSRE Average

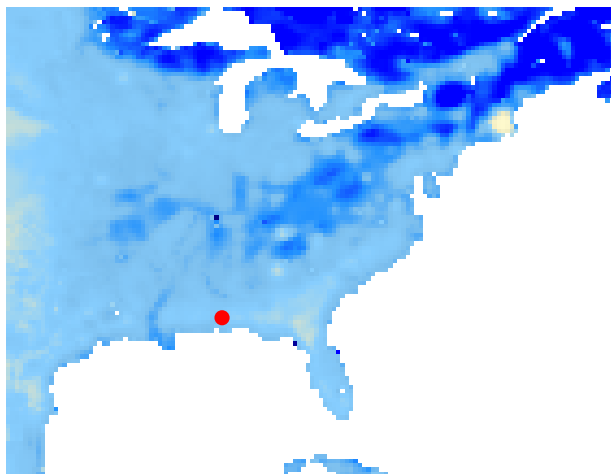

SMOS Average

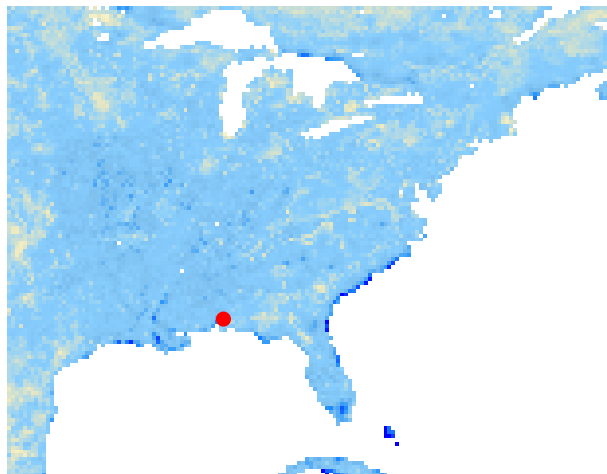

SMAP Average

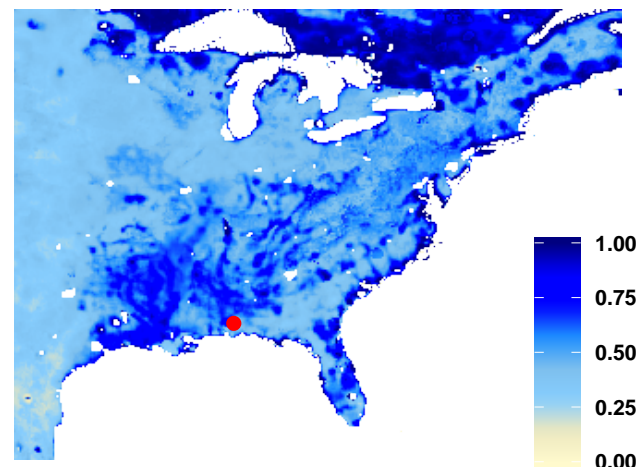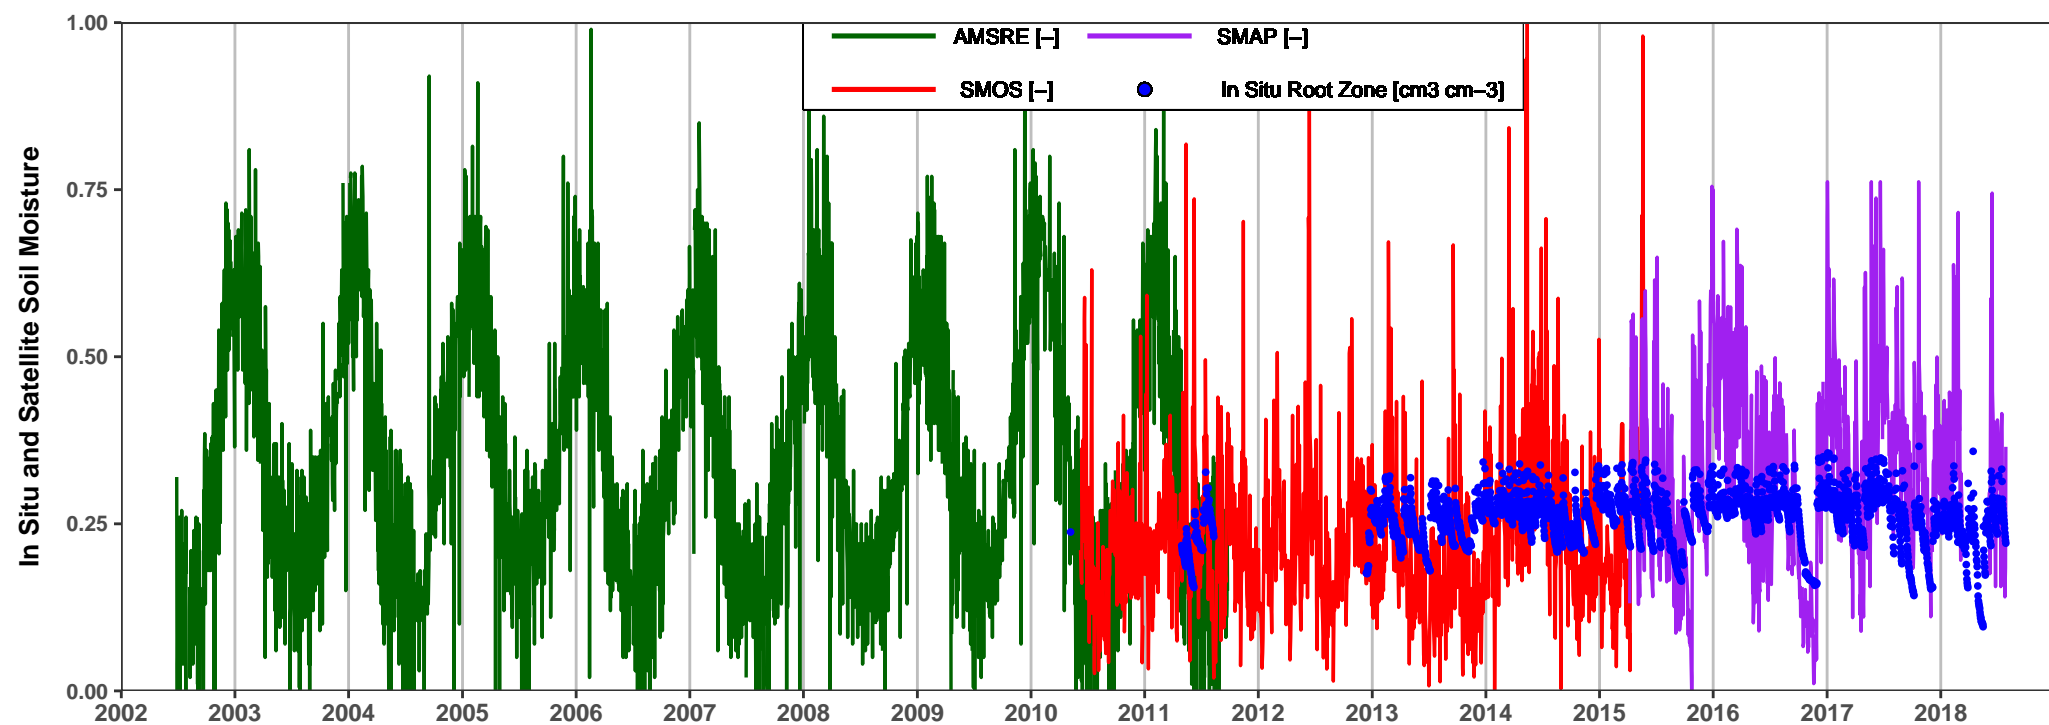



# Site: Perthshire

## AMSRE Average

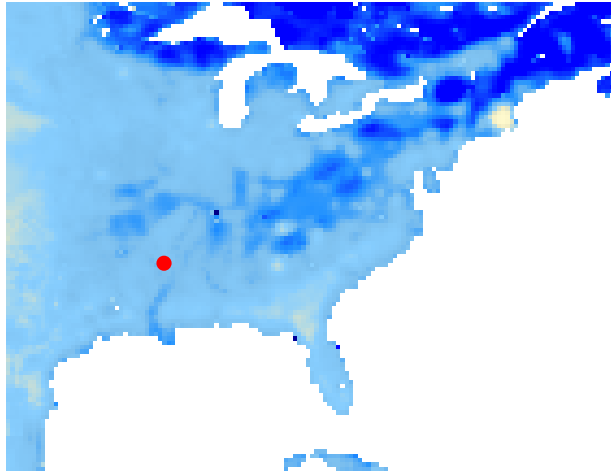

## SMOS Average

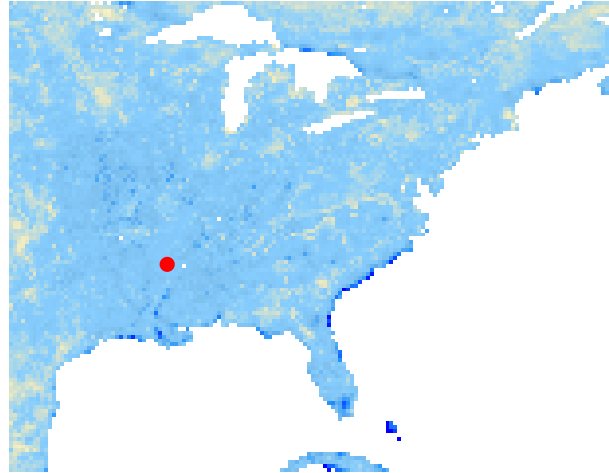

## SMAP Average

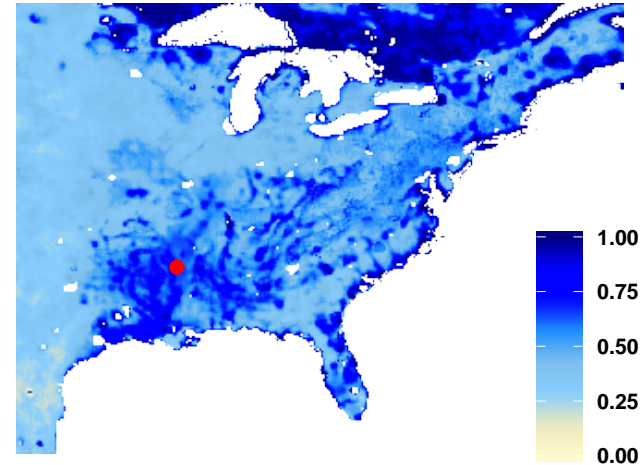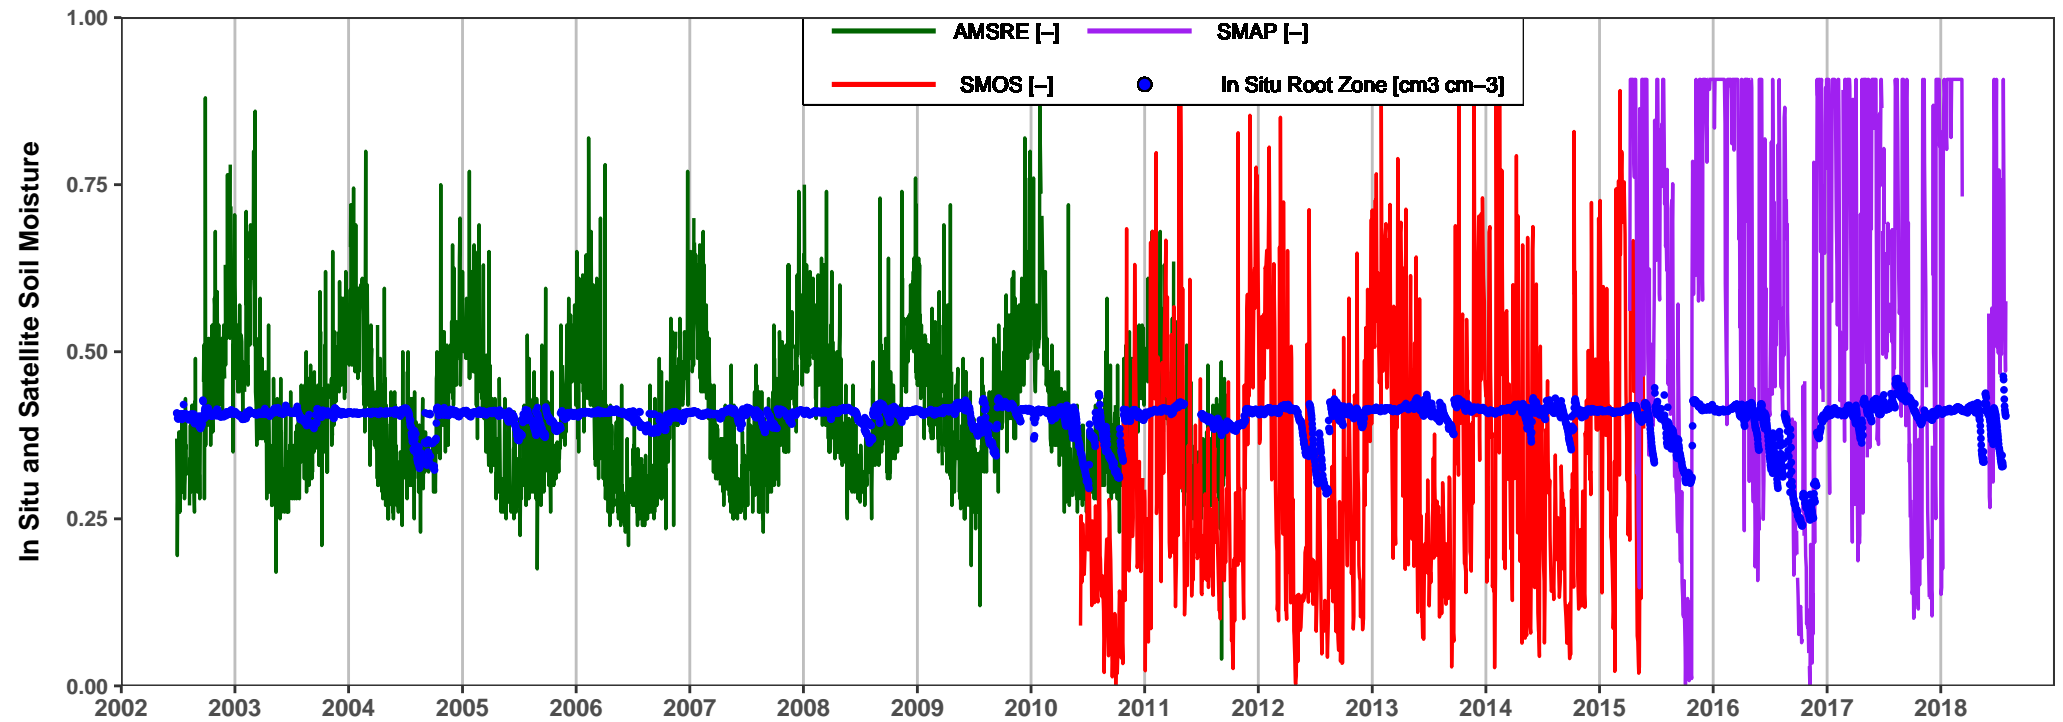

# Site: PowderMill

## AMSRE Average

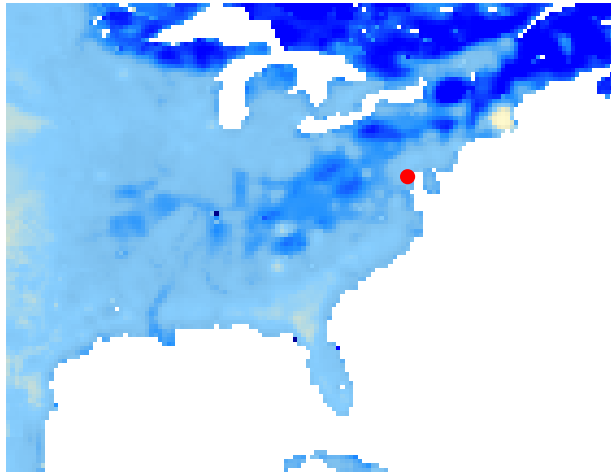

## SMOS Average

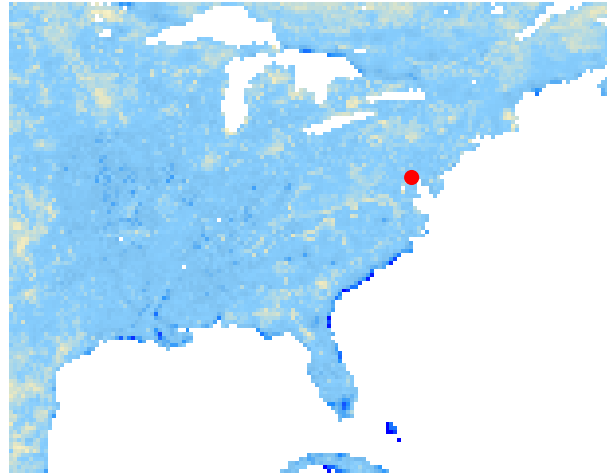

## SMAP Average

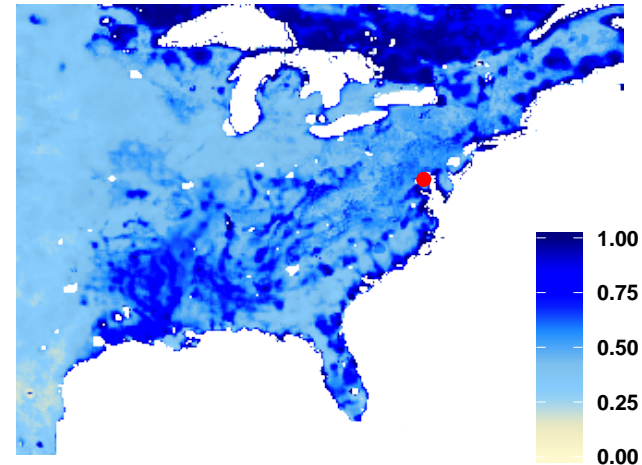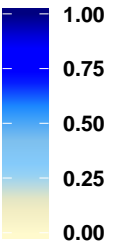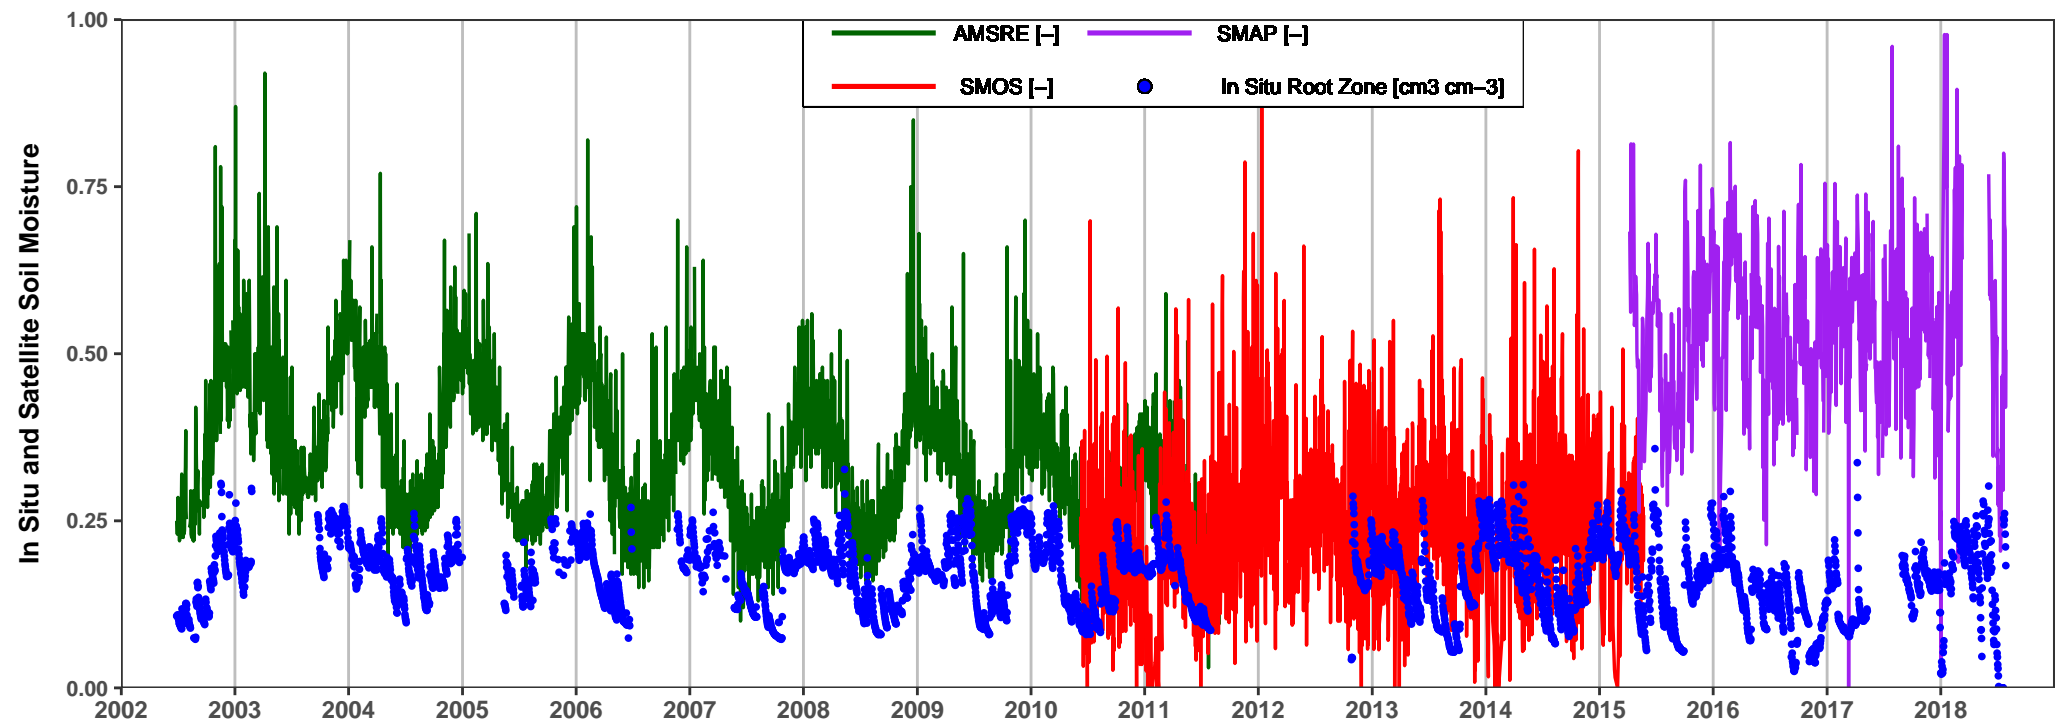

# Site: Princeton1

## AMSRE Average

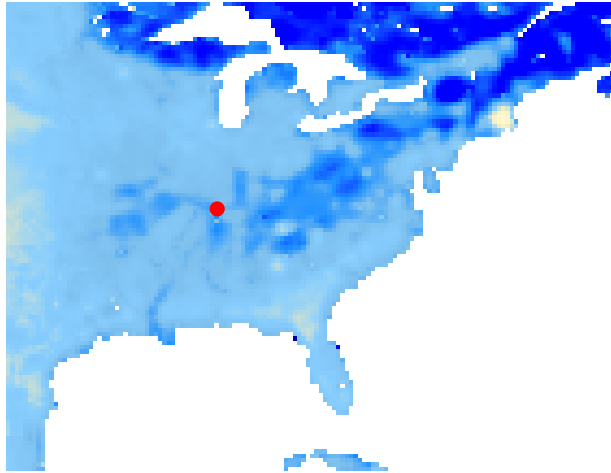

## SMOS Average

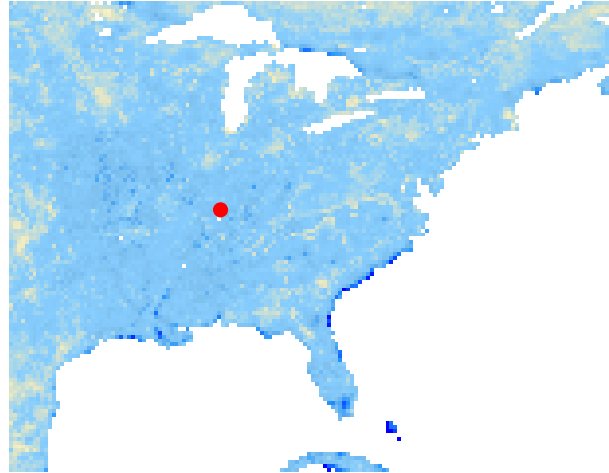

## SMAP Average

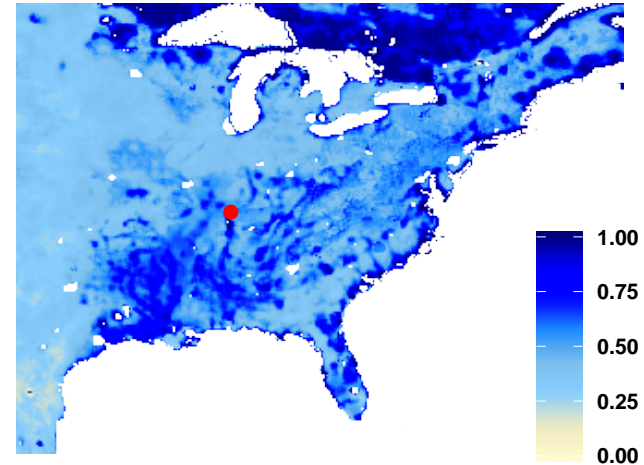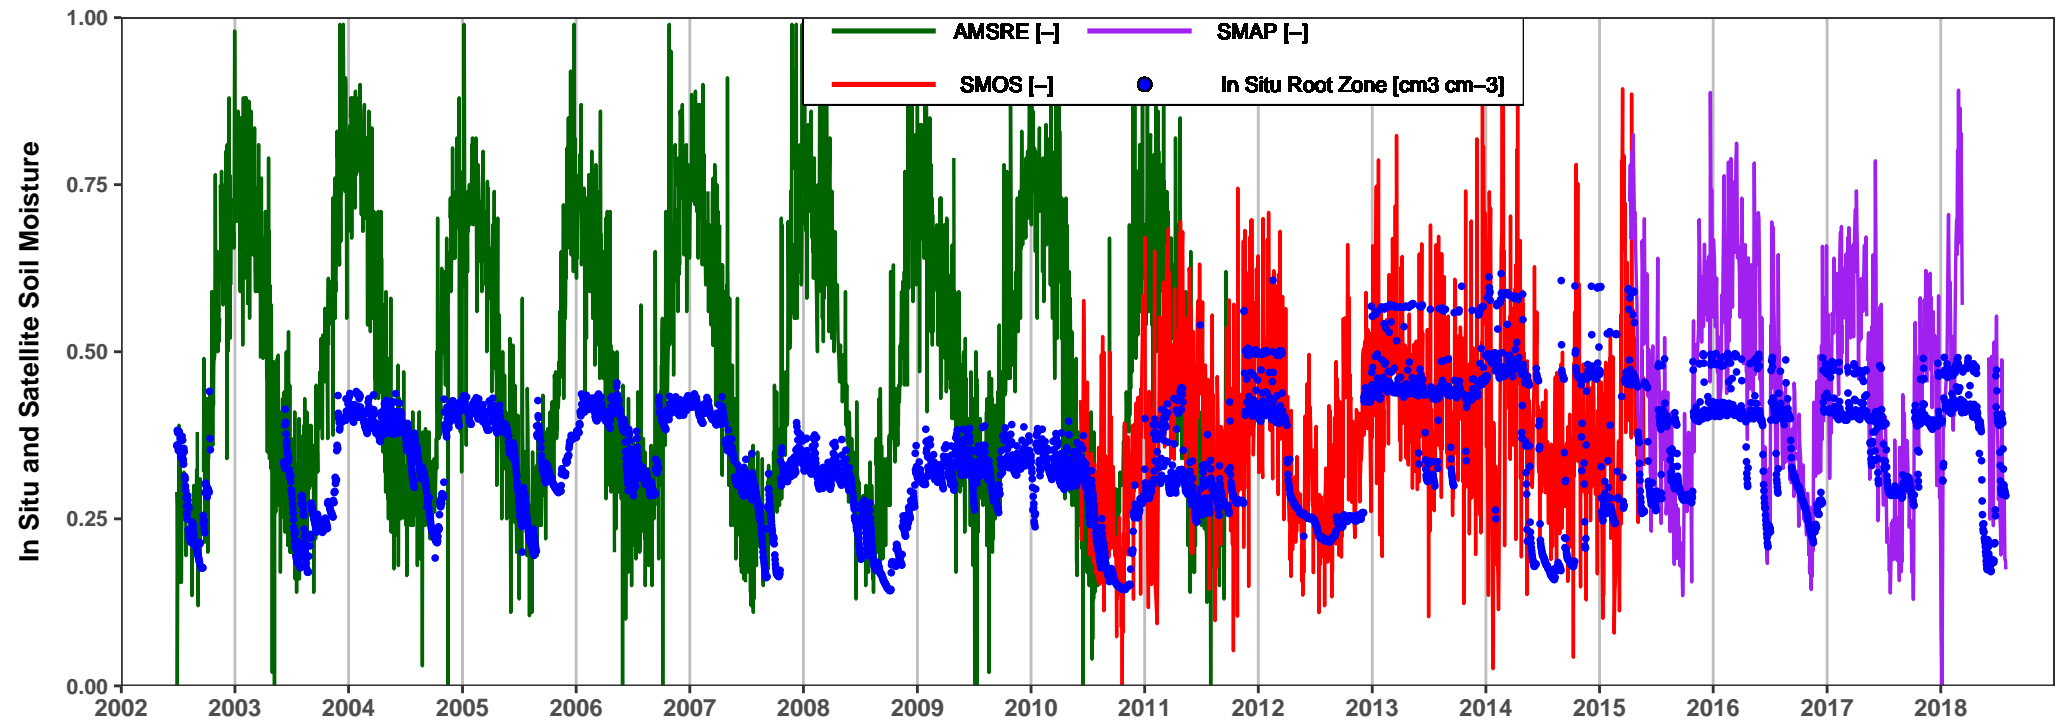

# Site: ReynoldsHomestead

AMSRE Average

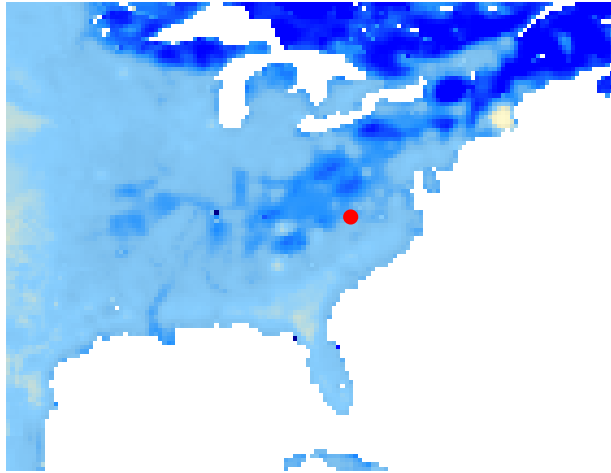

SMOS Average

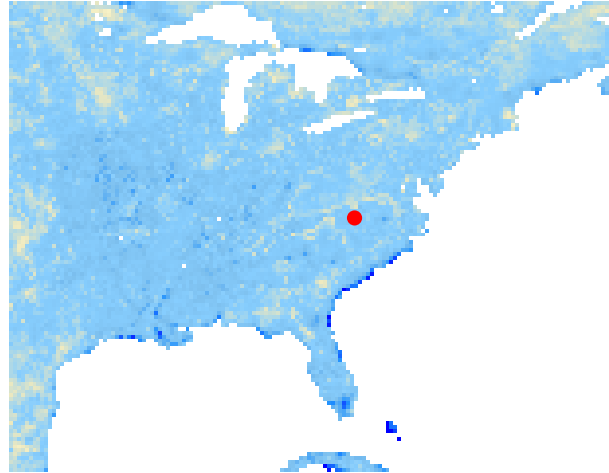

SMAP Average

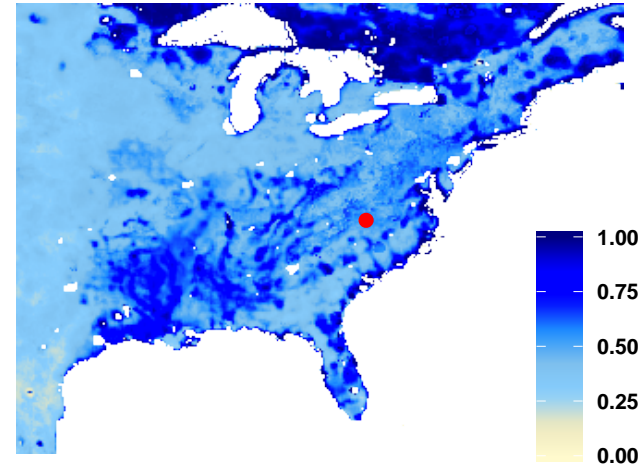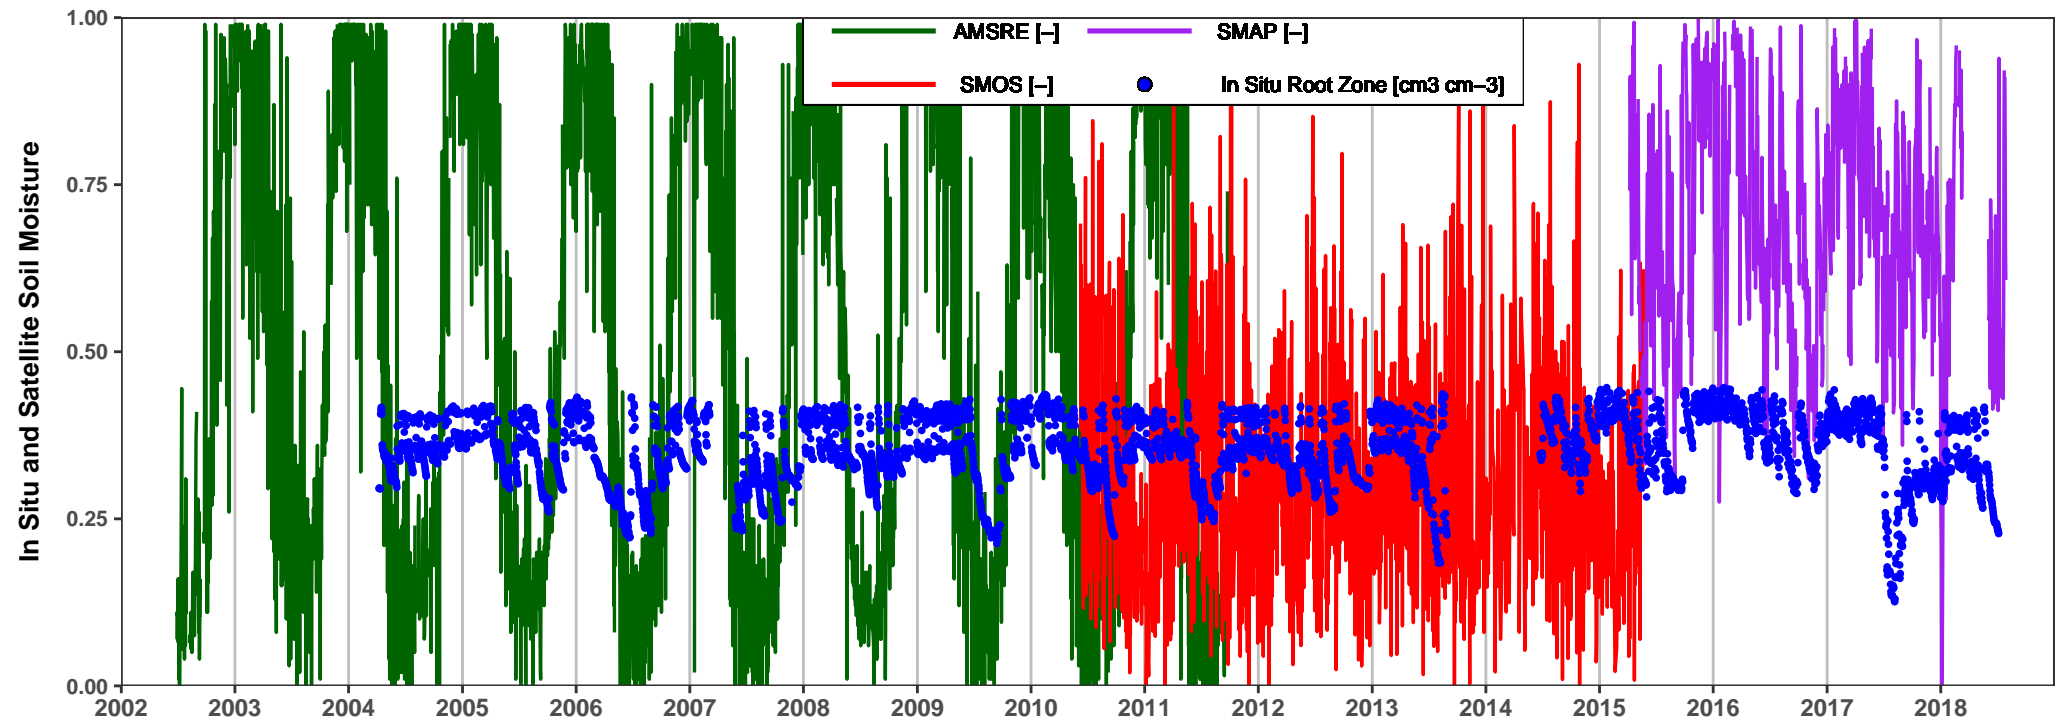

# Site: RockSprings

## AMSRE Average

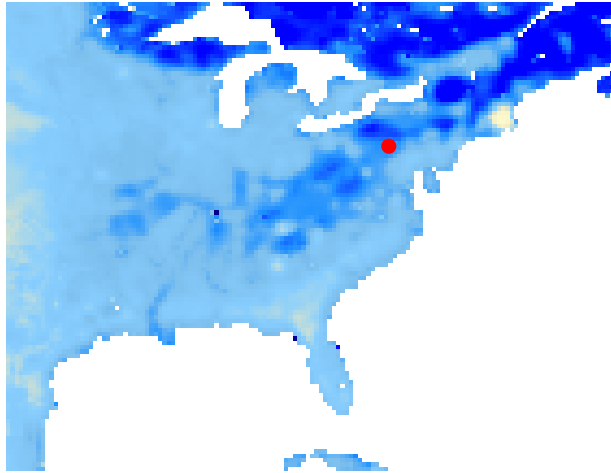

## SMOS Average

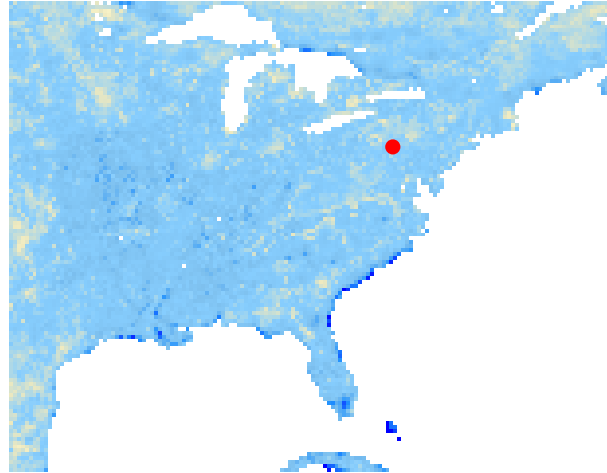

## SMAP Average

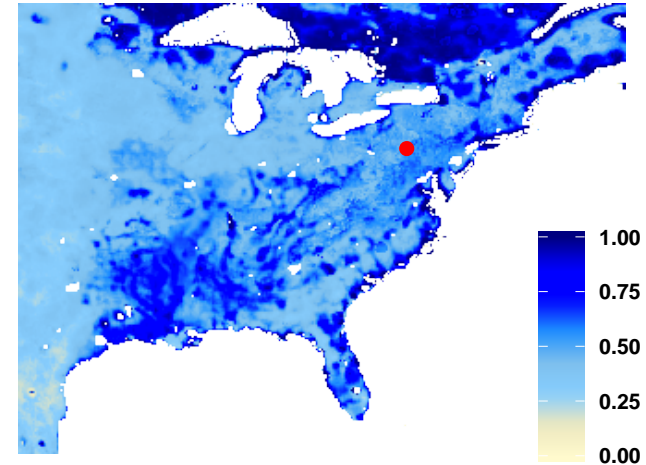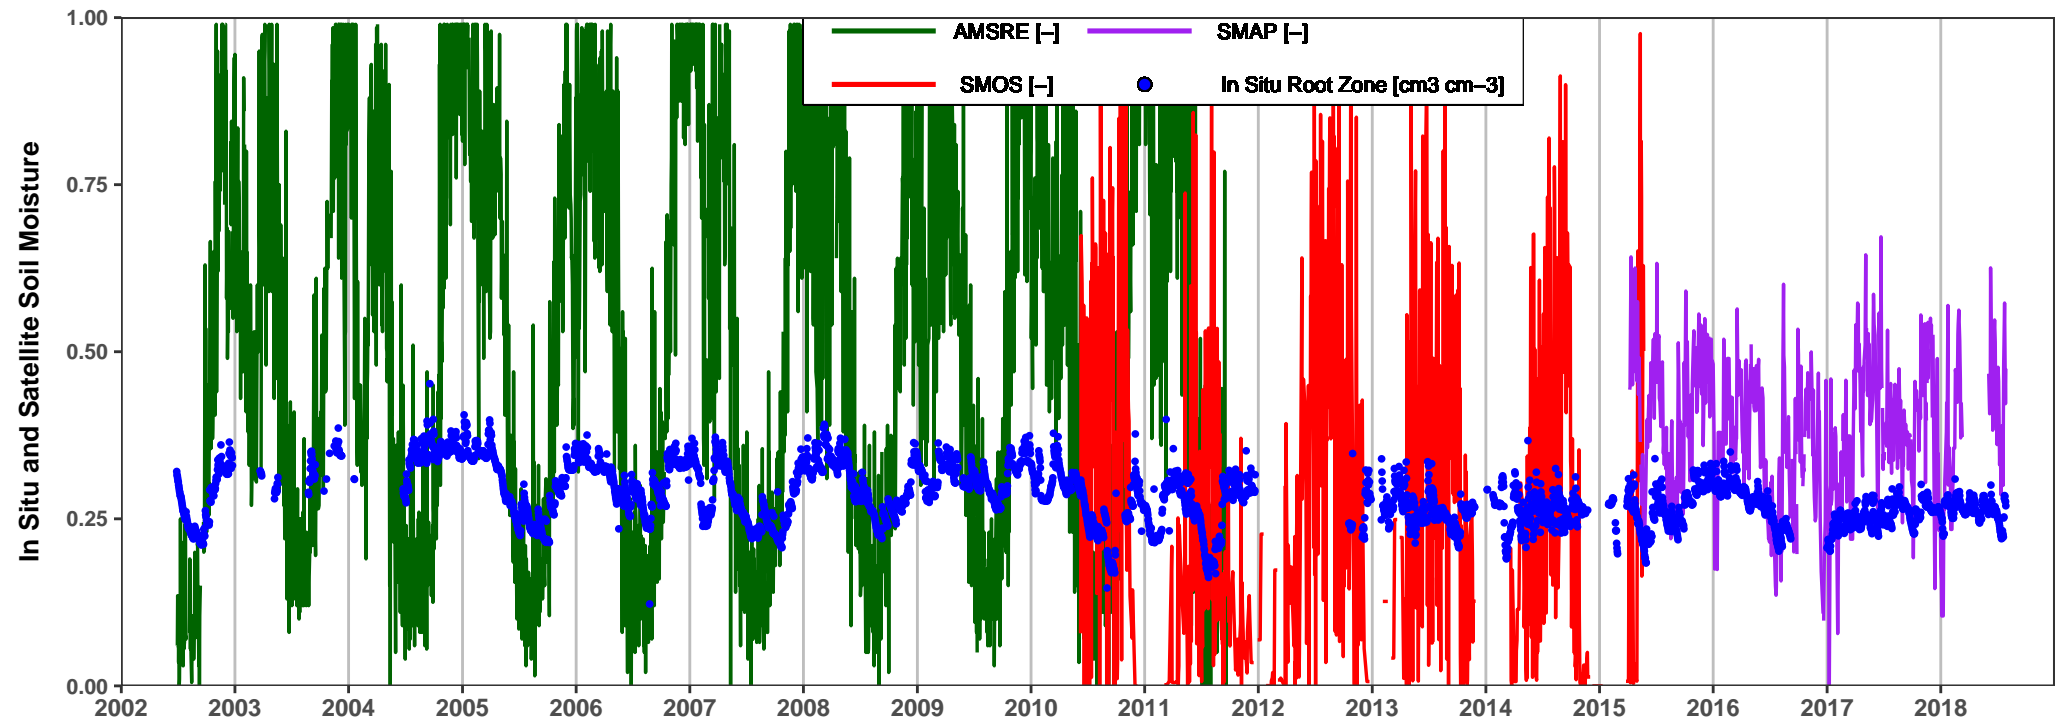

# Site: SandyRidge

AMSRE Average

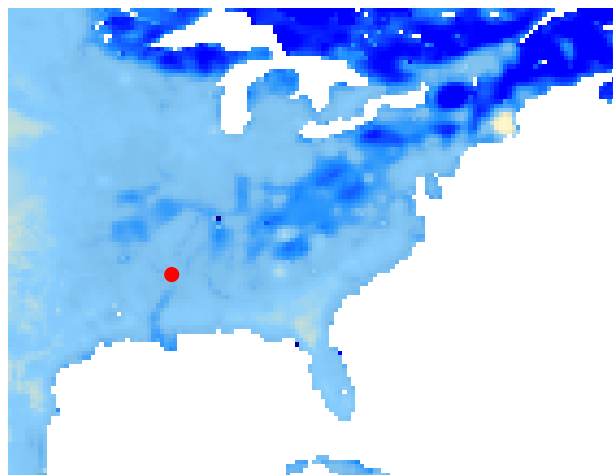

SMOS Average

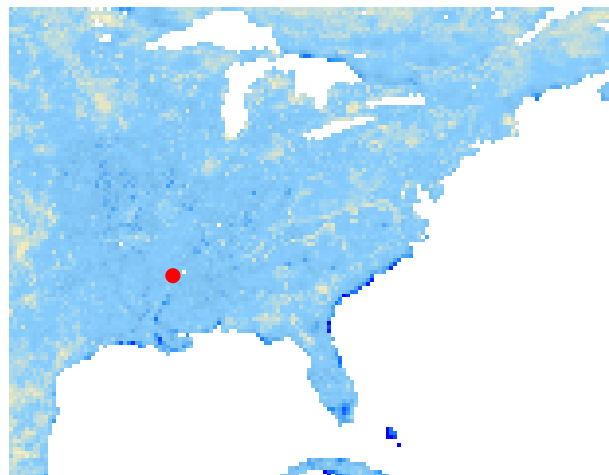

SMAP Average

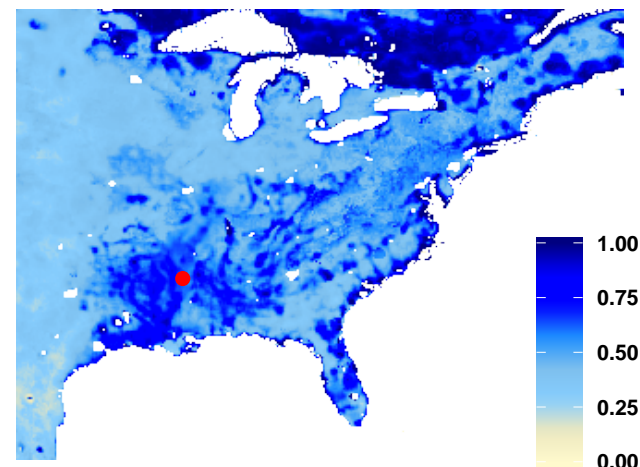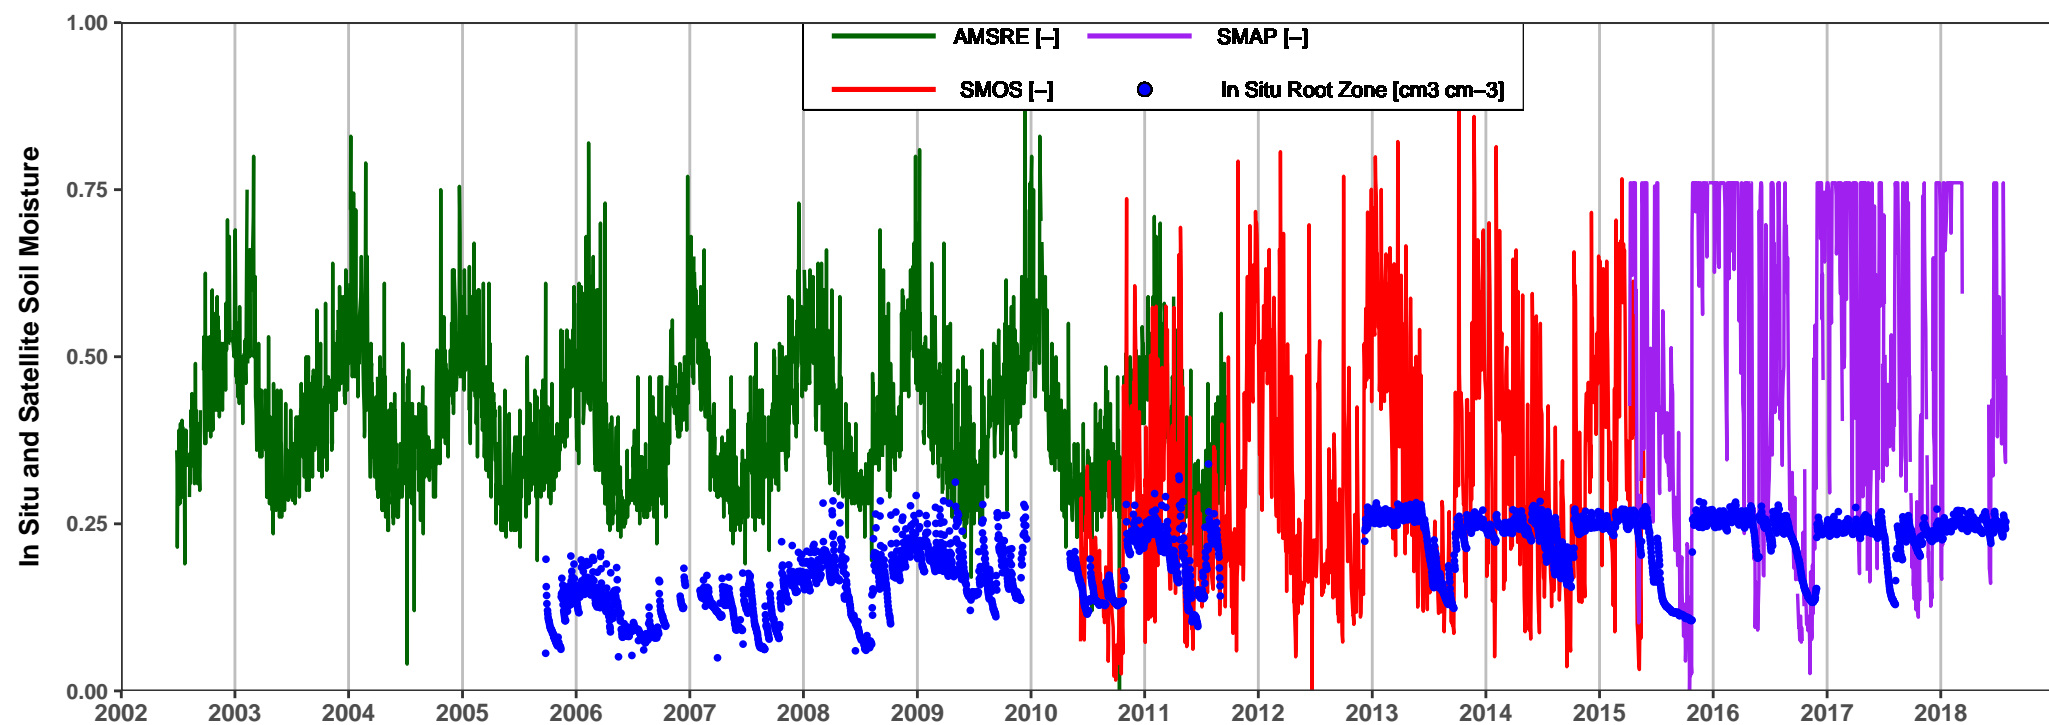

# Site: Scott

## AMSRE Average

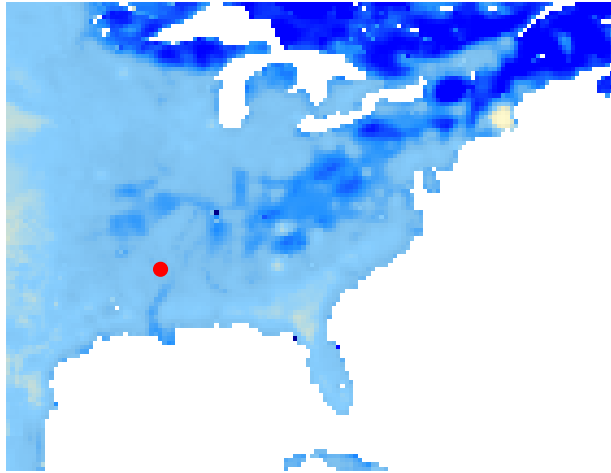

## SMOS Average

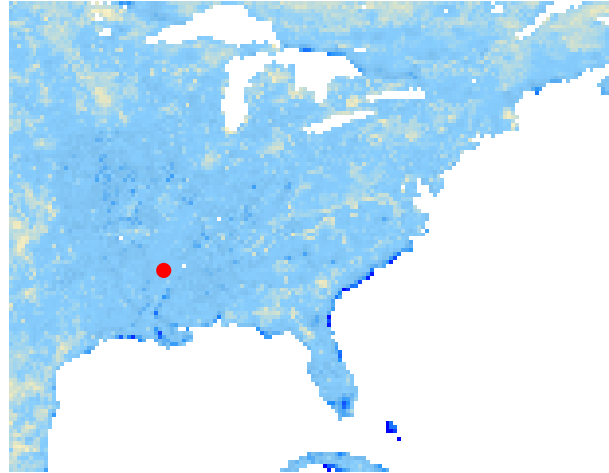

## SMAP Average

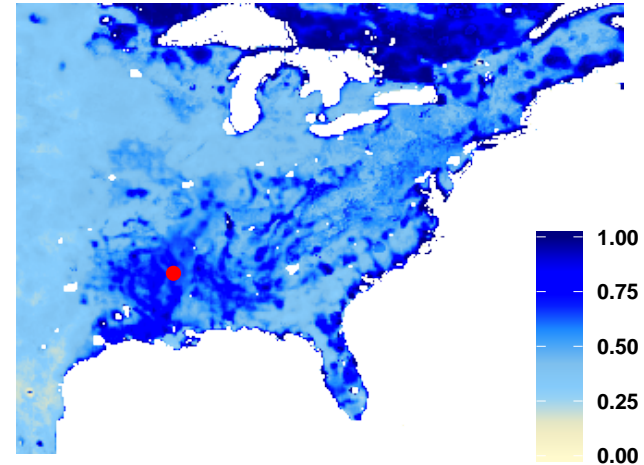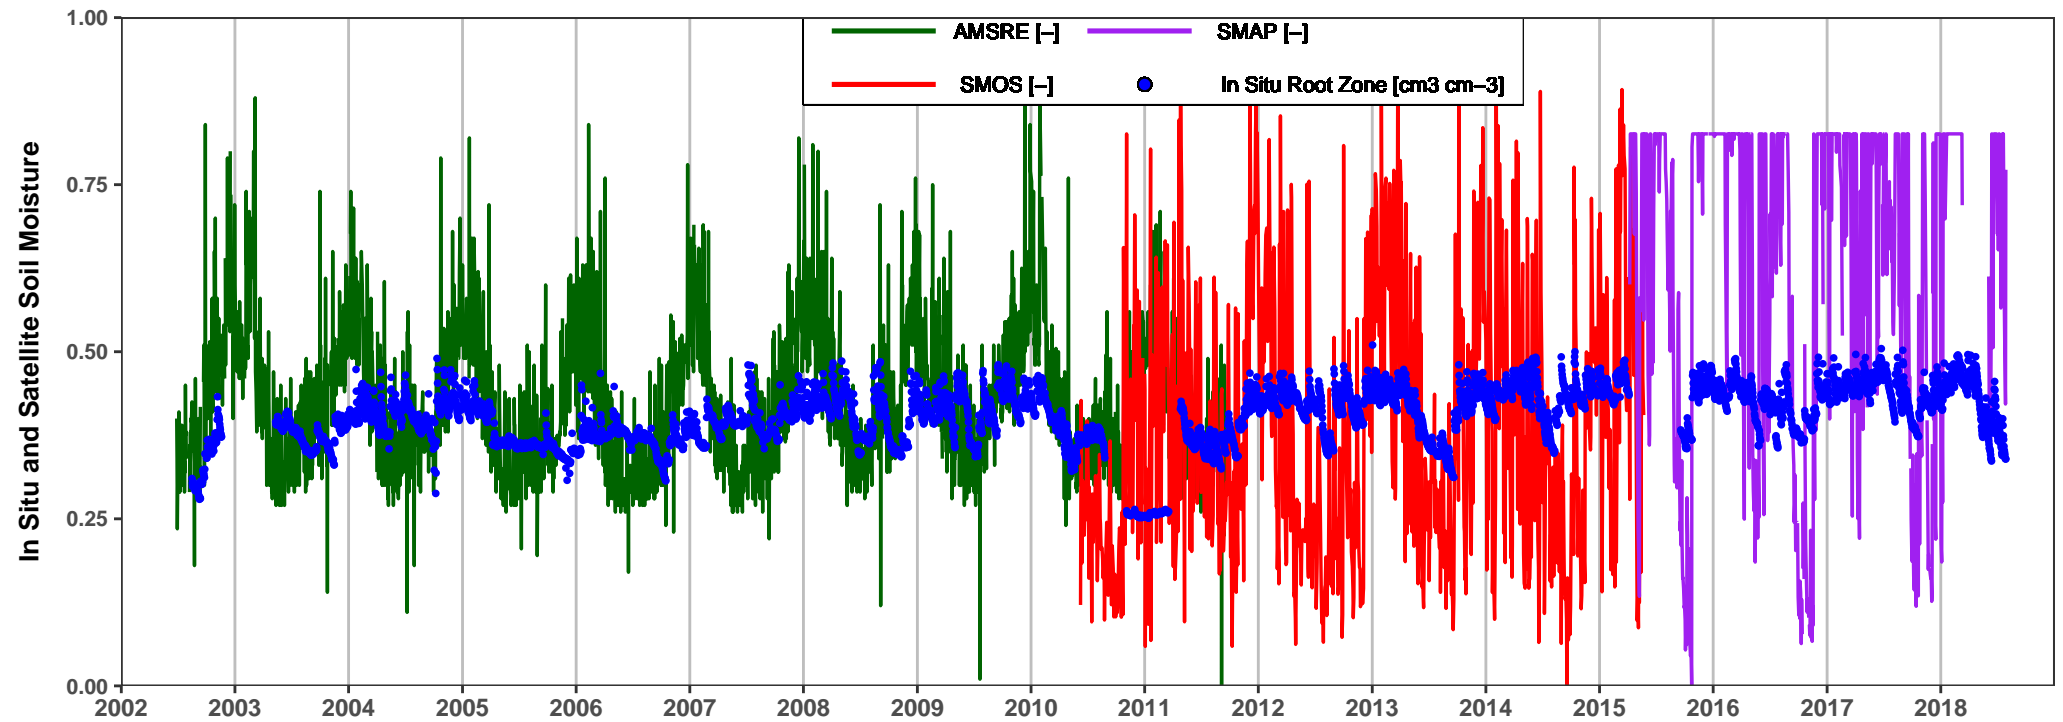



# Site: SellersLake1

AMSRE Average

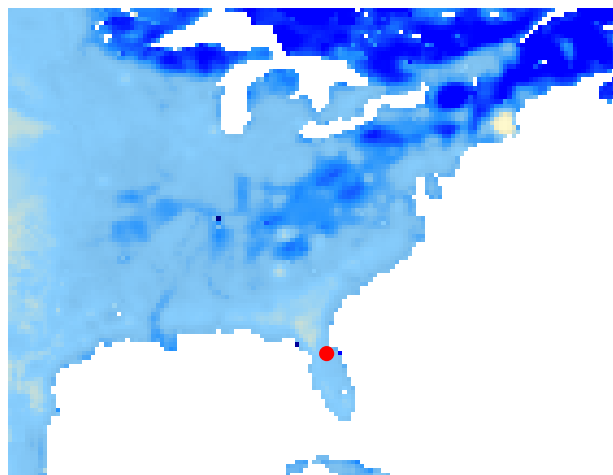

SMOS Average

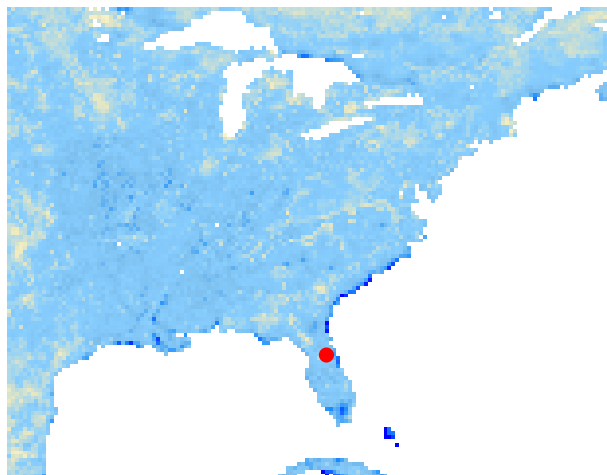

SMAP Average

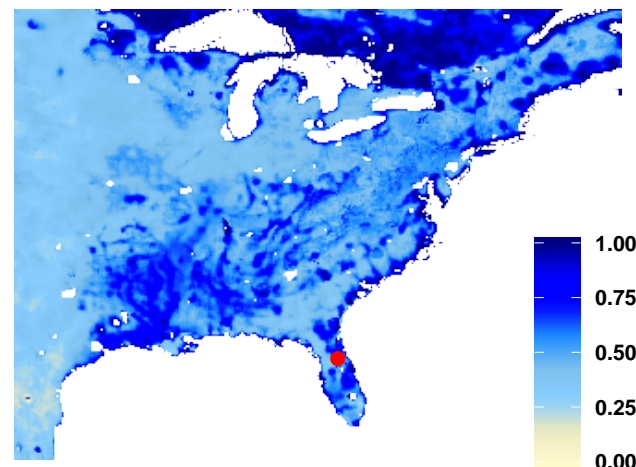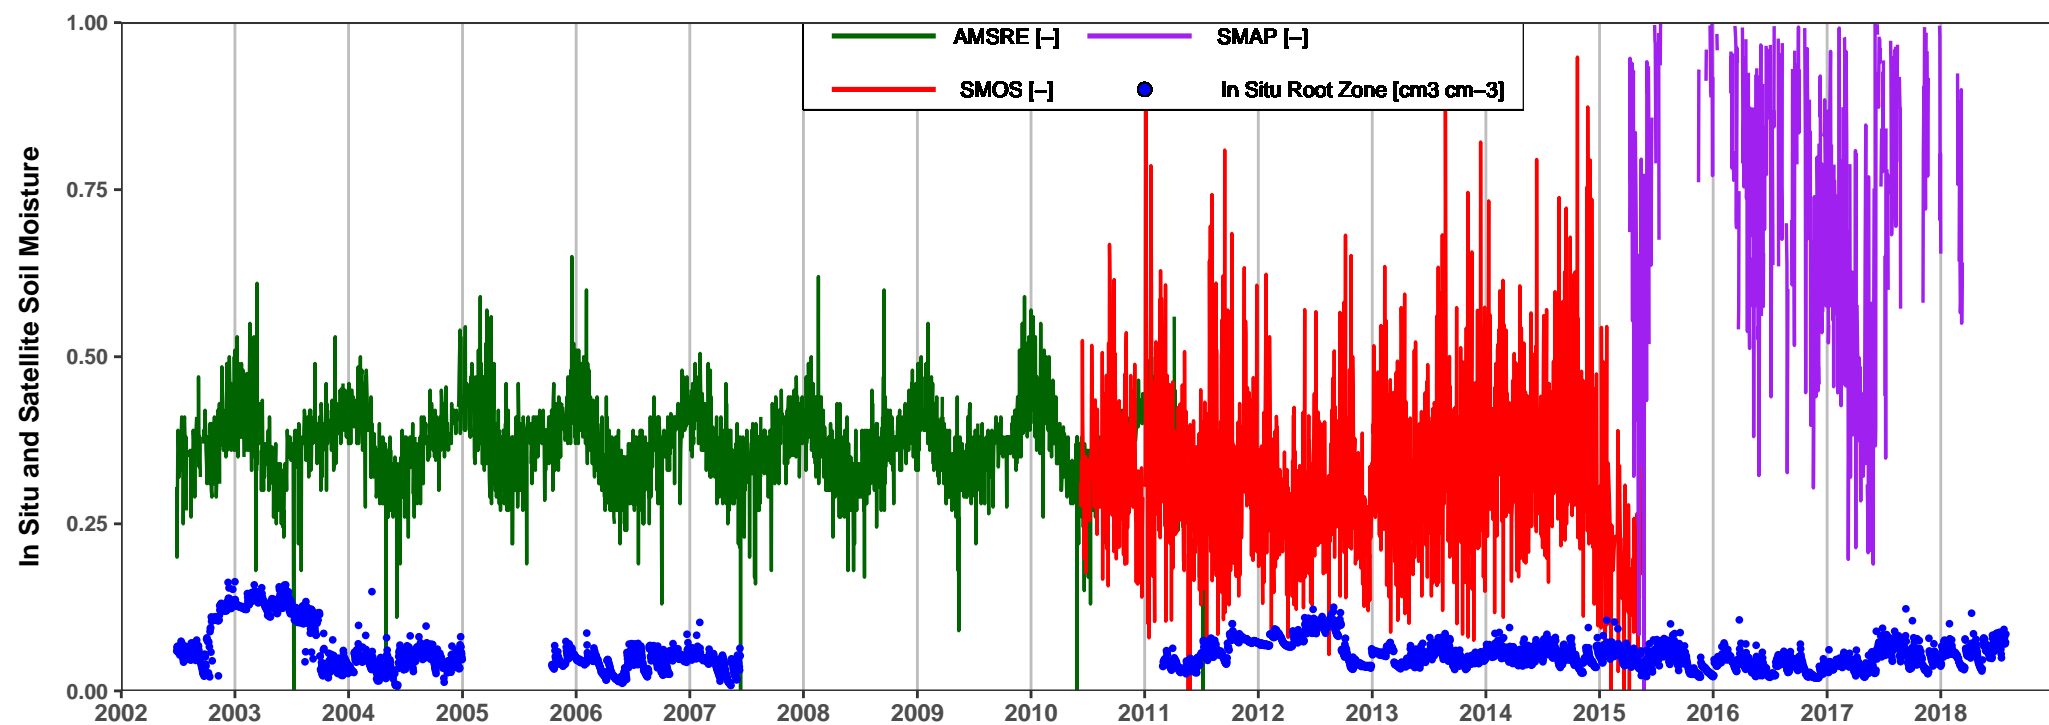

# Site: Selma

## AMSRE Average

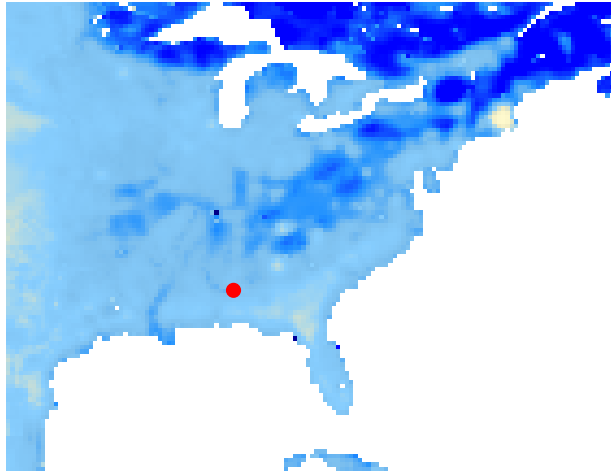

## SMOS Average

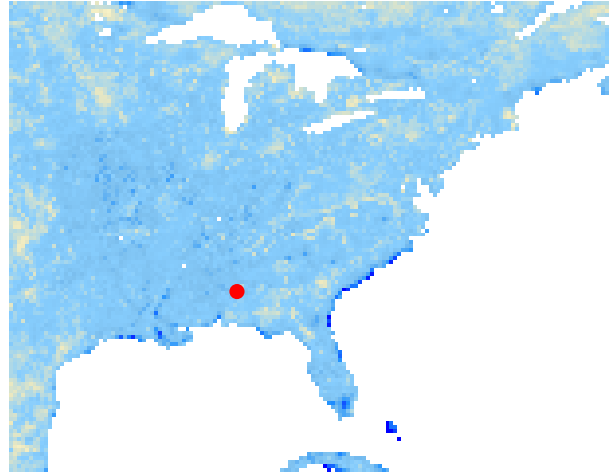

## SMAP Average

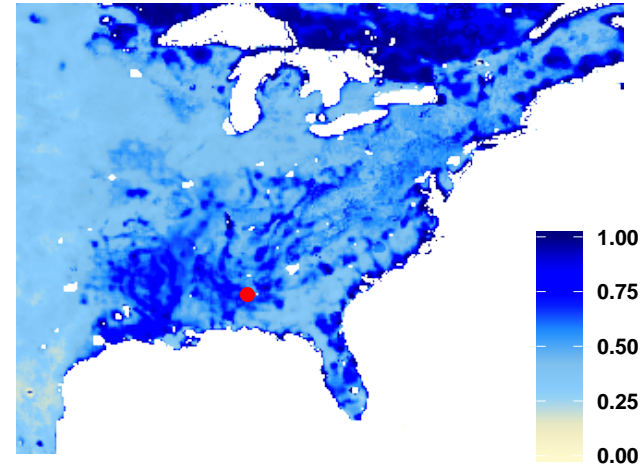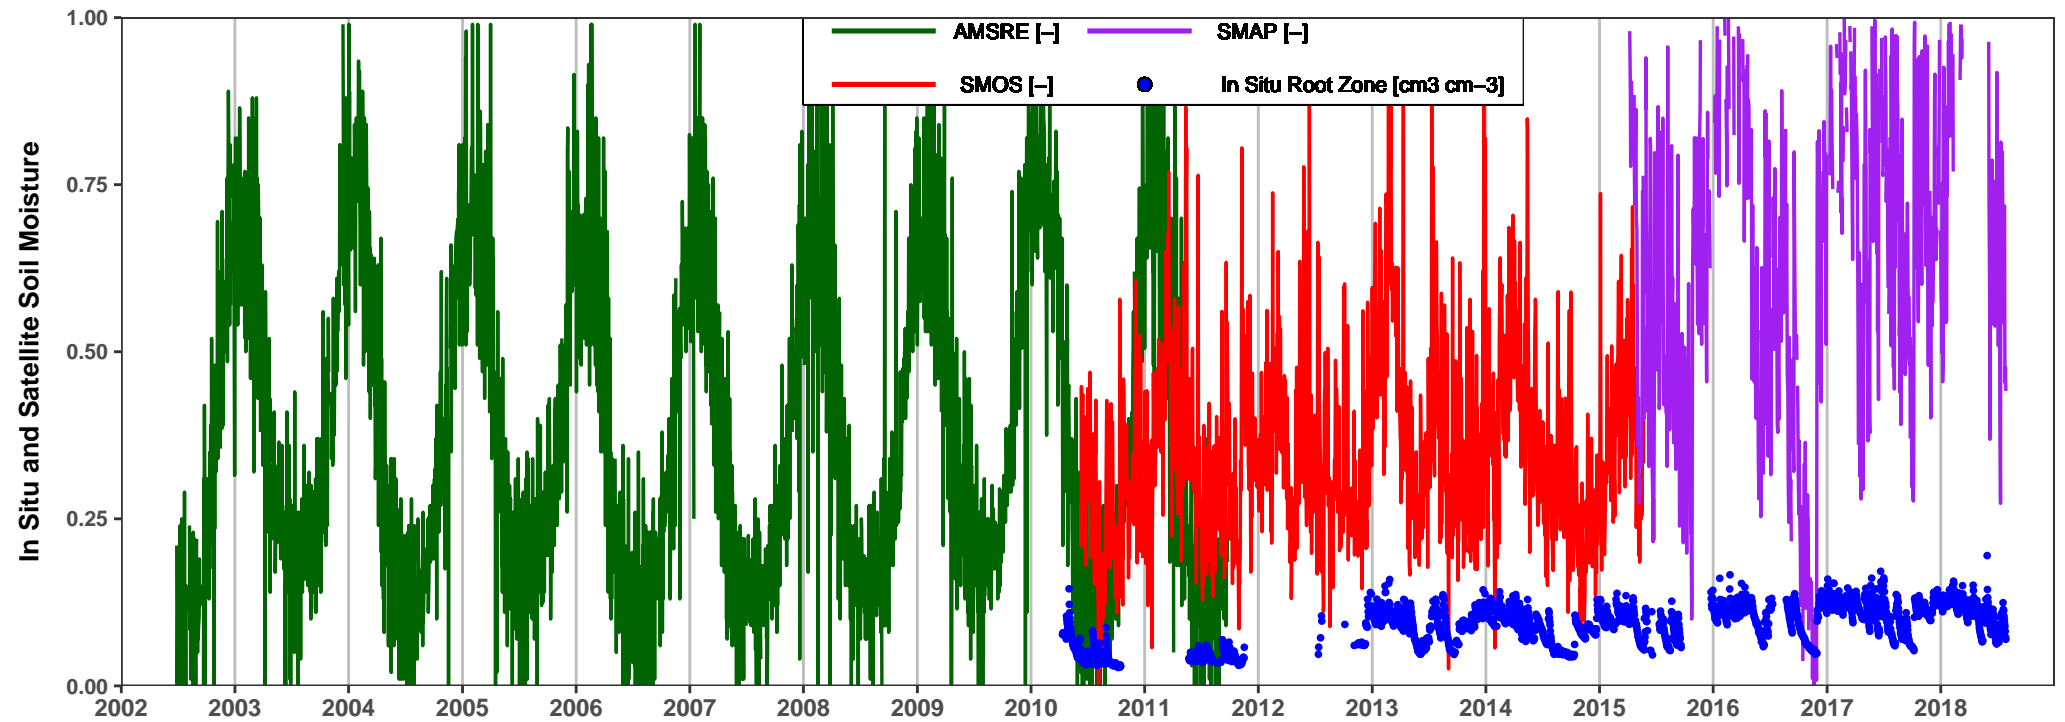

# Site: Shenandoah

## AMSRE Average

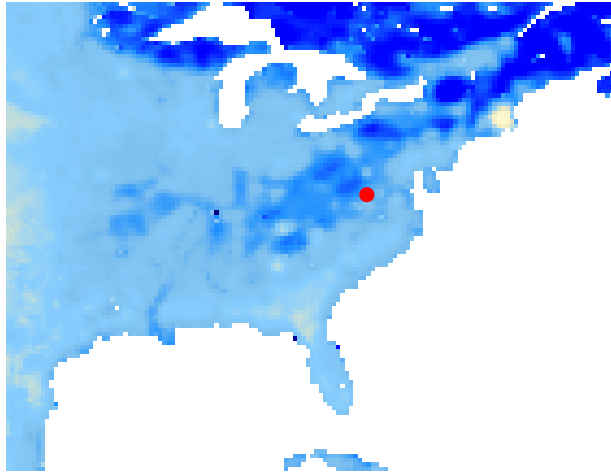

## SMOS Average

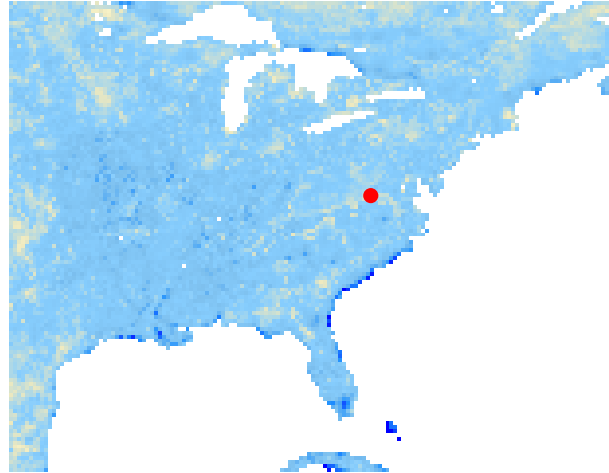

## SMAP Average

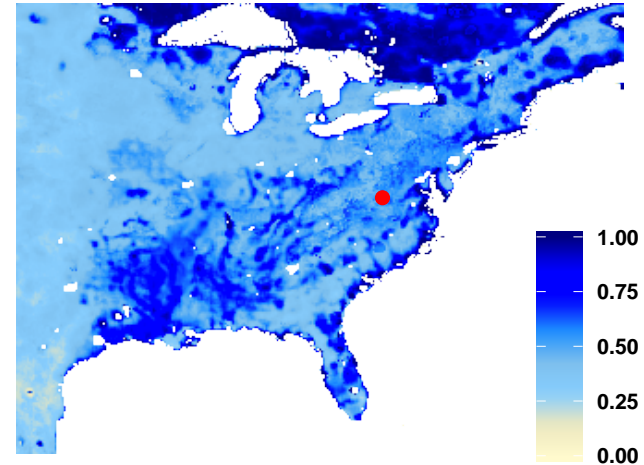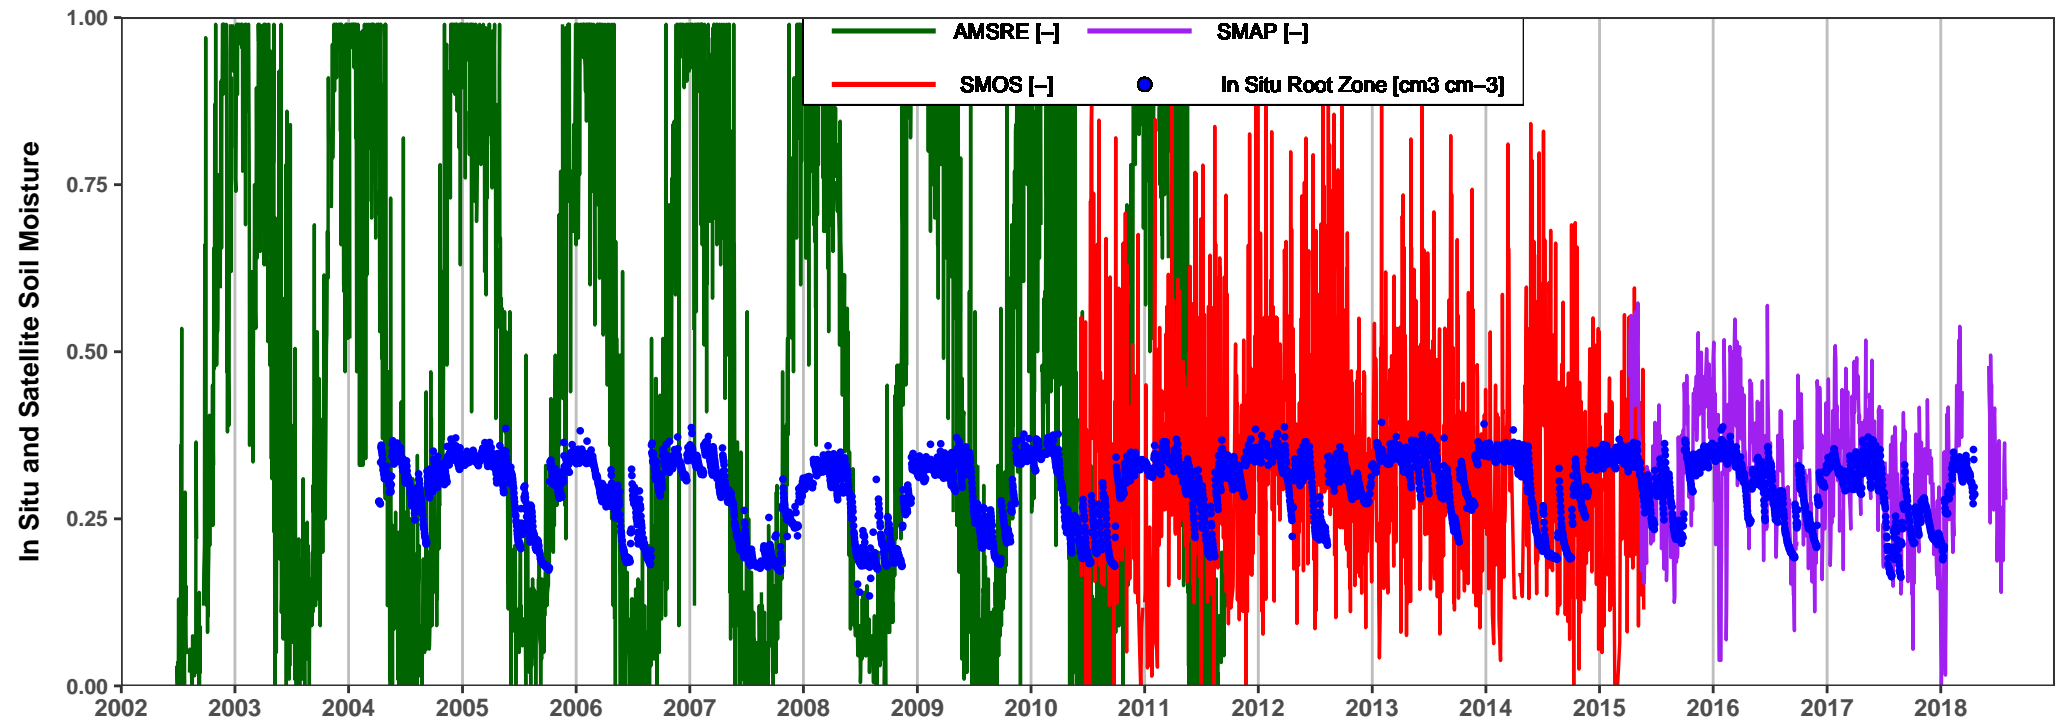

# Site: SilverCity

## AMSRE Average

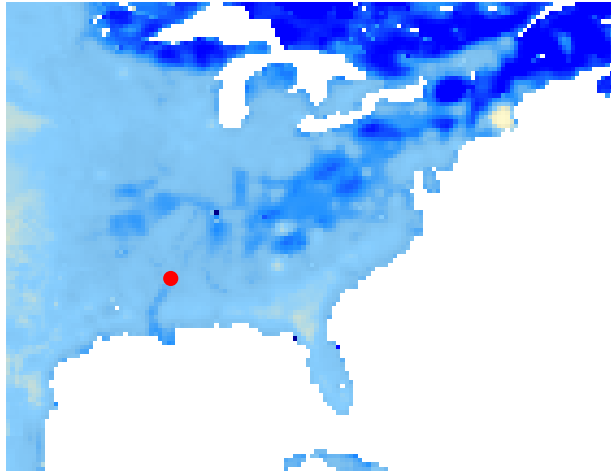

## SMOS Average

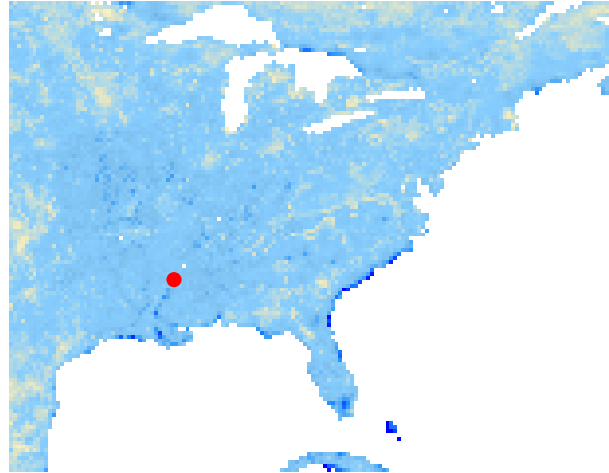

## SMAP Average

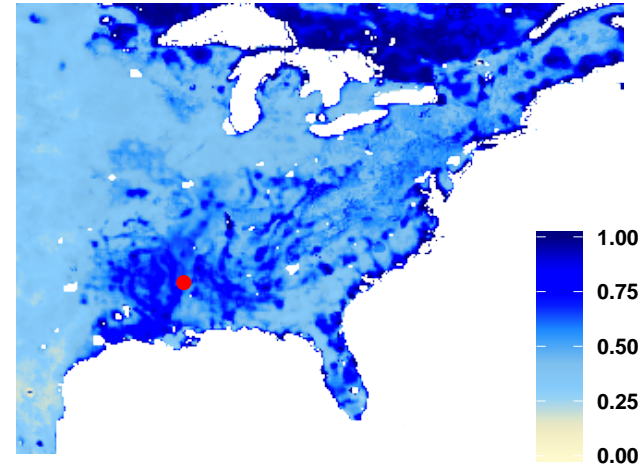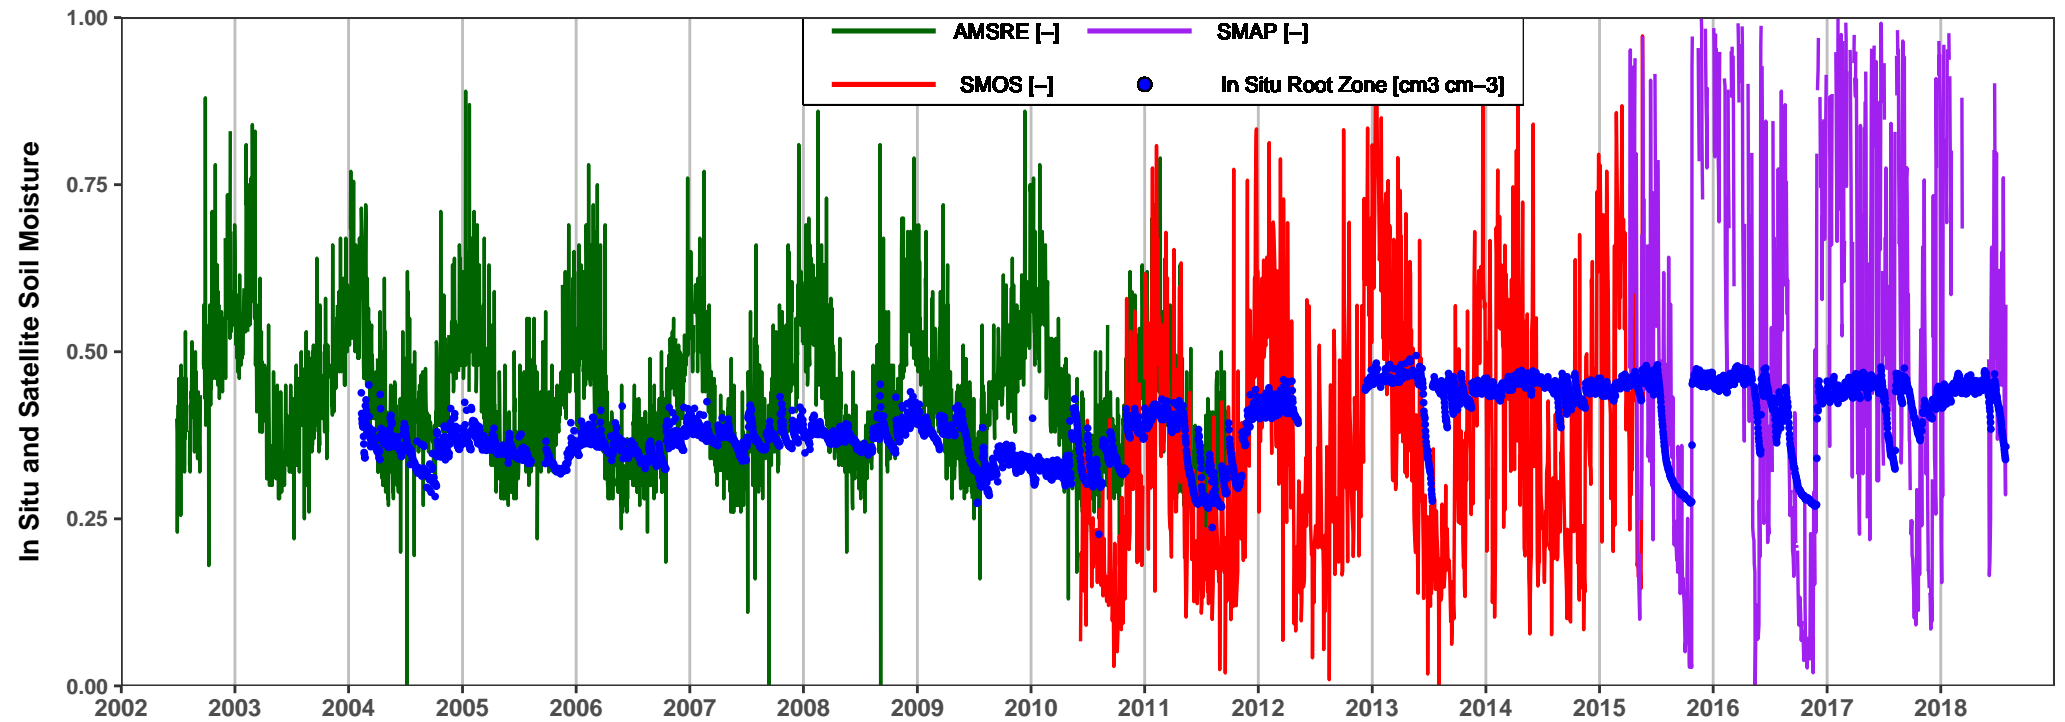

# Site: StanleyFarm

AMSRE Average

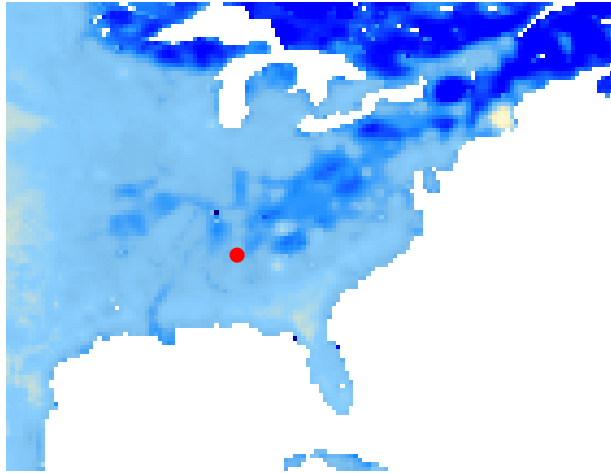

SMOS Average

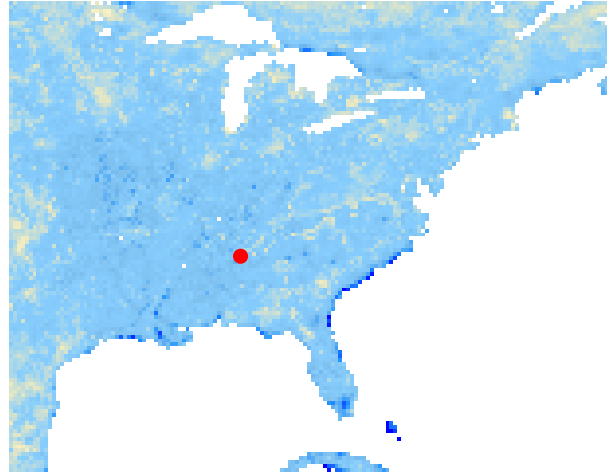

SMAP Average

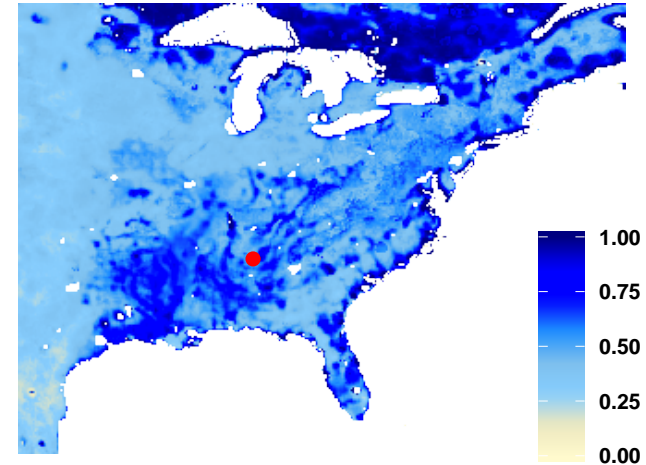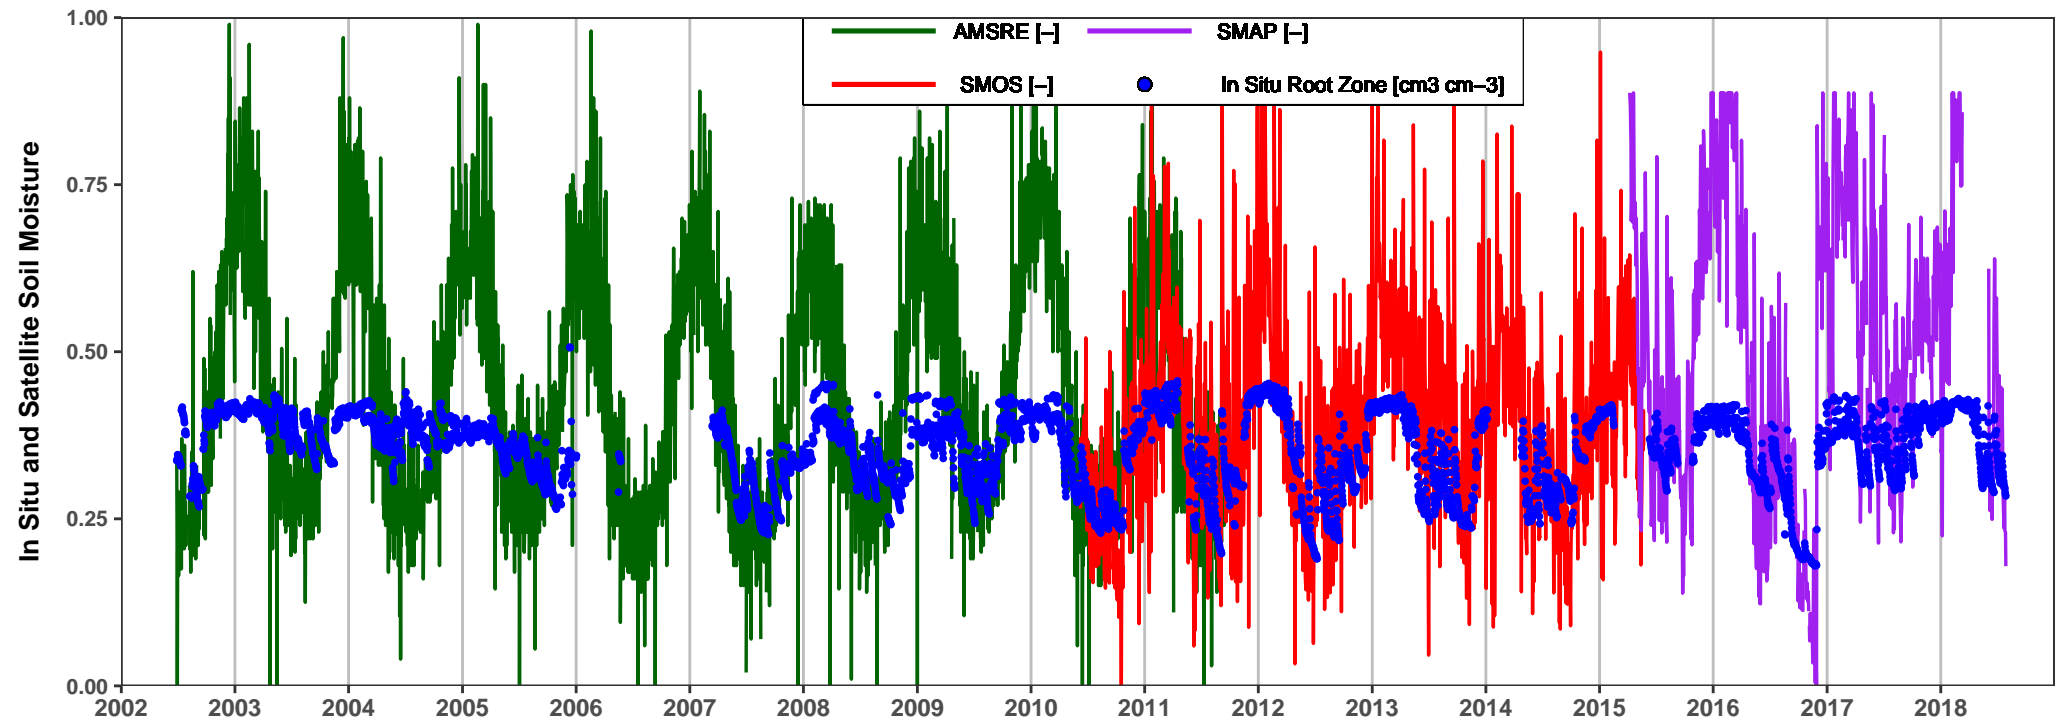

# Site: Starkville

## AMSRE Average

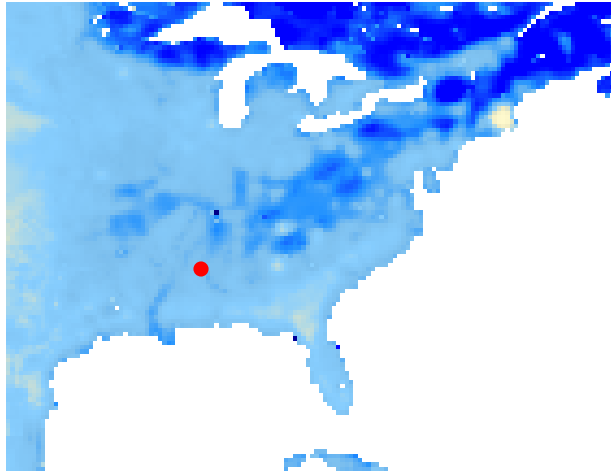

## SMOS Average

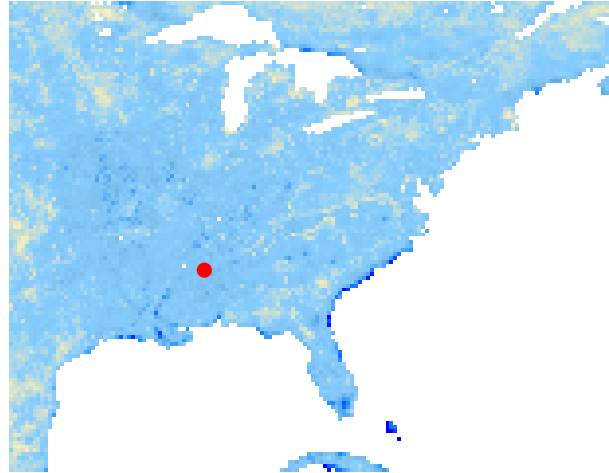

## SMAP Average

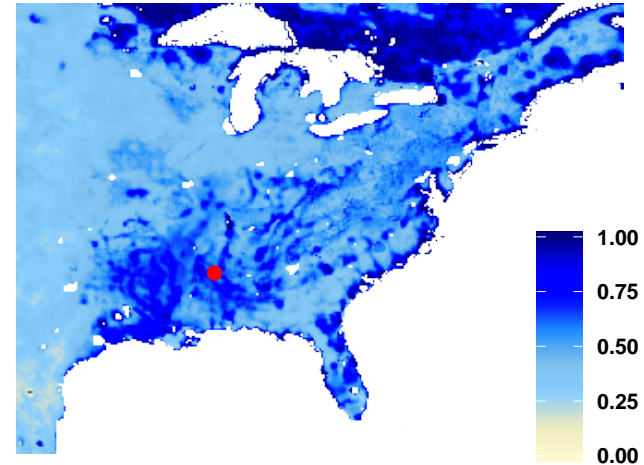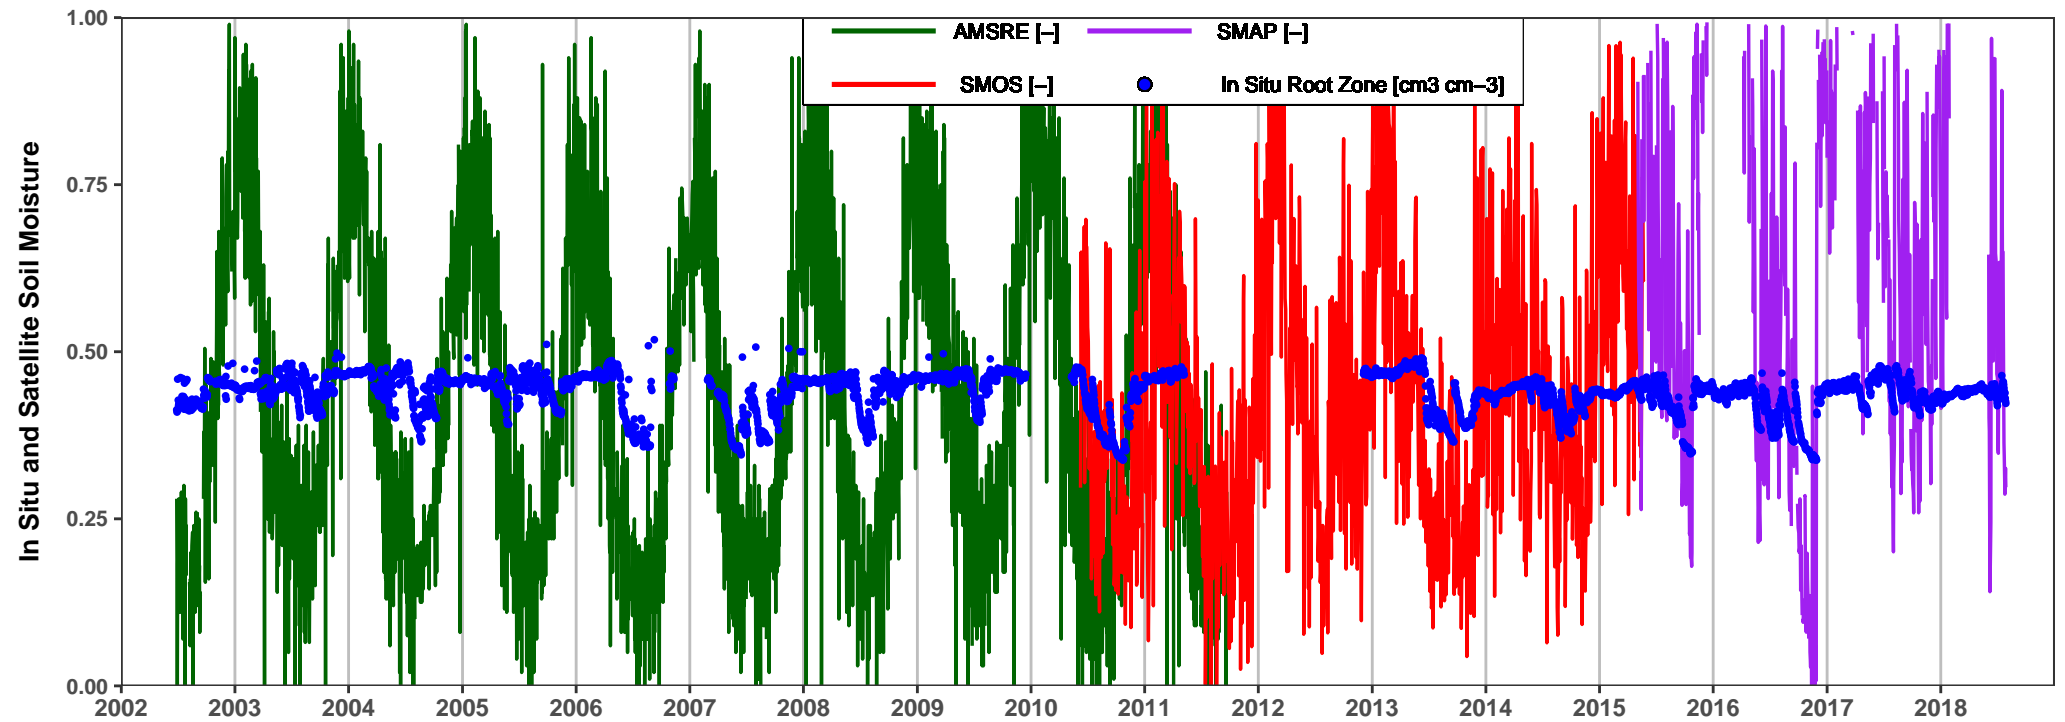

# Site: SudduthFarms

AMSRE Average

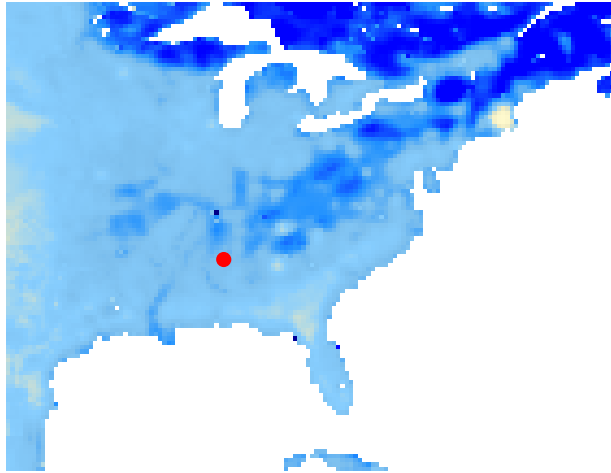

SMOS Average

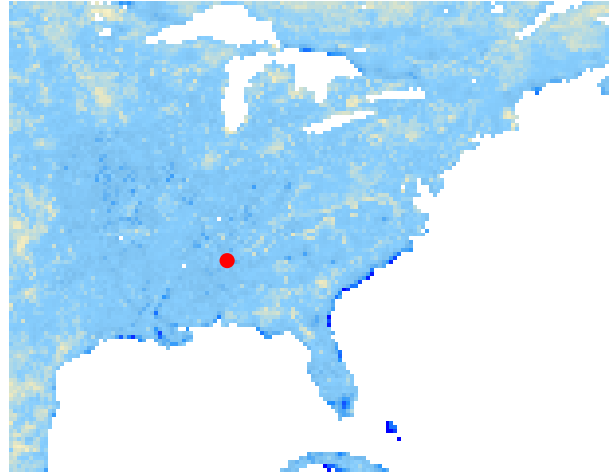

SMAP Average

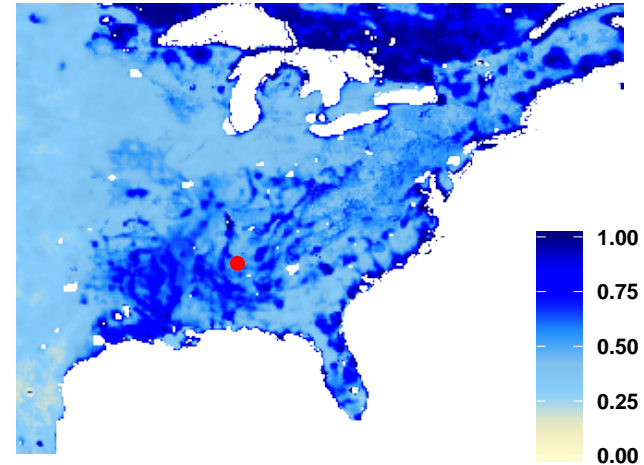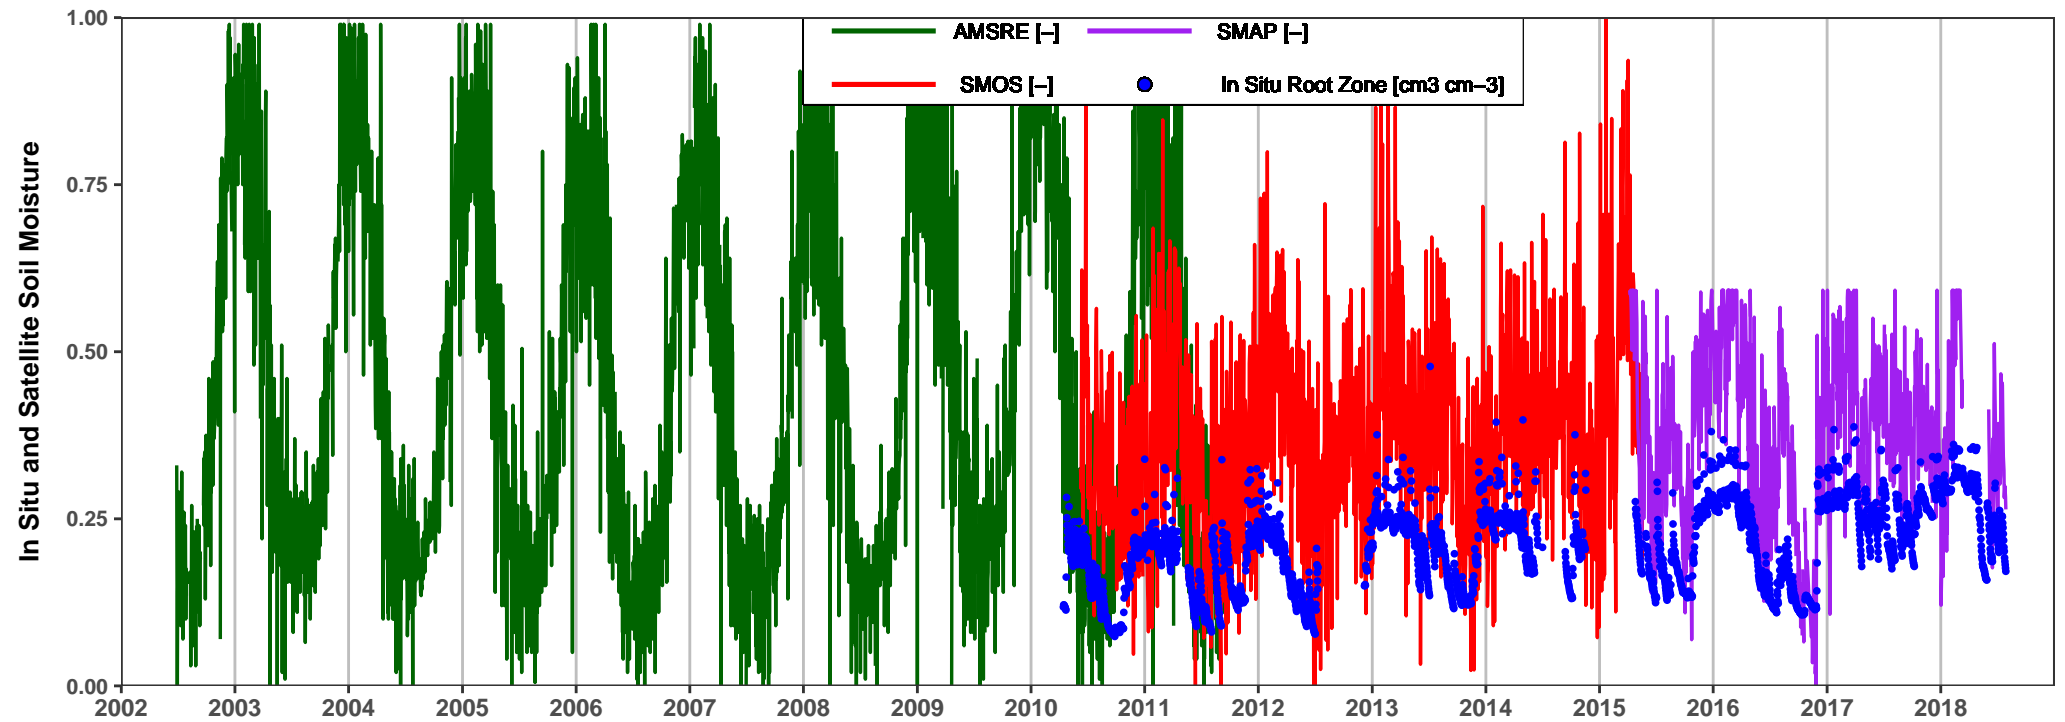



# Site: SunleafNursery

AMSRE Average

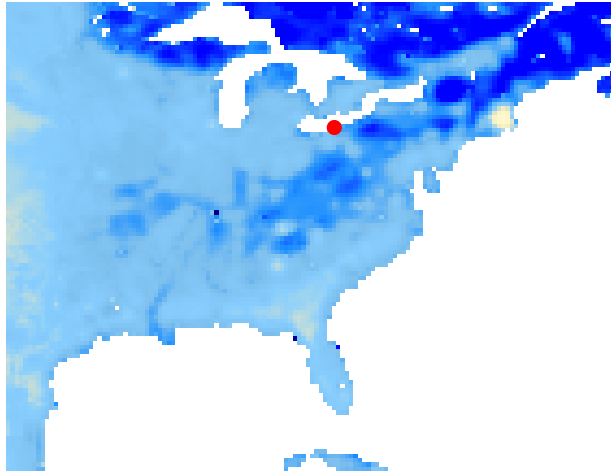

SMOS Average

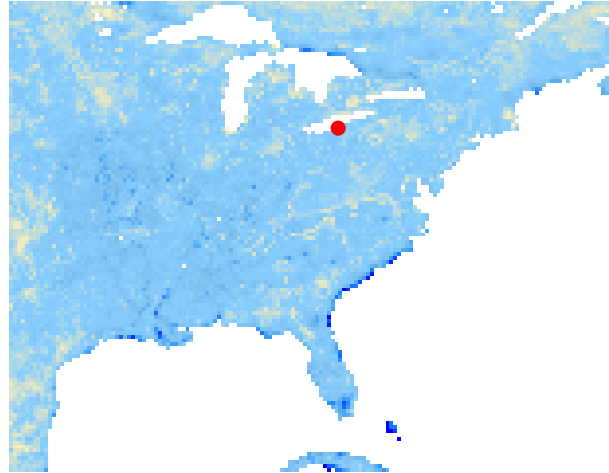

SMAP Average

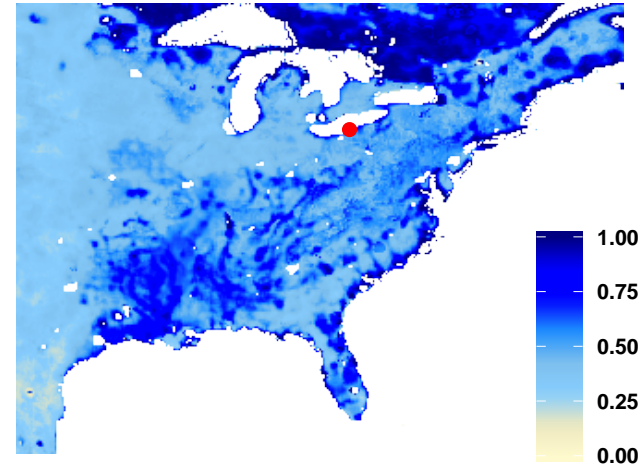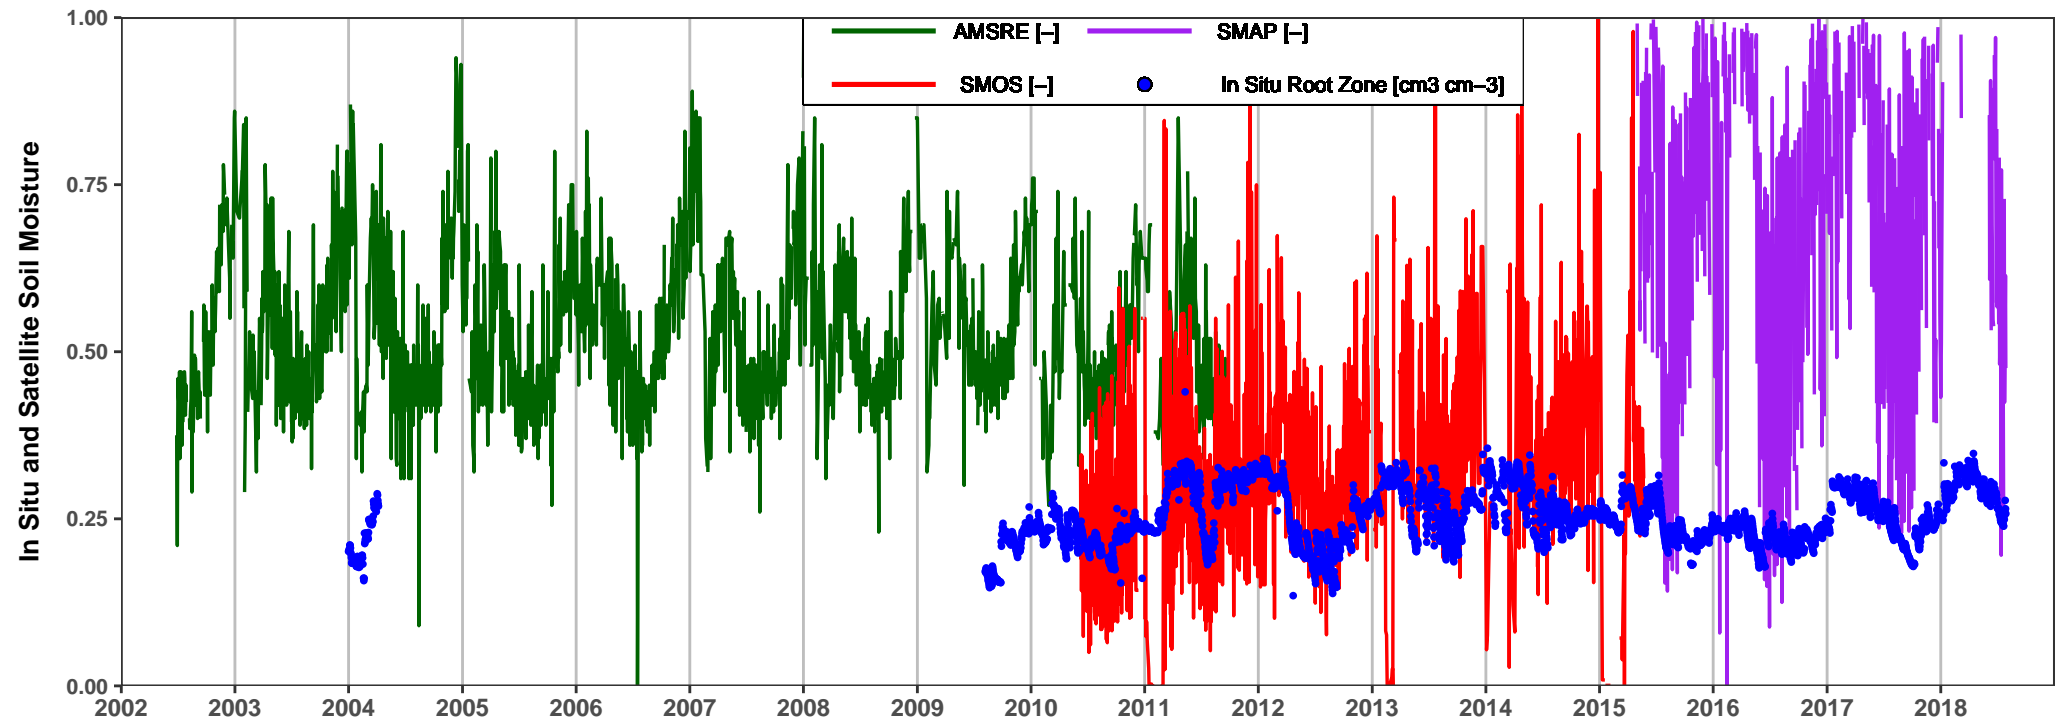

# Site: Tidewater1

## AMSRE Average

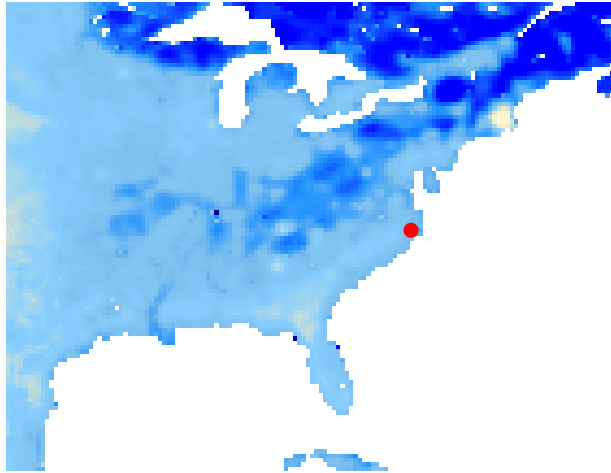

## SMOS Average

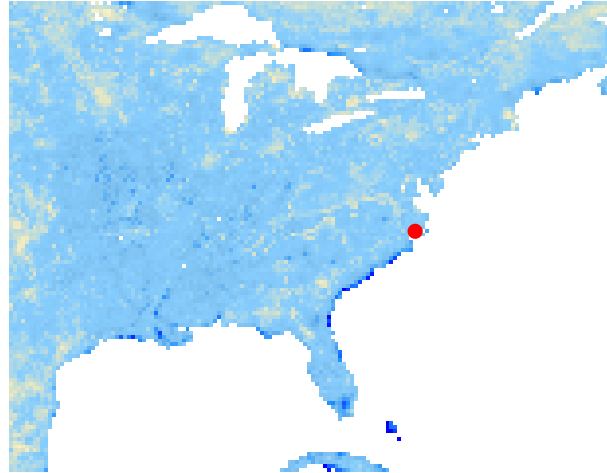

## SMAP Average

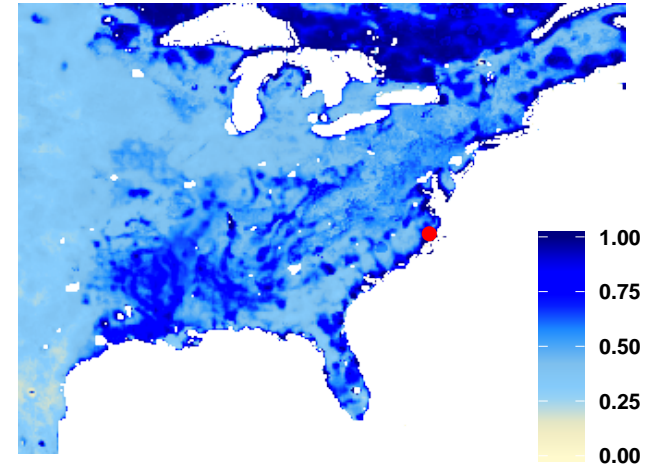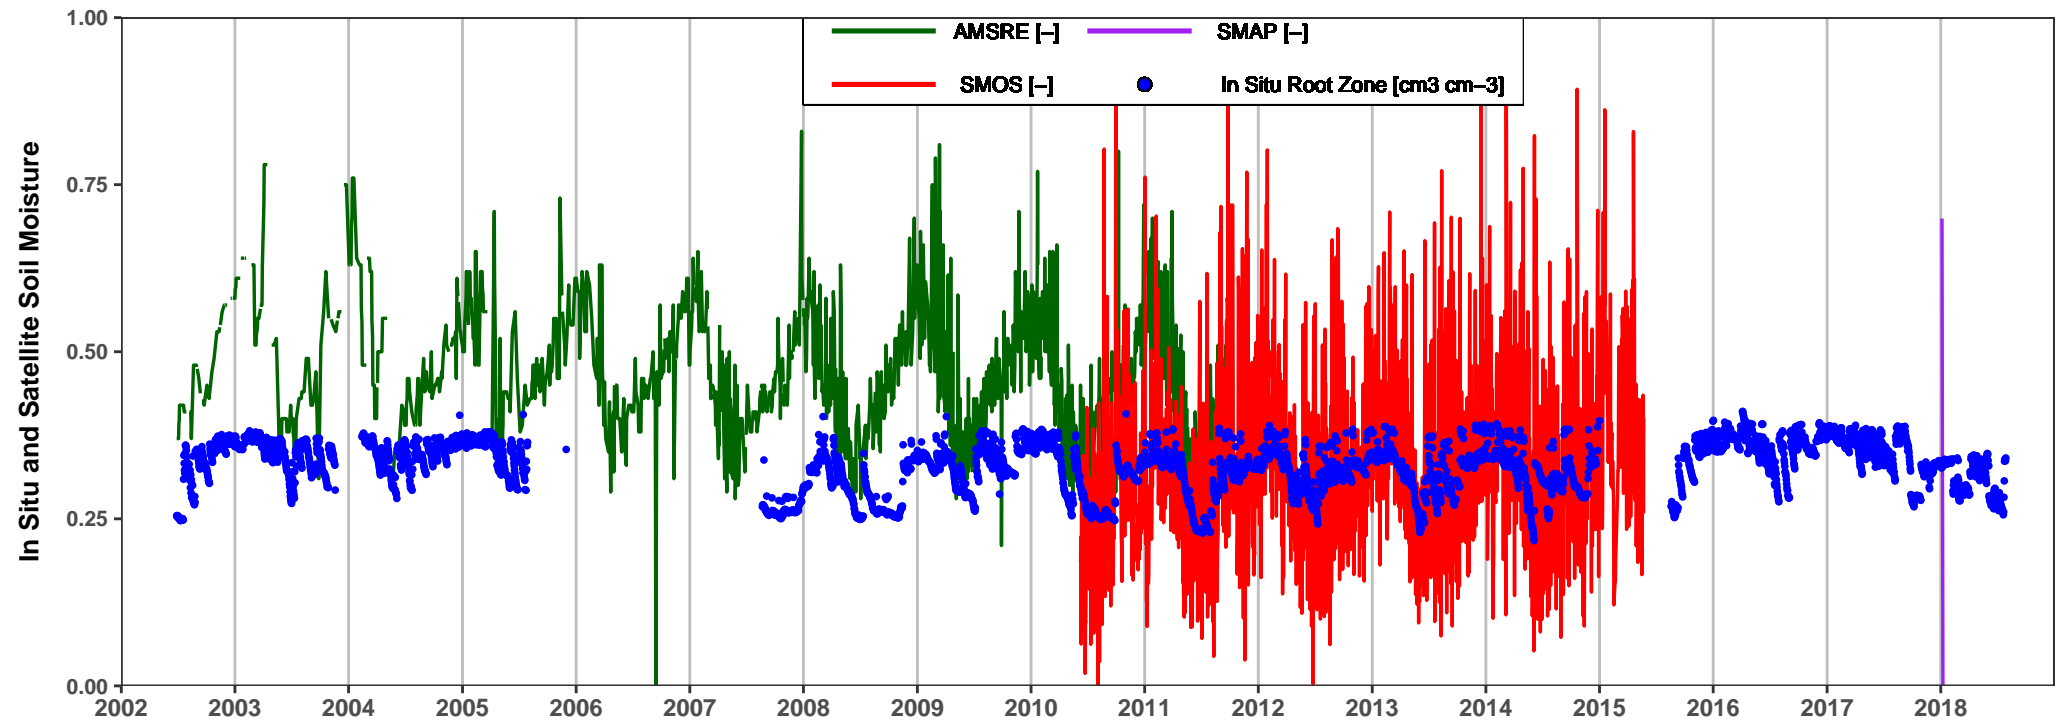

# Site: TidewaterArec

## AMSRE Average

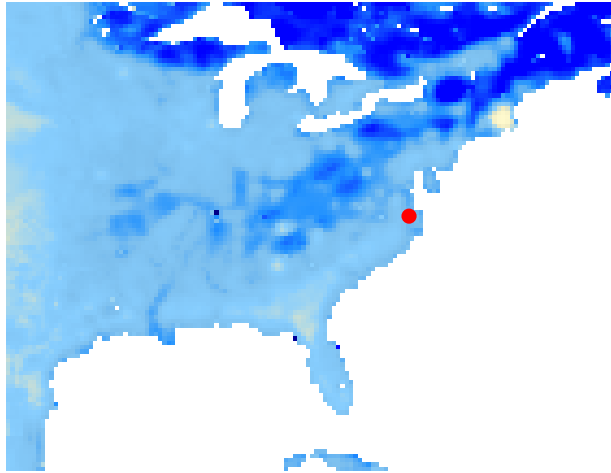

## SMOS Average

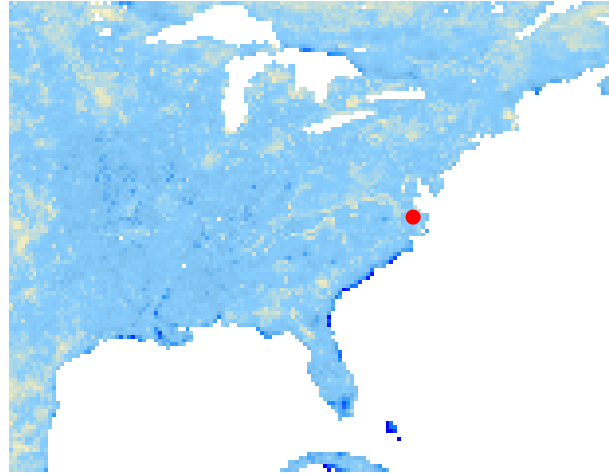

## SMAP Average

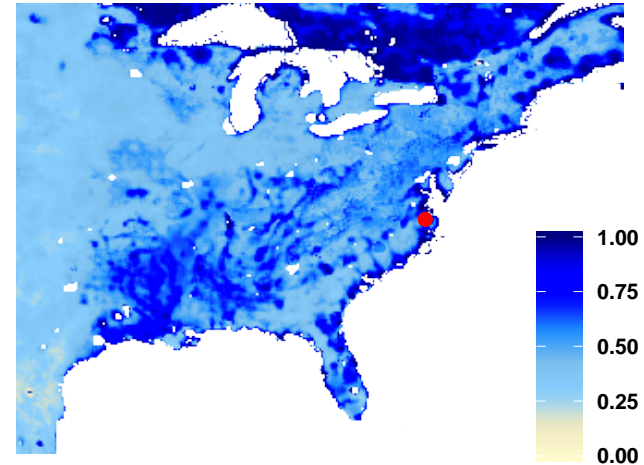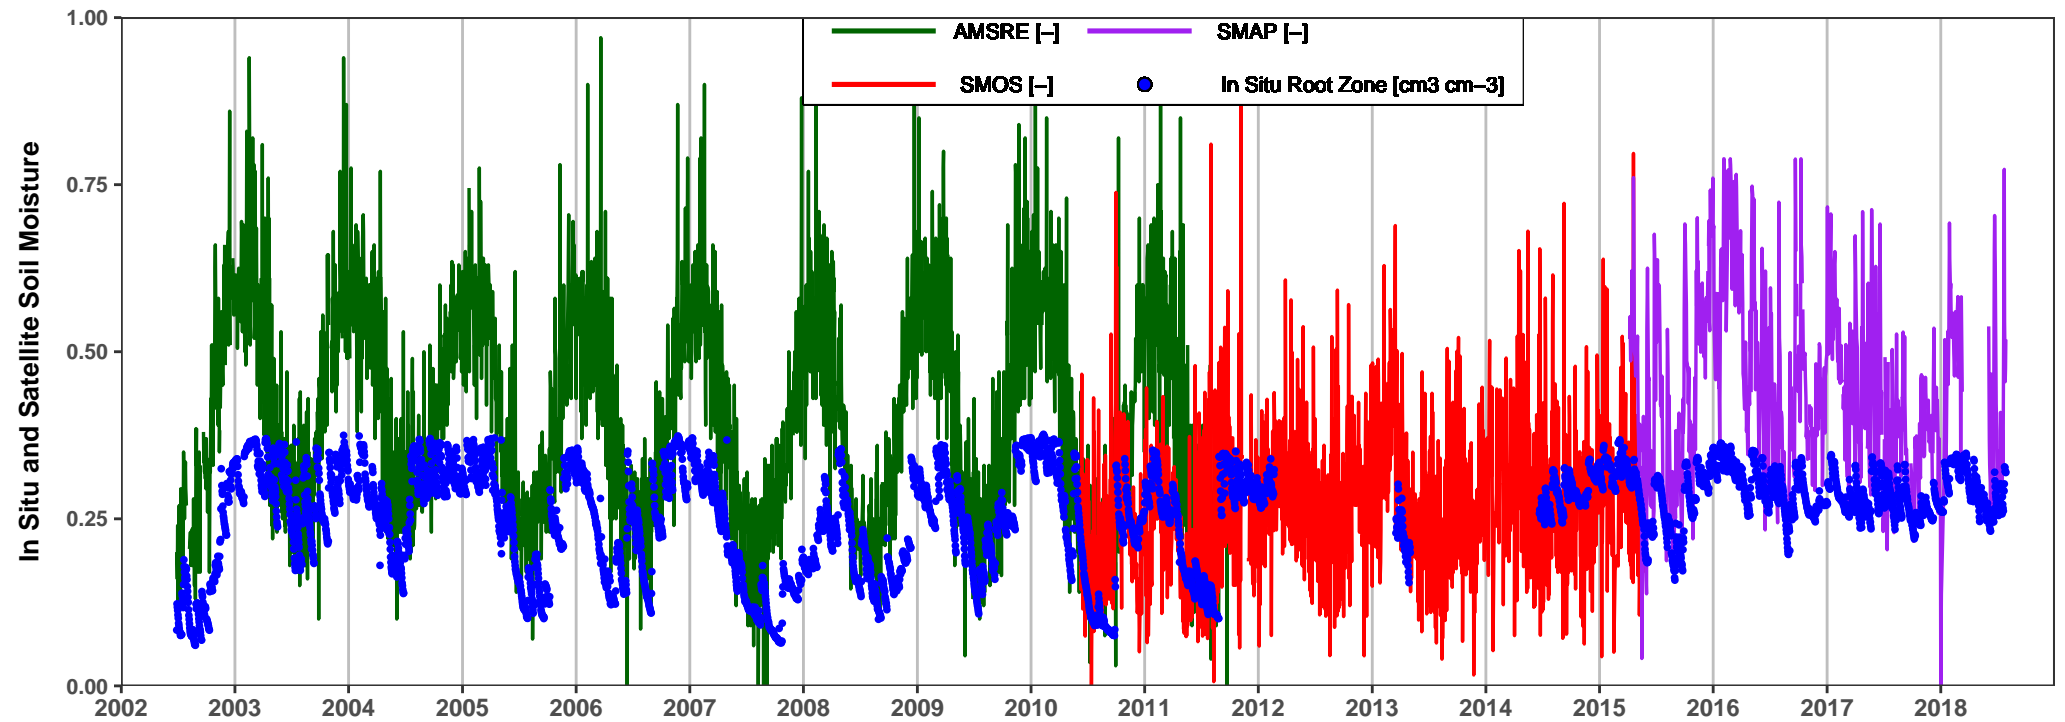

# Site: TncFortBayou

## AMSRE Average

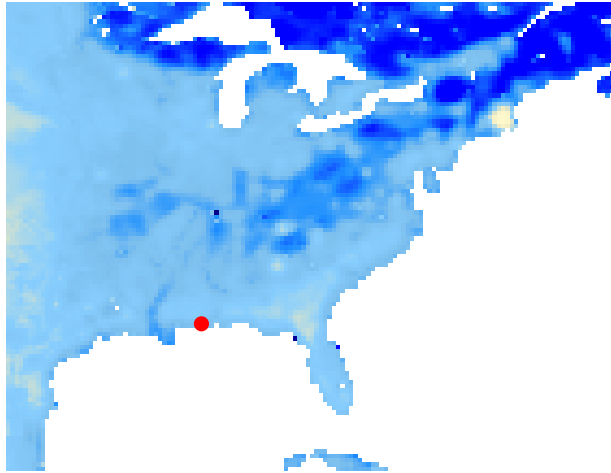

## SMOS Average

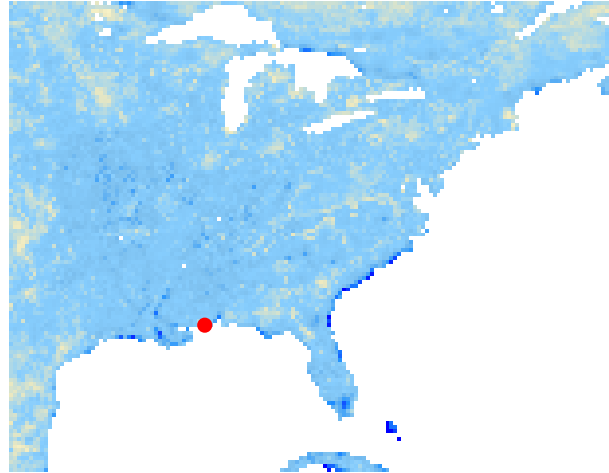

## SMAP Average

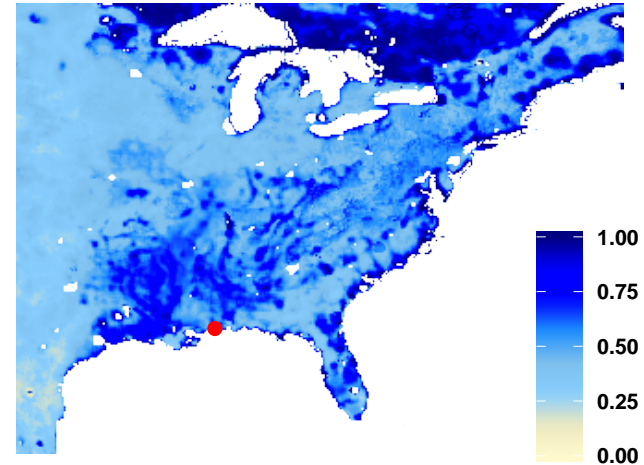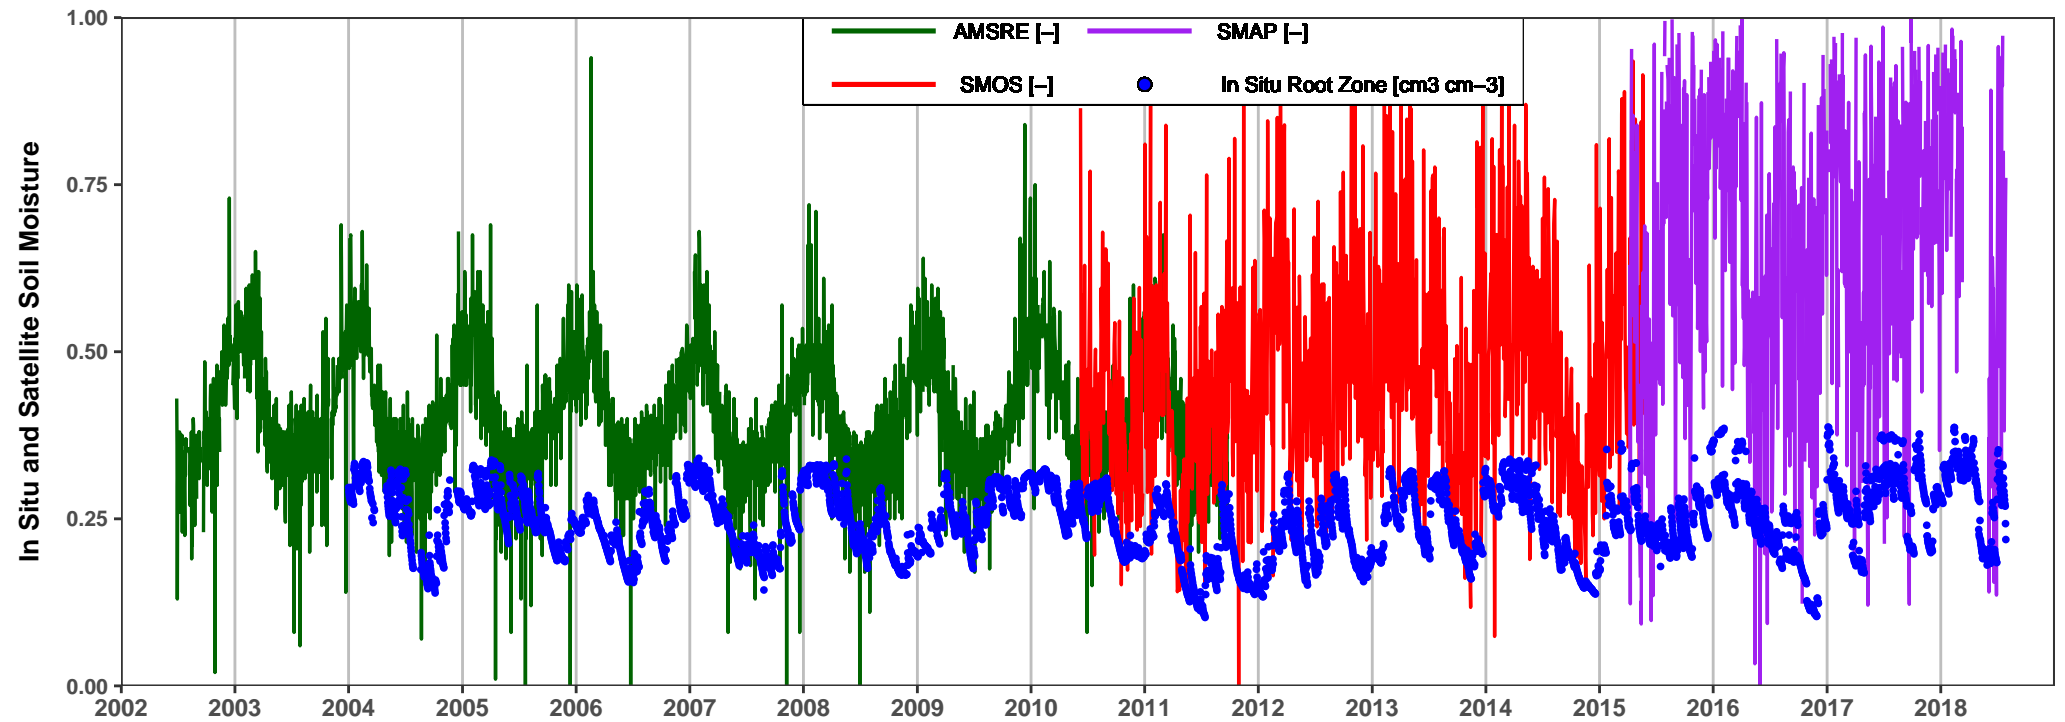

# Site: Tunica

## AMSRE Average

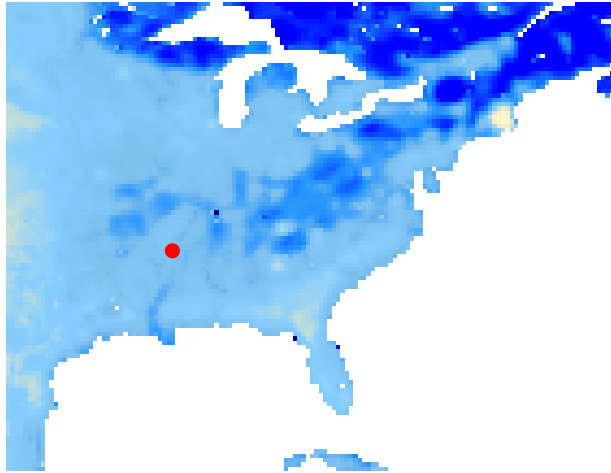

## SMOS Average

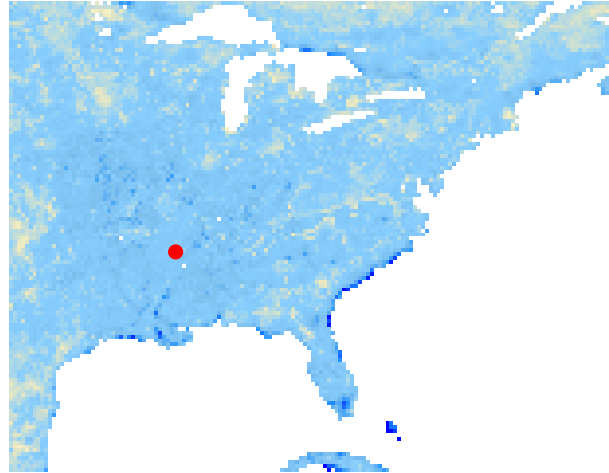

## SMAP Average

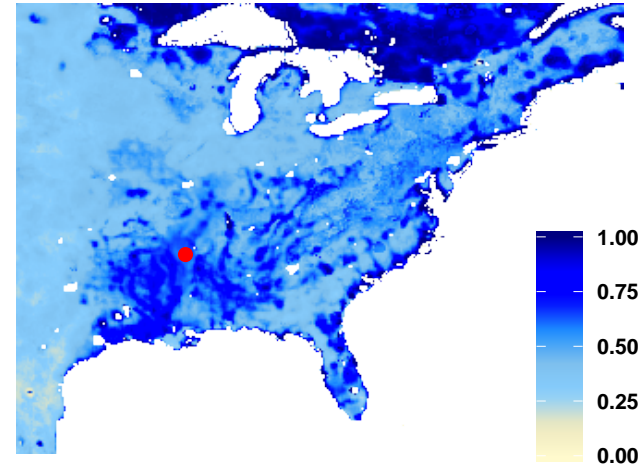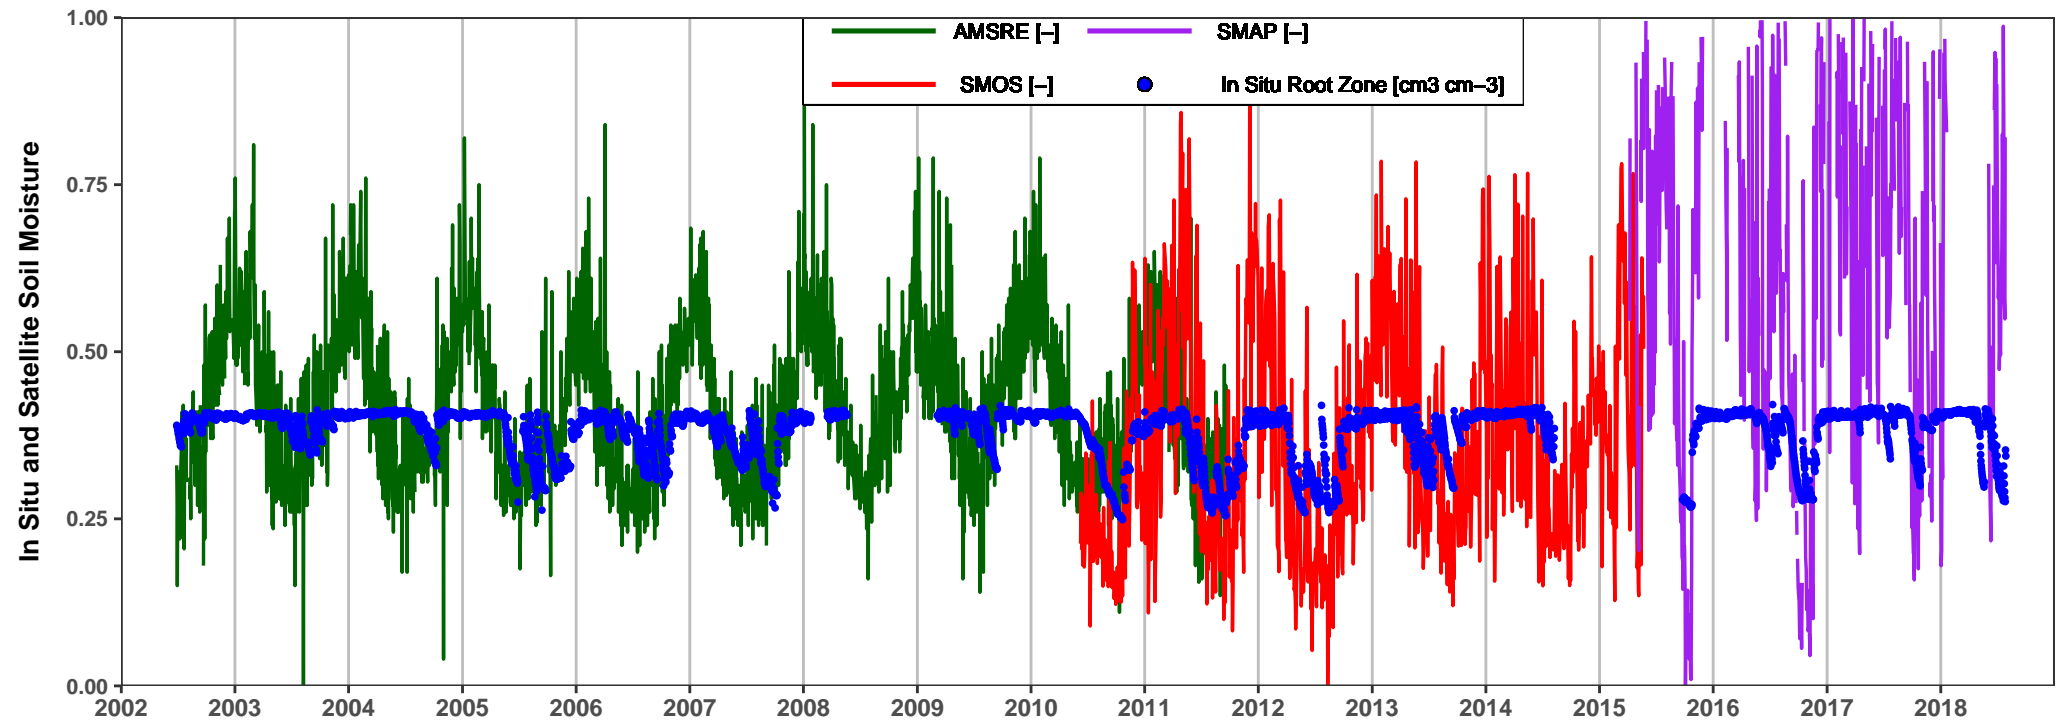

# Site: Tuskegee

## AMSRE Average

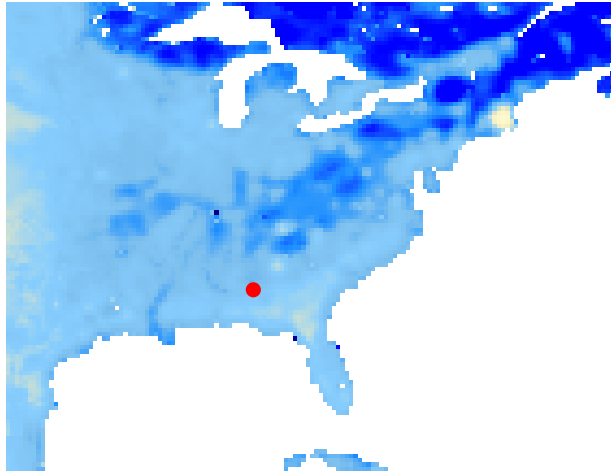

## SMOS Average

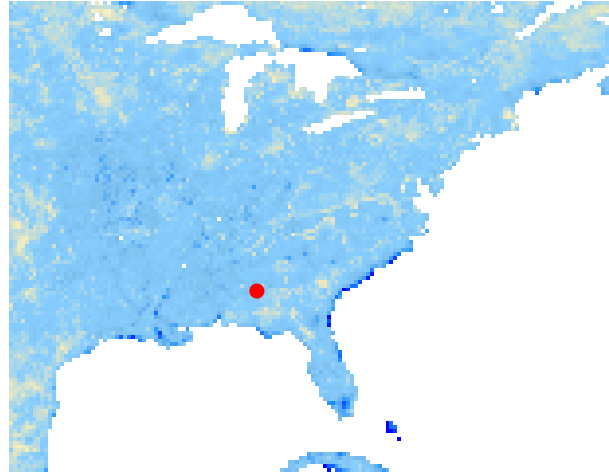

## SMAP Average

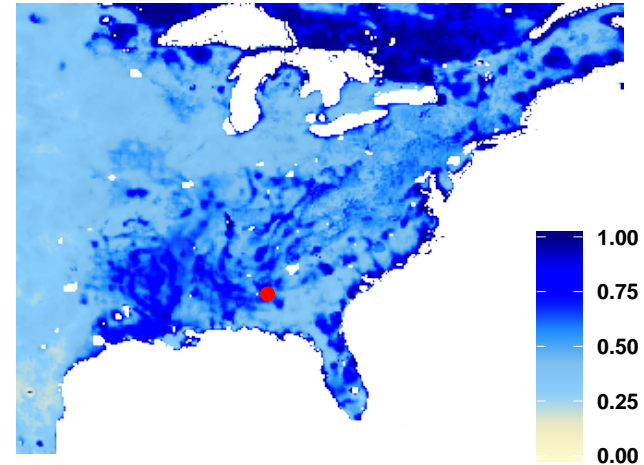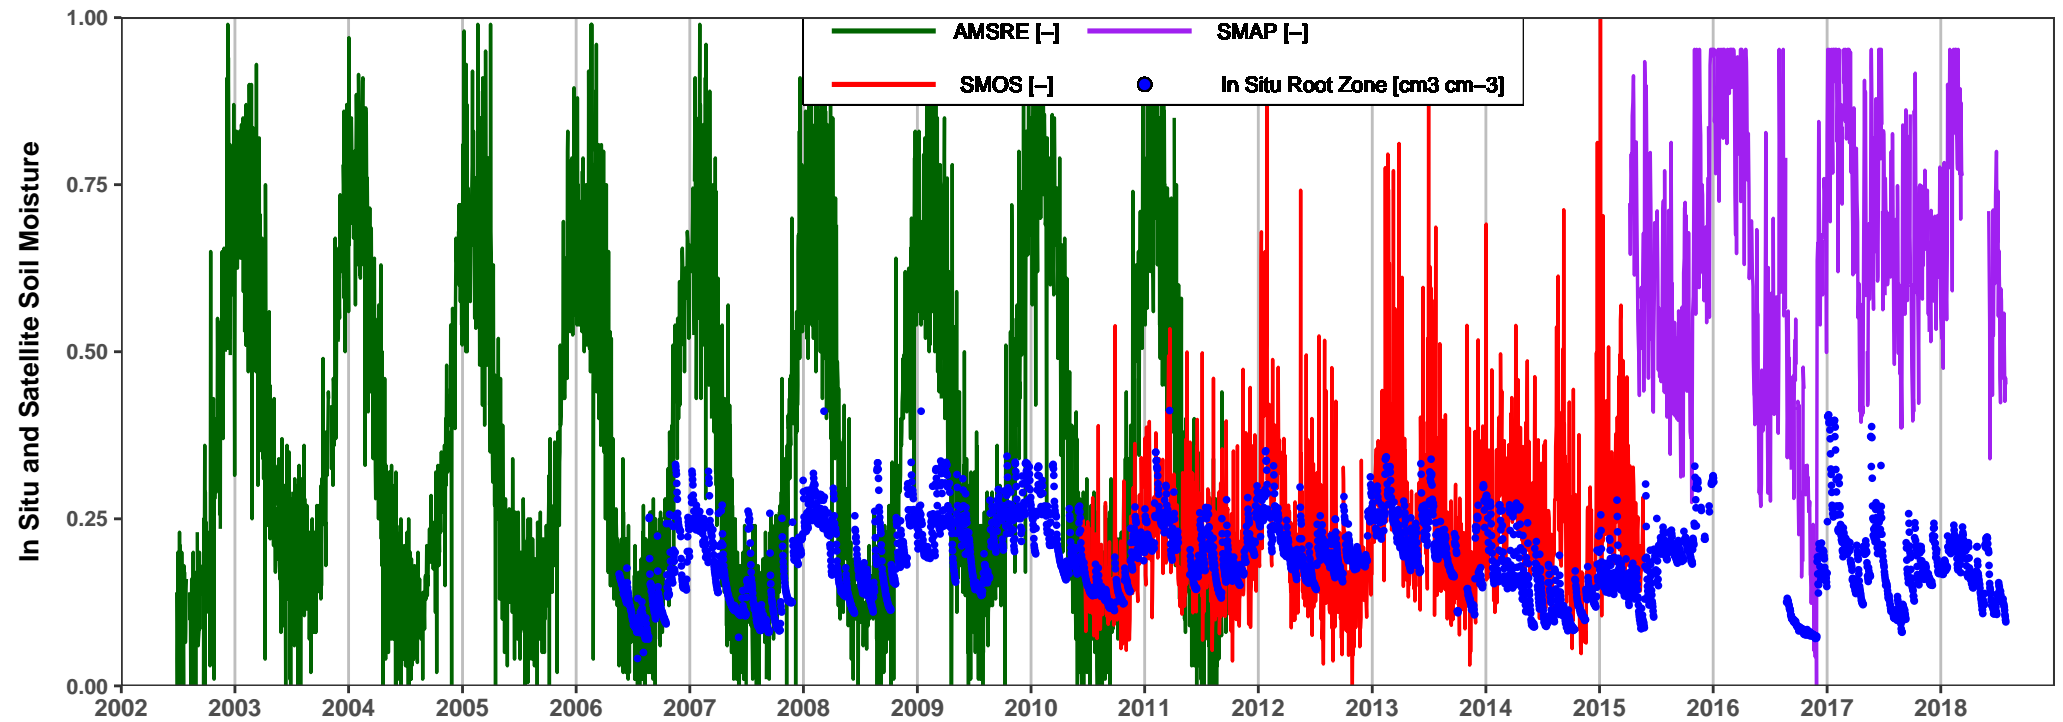

# Site: UapbCampusPB

## AMSRE Average

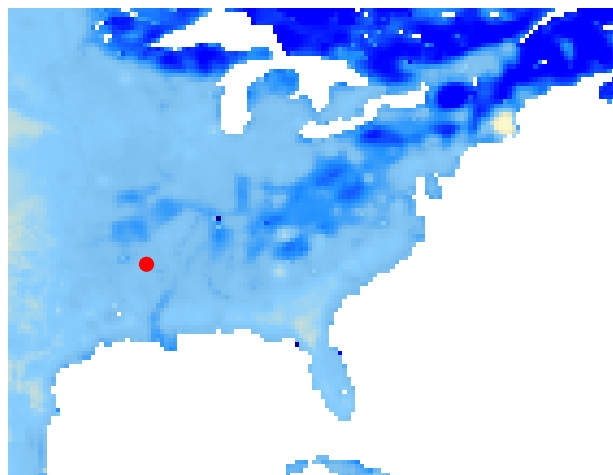

## SMOS Average

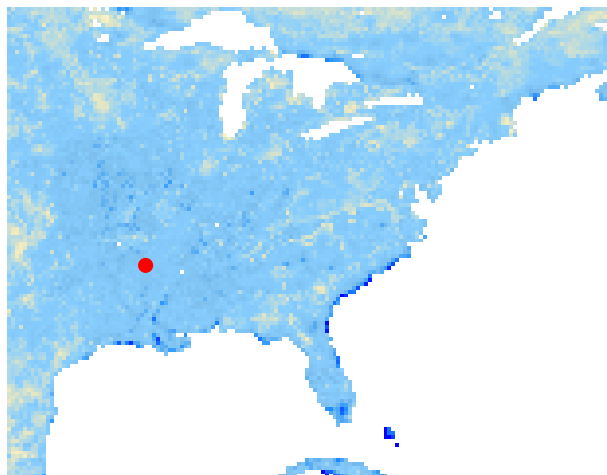

## SMAP Average

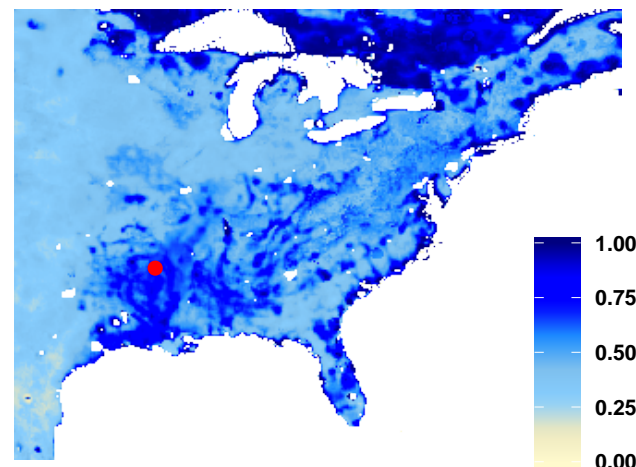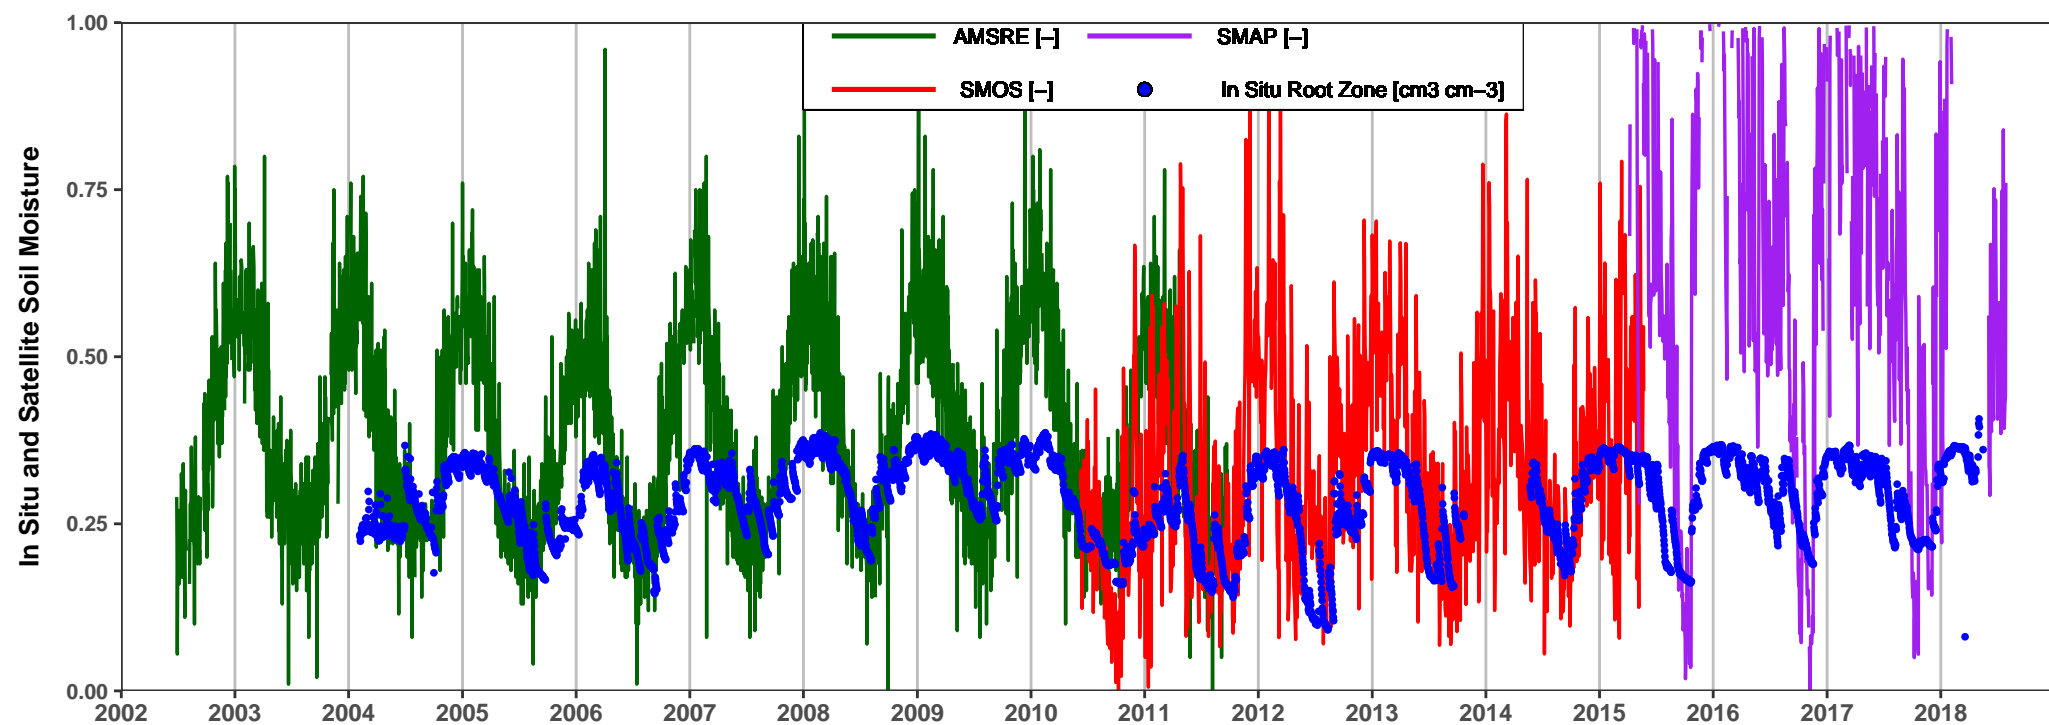



# Site: UapbDewitt

## AMSRE Average

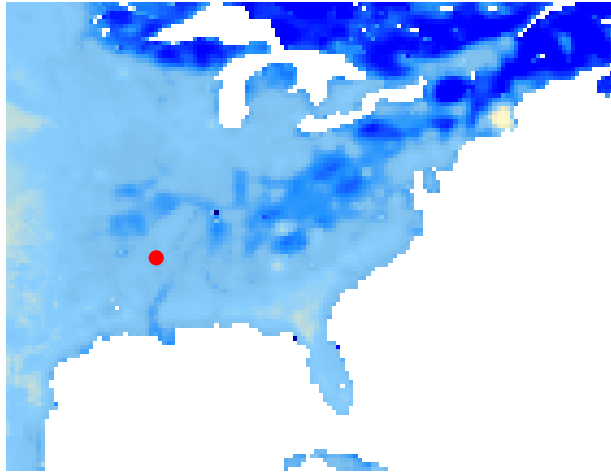

## SMOS Average

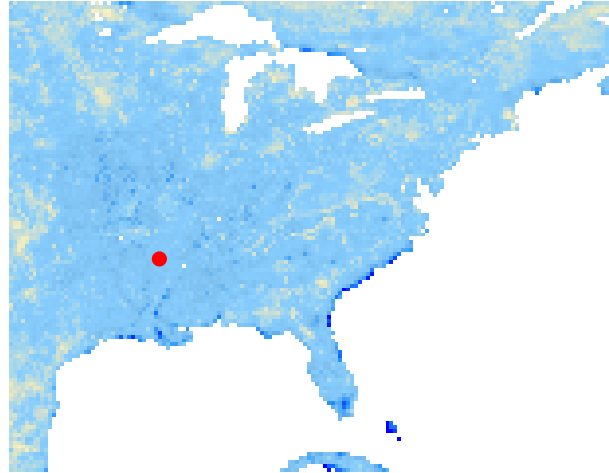

## SMAP Average

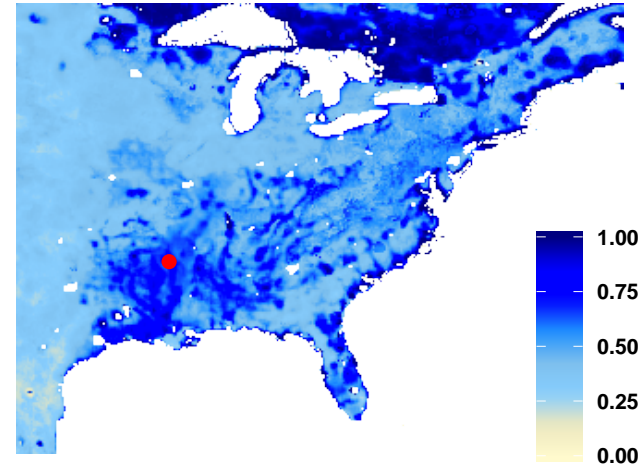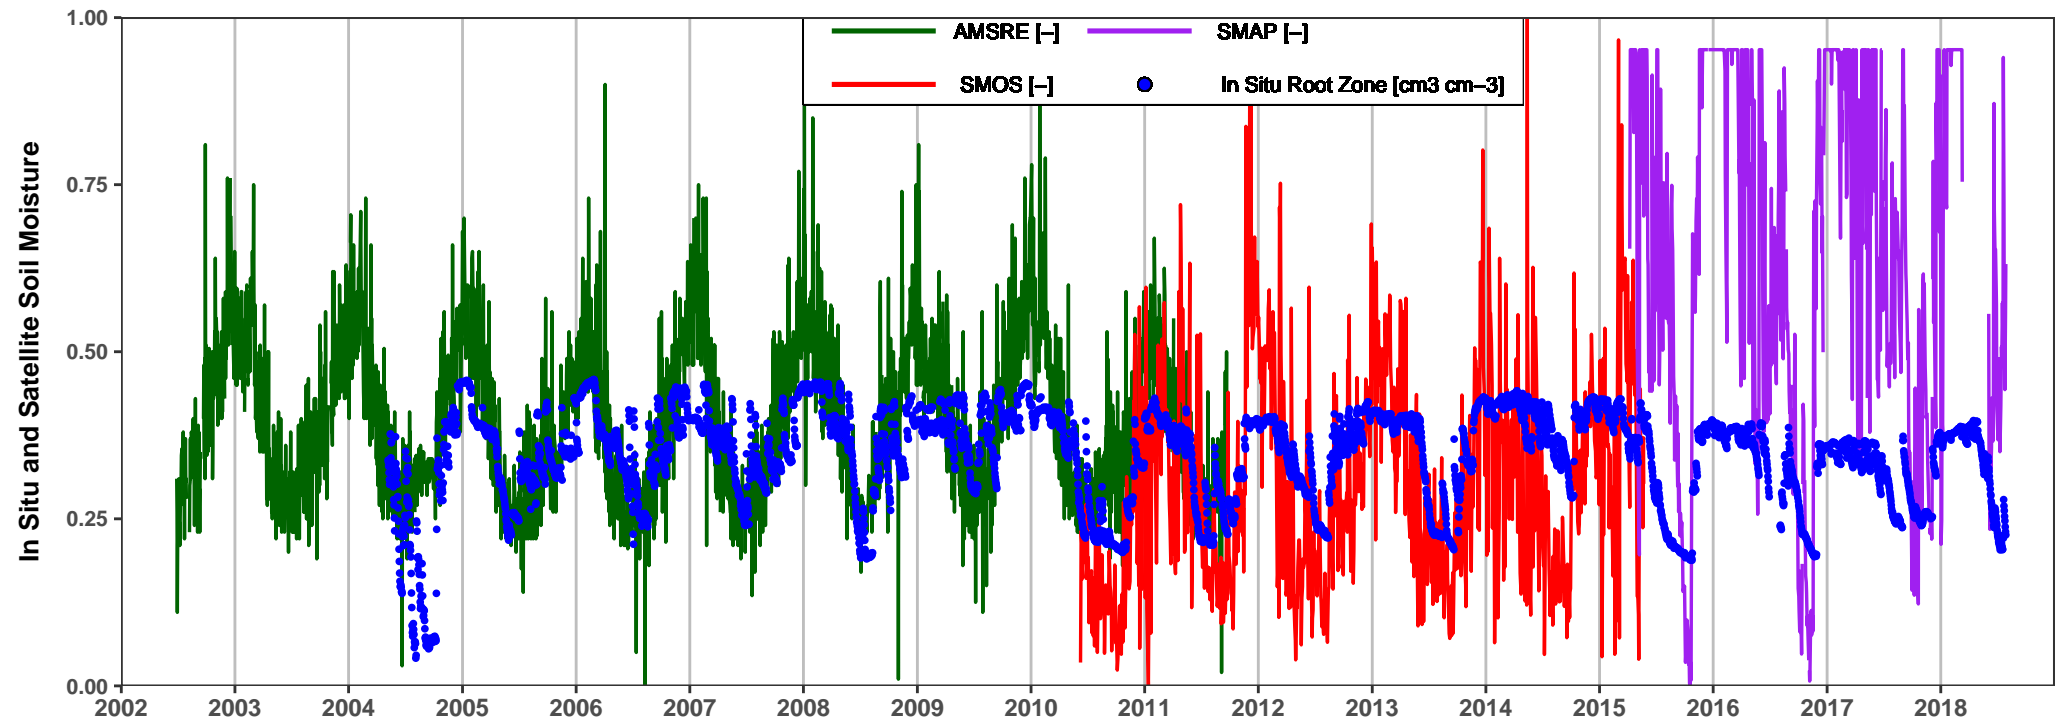

# Site: UapbEarle

## AMSRE Average

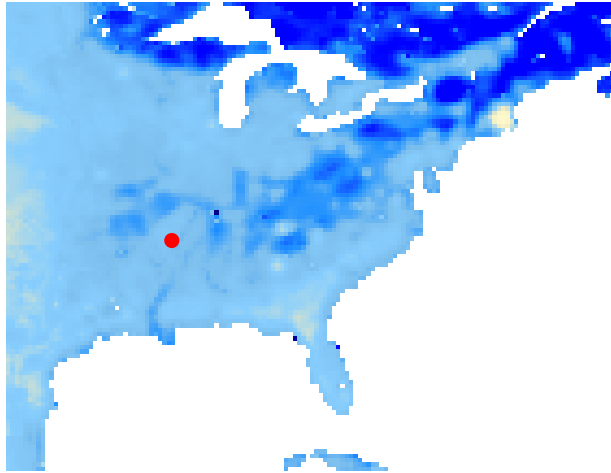

## SMOS Average

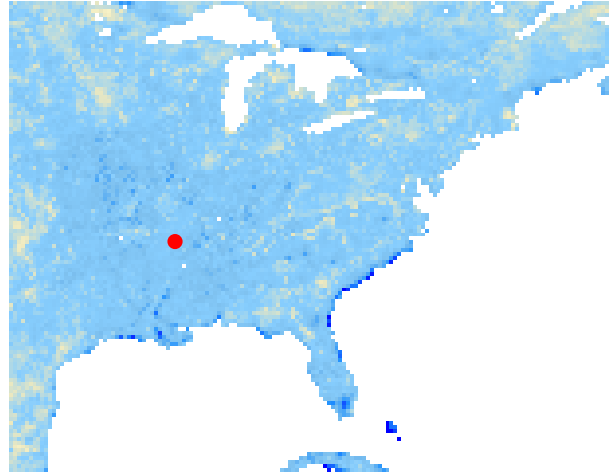

## SMAP Average

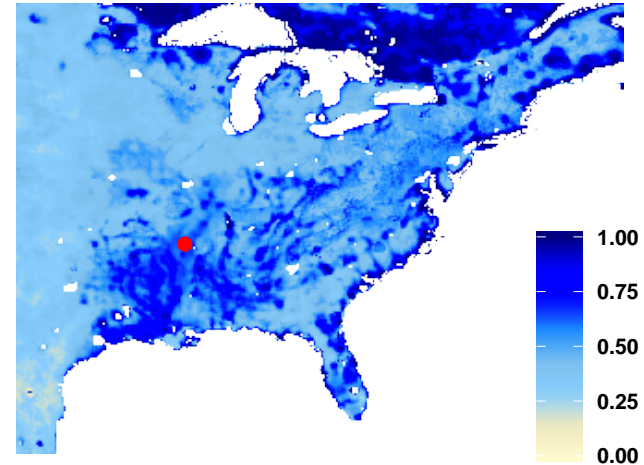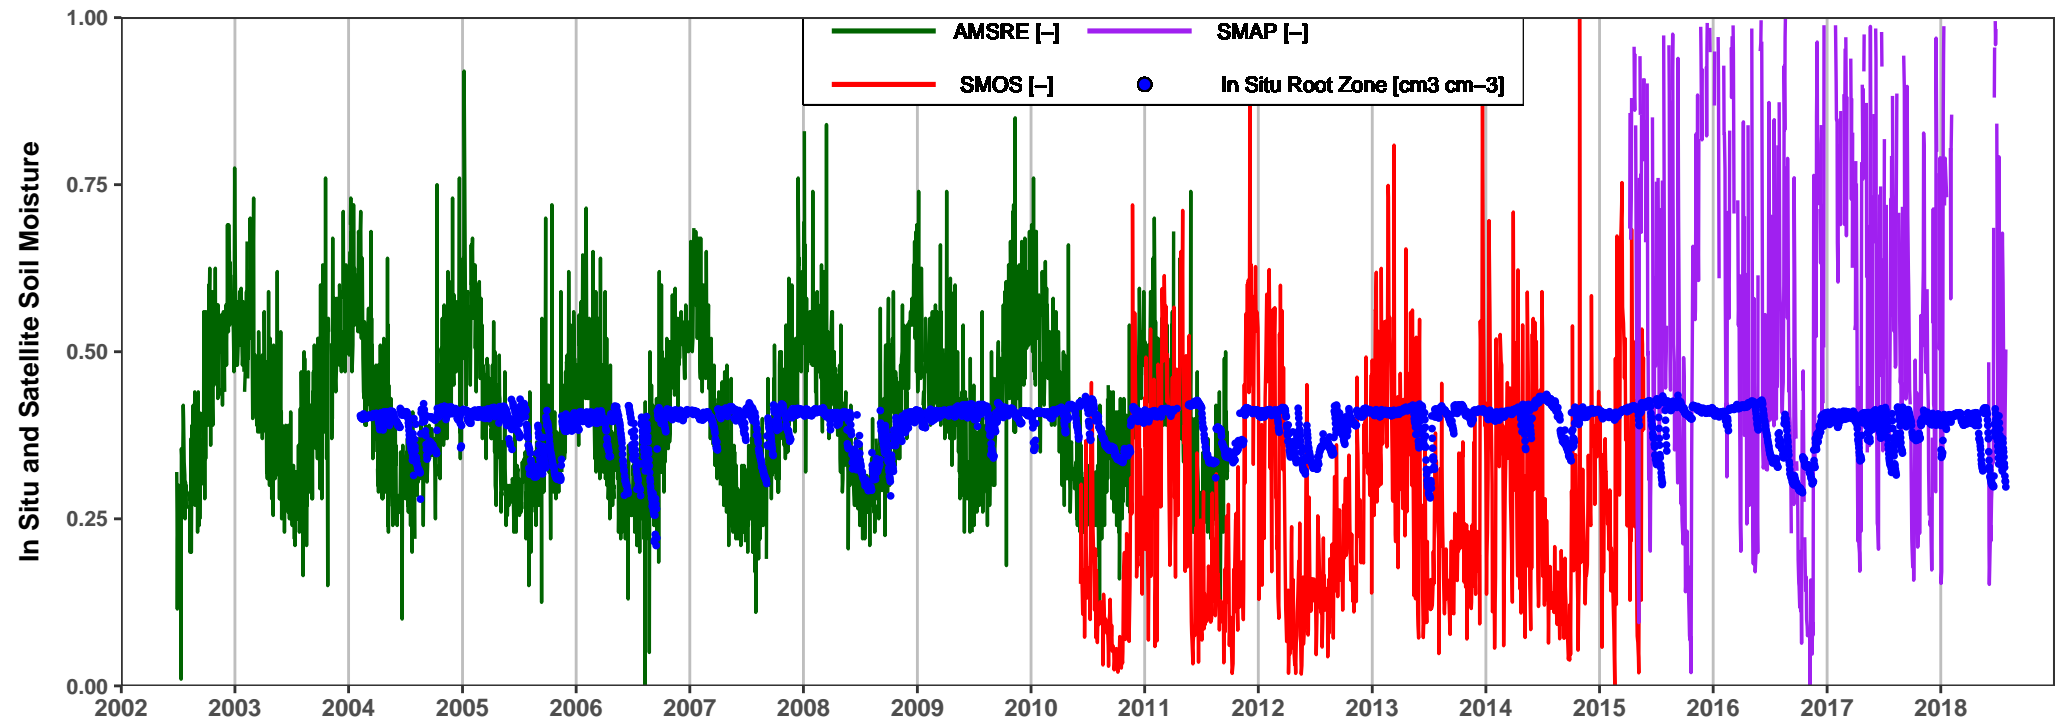

# Site: UapbMarianna

AMSRE Average

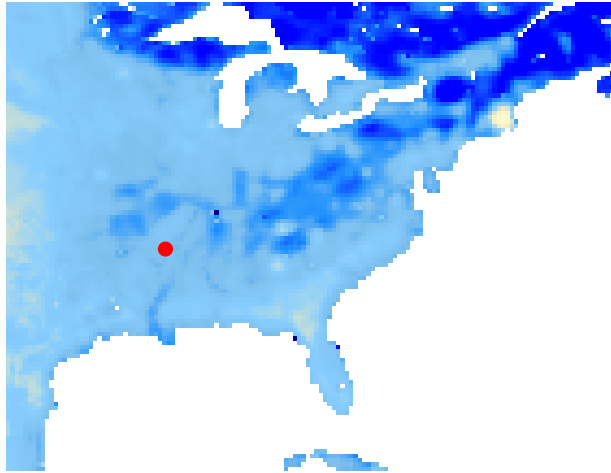

SMOS Average

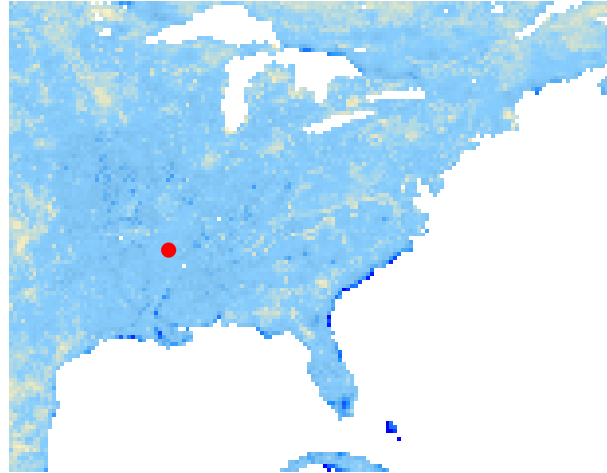

SMAP Average

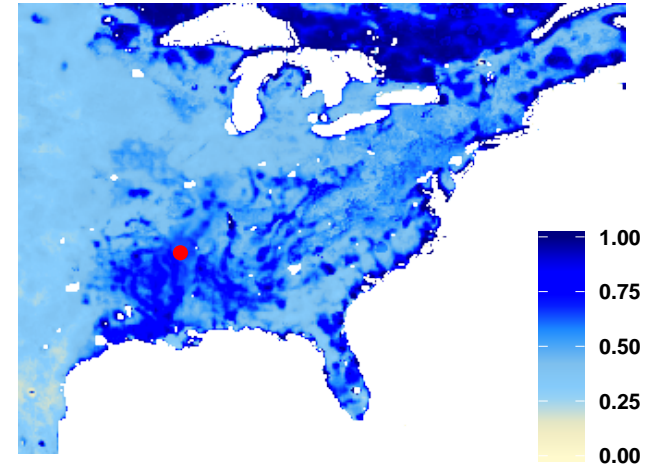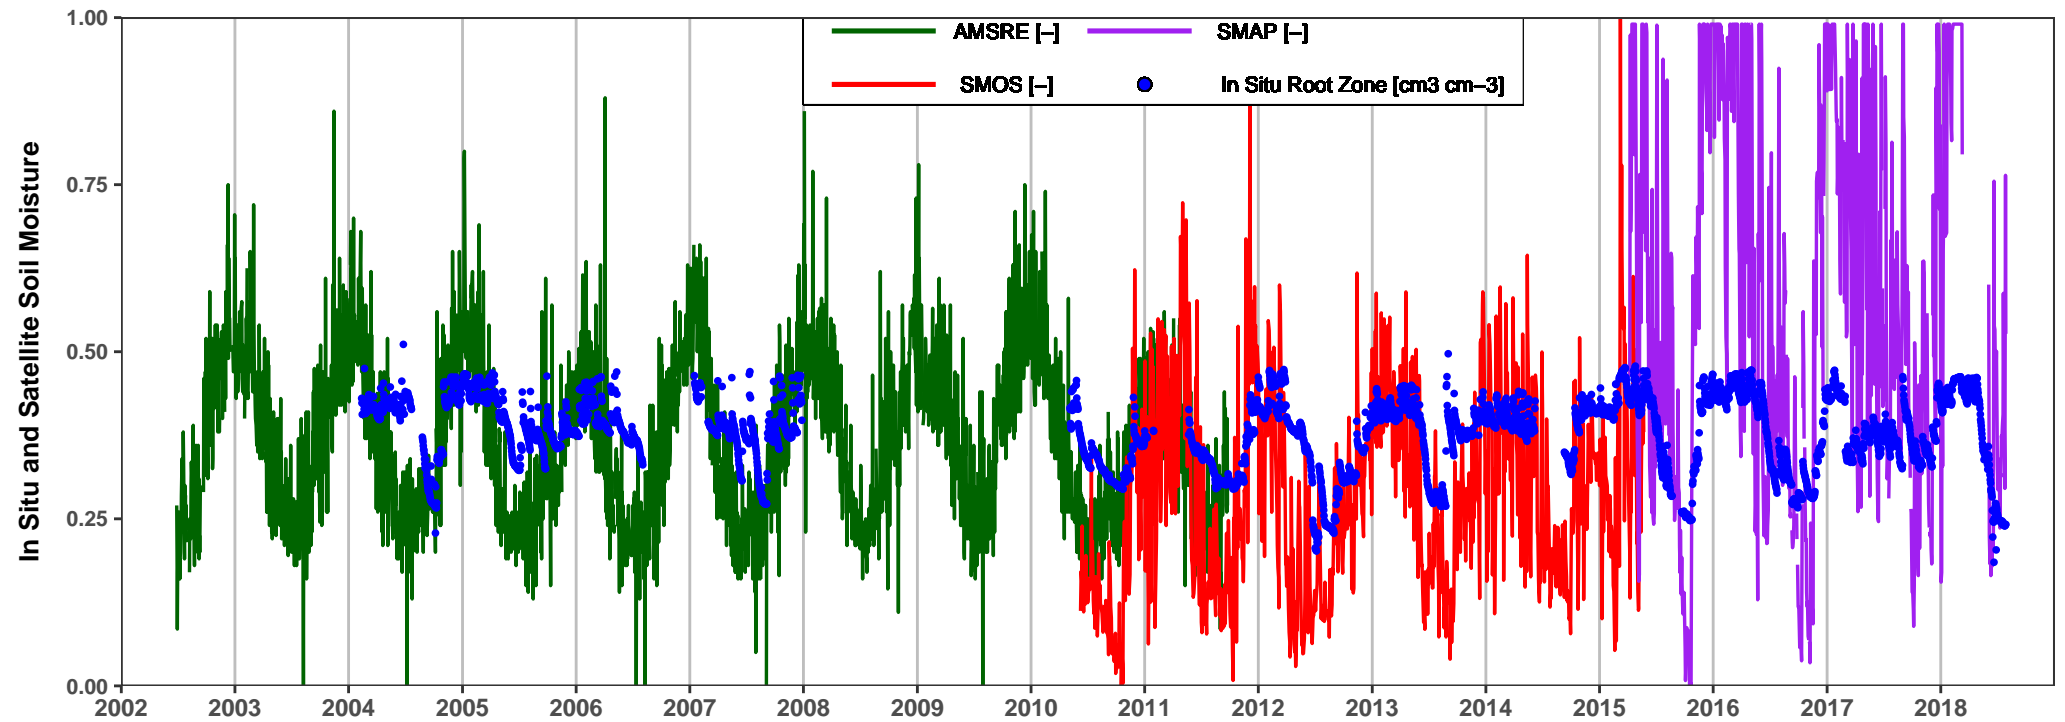

# Site: UapbPointRemove

AMSRE Average

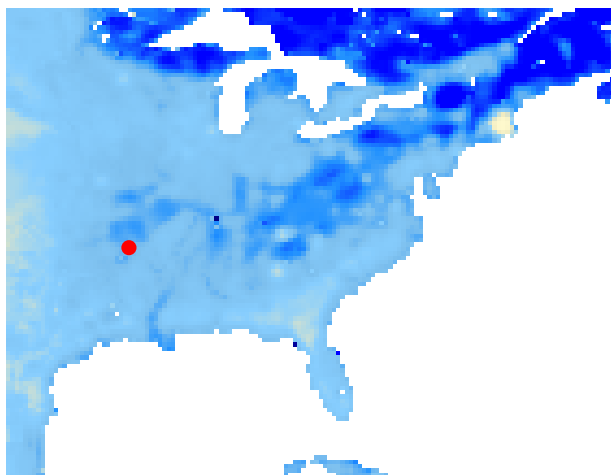

SMOS Average

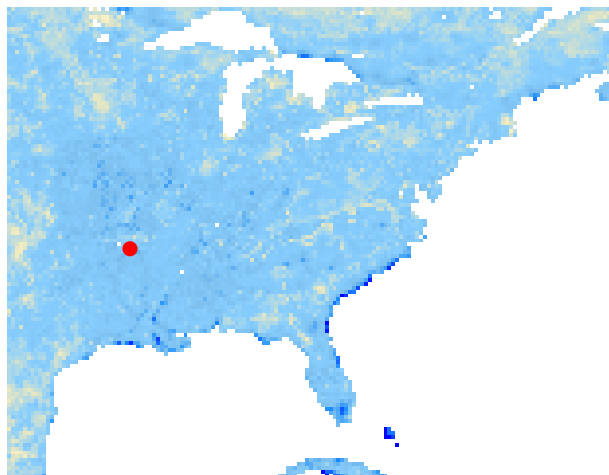

SMAP Average

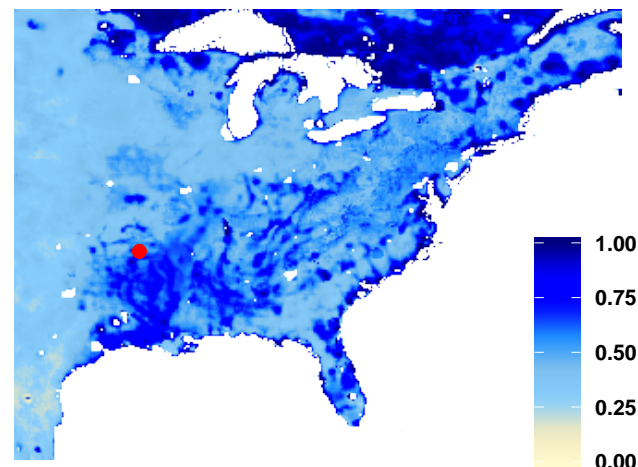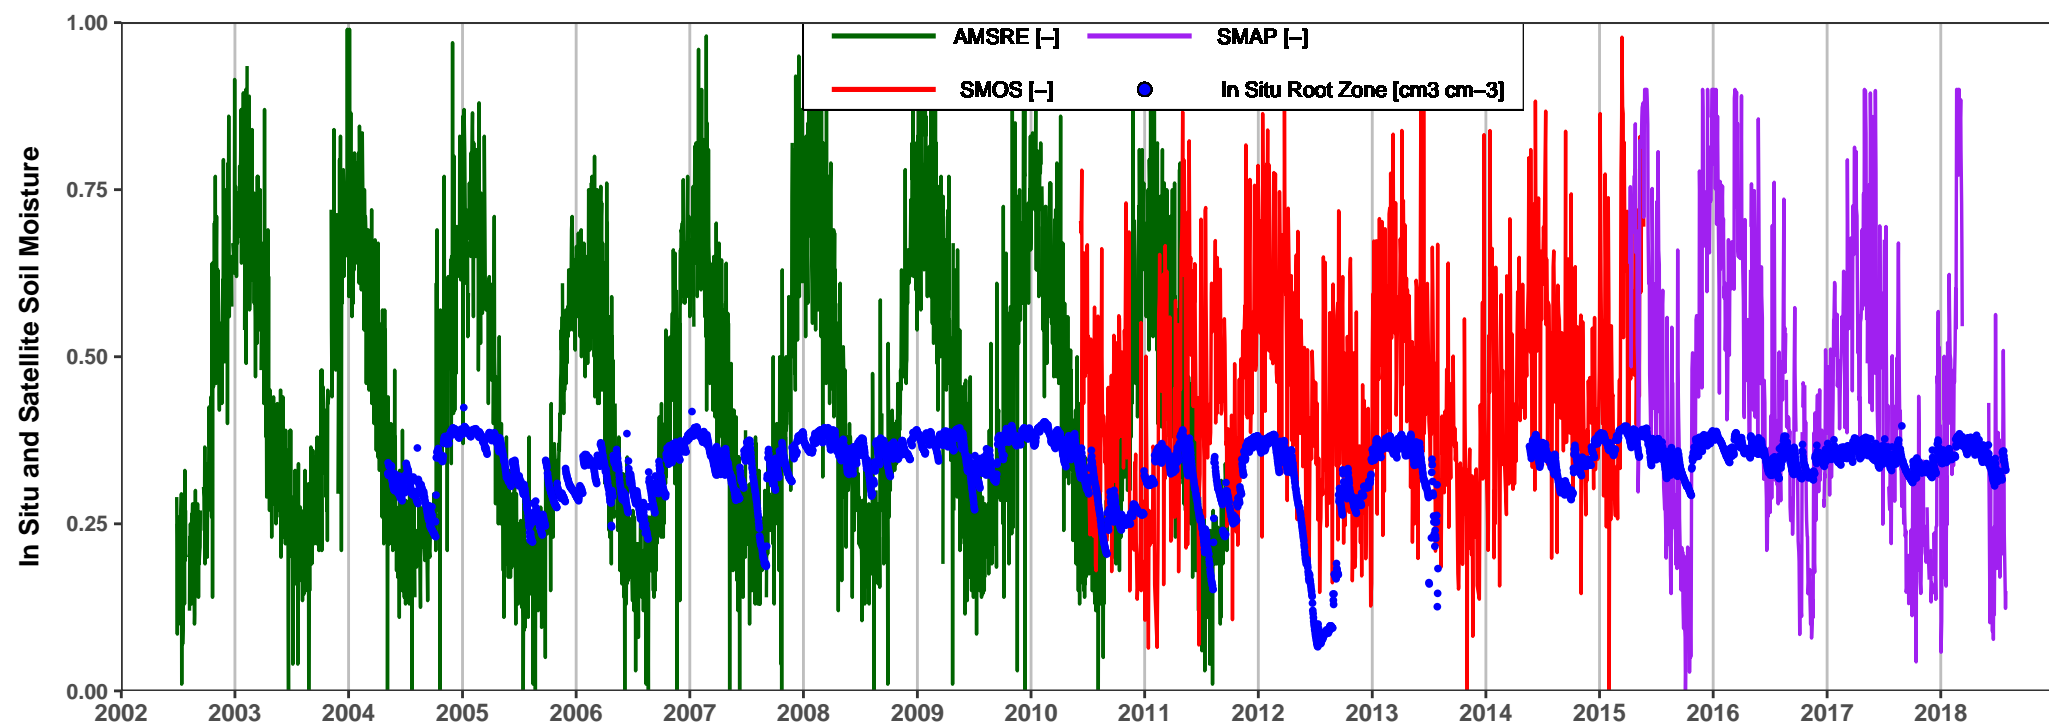

# Site: UWPlatteville

## AMSRE Average

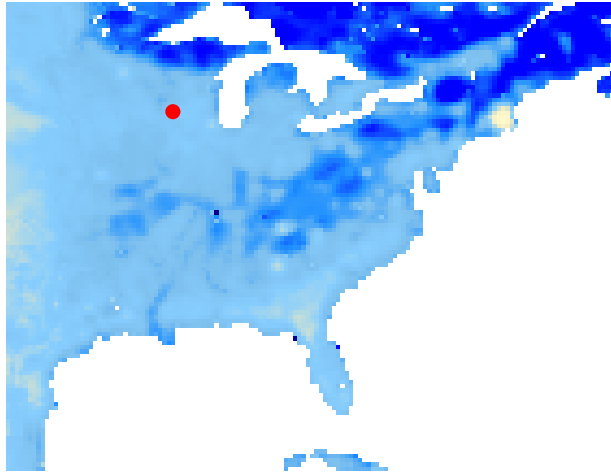

## SMOS Average

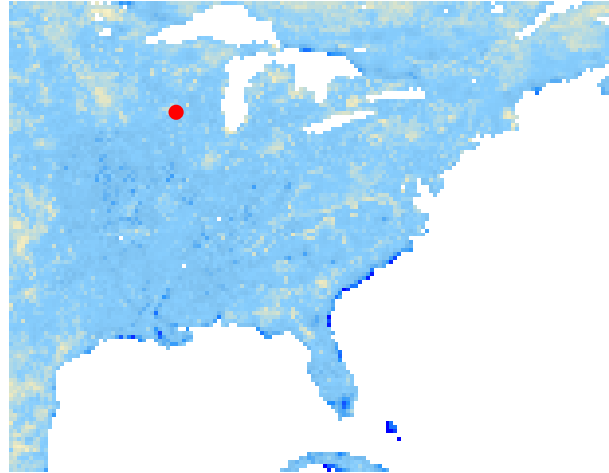

## SMAP Average

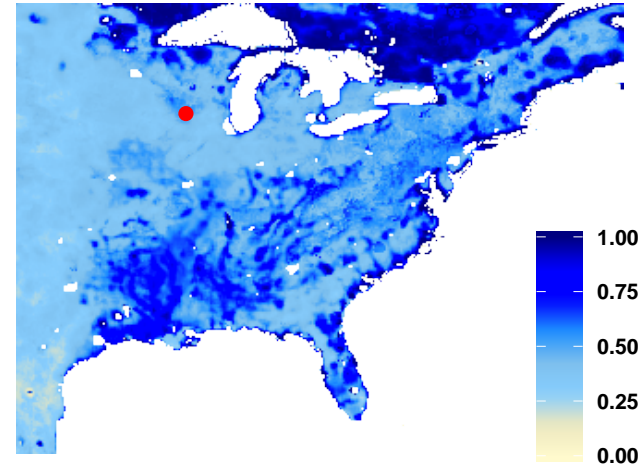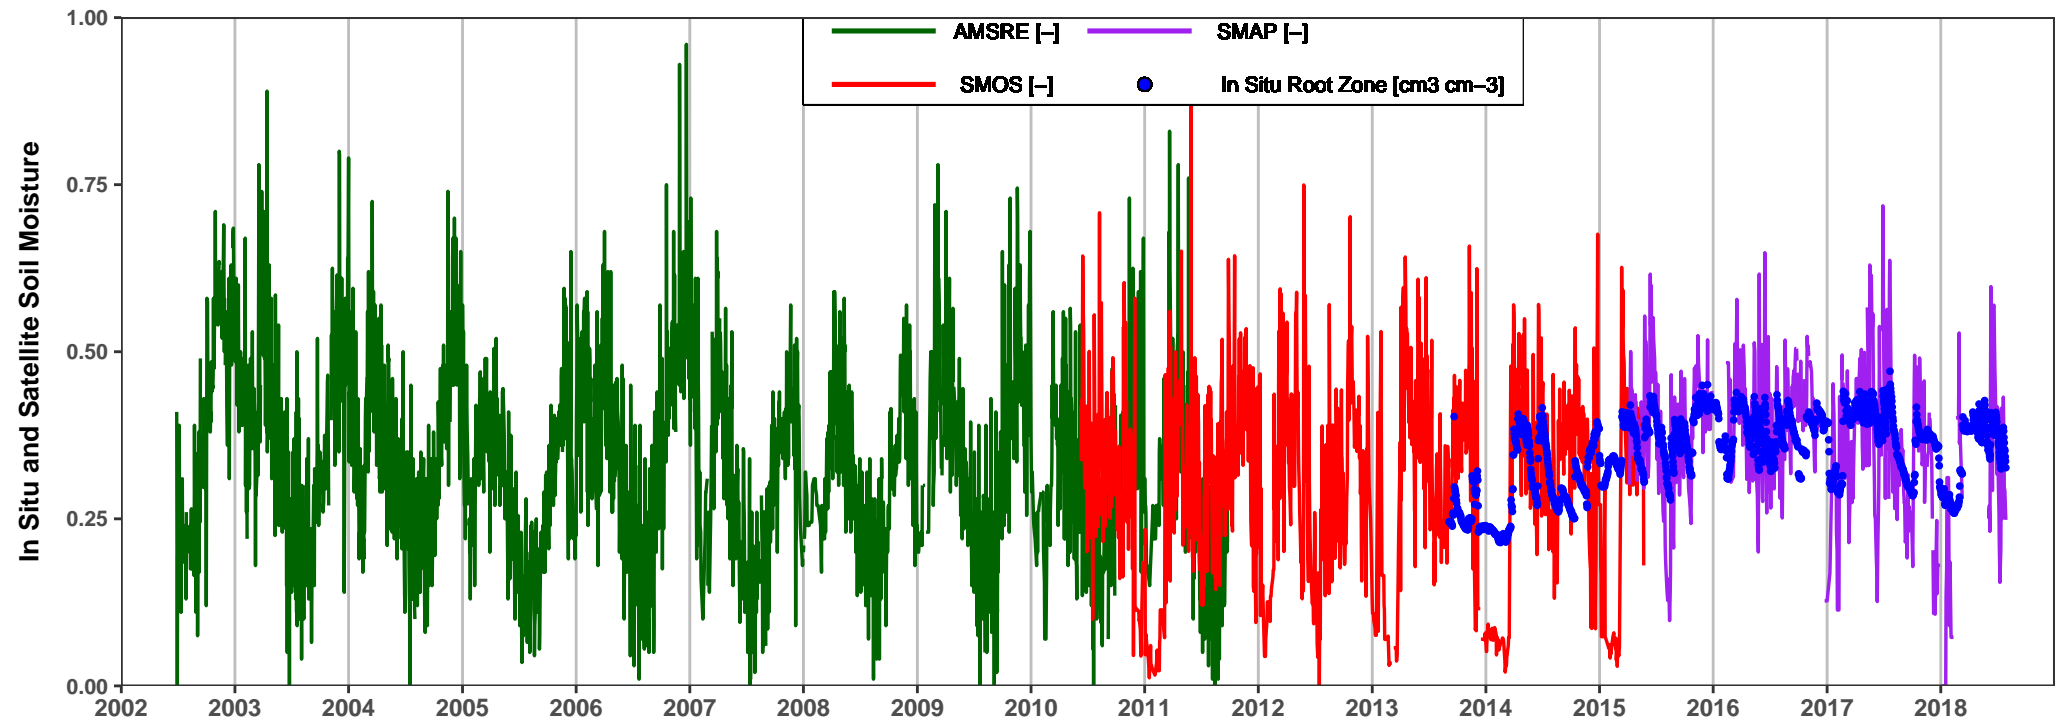

# Site: Vance

## AMSRE Average

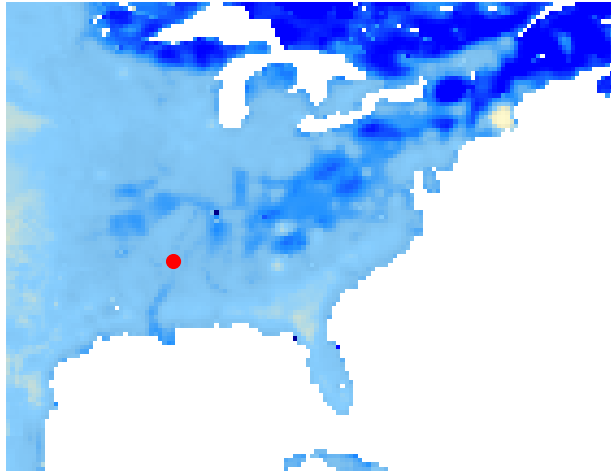

## SMOS Average

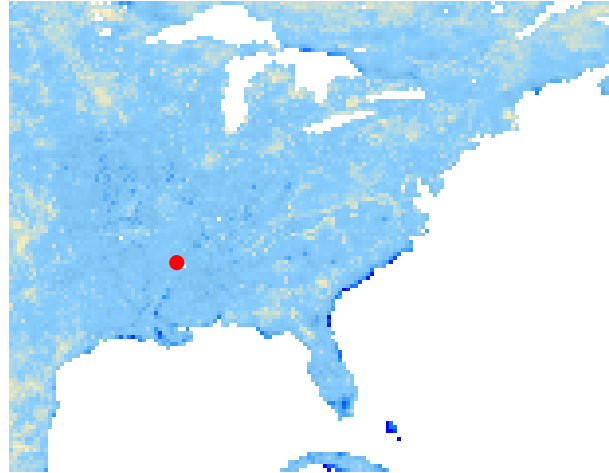

## SMAP Average

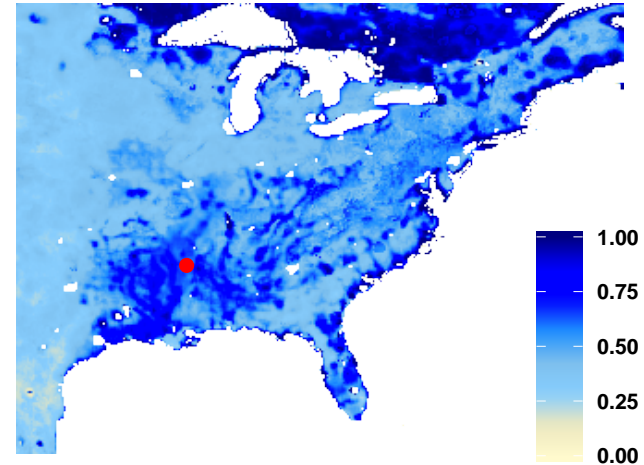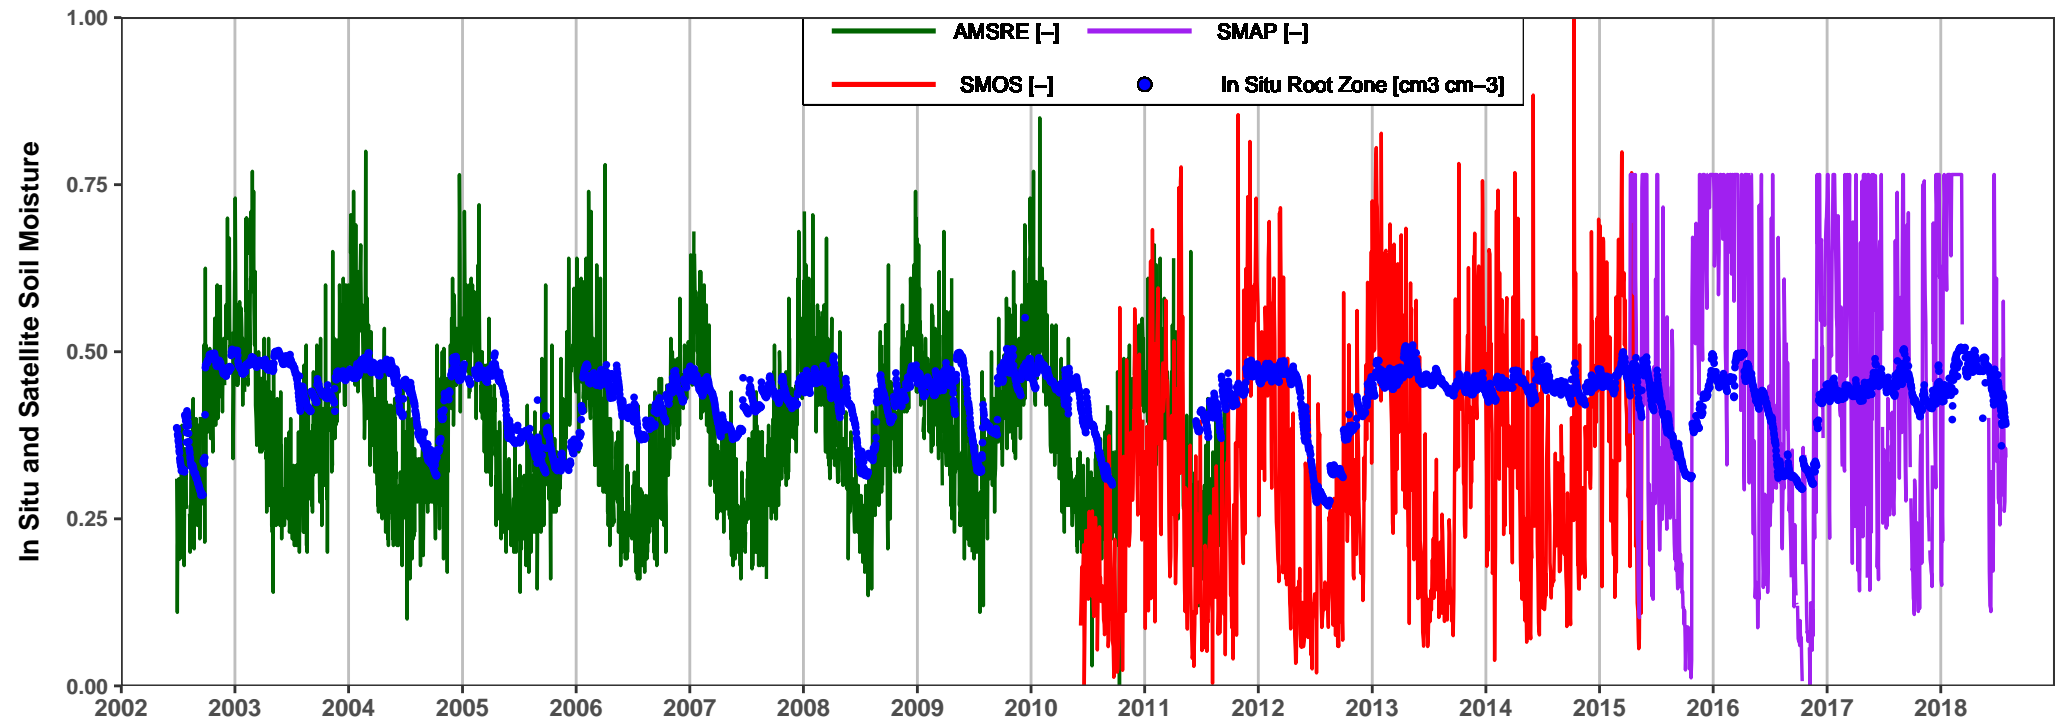

# Site: Watkinsville1

AMSRE Average

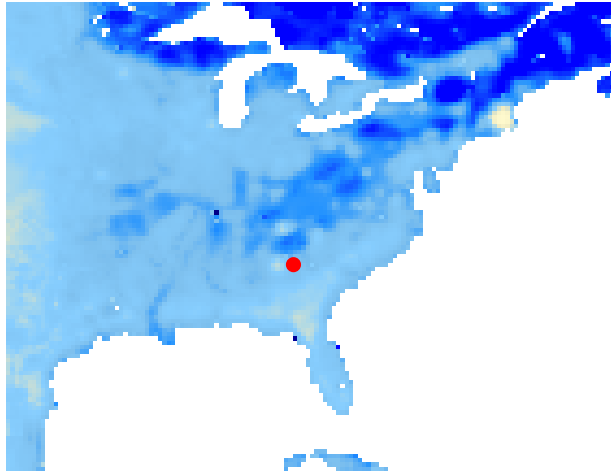

SMOS Average

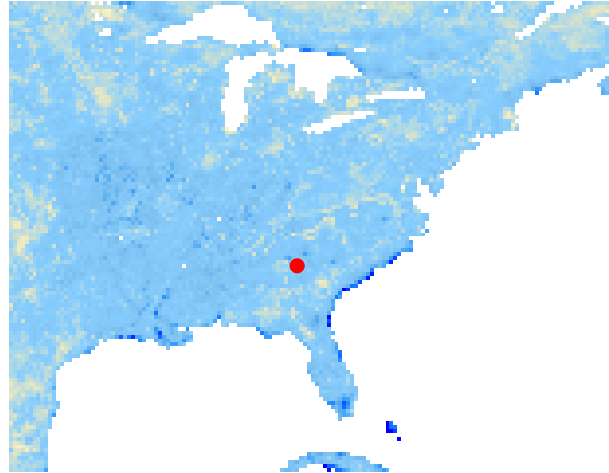

SMAP Average

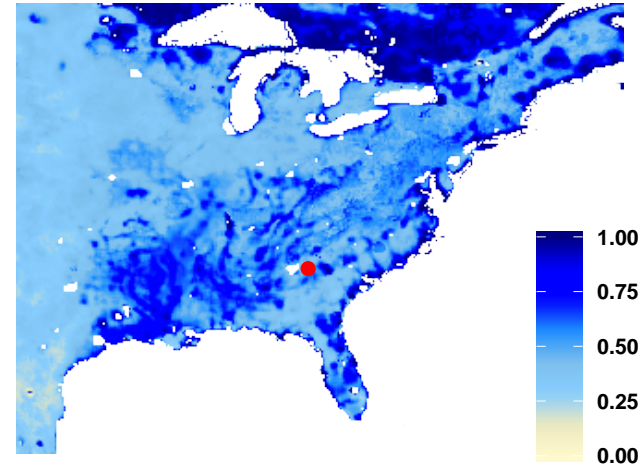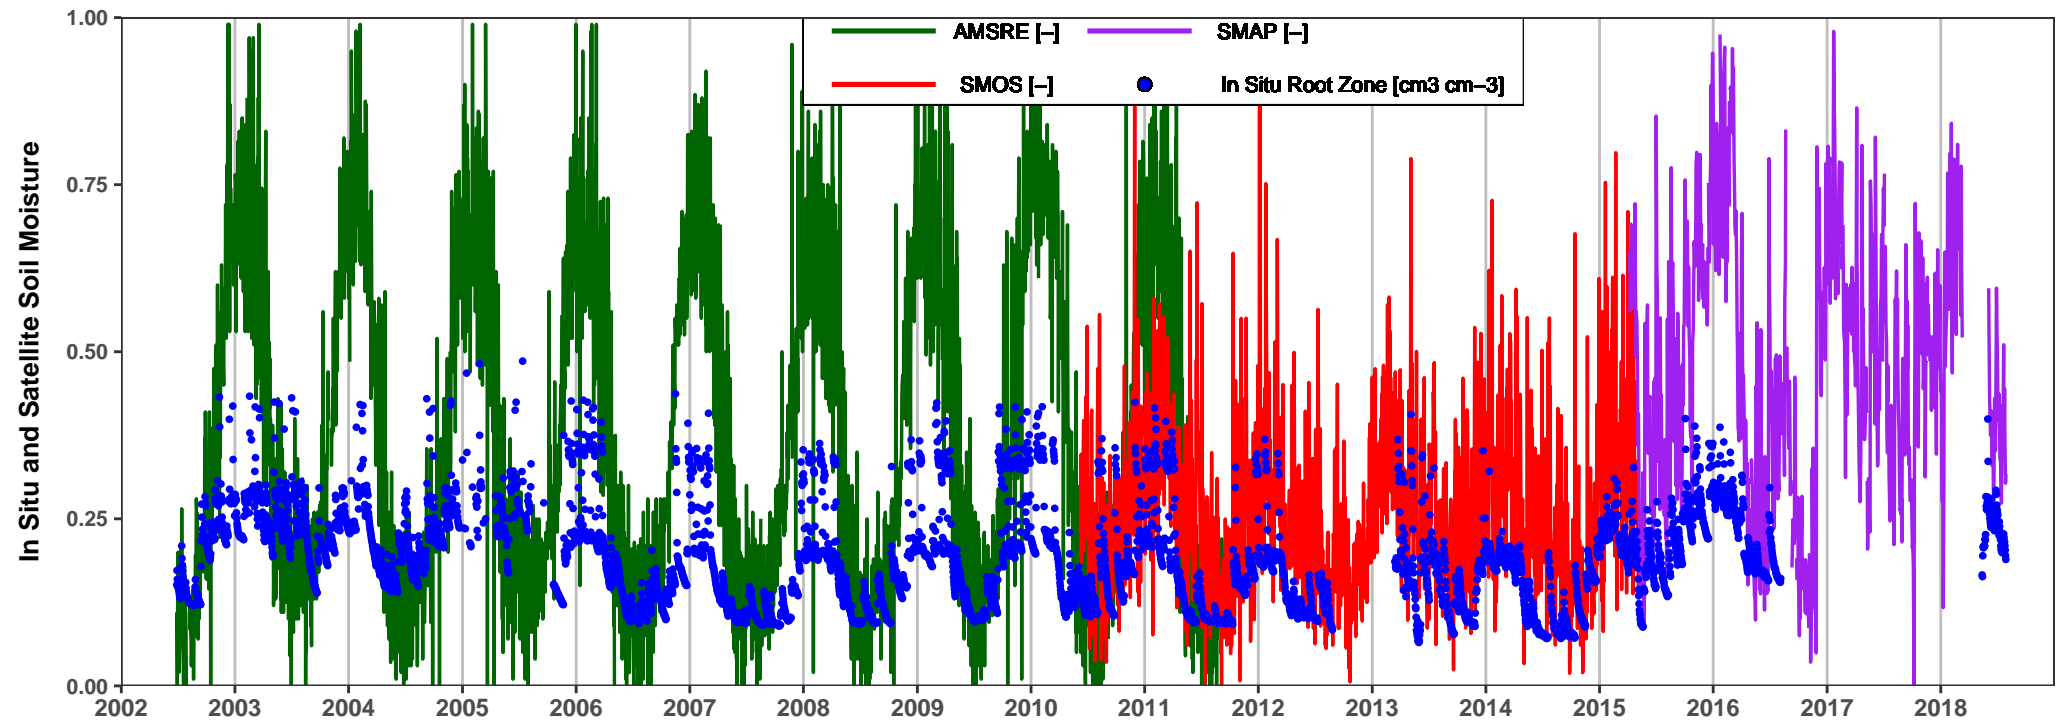



## Site: Wtars

AMSRE Average

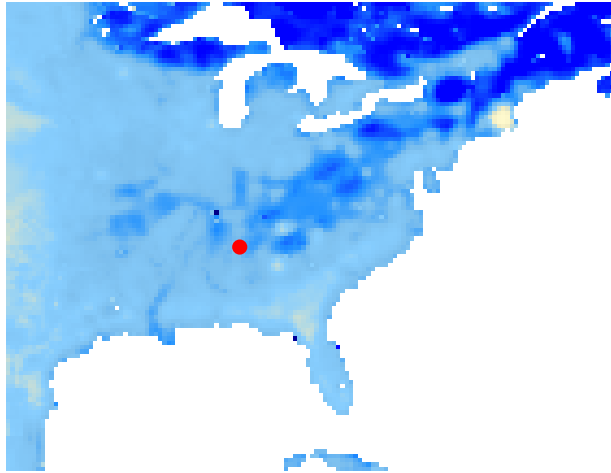

SMOS Average

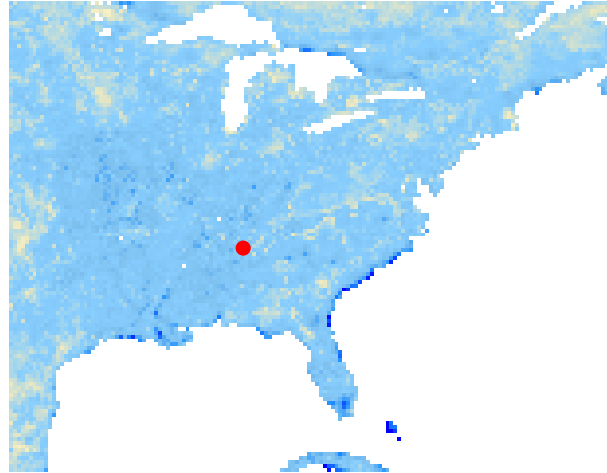

SMAP Average

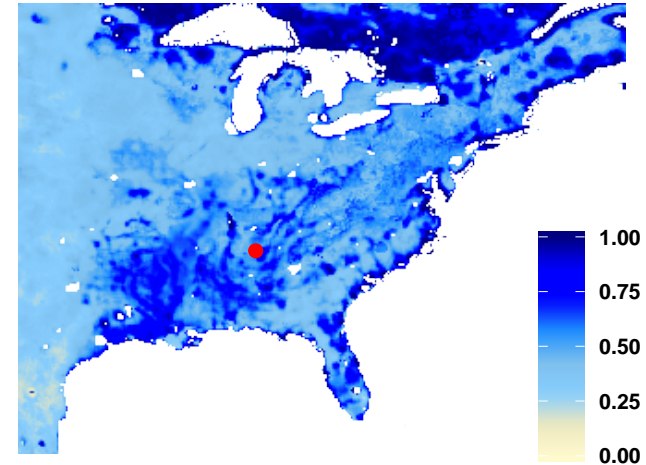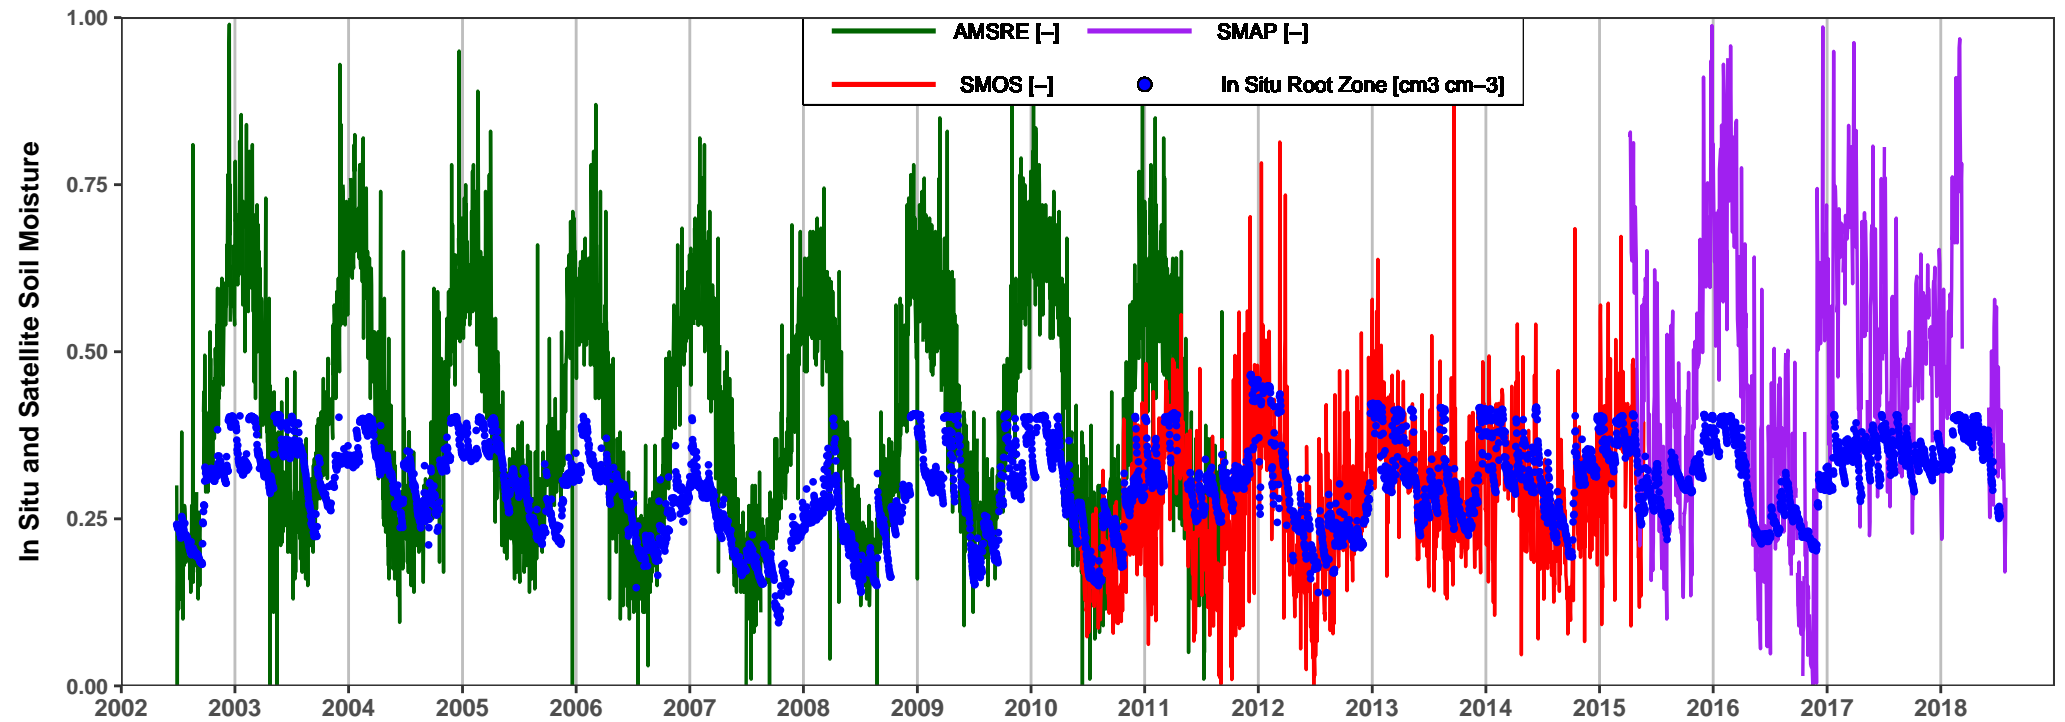

# Site: YoumansFarm

AMSRE Average

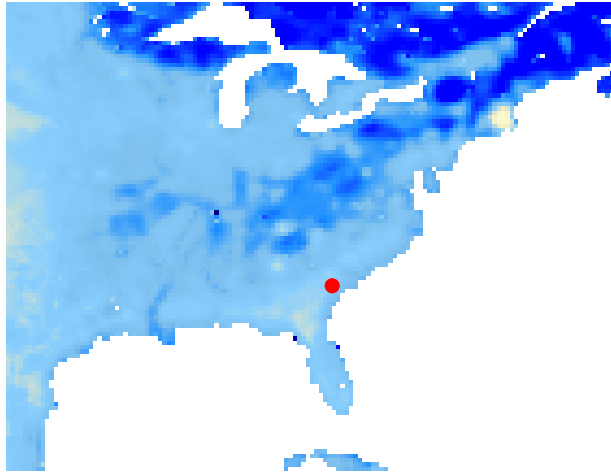

SMOS Average

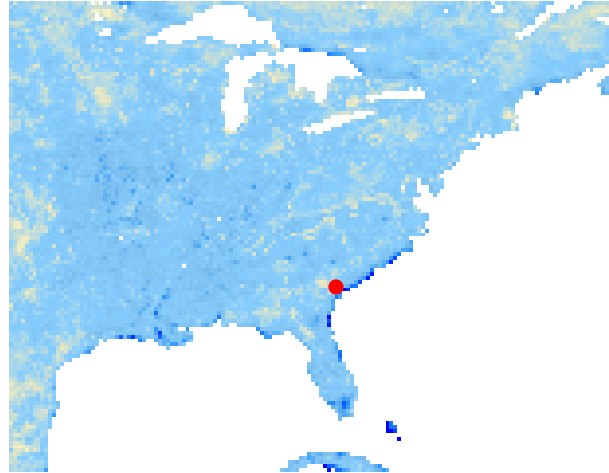

SMAP Average

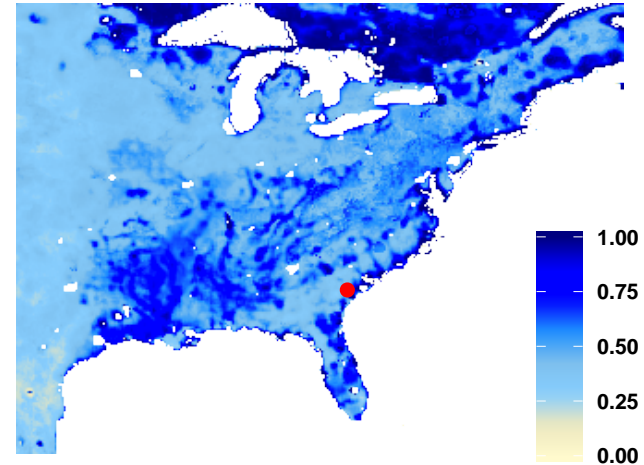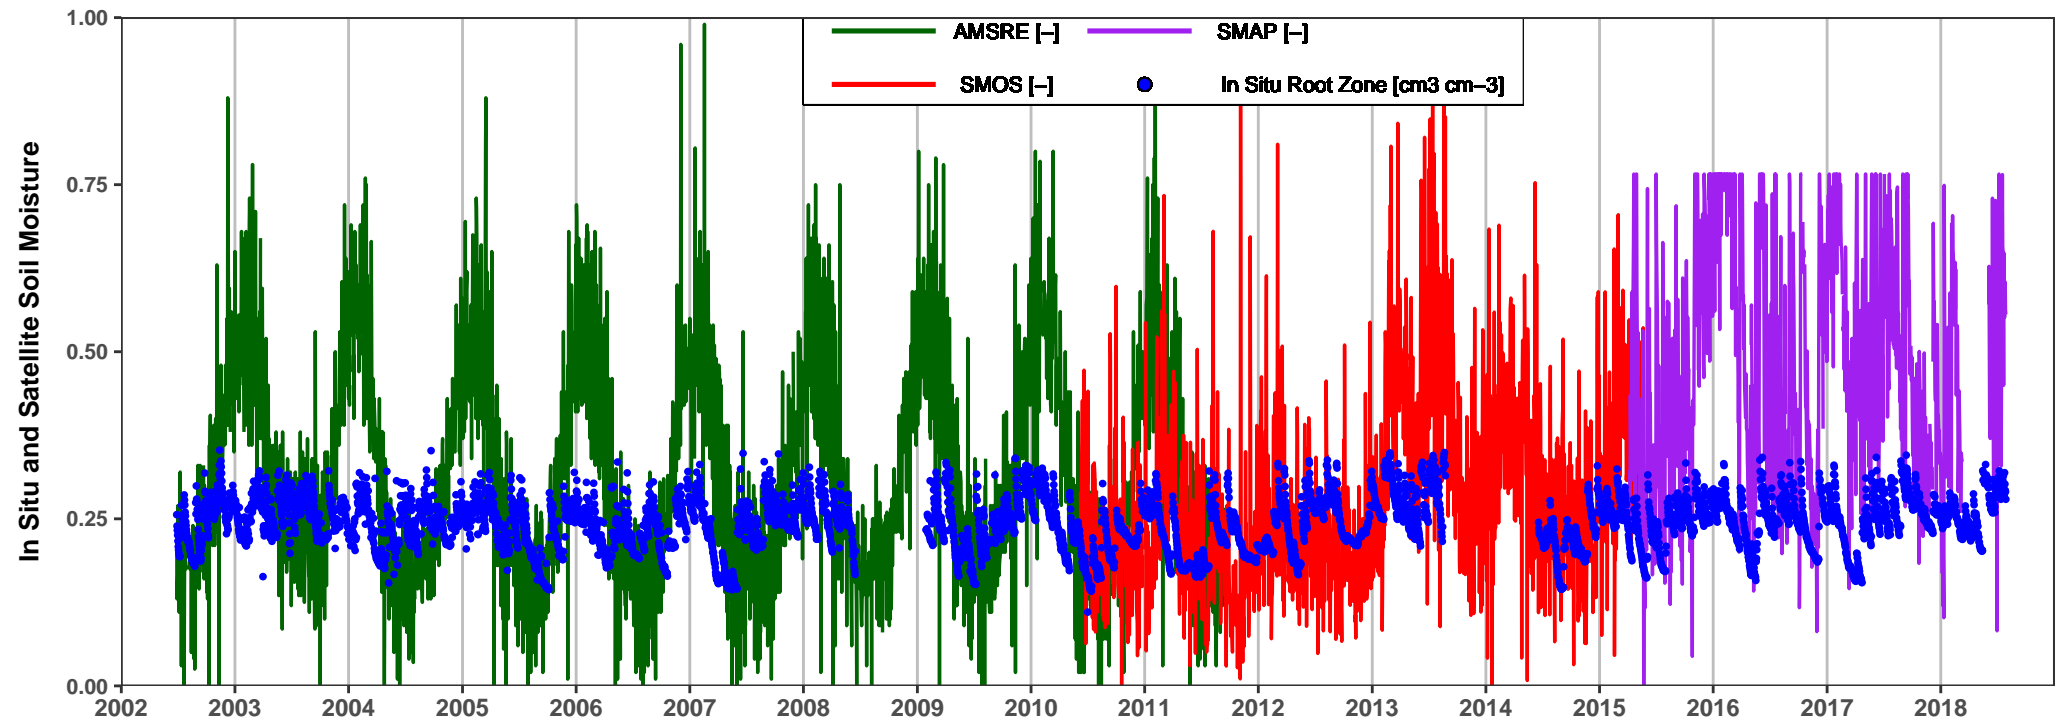

Site: US\_CaV

AMSRE Average

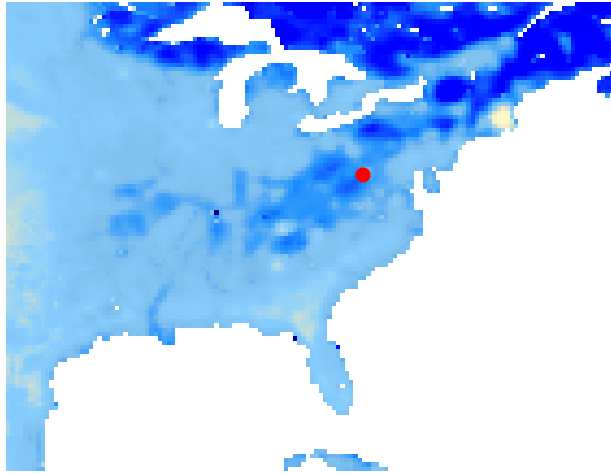

SMOS Average

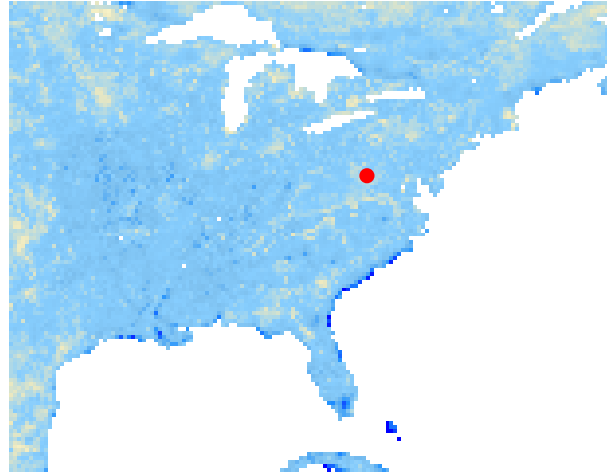

SMAP Average

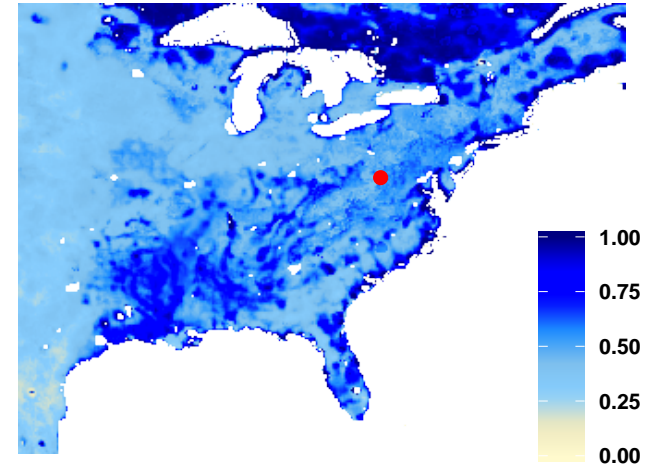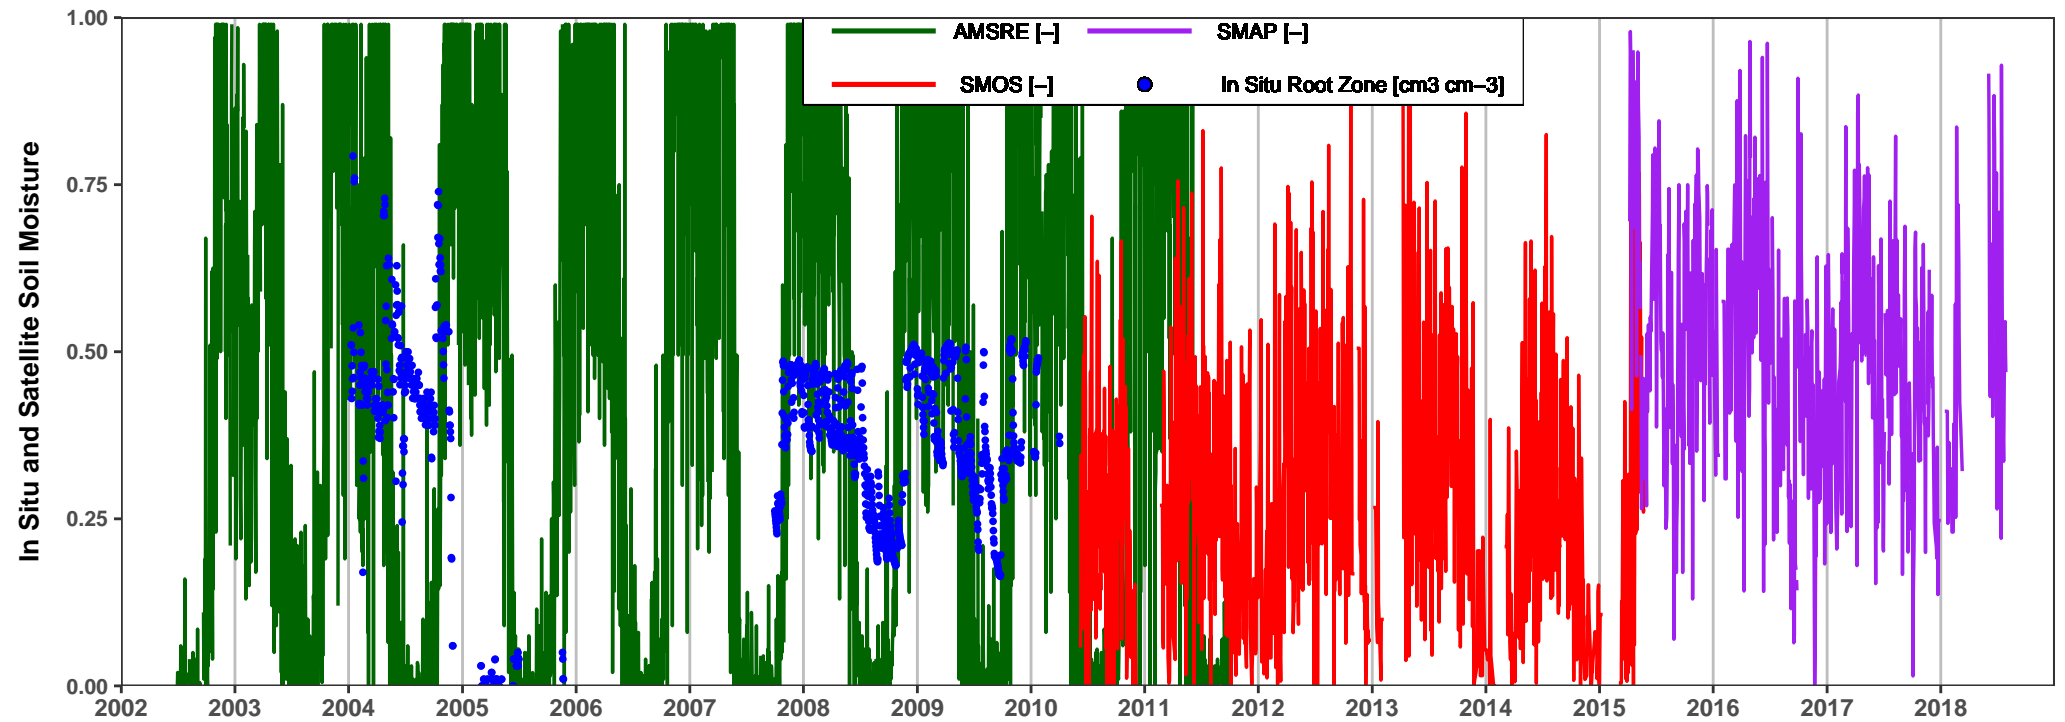

Site: US\_Ho1

AMSRE Average

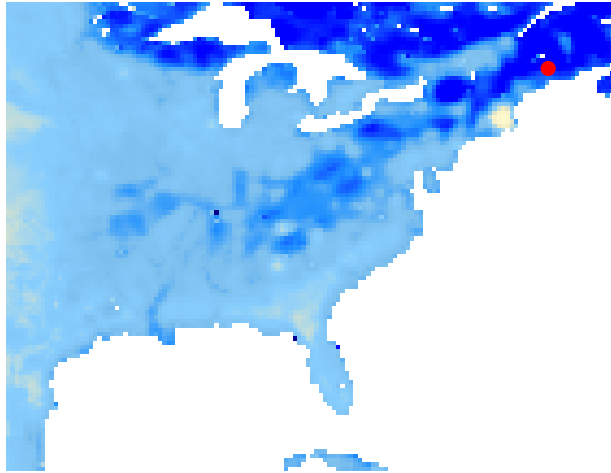

SMOS Average

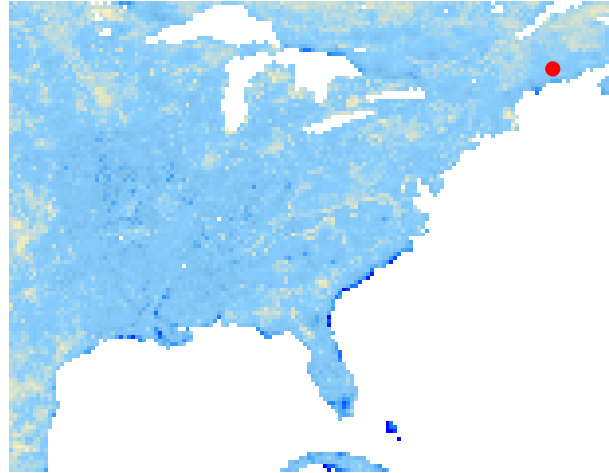

SMAP Average

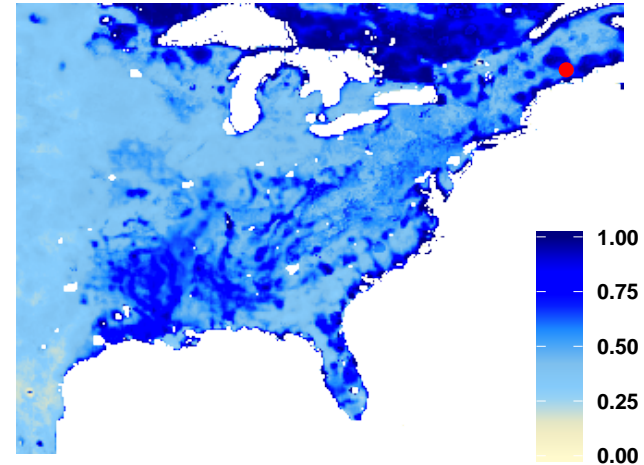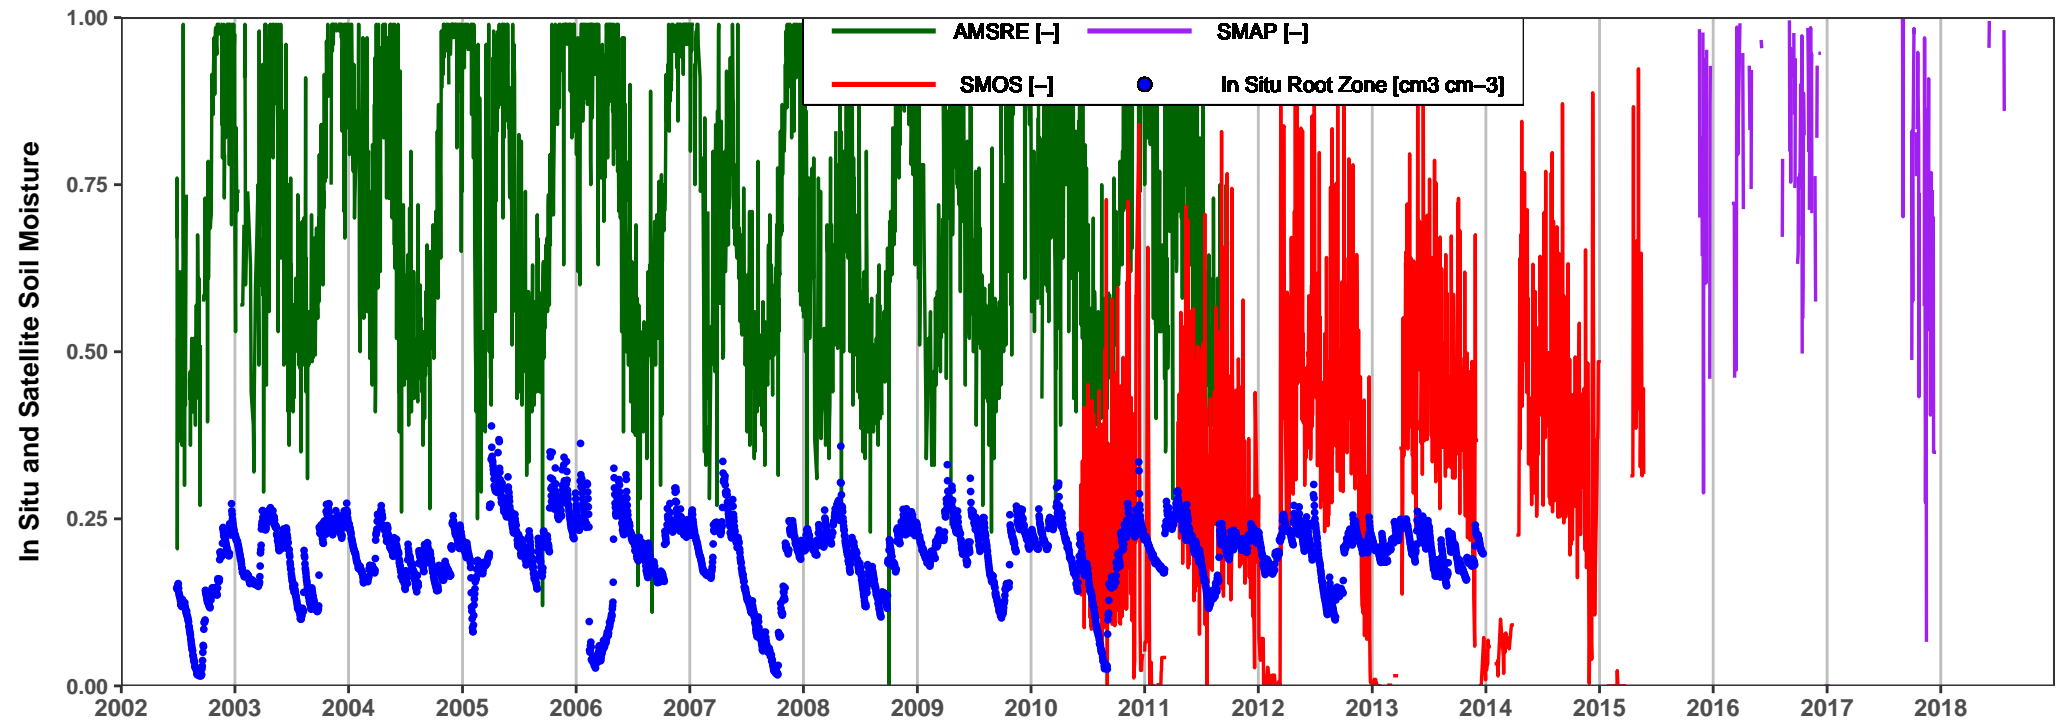

Site: US\_WBW

AMSRE Average

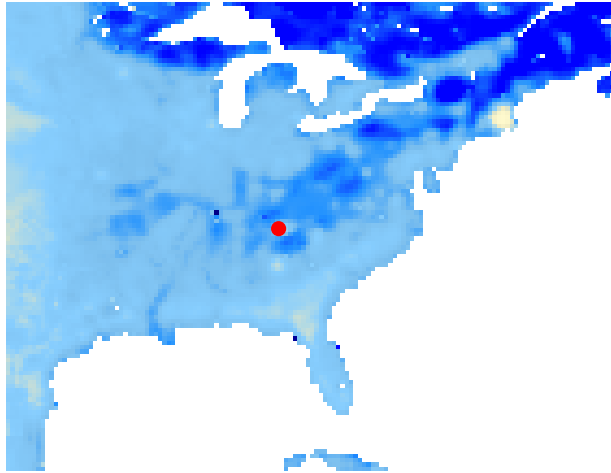

SMOS Average

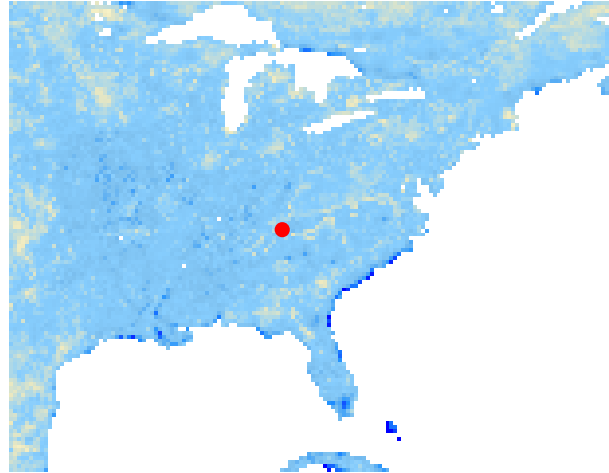

SMAP Average

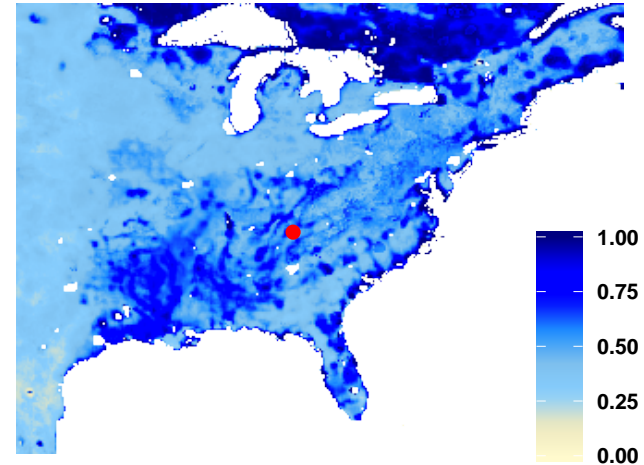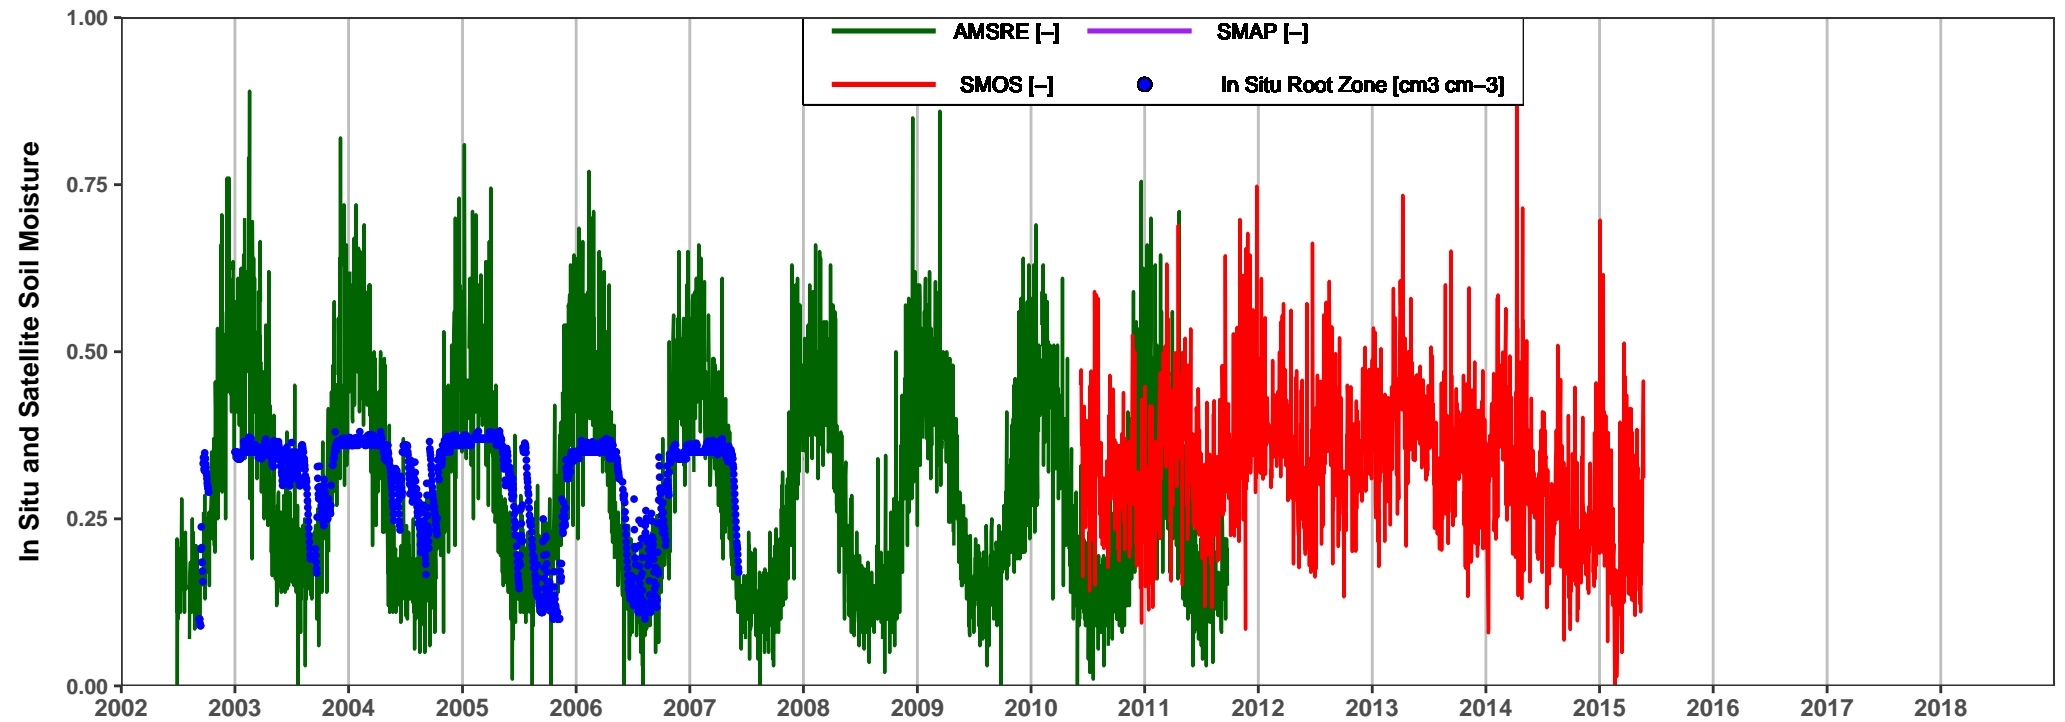

Supplement: s1 [file s1]
