# Supplementary material
Source: MDPI journal article supplement (https://www.mdpi.com/2072-4292/11/17/2013)
Supplement: s1 [file s1]

**Table S1:** List of all SCAN/SNOTEL and AMERIFLUX network sites used in this research with date ranges corresponding to training datasets used for regional SMAR model calibration.

| Site              | Figure 1 Number | Database    | AMSRE Date Range        | SMOS Date Range         | SMAP Date Range         | CONUS Root Zone Porosity [cm <sup>3</sup> cm <sup>-3</sup> ] | Adjusted Root Zone Porosity [cm <sup>3</sup> cm <sup>-3</sup> ] |
|-------------------|-----------------|-------------|-------------------------|-------------------------|-------------------------|--------------------------------------------------------------|-----------------------------------------------------------------|
| AAMU_JTG          | 1               | SCAN/SNOTEL | 2007-03-23 - 2010-08-29 | 2011-05-18 - 2015-05-23 | 2015-04-08 - 2018-03-11 | 0.471                                                        | 0.471                                                           |
| AllenFarms        | 2               | SCAN/SNOTEL | 2007-01-01 - 2011-09-01 | 2011-01-01 - 2015-05-23 | 2016-08-17 - 2018-03-11 | 0.501                                                        | 0.501                                                           |
| BeasleyLake       | 3               | SCAN/SNOTEL | 2003-01-01 - 2007-12-31 | 2011-03-31 - 2015-05-23 | 2015-04-08 - 2018-03-11 | 0.471                                                        | 0.612                                                           |
| BraggFarm         | 4               | SCAN/SNOTEL | 2003-08-26 - 2008-12-31 | 2011-01-01 - 2014-09-12 | 2015-06-13 - 2018-03-11 | 0.471                                                        | 0.565                                                           |
| BroadAcres        | 5               | SCAN/SNOTEL | --                      | 2012-01-01 - 2015-05-23 | 2015-04-08 - 2018-03-11 | 0.479                                                        | 0.647                                                           |
| CrescentLakes     | 6               | SCAN/SNOTEL | 2002-06-28 - 2008-05-02 | 2011-01-01 - 2015-05-23 | 2015-04-08 - 2018-03-11 | 0.453                                                        | 0.453                                                           |
| Cullman_NAHC      | 7               | SCAN/SNOTEL | 2006-05-18 - 2011-08-02 | 2011-01-01 - 2015-05-23 | 2015-04-08 - 2017-07-01 | 0.501                                                        | 0.501                                                           |
| DeeRiverRanch     | 8               | SCAN/SNOTEL | --                      | 2010-06-01 - 2012-04-01 | 2015-04-08 - 2018-03-11 | 0.475                                                        | 0.665                                                           |
| Dexter            | 9               | SCAN/SNOTEL | 2005-01-01 - 2007-03-22 | 2011-01-01 - 2015-05-23 | 2015-04-08 - 2018-03-11 | 0.463                                                        | 0.463                                                           |
| EastviewFarm      | 10              | SCAN/SNOTEL | 2005-01-01 - 2010-12-31 | 2011-01-01 - 2015-05-23 | 2015-04-08 - 2018-03-11 | 0.471                                                        | 0.471                                                           |
| ElsberryPMC       | 11              | SCAN/SNOTEL | --                      | --                      | 2015-08-05 - 2018-03-11 | 0.501                                                        | 0.501                                                           |
| Geneva1           | 12              | SCAN/SNOTEL | 2003-01-01 - 2011-12-31 | 2011-01-01 - 2015-05-23 | 2015-04-08 - 2018-03-11 | 0.501                                                        | 0.501                                                           |
| GlacialRidge      | 13              | SCAN/SNOTEL | 2002-06-28 - 2007-11-21 | 2011-01-01 - 2014-12-30 | 2015-04-08 - 2017-12-10 | 0.453                                                        | 0.453                                                           |
| GoodwinCkPasture  | 14              | SCAN/SNOTEL | 2007-02-27 - 2009-05-27 | 2011-01-01 - 2015-05-23 | 2015-04-08 - 2018-03-11 | 0.501                                                        | 0.501                                                           |
| GoodwinCkTimber   | 15              | SCAN/SNOTEL | 2006-01-01 - 2009-06-16 | 2012-01-01 - 2015-05-23 | 2015-04-08 - 2018-03-11 | 0.501                                                        | 0.551                                                           |
| Hodges            | 16              | SCAN/SNOTEL | 2003-01-01 - 2008-03-13 | --                      | 2015-04-08 - 2018-03-11 | 0.471                                                        | 0.471                                                           |
| HubbardBrook      | 17              | SCAN/SNOTEL | --                      | --                      | 2015-04-08 - 2016-11-28 | 0.453                                                        | 0.453                                                           |
| JournaganRanch    | 18              | SCAN/SNOTEL | --                      | 2013-01-01 - 2015-05-23 | 2015-04-08 - 2018-03-11 | 0.471                                                        | 0.495                                                           |
| KoptisFarms       | 19              | SCAN/SNOTEL | --                      | 2010-05-08 - 2015-03-08 | 2015-07-15 - 2018-03-11 | 0.463                                                        | 0.463                                                           |
| LittleRiver       | 20              | SCAN/SNOTEL | 2003-01-01 - 2010-12-31 | 2011-01-01 - 2015-05-23 | 2015-04-08 - 2018-03-11 | 0.453                                                        | 0.453                                                           |
| LivingstonUWA     | 21              | SCAN/SNOTEL | 2007-01-01 - 2010-12-31 | 2011-01-01 - 2015-05-23 | 2015-04-08 - 2018-03-11 | 0.463                                                        | 0.463                                                           |
| LyeBrook          | 22              | SCAN/SNOTEL | 2006-01-01 - 2010-12-31 | --                      | 2015-04-08 - 2017-11-01 | 0.501                                                        | 0.501                                                           |
| MahantangoCk      | 23              | SCAN/SNOTEL | 2003-01-01 - 2008-12-31 | --                      | 2015-04-08 - 2018-03-11 | 0.501                                                        | 0.501                                                           |
| MammothCave       | 24              | SCAN/SNOTEL | 2004-01-01 - 2010-12-31 | 2011-01-01 - 2015-05-23 | 2015-04-08 - 2018-03-11 | 0.501                                                        | 0.541                                                           |
| MascomaRiver      | 25              | SCAN/SNOTEL | 2003-01-01 - 2010-12-31 | --                      | 2015-04-08 - 2016-12-12 | 0.453                                                        | 0.453                                                           |
| Mason1            | 26              | SCAN/SNOTEL | --                      | 2011-01-01 - 2015-05-23 | 2015-04-08 - 2018-03-11 | 0.453                                                        | 0.453                                                           |
| Mayday            | 27              | SCAN/SNOTEL | 2006-01-01 - 2007-12-31 | 2011-01-01 - 2013-12-31 | 2015-04-08 - 2018-03-11 | 0.479                                                        | 0.695                                                           |
| McAllisterFarm    | 28              | SCAN/SNOTEL | 2004-01-01 - 2010-12-31 | 2013-01-01 - 2015-05-23 | 2015-04-08 - 2018-03-11 | 0.501                                                        | 0.501                                                           |
| MollyCaren1       | 29              | SCAN/SNOTEL | --                      | 2011-01-01 - 2015-05-23 | 2015-04-08 - 2018-03-11 | 0.501                                                        | 0.516                                                           |
| MorrisFarms       | 30              | SCAN/SNOTEL | --                      | 2012-01-01 - 2014-09-17 | 2016-01-01 - 2018-03-11 | 0.463                                                        | 0.535                                                           |
| MountMansfield    | 31              | SCAN/SNOTEL | 2005-01-01 - 2007-12-31 | --                      | --                      | 0.501                                                        | 0.561                                                           |
| MtVernon          | 32              | SCAN/SNOTEL | 2005-01-01 - 2009-12-31 | 2013-01-01 - 2015-05-23 | 2015-04-08 - 2018-03-11 | 0.501                                                        | 0.501                                                           |
| NPiedmonthArec    | 33              | SCAN/SNOTEL | 2004-01-01 - 2010-12-31 | 2011-01-01 - 2015-05-23 | 2015-04-08 - 2018-03-11 | 0.471                                                        | 0.471                                                           |
| PeeDee            | 34              | SCAN/SNOTEL | 2003-01-01 - 2010-12-31 | --                      | 2015-05-23 - 2018-03-11 | 0.453                                                        | 0.453                                                           |
| PerdidoRivFarms   | 35              | SCAN/SNOTEL | --                      | 2013-01-01 - 2015-05-23 | 2015-04-08 - 2018-03-11 | 0.463                                                        | 0.463                                                           |
| Perthshire        | 36              | SCAN/SNOTEL | 2003-01-01 - 2010-12-31 | 2011-01-01 - 2015-05-23 | 2015-04-08 - 2018-03-11 | 0.471                                                        | 0.471                                                           |
| PowderMill        | 37              | SCAN/SNOTEL | 2004-01-01 - 2010-12-31 | 2013-01-01 - 2015-05-23 | 2015-04-08 - 2018-03-11 | 0.463                                                        | 0.463                                                           |
| Princeton1        | 38              | SCAN/SNOTEL | 2004-01-01 - 2010-12-31 | --                      | 2016-01-01 - 2018-03-11 | 0.501                                                        | 0.551                                                           |
| ReynoldsHomestead | 39              | SCAN/SNOTEL | 2005-01-01 - 2010-12-31 | --                      | 2015-04-08 - 2018-03-11 | 0.464                                                        | 0.464                                                           |
| RockSprings       | 40              | SCAN/SNOTEL | 2005-01-01 - 2010-12-31 | --                      | 2015-04-08 - 2018-03-11 | 0.463                                                        | 0.463                                                           |
| SandyRidge        | 41              | SCAN/SNOTEL | 2008-01-01 - 2010-12-31 | 2013-01-01 - 2015-05-23 | 2015-04-08 - 2018-03-11 | 0.479                                                        | 0.479                                                           |
| Scott             | 42              | SCAN/SNOTEL | 2008-01-01 - 2010-09-15 | 2012-01-01 - 2015-04-06 | 2015-09-19 - 2018-03-11 | 0.471                                                        | 0.528                                                           |
| SellersLake1      | 43              | SCAN/SNOTEL | 2006-01-01 - 2007-06-12 | 2013-01-01 - 2015-05-23 | 2015-04-08 - 2018-03-11 | 0.437                                                        | 0.437                                                           |
| Selma             | 44              | SCAN/SNOTEL | --                      | 2013-01-01 - 2015-05-22 | 2016-01-01 - 2018-03-11 | 0.463                                                        | 0.463                                                           |
| Shenandoah        | 45              | SCAN/SNOTEL | 2005-01-01 - 2010-12-31 | 2011-01-01 - 2015-05-23 | 2015-04-08 - 2018-03-11 | 0.471                                                        | 0.471                                                           |
| SilverCity        | 46              | SCAN/SNOTEL | 2005-01-01 - 2009-12-31 | 2013-01-01 - 2015-05-23 | 2015-04-08 - 2018-03-11 | 0.471                                                        | 0.518                                                           |
| StanleyFarm       | 47              | SCAN/SNOTEL | 2007-03-14 - 2010-12-31 | 2011-01-01 - 2015-02-16 | 2015-06-11 - 2018-03-11 | 0.501                                                        | 0.501                                                           |
| Starkville        | 48              | SCAN/SNOTEL | 2006-01-01 - 2009-12-15 | 2013-01-01 - 2015-05-23 | 2015-04-08 - 2018-03-11 | 0.479                                                        | 0.527                                                           |
| SudduthFarms      | 49              | SCAN/SNOTEL | --                      | 2013-01-01 - 2015-05-19 | 2015-04-26 - 2018-03-11 | 0.501                                                        | 0.501                                                           |
| SunleafNursery    | 50              | SCAN/SNOTEL | --                      | 2012-01-01 - 2015-05-23 | 2015-04-08 - 2018-03-11 | 0.453                                                        | 0.453                                                           |
| Tidewater1        | 51              | SCAN/SNOTEL | 2009-01-01 - 2011-10-01 | 2011-01-01 - 2015-01-01 | --                      | 0.464                                                        | 0.464                                                           |
| TidewaterArec     | 52              | SCAN/SNOTEL | 2004-01-01 - 2010-12-31 | --                      | 2015-04-08 - 2018-03-11 | 0.463                                                        | 0.463                                                           |
| TncFortBayou      | 53              | SCAN/SNOTEL | 2004-01-01 - 2010-12-31 | 2011-01-01 - 2015-05-23 | 2015-04-08 - 2018-03-11 | 0.463                                                        | 0.463                                                           |
| Tunica            | 54              | SCAN/SNOTEL | 2004-01-01 - 2007-12-31 | 2011-01-01 - 2014-08-09 | 2016-01-01 - 2018-01-01 | 0.471                                                        | 0.471                                                           |
| Tuskegee          | 55              | SCAN/SNOTEL | 2007-01-01 - 2010-12-31 | 2011-01-01 - 2015-05-23 | --                      | 0.463                                                        | 0.463                                                           |
| UapbCampusPB      | 56              | SCAN/SNOTEL | 2005-01-01 - 2010-12-31 | 2011-01-01 - 2015-05-23 | 2015-04-08 - 2018-03-11 | 0.453                                                        | 0.453                                                           |
| UapbDewitt        | 57              | SCAN/SNOTEL | 2006-01-01 - 2010-12-31 | 2011-01-01 - 2015-05-23 | 2015-04-08 - 2018-03-11 | 0.501                                                        | 0.501                                                           |
| UapbEarle         | 58              | SCAN/SNOTEL | 2005-01-01 - 2010-12-31 | 2011-01-01 - 2015-05-23 | 2015-04-08 - 2018-03-11 | 0.501                                                        | 0.501                                                           |
| UapbMarianna      | 59              | SCAN/SNOTEL | 2005-01-01 - 2007-12-27 | 2012-01-01 - 2015-05-23 | 2015-04-08 - 2018-03-11 | 0.501                                                        | 0.501                                                           |
| UapbPointRemove   | 60              | SCAN/SNOTEL | 2005-01-01 - 2009-12-31 | 2011-01-01 - 2014-12-31 | 2015-04-08 - 2018-03-11 | 0.463                                                        | 0.463                                                           |
| US_CaV            | 61              | AMERIFLUX   | 2008-01-01 - 2009-12-16 | --                      | --                      | 0.501                                                        | 0.551                                                           |
| US_Ho1            | 62              | AMERIFLUX   | 2004-01-01 - 2010-12-31 | --                      | --                      | 0.501                                                        | 0.501                                                           |
| US_WBW            | 63              | AMERIFLUX   | 2004-01-01 - 2007-06-07 | --                      | --                      | 0.471                                                        | 0.471                                                           |
| UWPlatteville     | 64              | SCAN/SNOTEL | --                      | --                      | 2015-04-08 - 2018-01-01 | 0.501                                                        | 0.501                                                           |
| Vance             | 65              | SCAN/SNOTEL | --                      | --                      | 2015-04-08 - 2018-03-11 | 0.471                                                        | 0.518                                                           |
| Watkinsville1     | 66              | SCAN/SNOTEL | 2004-01-01 - 2009-12-31 | --                      | --                      | 0.464                                                        | 0.464                                                           |
| Wtars             | 67              | SCAN/SNOTEL | 2004-01-01 - 2010-12-31 | 2011-01-01 - 2015-05-23 | 2015-04-08 - 2018-03-11 | 0.471                                                        | 0.471                                                           |
| YoumansFarm       | 68              | SCAN/SNOTEL | 2004-01-01 - 2008-06-16 | 2011-01-01 - 2013-08-24 | 2015-04-08 - 2018-03-11 | 0.453                                                        | 0.453                                                           |

**Table S2:** List of Gelman-Rubin statistics and root mean square error (RMSE) between calibrated model predictions with training data at all sites used in this research.

| Site                | AMSRE<br>S <sub>c</sub> GR | AMSRE<br>a GR | AMSRE<br>b GR | AMSRE<br>S <sub>w</sub> GR | AMSRE RMSE<br>[cm <sup>3</sup> cm <sup>-3</sup> ] | SMOS<br>S <sub>c</sub> GR | SMOS<br>a GR | SMOS<br>b GR | SMOS<br>S <sub>w</sub> GR | SMOS RMSE<br>[cm <sup>3</sup> cm <sup>-3</sup> ] | SMAP<br>S <sub>c</sub> GR | SMAP<br>a GR | SMAP<br>b GR | SMAP<br>S <sub>w</sub> GR | SMAP RMSE<br>[cm <sup>3</sup> cm <sup>-3</sup> ] |
|---------------------|----------------------------|---------------|---------------|----------------------------|---------------------------------------------------|---------------------------|--------------|--------------|---------------------------|--------------------------------------------------|---------------------------|--------------|--------------|---------------------------|--------------------------------------------------|
| Shale Hills Site 15 | 1.00                       | 1.00          | 1.00          | 1.00                       | 0.032                                             | --                        | --           | --           | --                        | --                                               | --                        | --           | --           | --                        | --                                               |
| Shale Hills Site 51 | 1.00                       | 1.01          | 1.00          | 1.00                       | 0.026                                             | --                        | --           | --           | --                        | --                                               | --                        | --           | --           | --                        | --                                               |
| Shale Hills Site 55 | 1.00                       | 1.00          | 1.00          | 1.00                       | 0.027                                             | --                        | --           | --           | --                        | --                                               | --                        | --           | --           | --                        | --                                               |
| Shale Hills Site 60 | 1.00                       | 1.00          | 1.00          | 1.00                       | 0.019                                             | --                        | --           | --           | --                        | --                                               | --                        | --           | --           | --                        | --                                               |
| Shale Hills Site 61 | 1.00                       | 1.00          | 1.00          | 1.00                       | 0.021                                             | --                        | --           | --           | --                        | --                                               | --                        | --           | --           | --                        | --                                               |
| AAMU_JTG            | 1.02                       | 1.00          | 1.00          | 1.02                       | 0.033                                             | 1.00                      | 1.00         | 1.00         | 1.00                      | 0.029                                            | 1.00                      | 1.01         | 1.00         | 1.00                      | 0.031                                            |
| AllenFarms          | 1.00                       | 1.01          | 1.01          | 1.00                       | 0.056                                             | 1.02                      | 1.00         | 1.00         | 1.01                      | 0.052                                            | 1.00                      | 1.00         | 1.00         | 1.00                      | 0.050                                            |
| BeasleyLake         | 1.01                       | 1.00          | 1.01          | 1.01                       | 0.059                                             | 1.02                      | 1.01         | 1.01         | 1.02                      | 0.048                                            | 1.00                      | 1.00         | 1.00         | 1.00                      | 0.044                                            |
| BraggFarm           | 1.00                       | 1.00          | 1.00          | 1.00                       | 0.053                                             | 1.03                      | 1.01         | 1.01         | 1.02                      | 0.048                                            | 1.00                      | 1.00         | 1.00         | 1.00                      | 0.027                                            |
| BroadAcres          | --                         | --            | --            | --                         | --                                                | 1.00                      | 1.00         | 1.00         | 1.01                      | 0.062                                            | 1.00                      | 1.04         | 1.04         | 1.00                      | 0.073                                            |
| CrescentLakes       | 1.00                       | 1.00          | 1.00          | 1.00                       | 0.047                                             | 1.00                      | 1.00         | 1.00         | 1.00                      | 0.043                                            | 1.02                      | 1.02         | 1.02         | 1.01                      | 0.024                                            |
| Cullman_NAHRC       | 1.00                       | 1.00          | 1.00          | 1.00                       | 0.045                                             | 1.00                      | 1.00         | 1.00         | 1.00                      | 0.050                                            | 1.00                      | 1.00         | 1.00         | 1.00                      | 0.050                                            |
| DeeRiverRanch       | --                         | --            | --            | --                         | --                                                | 1.00                      | 1.00         | 1.00         | 1.00                      | 0.093                                            | 1.03                      | 1.01         | 1.02         | 1.03                      | 0.049                                            |
| Dexter              | 1.00                       | 1.01          | 1.01          | 1.00                       | 0.076                                             | 1.02                      | 1.02         | 1.03         | 1.02                      | 0.025                                            | 1.01                      | 1.00         | 1.00         | 1.00                      | 0.016                                            |
| EastviewFarm        | 1.01                       | 1.00          | 1.00          | 1.01                       | 0.038                                             | 1.00                      | 1.02         | 1.02         | 1.00                      | 0.023                                            | 1.01                      | 1.01         | 1.00         | 1.00                      | 0.020                                            |
| ElsberryPMC         | --                         | --            | --            | --                         | --                                                | --                        | --           | --           | --                        | --                                               | 1.01                      | 1.00         | 1.00         | 1.01                      | 0.041                                            |
| Geneva1             | 1.00                       | 1.00          | 1.00          | 1.00                       | 0.068                                             | 1.00                      | 1.01         | 1.01         | 1.01                      | 0.082                                            | 1.00                      | 1.01         | 1.01         | 1.00                      | 0.055                                            |
| GlacialRidge        | 1.00                       | 1.00          | 1.00          | 1.00                       | 0.057                                             | 1.00                      | 1.00         | 1.00         | 1.00                      | 0.052                                            | 1.00                      | 1.00         | 1.00         | 1.00                      | 0.187                                            |
| GoodwinCkPasture    | 1.00                       | 1.01          | 1.02          | 1.00                       | 0.108                                             | 1.01                      | 1.01         | 1.00         | 1.00                      | 0.038                                            | 1.00                      | 1.00         | 1.00         | 1.01                      | 0.038                                            |
| GoodwinCkTimber     | 1.00                       | 1.00          | 1.01          | 1.00                       | 0.071                                             | 1.00                      | 1.01         | 1.00         | 1.00                      | 0.084                                            | 1.00                      | 1.00         | 1.01         | 1.00                      | 0.062                                            |
| Hodges              | 1.00                       | 1.00          | 1.00          | 1.00                       | 0.046                                             | --                        | --           | --           | --                        | --                                               | 1.00                      | 1.00         | 1.00         | 1.00                      | 0.077                                            |
| HubbardBrook        | --                         | --            | --            | --                         | --                                                | --                        | --           | --           | --                        | --                                               | 1.04                      | 1.02         | 1.02         | 1.01                      | 0.039                                            |
| JournaganRanch      | --                         | --            | --            | --                         | --                                                | 1.00                      | 1.00         | 1.00         | 1.00                      | 0.068                                            | 1.00                      | 1.00         | 1.00         | 1.00                      | 0.087                                            |
| KoptisFarms         | --                         | --            | --            | --                         | --                                                | 1.01                      | 1.01         | 1.00         | 1.00                      | 0.040                                            | 1.01                      | 1.01         | 1.01         | 1.00                      | 0.061                                            |
| LittleRiver         | 1.00                       | 1.01          | 1.01          | 1.00                       | 0.036                                             | 1.00                      | 1.00         | 1.01         | 1.00                      | 0.021                                            | 1.01                      | 1.01         | 1.00         | 1.01                      | 0.023                                            |
| LivingstonUWA       | 1.03                       | 1.00          | 1.00          | 1.02                       | 0.042                                             | 1.00                      | 1.01         | 1.00         | 1.00                      | 0.025                                            | 1.01                      | 1.02         | 1.01         | 1.01                      | 0.057                                            |
| LyeBrook            | 1.00                       | 1.00          | 1.00          | 1.00                       | 0.044                                             | --                        | --           | --           | --                        | --                                               | 1.00                      | 1.02         | 1.00         | 1.00                      | 0.063                                            |
| MahantangoCk        | 1.01                       | 1.00          | 1.00          | 1.01                       | 0.033                                             | --                        | --           | --           | --                        | --                                               | 1.00                      | 1.02         | 1.01         | 1.00                      | 0.043                                            |
| MammothCave         | 1.00                       | 1.01          | 1.01          | 1.00                       | 0.049                                             | 1.01                      | 1.00         | 1.00         | 1.00                      | 0.051                                            | 1.00                      | 1.01         | 1.01         | 1.00                      | 0.051                                            |
| MascomaRiver        | 1.00                       | 1.00          | 1.00          | 1.00                       | 0.041                                             | --                        | --           | --           | --                        | --                                               | 1.01                      | 1.01         | 1.04         | 1.01                      | 0.055                                            |
| Mason1              | --                         | --            | --            | --                         | --                                                | 1.00                      | 1.00         | 1.00         | 1.00                      | 0.060                                            | 1.00                      | 1.00         | 1.00         | 1.00                      | 0.057                                            |
| Mayday              | 1.01                       | 1.00          | 1.00          | 1.01                       | 0.157                                             | 1.00                      | 1.01         | 1.01         | 1.01                      | 0.130                                            | 1.01                      | 1.00         | 1.00         | 1.01                      | 0.113                                            |
| McAllisterFarm      | 1.01                       | 1.01          | 1.01          | 1.00                       | 0.043                                             | 1.00                      | 1.01         | 1.00         | 1.00                      | 0.059                                            | 1.00                      | 1.00         | 1.00         | 1.00                      | 0.029                                            |
| MollyCaren1         | --                         | --            | --            | --                         | --                                                | 1.00                      | 1.00         | 1.00         | 1.00                      | 0.057                                            | 1.00                      | 1.00         | 1.00         | 1.00                      | 0.071                                            |
| MorrisFarms         | --                         | --            | --            | --                         | --                                                | 1.00                      | 1.00         | 1.00         | 1.00                      | 0.044                                            | 1.01                      | 1.02         | 1.01         | 1.01                      | 0.062                                            |
| MountMansfield      | 1.00                       | 1.01          | 1.02          | 1.00                       | 0.059                                             | --                        | --           | --           | --                        | --                                               | --                        | --           | --           | --                        | --                                               |
| MtVernon            | 1.00                       | 1.00          | 1.00          | 1.00                       | 0.057                                             | 1.01                      | 1.00         | 1.00         | 1.01                      | 0.133                                            | 1.00                      | 1.00         | 1.00         | 1.00                      | 0.063                                            |
| NPiedmonthArec      | 1.01                       | 1.04          | 1.04          | 1.01                       | 0.023                                             | 1.00                      | 1.05         | 1.04         | 1.00                      | 0.027                                            | 1.00                      | 1.00         | 1.00         | 1.00                      | 0.036                                            |
| PeeDee              | 1.00                       | 1.00          | 1.00          | 1.00                       | 0.032                                             | --                        | --           | --           | --                        | --                                               | 1.00                      | 1.00         | 1.00         | 1.00                      | 0.040                                            |
| PerdidoRivFarms     | --                         | --            | --            | --                         | --                                                | 1.00                      | 1.01         | 1.00         | 1.00                      | 0.126                                            | 1.00                      | 1.00         | 1.00         | 1.00                      | 0.034                                            |
| Perthshire          | 1.01                       | 1.01          | 1.01          | 1.00                       | 0.034                                             | 1.00                      | 1.00         | 1.01         | 1.01                      | 0.022                                            | 1.02                      | 1.00         | 1.00         | 1.01                      | 0.036                                            |
| PowderMill          | 1.01                       | 1.00          | 1.00          | 1.01                       | 0.038                                             | 1.01                      | 1.06         | 1.00         | 1.00                      | 0.056                                            | 1.00                      | 1.00         | 1.00         | 1.00                      | 0.054                                            |
| Princeton1          | 1.02                       | 1.00          | 1.01          | 1.03                       | 0.060                                             | --                        | --           | --           | --                        | --                                               | 1.00                      | 1.00         | 1.00         | 1.00                      | 0.050                                            |
| ReynoldsHomestead   | 1.05                       | 1.00          | 1.00          | 1.01                       | 0.044                                             | --                        | --           | --           | --                        | --                                               | 1.00                      | 1.01         | 1.00         | 1.00                      | 0.054                                            |
| RockSprings         | 1.00                       | 1.01          | 1.01          | 1.00                       | 0.049                                             | --                        | --           | --           | --                        | --                                               | 1.00                      | 1.00         | 1.01         | 1.01                      | 0.191                                            |
| SandyRidge          | 1.00                       | 1.01          | 1.00          | 1.00                       | 0.102                                             | 1.01                      | 1.01         | 1.01         | 1.02                      | 0.075                                            | 1.00                      | 1.00         | 1.00         | 1.00                      | 0.122                                            |
| Scott               | 1.03                       | 1.00          | 1.00          | 1.03                       | 0.032                                             | 1.01                      | 1.00         | 1.00         | 1.01                      | 0.034                                            | 1.00                      | 1.00         | 1.00         | 1.00                      | 0.039                                            |
| SellersLake1        | 1.01                       | 1.02          | 1.01          | 1.00                       | 0.021                                             | 1.01                      | 1.00         | 1.01         | 1.01                      | 0.061                                            | 1.01                      | 1.00         | 1.00         | 1.00                      | 0.018                                            |
| Selma               | --                         | --            | --            | --                         | --                                                | 1.00                      | 1.00         | 1.00         | 1.00                      | 0.055                                            | 1.03                      | 1.00         | 1.01         | 1.01                      | 0.019                                            |
| Shenandoah          | 1.00                       | 1.01          | 1.01          | 1.01                       | 0.040                                             | 1.00                      | 1.01         | 1.00         | 1.00                      | 0.045                                            | 1.01                      | 1.00         | 1.00         | 1.01                      | 0.109                                            |
| SilverCity          | 1.00                       | 1.01          | 1.00          | 1.00                       | 0.045                                             | 1.02                      | 1.00         | 1.01         | 1.01                      | 0.025                                            | 1.00                      | 1.01         | 1.01         | 1.01                      | 0.040                                            |
| StanleyFarm         | 1.00                       | 1.01          | 1.01          | 1.00                       | 0.037                                             | 1.01                      | 1.00         | 1.00         | 1.01                      | 0.072                                            | 1.00                      | 1.00         | 1.00         | 1.00                      | 0.043                                            |
| Starkville          | 1.00                       | 1.01          | 1.01          | 1.00                       | 0.027                                             | 1.06                      | 1.00         | 1.03         | 1.06                      | 0.020                                            | 1.01                      | 1.00         | 1.01         | 1.01                      | 0.021                                            |
| SudduthFarms        | --                         | --            | --            | --                         | --                                                | 1.00                      | 1.03         | 1.01         | 1.00                      | 0.051                                            | 1.01                      | 1.00         | 1.00         | 1.00                      | 0.207                                            |
| SunleafNursery      | --                         | --            | --            | --                         | --                                                | 1.00                      | 1.00         | 1.00         | 1.00                      | 0.045                                            | 1.10                      | 1.02         | 1.04         | 1.03                      | 0.028                                            |
| Tidewater1          | 1.01                       | 1.00          | 1.01          | 1.01                       | 0.030                                             | 1.00                      | 1.00         | 1.00         | 1.00                      | 0.034                                            | --                        | --           | --           | --                        | --                                               |
| TidewaterArec       | 1.00                       | 1.00          | 1.00          | 1.00                       | 0.101                                             | --                        | --           | --           | --                        | --                                               | 1.00                      | 1.00         | 1.00         | 1.00                      | 0.024                                            |
| TncFortBayou        | 1.01                       | 1.03          | 1.03          | 1.03                       | 0.040                                             | 1.00                      | 1.01         | 1.02         | 1.00                      | 0.117                                            | 1.01                      | 1.00         | 1.00         | 1.00                      | 0.068                                            |
| Tunica              | 1.01                       | 1.01          | 1.02          | 1.01                       | 0.031                                             | 1.02                      | 1.00         | 1.00         | 1.02                      | 0.051                                            | 1.01                      | 1.00         | 1.00         | 1.00                      | 0.042                                            |
| Tuskegee            | 1.00                       | 1.00          | 1.01          | 1.00                       | 0.047                                             | 1.00                      | 1.00         | 1.00         | 1.00                      | 0.050                                            | --                        | --           | --           | --                        | --                                               |
| UapbCampusPB        | 1.02                       | 1.01          | 1.02          | 1.02                       | 0.039                                             | 1.01                      | 1.00         | 1.00         | 1.00                      | 0.058                                            | 1.01                      | 1.01         | 1.00         | 1.01                      | 0.055                                            |
| UapbDewitt          | 1.07                       | 1.00          | 1.02          | 1.07                       | 0.049                                             | 1.01                      | 1.01         | 1.01         | 1.01                      | 0.058                                            | 1.01                      | 1.00         | 1.00         | 1.01                      | 0.048                                            |
| UapbEarle           | 1.02                       | 1.09          | 1.09          | 1.02                       | 0.117                                             | 1.01                      | 1.00         | 1.00         | 1.00                      | 0.023                                            | 1.01                      | 1.00         | 1.00         | 1.01                      | 0.028                                            |
| UapbMarianna        | 1.02                       | 1.03          | 1.01          | 1.01                       | 0.072                                             | 1.00                      | 1.00         | 1.00         | 1.00                      | 0.055                                            | 1.00                      | 1.01         | 1.01         | 1.00                      | 0.071                                            |
| UapbPointRemove     | 1.00                       | 1.02          | 1.01          | 1.00                       | 0.045                                             | 1.00                      | 1.00         | 1.00         | 1.00                      | 0.068                                            | 1.02                      | 1.00         | 1.00         | 1.01                      | 0.011                                            |
| US_CaV              | 1.01                       | 1.00          | 1.00          | 1.00                       | 0.067                                             | --                        | --           | --           | --                        | --                                               | --                        | --           | --           | --                        | --                                               |
| US_Ho1              | 1.03                       | 1.01          | 1.01          | 1.03                       | 0.062                                             | --                        | --           | --           | --                        | --                                               | --                        | --           | --           | --                        | --                                               |
| US_WBW              | 1.01                       | 1.00          | 1.00          | 1.01                       | 0.094                                             | --                        | --           | --           | --                        | --                                               | --                        | --           | --           | --                        | --                                               |
| UWPlattville        | --                         | --            | --            | --                         | --                                                | --                        | --           | --           | --                        | --                                               | 1.01                      | 1.00         | 1.00         | 1.00                      | 0.091                                            |
| Vance               | --                         | --            | --            | --                         | --                                                | --                        | --           | --           | --                        | --                                               | 1.00                      | 1.00         | 1.00         | 1.00                      | 0.058                                            |
| Watkinsville1       | 1.00                       | 1.01          | 1.01          | 1.00                       | 0.064                                             | --                        | --           | --           | --                        | --                                               | --                        | --           | --           | --                        | --                                               |
| Wtars               | 1.00                       | 1.00          | 1.00          | 1.00                       | 0.051                                             | 1.01                      | 1.00         | 1.00         | 1.00                      | 0.049                                            | 1.00                      | 1.00         | 1.00         | 1.00                      | 0.067                                            |
| YoumansFarm         | 1.02                       | 1.01          | 1.01          | 1.00                       | 0.039                                             | 1.00                      | 1.00         | 1.00         | 1.00                      | 0.039                                            | 1.00                      | 1.01         | 1.00         | 1.00                      | 0.034                                            |

**Table S3:** List of calibrated model parameters at all sites where model calibration took place during this research.

| Site                | AMSRE<br>S <sub>c</sub> | AMSRE<br>a | AMSRE<br>b | AMSRE<br>S <sub>w</sub> | SMOS<br>S <sub>c</sub> | SMOS<br>a | SMOS<br>b | SMOS<br>S <sub>w</sub> | SMAP<br>S <sub>c</sub> | SMAP<br>a | SMAP<br>b | SMAP<br>S <sub>w</sub> |
|---------------------|-------------------------|------------|------------|-------------------------|------------------------|-----------|-----------|------------------------|------------------------|-----------|-----------|------------------------|
| Shale Hills Site 15 | 0.04                    | 0.03       | 0.02       | 0.47                    | --                     | --        | --        | --                     | --                     | --        | --        | --                     |
| Shale Hills Site 51 | 0.06                    | 0.21       | 0.04       | 0.29                    | --                     | --        | --        | --                     | --                     | --        | --        | --                     |
| Shale Hills Site 55 | 0.05                    | 0.04       | 0.02       | 0.26                    | --                     | --        | --        | --                     | --                     | --        | --        | --                     |
| Shale Hills Site 60 | 0.06                    | 1.46       | 0.08       | 0.32                    | --                     | --        | --        | --                     | --                     | --        | --        | --                     |
| Shale Hills Site 61 | 0.03                    | 0.03       | 0.02       | 0.29                    | --                     | --        | --        | --                     | --                     | --        | --        | --                     |
| AAMU_JTG            | 0.11                    | 0.28       | 0.28       | 0.57                    | 0.03                   | 0.24      | 0.39      | 0.59                   | 0.02                   | 0.44      | 0.37      | 0.69                   |
| AllenFarms          | 0.20                    | 0.12       | 0.14       | 0.45                    | 0.12                   | 0.24      | 0.52      | 0.48                   | 0.03                   | 0.38      | 0.38      | 0.52                   |
| BeasleyLake         | 0.16                    | 0.03       | 0.05       | 0.72                    | 0.08                   | 0.26      | 0.27      | 0.79                   | 0.03                   | 0.17      | 0.16      | 0.69                   |
| BraggFarm           | 0.07                    | 0.26       | 0.19       | 0.49                    | 0.03                   | 0.36      | 0.25      | 0.46                   | 0.03                   | 0.86      | 0.25      | 0.41                   |
| BroadAcres          | --                      | --         | --         | --                      | 0.09                   | 0.66      | 0.22      | 0.75                   | 0.00                   | 0.15      | 0.13      | 0.45                   |
| CrescentLakes       | 0.13                    | 0.41       | 0.17       | 0.16                    | 0.33                   | 0.10      | 0.14      | 0.17                   | 0.01                   | 0.05      | 0.02      | 0.09                   |
| Cullman_NAHRC       | 0.03                    | 0.10       | 0.06       | 0.30                    | 0.06                   | 0.16      | 0.10      | 0.40                   | 0.03                   | 0.26      | 0.25      | 0.25                   |
| DeeRiverRanch       | --                      | --         | --         | --                      | 0.66                   | 0.08      | 0.54      | 0.61                   | 0.02                   | 0.28      | 0.19      | 0.70                   |
| Dexter              | 0.34                    | 0.03       | 0.06       | 0.44                    | 0.15                   | 0.05      | 0.05      | 0.47                   | 0.04                   | 0.62      | 0.15      | 0.52                   |
| EastviewFarm        | 0.08                    | 0.11       | 0.06       | 0.54                    | 0.23                   | 0.24      | 0.25      | 0.64                   | 0.02                   | 0.71      | 0.31      | 0.55                   |
| ElsberryPMC         | --                      | --         | --         | --                      | --                     | --        | --        | --                     | 0.16                   | 0.12      | 0.12      | 0.62                   |
| Geneva1             | 0.15                    | 0.05       | 0.07       | 0.16                    | 0.39                   | 0.04      | 0.15      | 0.37                   | 0.05                   | 0.07      | 0.06      | 0.07                   |
| GlacialRidge        | 0.24                    | 0.07       | 0.08       | 0.18                    | 0.33                   | 0.06      | 0.17      | 0.23                   | 0.41                   | 0.05      | 0.09      | 0.30                   |
| GoodwinCkPasture    | 0.10                    | 0.05       | 0.09       | 0.55                    | 0.06                   | 0.13      | 0.23      | 0.65                   | 0.08                   | 0.11      | 0.10      | 0.60                   |
| GoodwinCkTimber     | 0.34                    | 0.02       | 0.05       | 0.38                    | 0.28                   | 0.04      | 0.07      | 0.33                   | 0.49                   | 0.11      | 0.09      | 0.30                   |
| Hodges              | 0.15                    | 0.12       | 0.09       | 0.40                    | --                     | --        | --        | --                     | 0.18                   | 0.18      | 0.16      | 0.30                   |
| HubbardBrook        | --                      | --         | --         | --                      | --                     | --        | --        | --                     | 0.89                   | 0.87      | 0.36      | 0.60                   |
| JournaganRanch      | --                      | --         | --         | --                      | 0.88                   | 0.02      | 0.48      | 0.45                   | 0.11                   | 0.10      | 0.10      | 0.11                   |
| KoptisFarms         | --                      | --         | --         | --                      | 0.04                   | 0.17      | 0.15      | 0.23                   | 0.08                   | 0.64      | 0.22      | 0.29                   |
| LittleRiver         | 0.28                    | 0.16       | 0.12       | 0.28                    | 0.20                   | 0.29      | 0.20      | 0.27                   | 0.01                   | 0.62      | 0.15      | 0.27                   |
| LivingstonUWA       | 0.07                    | 0.89       | 0.26       | 0.79                    | 0.06                   | 0.28      | 0.35      | 0.69                   | 0.04                   | 0.29      | 0.23      | 0.63                   |
| LyeBrook            | 0.20                    | 0.15       | 0.05       | 0.54                    | --                     | --        | --        | --                     | 0.69                   | 0.16      | 0.62      | 0.54                   |
| MahantangoCk        | 0.03                    | 0.38       | 0.11       | 0.34                    | --                     | --        | --        | --                     | 0.30                   | 0.26      | 0.15      | 0.34                   |
| MammothCave         | 0.06                    | 0.06       | 0.03       | 0.49                    | 0.32                   | 0.20      | 0.28      | 0.56                   | 0.09                   | 0.06      | 0.06      | 0.51                   |
| MascomaRiver        | 0.18                    | 0.07       | 0.05       | 0.53                    | --                     | --        | --        | --                     | 0.45                   | 0.88      | 0.08      | 0.66                   |
| Mason1              | --                      | --         | --         | --                      | 0.23                   | 0.07      | 0.11      | 0.22                   | 0.13                   | 0.43      | 0.15      | 0.21                   |
| Mayday              | 0.33                    | 0.62       | 0.35       | 0.77                    | 0.04                   | 0.04      | 0.06      | 0.69                   | 0.04                   | 0.56      | 0.28      | 0.73                   |
| McAllisterFarm      | 0.02                    | 0.10       | 0.07       | 0.45                    | 0.07                   | 0.45      | 0.51      | 0.51                   | 0.02                   | 0.61      | 0.37      | 0.45                   |
| MollyCaren1         | --                      | --         | --         | --                      | 0.42                   | 0.07      | 0.50      | 0.71                   | 0.24                   | 0.11      | 0.27      | 0.55                   |
| MorrisFarms         | --                      | --         | --         | --                      | 0.09                   | 0.31      | 0.32      | 0.41                   | 0.05                   | 0.92      | 0.50      | 0.46                   |
| MountMansfield      | 0.24                    | 0.46       | 0.33       | 0.54                    | --                     | --        | --        | --                     | --                     | --        | --        | --                     |
| MtVernon            | 0.04                    | 0.03       | 0.03       | 0.25                    | 0.19                   | 0.02      | 0.04      | 0.19                   | 0.06                   | 0.15      | 0.18      | 0.35                   |
| NPiedmonthArec      | 0.02                    | 0.25       | 0.10       | 0.71                    | 0.25                   | 0.11      | 0.17      | 0.74                   | 0.13                   | 0.18      | 0.23      | 0.67                   |
| PeeDee              | 0.09                    | 0.37       | 0.12       | 0.31                    | --                     | --        | --        | --                     | 0.20                   | 0.48      | 0.14      | 0.33                   |
| PerdidoRivFarms     | --                      | --         | --         | --                      | 0.03                   | 0.65      | 0.24      | 0.51                   | 0.04                   | 0.71      | 0.45      | 0.41                   |
| Perthshire          | 0.32                    | 0.27       | 0.24       | 0.83                    | 0.05                   | 0.20      | 0.14      | 0.82                   | 0.04                   | 0.13      | 0.11      | 0.65                   |
| PowderMill          | 0.09                    | 0.22       | 0.17       | 0.19                    | 0.83                   | 0.09      | 0.51      | 0.36                   | 0.41                   | 0.19      | 0.21      | 0.18                   |
| Princeton1          | 0.13                    | 0.02       | 0.02       | 0.38                    | --                     | --        | --        | --                     | 0.19                   | 0.48      | 0.50      | 0.50                   |
| ReynoldsHomestead   | 0.02                    | 0.24       | 0.12       | 0.66                    | --                     | --        | --        | --                     | 0.59                   | 0.08      | 0.20      | 0.65                   |
| RockSprings         | 0.03                    | 0.12       | 0.06       | 0.52                    | --                     | --        | --        | --                     | 0.17                   | 0.01      | 0.02      | 0.27                   |
| SandyRidge          | 0.15                    | 0.66       | 0.37       | 0.22                    | 0.08                   | 0.34      | 0.15      | 0.41                   | 0.38                   | 0.11      | 0.09      | 0.36                   |
| Scott               | 0.22                    | 0.22       | 0.24       | 0.68                    | 0.17                   | 0.41      | 0.33      | 0.75                   | 0.05                   | 0.42      | 0.23      | 0.71                   |
| SellersLake1        | 0.23                    | 0.43       | 0.14       | 0.04                    | 0.26                   | 0.81      | 0.04      | 0.11                   | 0.60                   | 0.84      | 0.04      | 0.08                   |
| Selma               | --                      | --         | --         | --                      | 0.14                   | 0.51      | 0.09      | 0.15                   | 0.01                   | 0.90      | 0.10      | 0.13                   |
| Shenandoah          | 0.01                    | 0.13       | 0.06       | 0.46                    | 0.84                   | 0.02      | 0.95      | 0.65                   | 0.25                   | 0.12      | 0.28      | 0.51                   |
| SilverCity          | 0.55                    | 0.04       | 0.24       | 0.69                    | 0.07                   | 0.67      | 0.29      | 0.82                   | 0.02                   | 0.13      | 0.10      | 0.60                   |
| StanleyFarm         | 0.15                    | 0.14       | 0.15       | 0.52                    | 0.15                   | 0.16      | 0.26      | 0.42                   | 0.02                   | 0.44      | 0.33      | 0.45                   |
| Starkville          | 0.03                    | 0.18       | 0.13       | 0.76                    | 0.07                   | 0.03      | 0.03      | 0.70                   | 0.00                   | 0.24      | 0.12      | 0.68                   |
| SudduthFarms        | --                      | --         | --         | --                      | 0.46                   | 0.08      | 0.14      | 0.40                   | 0.17                   | 0.27      | 0.32      | 0.25                   |
| SunleafNursery      | --                      | --         | --         | --                      | 0.31                   | 0.25      | 0.23      | 0.54                   | 0.89                   | 0.06      | 0.11      | 0.48                   |
| Tidewater1          | 0.15                    | 0.06       | 0.08       | 0.42                    | 0.05                   | 0.12      | 0.15      | 0.49                   | --                     | --        | --        | --                     |
| TidewaterArec       | 0.06                    | 0.14       | 0.16       | 0.20                    | --                     | --        | --        | --                     | 0.17                   | 0.29      | 0.27      | 0.46                   |
| TncFortBayou        | 0.55                    | 0.02       | 0.67       | 0.50                    | 0.09                   | 0.04      | 0.04      | 0.10                   | 0.63                   | 0.09      | 0.16      | 0.43                   |
| Tunica              | 0.21                    | 0.02       | 0.04       | 0.67                    | 0.04                   | 0.13      | 0.16      | 0.60                   | 0.00                   | 0.08      | 0.06      | 0.61                   |
| Tuskegee            | 0.03                    | 0.27       | 0.13       | 0.29                    | 0.07                   | 0.32      | 0.25      | 0.31                   | --                     | --        | --        | --                     |
| UapbCampusPB        | 0.12                    | 0.04       | 0.06       | 0.41                    | 0.22                   | 0.05      | 0.11      | 0.39                   | 0.11                   | 0.19      | 0.13      | 0.41                   |
| UapbDewitt          | 0.18                    | 0.06       | 0.12       | 0.50                    | 0.09                   | 0.10      | 0.16      | 0.55                   | 0.06                   | 0.14      | 0.09      | 0.38                   |
| UapbEarle           | 0.06                    | 0.06       | 0.06       | 0.64                    | 0.02                   | 0.16      | 0.14      | 0.72                   | 0.05                   | 0.41      | 0.15      | 0.70                   |
| UapbMarianna        | 0.05                    | 0.40       | 0.45       | 0.63                    | 0.11                   | 0.06      | 0.13      | 0.58                   | 0.03                   | 0.10      | 0.08      | 0.51                   |
| UapbPointRemove     | 0.08                    | 0.35       | 0.24       | 0.62                    | 0.41                   | 0.12      | 0.27      | 0.55                   | 0.03                   | 0.94      | 0.35      | 0.68                   |
| US_CaV              | 0.06                    | 0.05       | 0.04       | 0.47                    | --                     | --        | --        | --                     | --                     | --        | --        | --                     |
| US_Ho1              | 0.42                    | 0.26       | 0.09       | 0.32                    | --                     | --        | --        | --                     | --                     | --        | --        | --                     |
| US_WBV              | 0.02                    | 0.03       | 0.05       | 0.33                    | --                     | --        | --        | --                     | --                     | --        | --        | --                     |
| UWPlatteville       | --                      | --         | --         | --                      | --                     | --        | --        | --                     | 0.24                   | 0.22      | 0.39      | 0.65                   |
| Vance               | --                      | --         | --         | --                      | --                     | --        | --        | --                     | 0.03                   | 0.04      | 0.05      | 0.58                   |
| Watkinsville1       | 0.09                    | 0.31       | 0.18       | 0.27                    | --                     | --        | --        | --                     | --                     | --        | --        | --                     |
| Wtars               | 0.03                    | 0.06       | 0.06       | 0.33                    | 0.19                   | 0.14      | 0.40      | 0.48                   | 0.02                   | 0.21      | 0.18      | 0.44                   |
| YoumansFarm         | 0.37                    | 0.31       | 0.26       | 0.50                    | 0.05                   | 0.48      | 0.28      | 0.45                   | 0.09                   | 0.64      | 0.24      | 0.43                   |
